# Supplementary material for: Myosin-based regulation of twitch and tetanic contractions in mammalian skeletal muscle
Source: eLife. 2021 Jun 14;10:e68211. doi: 10.7554/eLife.68211 (PMC8275128; doi:10.7554/eLife.68211)
Supplement: Figure 1—source data 1. [file elife-68211-fig1-data1.xlsx]

## Sheet: 1D Profiles - Sarcomeres
		Rest		Early Activation		Peak Force		Mechanically Relaxed
Key	Reciprocal Spacing (nm-1)	Mean Twitch Intensity	Mean Tetanus Intensity	Mean Twitch Intensity	Mean Tetanus Intensity	Mean Twitch Intensity	Mean Tetanus Intensity	Mean Twitch Intensity	Mean Tetanus Intensity
Rest	0.0031471	0	0	0	0	0	0	0	0
Early Activation	0.0033569	0	0	0	0	0	0	0	0
Peak Force	0.00356671	0.0763268	0.11297	0.0521	0.0409509	0.0331072	0.0180869	0.0799005	0.0652161
Mechanically Relaxed	0.00377652	0.222047	0.215656	0.207762	0.256199	0.123966	0.0779041	0.19702	0.168644
	0.00398632	0.202908	0.269334	0.225048	0.183691	0.168908	0.073451	0.216544	0.194092
	0.00419613	0.050248	0.0538647	0.135626	0.143398	0.109343	0.0197608	0.0655751	0.0795697
	0.00440594	0.0175681	0	0.0138877	0	0.0183605	0.000998525	0.0125604	0.0138639
	0.00461574	0.0822645	0.0959972	0.0985148	0.114872	0.056262	0.0296341	0.0804438	0.0668452
	0.00482555	0.120259	0.148901	0.109865	0.0966027	0.0833932	0.0330839	0.11809	0.109805
	0.00503536	0.0363981	0.0425606	0.0628183	0.0688036	0.0411464	0	0.0410397	0.0381743
	0.00524516	0	0	0	0	0.0055214	0.00574605	0	0
	0.00545497	0.00859644	0.0270175	0.0114088	0.0132664	0	0.0378988	0.0109169	0.0141425
	0.00566478	0.088805	0.118381	0.0342454	0.0453149	0.0219703	0.0416407	0.0664943	0.0527081
	0.00587458	0.106352	0.0757867	0.0430601	0.0540132	0.0189128	0.0109316	0.0614555	0.0396419
	0.00608439	0.055219	0.045087	0.0130281	0.0221516	0.00312017	0.000114558	0.0211419	0.00900258
	0.00629419	0.0204007	0.0364587	0.0287816	0.0227264	0.0164137	0.037083	0.023526	0.0253664
	0.006504	0.106755	0.132296	0.0466511	0.0571041	0.0321827	0.0689453	0.0744918	0.0660407
	0.00671381	0.125786	0.0959623	0.0736599	0.0926452	0.0418568	0.0358166	0.0760521	0.0674458
	0.00692362	0.043947	0.0385063	0.0270444	0.0412467	0.0165816	0.00237296	0.0277095	0.0253505
	0.00713342	0	0	0	0	0	0	0	0
	0.00734323	0.049126	0.0464526	0.00691945	0.0162762	0.00815018	0.0288138	0.0193442	0.0195492
	0.00755303	0.0655953	0.0524254	0.0528315	0.0764236	0.0366985	0.0429812	0.0410926	0.042514
	0.00776284	0.0213669	0.0169701	0.0449329	0.0611409	0.0405062	0.0230102	0.033457	0.035307
	0.00797265	0.00448079	0.00193415	0.009754	0.00738363	0.0124636	0.00356916	0.0133509	0.00798466
	0.00818245	0.0429306	0.0311223	0	0.00429671	0	0.0037588	0.0128613	0.0069934

## Sheet: Force (kPa)
			FIGURE 1 C									FIGURE 1 C		Note - Force has been normalised to muscle size for each muscle and expressed in kPa
			Twitch									Tetanus		Time has been corrected to correlate with the timing of the first stimulation (t=0ms)
		Time (ms)	M06_Force	M12	M23	M24	Mean	SE			Time (ms)	M05	M10	M11	M23	M24	Mean	SE
		-132.5	3.49576	2.51938	2.97184	3.13461	3.0304	0.202483			-132.5	2.53723	2.72865	2.96603	3.1485	3.09128	2.89434	0.114783
		-132.4	3.49446	2.45489	2.98965	3.1635	3.02563	0.21715			-132.4	2.4124	2.67099	3.01769	3.04318	3.00344	2.82954	0.124585
		-132.3	3.57923	2.53745	2.98456	3.12426	3.05638	0.21456			-132.3	2.5509	2.67221	3.02344	3.08393	3.10678	2.88745	0.115065
		-132.2	3.5075	2.47553	3.01005	3.1945	3.04689	0.216365			-132.2	2.5167	2.90885	2.94021	3.13151	3.14814	2.92908	0.11392
		-132.1	3.57272	2.48842	2.94381	3.09949	3.02611	0.223615			-132.1	2.56458	2.91616	2.95454	3.11451	3.06029	2.92202	0.0961826
		-132	3.56228	2.50391	3.04317	3.14494	3.06357	0.217749			-132	2.5492	2.94028	3.00047	3.09413	3.09387	2.93559	0.100924
		-131.9	3.48794	2.49358	2.97183	3.10569	3.01476	0.205271			-131.9	2.44147	2.9283	2.99185	3.12811	3.08095	2.91413	0.123139
		-131.8	3.56881	2.48069	2.97947	3.22546	3.06361	0.228819			-131.8	2.55261	2.89801	2.989	3.1179	3.07319	2.92614	0.100663
		-131.7	3.49316	2.53229	2.954	3.13253	3.028	0.19969			-131.7	2.50303	2.96917	2.88856	3.09753	3.09647	2.91095	0.109436
		-131.6	3.53098	2.45489	3.03806	3.21101	3.05874	0.225695			-131.6	2.60562	2.89454	3.04064	3.15867	3.11969	2.96383	0.100317
		-131.5	3.55836	2.51938	2.9591	3.17177	3.05215	0.216614			-131.5	2.45343	2.90529	2.93734	3.13829	3.09387	2.90564	0.12146
		-131.4	3.56359	2.45231	2.96673	3.16557	3.03705	0.231054			-131.4	2.53723	2.96365	3.01482	3.10772	3.06545	2.93777	0.103011
		-131.3	3.47489	2.49874	2.98458	3.1821	3.03508	0.205194			-131.3	2.50473	2.93342	2.90864	3.04658	3.1068	2.90003	0.105281
		-131.2	3.54011	2.49102	3.00495	3.12635	3.04061	0.216059			-131.2	2.54064	2.94187	2.97465	3.15867	3.14297	2.95176	0.111582
		-131.1	3.58315	2.44973	2.95655	3.19654	3.04649	0.237123			-131.1	2.47225	2.94232	2.95455	3.15867	3.0577	2.9171	0.11791
		-131	3.50881	2.50132	3.01005	3.13668	3.03921	0.208206			-131	2.45172	2.89819	3.02056	3.1383	3.16105	2.93396	0.129355
		-130.9	3.52317	2.50907	2.94633	3.18208	3.04016	0.212975			-130.9	2.56972	2.95461	2.98614	3.06355	3.11197	2.9372	0.095981
		-130.8	3.5675	2.46521	3.01259	3.14286	3.04704	0.227261			-130.8	2.52183	2.95121	2.95455	3.21303	3.06546	2.94122	0.115213
		-130.7	3.51142	2.51164	2.96419	3.19654	3.04595	0.210457			-130.7	2.52014	2.9176	2.98325	3.10432	3.06804	2.91867	0.104828
		-130.6	3.49968	2.48326	3.02535	3.10982	3.02953	0.209347			-130.6	2.46882	2.90517	2.92013	3.17227	3.14038	2.92135	0.125694
		-130.5	3.54143	2.49874	2.92342	3.18003	3.0359	0.219379			-130.5	2.61588	2.96716	2.9976	3.1315	3.00086	2.9426	0.0864445
		-130.4	3.52185	2.491	2.98456	3.12842	3.03146	0.212951			-130.4	2.50131	2.88927	2.9603	3.17566	3.08613	2.92253	0.116361
		-130.3	3.49447	2.52971	2.97183	3.16558	3.0404	0.201526			-130.3	2.4654	2.91561	2.96316	3.16547	3.04478	2.91089	0.119153
		-130.2	3.54141	2.53228	3.04826	3.17177	3.07343	0.208598			-130.2	2.50473	2.95109	2.88855	3.15187	3.07062	2.91337	0.111945
		-130.1	3.52968	2.4394	3.01259	3.1821	3.04094	0.227568			-130.1	2.49448	2.88797	2.95744	3.15188	3.09388	2.91713	0.11564
		-130	3.50098	2.55292	3.07885	3.13874	3.06787	0.195342			-130	2.5663	2.96153	2.92011	3.14849	3.09129	2.93754	0.101695
		-129.9	3.47621	2.5039	2.91068	3.1408	3.0079	0.204216			-129.9	2.48763	2.94222	2.97177	3.14508	3.10421	2.93018	0.11709
		-129.8	3.52185	2.46004	2.97694	3.21307	3.04297	0.224057			-129.8	2.49449	2.94938	2.94595	3.11792	3.05771	2.91309	0.109657
		-129.7	3.46707	2.51939	2.98456	3.20068	3.04293	0.200475			-129.7	2.5338	2.86089	2.92874	3.13829	3.15331	2.92301	0.112862
		-129.6	3.59749	2.5168	3.03298	3.1573	3.07614	0.222322			-129.6	2.50132	2.93879	2.96315	3.15867	3.07835	2.92806	0.113847
		-129.5	3.49708	2.52455	2.92596	3.1284	3.019	0.202827			-129.5	2.54064	2.95297	2.9402	3.05336	3.13522	2.92448	0.102326
		-129.4	3.51403	2.43683	2.97183	3.17177	3.02361	0.225361			-129.4	2.48934	2.96191	2.9402	3.1383	3.0422	2.91439	0.111817
		-129.3	3.53229	2.51681	2.98202	3.20481	3.05898	0.213143			-129.3	2.58682	2.94763	2.95743	3.19944	3.0732	2.9529	0.102303
		-129.2	3.49185	2.51422	2.91832	3.19863	3.03075	0.208215			-129.2	2.5355	2.91755	2.9402	3.11452	3.14556	2.93067	0.108719
		-129.1	3.45925	2.55035	2.99477	3.10569	3.02752	0.187364			-129.1	2.51159	2.91957	2.95168	3.04997	3.03702	2.89397	0.0987426
		-129	3.53098	2.52196	2.97692	3.18416	3.05351	0.210843			-129	2.55604	2.9316	2.94594	3.21303	3.06546	2.94242	0.109038
		-128.9	3.52315	2.44715	2.96927	3.15732	3.02422	0.224106			-128.9	2.57656	2.92618	2.95455	3.09752	3.14039	2.93904	0.0993626
		-128.8	3.4449	2.5426	2.96674	3.20687	3.04028	0.192475			-128.8	2.51328	2.94418	2.98039	3.11452	3.11712	2.9339	0.110765
		-128.7	3.45142	2.49616	3.04571	3.16352	3.0392	0.200066			-128.7	2.57485	2.91552	2.91151	3.19944	3.13006	2.94628	0.109082
		-128.6	3.46316	2.53228	2.96928	3.20068	3.04135	0.197412			-128.6	2.52012	2.91602	3.0263	3.09074	3.02669	2.91597	0.102876
		-128.5	3.51404	2.47809	2.97694	3.12841	3.02437	0.214334			-128.5	2.4466	2.93165	2.88856	3.11111	3.08096	2.89178	0.119097
		-128.4	3.48273	2.57614	2.99221	3.211	3.06552	0.191506			-128.4	2.56287	2.90731	2.99187	3.12469	3.11971	2.94129	0.10305
		-128.3	3.58576	2.46004	2.97948	3.20687	3.05804	0.235302			-128.3	2.54918	2.8875	2.92299	3.15866	3.09645	2.92296	0.106448
		-128.2	3.46447	2.52713	2.99986	3.16764	3.03978	0.196025			-128.2	2.5321	2.96183	2.9316	3.08054	3.04736	2.91069	0.0984658
		-128.1	3.50098	2.49101	3.06355	3.16557	3.05528	0.210017			-128.1	2.49276	2.9493	2.97751	3.10771	3.12489	2.93043	0.114753
		-128	3.42664	2.53228	2.95654	3.10363	3.00477	0.185589			-128	2.50986	2.94213	2.94307	3.18585	3.15588	2.94736	0.120791
		-127.9	3.47751	2.50647	2.97694	3.11808	3.01975	0.200934			-127.9	2.52183	2.90347	2.98325	3.10772	3.11712	2.92668	0.108785
		-127.8	3.52968	2.5168	2.96164	3.18828	3.0491	0.212393			-127.8	2.50816	2.91748	2.93733	3.21643	3.05511	2.9269	0.117433
		-127.7	3.51533	2.47811	3.01769	3.12427	3.03385	0.213914			-127.7	2.54065	2.9459	2.99474	3.17227	3.11455	2.95362	0.110905
		-127.6	3.46576	2.53229	2.96673	3.19242	3.0393	0.19741			-127.6	2.49618	2.9797	2.92299	3.08733	3.1042	2.91808	0.110704
		-127.5	3.46578	2.50648	2.97438	3.12634	3.01825	0.199123			-127.5	2.48763	2.9797	2.95742	3.14169	3.12229	2.93775	0.118406
		-127.4	3.50751	2.56323	3.02024	3.08711	3.04452	0.193304			-127.4	2.55946	2.90506	2.97177	3.14169	3.0086	2.91731	0.0974311
		-127.3	3.50099	2.43682	2.98712	3.2234	3.03708	0.225968			-127.3	2.50131	2.96351	2.9029	3.11451	3.08096	2.91264	0.109762
		-127.2	3.43968	2.5555	3.03043	3.18003	3.05141	0.185665			-127.2	2.46541	2.94227	2.96315	3.11791	3.09645	2.91704	0.118168
		-127.1	3.52576	2.46005	3.0024	3.16764	3.03896	0.221737			-127.1	2.54749	2.95294	3.00334	3.19263	3.10163	2.95961	0.110967
		-127	3.51273	2.48842	3.02023	3.10157	3.03074	0.210466			-127	2.51329	2.94015	2.97177	3.11111	3.09387	2.92604	0.108415
		-126.9	3.51273	2.44198	2.95654	3.16144	3.01817	0.223774			-126.9	2.55603	2.94264	2.94595	3.17567	3.09645	2.94335	0.106638
		-126.8	3.47882	2.46005	2.99731	3.13047	3.01666	0.211489			-126.8	2.48934	2.97793	2.95743	3.10094	3.11196	2.92752	0.113914
		-126.7	3.55968	2.51936	2.94635	3.15525	3.04516	0.216617			-126.7	2.49278	2.91733	3.02629	3.17227	3.06286	2.9343	0.117654
		-126.6	3.49446	2.51937	2.96163	3.14905	3.03113	0.203164			-126.6	2.54406	2.93881	2.94021	3.13151	3.1378	2.93848	0.107833
		-126.5	3.5975	2.49874	2.99475	3.15112	3.06053	0.226657			-126.5	2.50474	2.93001	2.9115	3.16886	3.10162	2.92335	0.115645
		-126.4	3.5388	2.41877	2.96927	3.17177	3.02466	0.233836			-126.4	2.4808	2.95819	2.97751	3.16886	3.13522	2.94412	0.123087
		-126.3	3.43839	2.48586	2.97692	3.13874	3.00998	0.199146			-126.3	2.5663	2.9816	3.00046	3.09752	3.09647	2.94847	0.098483
		-126.2	3.52837	2.51422	3.00241	3.17384	3.05471	0.210834			-126.2	2.49961	2.88243	2.92873	3.20963	3.13004	2.93009	0.123635
		-126.1	3.51403	2.49616	3.0024	3.20894	3.05538	0.213986			-126.1	2.54064	2.92643	2.9689	3.17226	3.1843	2.95851	0.116709
		-126	3.45533	2.49101	3.0024	3.14493	3.02342	0.201084			-126	2.54234	2.9122	2.93447	3.18245	3.1068	2.93565	0.110781
		-125.9	3.48924	2.47036	2.97437	3.14079	3.01869	0.211927			-125.9	2.5475	2.94948	2.9402	3.18586	3.16622	2.95785	0.11493
		-125.8	3.52707	2.50391	2.99985	3.15112	3.04549	0.211832			-125.8	2.48763	2.92835	2.97465	3.21642	3.11454	2.94432	0.125051
		-125.7	3.5036	2.49874	2.95143	3.22959	3.04584	0.214385			-125.7	2.57998	2.9796	2.93446	3.22323	3.24115	2.99168	0.12016
		-125.6	3.50229	2.44198	3.03297	3.12015	3.02435	0.219245			-125.6	2.568	2.92688	2.96603	3.06696	3.09129	2.92383	0.0940562
		-125.5	3.47621	2.51938	3.04827	3.10981	3.03842	0.197116			-125.5	2.4825	2.9673	2.96317	3.25381	3.13521	2.9604	0.131357
		-125.4	3.45273	2.50906	2.95399	3.23579	3.03789	0.203707			-125.4	2.59195	2.89107	2.98325	3.18245	3.11197	2.95214	0.103205
		-125.3	3.52707	2.40588	2.96928	3.12222	3.00611	0.232113			-125.3	2.53209	2.96376	3.01481	3.12131	3.1197	2.95034	0.108899
		-125.2	3.51272	2.55807	3.01005	3.16764	3.06212	0.198105			-125.2	2.53038	2.96553	2.92587	3.20964	3.07062	2.94041	0.113667
		-125.1	3.52967	2.49616	3.04826	3.1759	3.0625	0.214486			-125.1	2.48422	2.9653	2.93734	3.17567	3.11971	2.93645	0.121688
		-125	3.42404	2.51422	2.99221	3.15318	3.02091	0.190955			-125	2.51842	2.89297	2.97465	3.1077	3.08096	2.91494	0.1063
		-124.9	3.54272	2.49617	2.95398	3.14493	3.03445	0.217325			-124.9	2.4979	2.89336	2.97751	3.15527	3.14814	2.93444	0.120114
		-124.8	3.44361	2.43167	2.99985	3.1346	3.00243	0.211715			-124.8	2.49619	2.94383	3.01769	3.10434	3.09388	2.93119	0.112542
		-124.7	3.51533	2.42908	2.94126	3.13461	3.00507	0.226014			-124.7	2.49789	2.94108	2.99473	3.10772	3.13264	2.93481	0.114796
		-124.6	3.50881	2.53486	3.0126	3.19243	3.06217	0.203503			-124.6	2.54407	2.94048	2.97177	3.16546	3.10162	2.94468	0.108308
		-124.5	3.54663	2.48069	3.00495	3.11602	3.03707	0.21918			-124.5	2.48251	2.91802	3.01769	3.11791	3.0913	2.92549	0.116041
		-124.4	3.49837	2.49616	2.97183	3.147	3.02834	0.20845			-124.4	2.53722	3.01301	2.98039	3.10432	3.06546	2.94008	0.10294
		-124.3	3.53751	2.47036	3.02024	3.0933	3.03035	0.218871			-124.3	2.50986	2.89647	2.99761	3.08734	3.15072	2.9284	0.113064
		-124.2	3.49315	2.44973	2.9591	3.16766	3.01741	0.218816			-124.2	2.48593	2.92847	3.00047	3.10092	3.06547	2.91625	0.111532
		-124.1	3.48404	2.51422	3.04572	3.13254	3.04413	0.200446			-124.1	2.568	2.91412	3.05499	3.05676	3.04478	2.92773	0.0938433
		-124	3.54663	2.45489	2.95654	3.12222	3.02007	0.225678			-124	2.5492	2.95129	2.96604	3.15529	3.05511	2.93539	0.103205
		-123.9	3.50098	2.48585	2.98202	3.17383	3.03567	0.212287			-123.9	2.4996	2.89454	2.98612	3.17905	3.07578	2.92702	0.116808
		-123.8	3.46968	2.58645	2.97439	3.11808	3.03715	0.182734			-123.8	2.52525	2.92666	3.02918	3.12471	3.08096	2.93735	0.10819
		-123.7	3.55707	2.54002	2.99986	3.2048	3.07544	0.212345			-123.7	2.51841	2.92814	2.9603	3.09414	3.08613	2.91742	0.105085
		-123.6	3.55707	2.48842	3.01259	3.0933	3.03784	0.218931			-123.6	2.52526	2.91417	2.99187	3.20285	3.10163	2.94716	0.11626
		-123.5	3.49577	2.491	2.97948	3.1883	3.03863	0.211102			-123.5	2.53381	2.91938	2.96602	3.11452	3.08096	2.92294	0.103673
		-123.4	3.58445	2.48843	2.9973	3.14287	3.05326	0.225898			-123.4	2.53381	2.8699	2.97465	3.10433	3.09904	2.91634	0.105024
		-123.3	3.51533	2.54002	2.92851	3.17176	3.03891	0.205286			-123.3	2.57655	2.89628	2.98612	3.09074	3.12488	2.93491	0.0982111
		-123.2	3.45534	2.48326	2.98967	3.14493	3.0183	0.20292			-123.2	2.54406	2.86993	2.97751	3.08394	3.13523	2.92213	0.104958
		-123.1	3.56228	2.50907	2.99221	3.13666	3.05006	0.217157			-123.1	2.54065	2.9477	2.98612	3.13829	3.13781	2.95011	0.109452
		-123	3.51533	2.49874	2.98967	3.13874	3.03562	0.21038			-123	2.59877	2.86453	2.9115	3.09074	3.06802	2.90671	0.0884628
		-122.9	3.53488	2.51421	2.96164	3.11808	3.0322	0.210822			-122.9	2.53211	2.92112	2.9976	3.14508	3.1042	2.94002	0.109331
		-122.8	3.52317	2.51164	3.04826	3.13459	3.05441	0.208326			-122.8	2.52355	2.97616	2.99186	3.1213	3.05511	2.9336	0.105676
		-122.7	3.56229	2.491	2.95654	3.17797	3.04695	0.223606			-122.7	2.63299	2.88395	3.00907	3.16208	3.1042	2.95846	0.0940072
		-122.6	3.54402	2.48585	2.9973	3.15319	3.04509	0.219022			-122.6	2.48764	2.94058	2.96315	3.08055	3.08353	2.91109	0.10985
		-122.5	3.5662	2.52455	2.96929	3.23372	3.07344	0.219968			-122.5	2.60563	2.92983	2.93161	3.11451	3.11713	2.93974	0.0932219
		-122.4	3.51795	2.47036	2.94126	3.16352	3.02327	0.219244			-122.4	2.51499	2.909	2.9976	3.14849	3.14038	2.94209	0.115868
		-122.3	3.57662	2.50906	3.0024	3.17797	3.06651	0.221265			-122.3	2.49447	2.86277	2.96603	3.08054	3.08612	2.89798	0.108952
		-122.2	3.51924	2.51164	2.97183	3.1532	3.03898	0.209422			-122.2	2.57485	2.94208	2.95742	3.11111	3.08871	2.93484	0.096153
		-122.1	3.60923	2.44198	2.99986	3.10363	3.03868	0.239323			-122.1	2.53893	2.93508	3.02343	3.17905	3.08612	2.95252	0.110805
		-122	3.61966	2.47294	2.88775	3.17383	3.03855	0.241289			-122	2.5321	2.92307	2.95742	3.14849	3.07838	2.92789	0.10697
		-121.9	3.53359	2.48067	3.00495	3.16558	3.0462	0.218581			-121.9	2.4979	2.87711	2.95456	3.11452	3.10163	2.90914	0.112125
		-121.8	3.52315	2.54775	2.98456	3.14699	3.05061	0.202034			-121.8	2.50987	2.92624	2.94881	3.07716	3.03962	2.90034	0.101526
		-121.7	3.56229	2.47551	2.92088	3.16352	3.03055	0.227399			-121.7	2.44831	2.90857	2.9316	3.15527	3.09388	2.90752	0.12401
		-121.6	3.42404	2.41877	2.98202	3.14906	2.99347	0.212136			-121.6	2.55775	2.97435	2.92012	3.14169	3.06287	2.93136	0.100771
		-121.5	3.49707	2.44457	2.92597	3.09744	2.99126	0.217992			-121.5	2.54578	2.90529	2.93448	3.11111	3.1378	2.92689	0.105875
		-121.4	3.53881	2.50131	2.98457	3.15732	3.0455	0.215195			-121.4	2.52526	2.91421	2.89715	3.10433	3.07061	2.90231	0.102828
		-121.3	3.52706	2.43167	2.97183	3.12221	3.01319	0.226536			-121.3	2.52355	2.92648	2.94307	3.14508	3.11714	2.93106	0.111054
		-121.2	3.48924	2.49358	3.01515	3.19449	3.04811	0.209088			-121.2	2.56458	2.96527	2.9976	3.1213	3.08613	2.94697	0.099719
		-121.1	3.52185	2.42909	2.95398	3.10362	3.00213	0.225666			-121.1	2.47395	2.90512	2.9976	3.08055	3.09129	2.9097	0.11397
		-121	3.50621	2.51422	2.97183	3.16352	3.03894	0.2069			-121	2.49276	2.99908	2.92299	3.13152	3.04477	2.91823	0.111599
		-120.9	3.49186	2.50648	2.95909	3.19449	3.03798	0.208009			-120.9	2.51158	2.92128	2.9775	3.12469	3.1042	2.92785	0.110824
		-120.8	3.45664	2.48585	2.9336	3.14493	3.00525	0.203751			-120.8	2.43292	2.92966	2.9402	3.15867	3.10163	2.91262	0.127951
		-120.7	3.48012	2.49617	2.97183	3.17177	3.02997	0.20637			-120.7	2.54064	2.94774	2.9029	3.07714	3.09387	2.91246	0.0999031
		-120.6	3.48924	2.51164	2.93871	3.17177	3.02784	0.205754			-120.6	2.46882	2.87322	2.97177	3.17906	3.06029	2.91063	0.121405
		-120.5	3.52837	2.47552	2.95655	3.15732	3.02944	0.219361			-120.5	2.54408	2.94603	2.98039	3.0194	3.10162	2.9183	0.0970813
		-120.4	3.49968	2.46263	3.04062	3.13873	3.03542	0.214928			-120.4	2.53038	2.9527	2.94882	3.16547	3.09645	2.93876	0.110303
		-120.3	3.51143	2.51422	2.98456	3.13666	3.03672	0.20637			-120.3	2.53039	2.97445	2.91725	3.13149	3.12488	2.93569	0.1096
		-120.2	3.48273	2.52454	2.96673	3.22547	3.04987	0.204346			-120.2	2.50303	2.91928	2.96603	3.17227	3.1688	2.94588	0.122102
		-120.1	3.51013	2.50131	2.95143	3.13667	3.02488	0.209658			-120.1	2.57826	2.94231	2.91725	3.13149	3.05769	2.9254	0.0950885
		-120	3.4423	2.44971	3.00495	3.21306	3.02751	0.212297			-120	2.51158	3.00398	2.96891	3.12131	3.06028	2.93321	0.108532
		-119.9	3.50099	2.47037	3.01771	3.15114	3.03505	0.214036			-119.9	2.6005	2.89339	2.9316	3.18245	3.04995	2.93158	0.0969595
		-119.8	3.5375	2.49358	2.97947	3.11602	3.03164	0.215104			-119.8	2.515	2.89838	2.94596	3.17226	3.07321	2.92096	0.11231
		-119.7	3.51272	2.52454	2.98966	3.18623	3.05329	0.206634			-119.7	2.56458	2.8875	2.98325	3.20624	3.10679	2.94967	0.110408
		-119.6	3.49187	2.491	3.02024	3.15319	3.03907	0.207923			-119.6	2.46541	2.93183	2.90003	3.15189	3.05511	2.90085	0.117767
		-119.5	3.4736	2.54518	3.00496	3.16764	3.04785	0.193677			-119.5	2.64666	2.94375	2.99187	3.08733	3.08871	2.95166	0.0812076
		-119.4	3.46969	2.53227	3.00241	3.16558	3.04249	0.1957			-119.4	2.49961	2.93513	2.98613	3.1213	3.06027	2.92049	0.109893
		-119.3	3.57402	2.51423	2.9973	3.15731	3.06072	0.218991			-119.3	2.56288	2.9742	2.94594	3.06016	3.11713	2.93206	0.0971922
		-119.2	3.48533	2.46263	2.99221	3.1408	3.02024	0.212635			-119.2	2.515	2.8823	2.98325	3.2402	3.12745	2.94964	0.124624
		-119.1	3.49577	2.54518	3.0024	3.14699	3.04759	0.196892			-119.1	2.58853	2.91433	2.9402	3.12472	3.11713	2.93698	0.0973757
		-119	3.46447	2.41618	3.02534	3.15112	3.01428	0.219704			-119	2.54406	2.89617	2.95169	3.25039	3.0732	2.9431	0.116803
		-118.9	3.55706	2.57356	3.02024	3.17177	3.08066	0.203318			-118.9	2.49959	2.94579	2.96891	3.12471	3.1223	2.93226	0.114428
		-118.8	3.47751	2.40072	3.01004	3.18415	3.0181	0.227277			-118.8	2.50303	2.94419	2.93734	3.08394	3.09387	2.91247	0.107605
		-118.7	3.47751	2.56067	3.02279	3.12222	3.0458	0.188878			-118.7	2.48592	2.97783	2.92012	3.14508	3.14556	2.9349	0.120872
		-118.6	3.53098	2.51938	2.95401	3.19241	3.04919	0.212601			-118.6	2.52184	2.94428	2.9603	3.14169	3.0577	2.92516	0.10694
		-118.5	3.45794	2.45748	3.02024	3.12634	3.0155	0.208058			-118.5	2.44317	2.93331	2.98038	3.04656	3.03961	2.8886	0.113265
		-118.4	3.48142	2.46779	3.02279	3.15525	3.03181	0.211263			-118.4	2.5338	2.96871	2.88855	3.15188	3.09129	2.92684	0.108487
		-118.3	3.45012	2.48842	2.96419	3.0582	2.99023	0.197612			-118.3	2.4825	2.94051	3.02916	3.17227	3.10421	2.94573	0.122066
		-118.2	3.55706	2.47553	3.03807	3.18622	3.06422	0.224539			-118.2	2.515	2.95999	2.92301	3.12131	3.1068	2.92522	0.109755
		-118.1	3.49707	2.49102	2.98457	3.09742	3.01752	0.207091			-118.1	2.47909	2.905	3.02344	3.24362	3.09904	2.95004	0.129923
		-118	3.46577	2.43683	2.96674	3.0933	2.99066	0.21283			-118	2.50816	2.93877	2.94595	3.12469	3.09904	2.92332	0.110576
		-117.9	3.50359	2.50391	3.01259	3.13668	3.03919	0.206639			-117.9	2.49619	2.95124	3.00334	3.20282	3.03444	2.9376	0.118126
		-117.8	3.50229	2.47553	3.05846	3.16352	3.04995	0.213608			-117.8	2.4979	2.98121	2.94594	3.1179	3.15072	2.93873	0.116882
		-117.7	3.45925	2.44199	2.95909	3.12014	2.99512	0.211796			-117.7	2.52182	2.96702	2.98613	3.17567	3.09644	2.94941	0.113424
		-117.6	3.46316	2.52196	3.0075	3.11395	3.02664	0.194347			-117.6	2.49961	2.94753	2.99473	3.17227	3.05252	2.93333	0.114758
		-117.5	3.52185	2.47037	2.96164	3.18416	3.03451	0.220503			-117.5	2.50131	2.93882	3.0263	3.19943	3.21531	2.97623	0.129697
		-117.4	3.51664	2.53744	2.96418	3.13046	3.03718	0.202825			-117.4	2.47909	2.95463	2.94594	3.21302	3.16105	2.95075	0.129521
		-117.3	3.50099	2.45488	2.92341	3.21099	3.02257	0.222951			-117.3	2.53893	2.88752	3.01195	3.15527	3.02153	2.92304	0.104961
		-117.2	3.50358	2.48069	3.0661	3.16558	3.05399	0.2128			-117.2	2.51158	2.95664	2.98326	3.07716	3.10678	2.92708	0.107584
		-117.1	3.48664	2.48068	2.9387	3.12841	3.00861	0.209457			-117.1	2.4825	2.88938	3.00621	3.16207	3.18688	2.94541	0.127744
		-117	3.5362	2.50133	2.98966	3.19655	3.05594	0.216488			-117	2.52697	2.94575	3.00046	3.19604	3.0732	2.94848	0.113407
		-116.9	3.48143	2.46262	2.98713	3.15731	3.02212	0.212821			-116.9	2.52697	2.96925	2.92873	3.19265	3.14296	2.95211	0.117445
		-116.8	3.47229	2.47552	2.93616	3.14493	3.00722	0.208768			-116.8	2.57313	2.90361	2.94595	3.16548	3.0887	2.93537	0.102177
		-116.7	3.50229	2.43167	2.92597	3.17177	3.00793	0.225468			-116.7	2.52696	2.92821	2.9689	3.16208	3.1533	2.94789	0.115343
		-116.6	3.51794	2.53229	2.96418	3.11188	3.03157	0.203477			-116.6	2.4962	2.94623	2.95169	3.19265	3.16879	2.95111	0.12504
		-116.5	3.55576	2.49874	2.99221	3.14906	3.04894	0.218485			-116.5	2.48594	2.89978	3.00046	3.17227	3.07061	2.92581	0.118626
		-116.4	3.48273	2.48584	2.98456	3.13253	3.02142	0.206834			-116.4	2.5509	2.97073	2.90578	3.20283	3.06027	2.9381	0.108867
		-116.3	3.45794	2.45231	2.954	3.15525	3.00487	0.211306			-116.3	2.47395	2.90179	3.00621	3.11451	3.17396	2.93409	0.124109
		-116.2	3.51662	2.57098	3.05336	3.18416	3.08128	0.196065			-116.2	2.53209	2.9513	2.91438	3.11112	3.13264	2.92831	0.107908
		-116.1	3.58446	2.47553	2.96418	3.13046	3.03866	0.228945			-116.1	2.51671	2.94773	2.9775	3.15867	3.1042	2.94096	0.113007
		-116	3.40317	2.43682	2.96673	3.17177	2.99462	0.206197			-116	2.51499	2.90322	3.01195	3.13148	3.06545	2.92542	0.109202
		-115.9	3.50099	2.55292	3.0024	3.08917	3.03637	0.194409			-115.9	2.55946	2.94102	2.96031	3.11112	3.12489	2.93936	0.102149
		-115.8	3.55576	2.4781	3.04573	3.15112	3.05768	0.222275			-115.8	2.46882	2.9528	2.9603	3.15527	3.11196	2.92983	0.122061
		-115.7	3.53098	2.44457	2.97693	3.0995	3.01299	0.223643			-115.7	2.54406	2.94582	2.98326	3.06355	3.08354	2.92405	0.098302
		-115.6	3.52185	2.45488	2.99986	3.10362	3.02005	0.219585			-115.6	2.51158	2.914	2.92874	3.03977	3.1068	2.90018	0.103488
		-115.5	3.5049	2.49101	2.99732	3.15733	3.03764	0.21077			-115.5	2.50645	2.94445	3.02629	3.13489	3.09645	2.94171	0.11355
		-115.4	3.54663	2.52196	2.95145	3.17797	3.0495	0.214391			-115.4	2.54064	2.87346	3.0177	3.1111	3.0887	2.92632	0.104976
		-115.3	3.55446	2.47036	2.9489	3.12635	3.02502	0.224353			-115.3	2.50816	2.92653	2.90004	3.07714	3.05512	2.8934	0.102339
		-115.2	3.52838	2.4394	2.96674	3.12634	3.01521	0.225388			-115.2	2.57314	3.00614	3.02056	3.11792	3.09646	2.96285	0.0997446
		-115.1	3.51143	2.47294	3.01004	3.10983	3.02606	0.213853			-115.1	2.53552	2.89463	2.96604	3.08055	3.07061	2.90947	0.0996234
		-115	3.58446	2.52454	2.98966	3.14699	3.06141	0.218761			-115	2.52184	2.96908	2.96891	3.10092	3.04477	2.92111	0.102867
		-114.9	3.48403	2.53229	2.96419	3.1408	3.03033	0.198005			-114.9	2.53893	2.92282	2.97464	3.07714	3.06028	2.91476	0.0980925
		-114.8	3.52446	2.47294	2.98713	3.13461	3.02979	0.217483			-114.8	2.53039	2.91412	3.01769	3.10433	3.12229	2.93776	0.108326
		-114.7	3.5036	2.52712	2.97184	3.09742	3.025	0.201041			-114.7	2.54748	2.90124	2.99761	3.02278	3.17915	2.92965	0.105452
		-114.6	3.58706	2.48843	2.97693	3.16352	3.05399	0.227662			-114.6	2.52696	2.91032	3.01195	3.1281	3.13005	2.94148	0.111389
		-114.5	3.55576	2.55034	2.99986	3.16765	3.0684	0.208259			-114.5	2.47054	2.97973	3.04351	3.09074	3.09387	2.93568	0.118108
		-114.4	3.51924	2.48069	2.96928	3.1408	3.0275	0.215453			-114.4	2.50645	2.90535	3.00047	3.09753	3.08353	2.91867	0.10862
		-114.3	3.56097	2.50132	3.0075	3.16765	3.05936	0.219363			-114.3	2.55603	2.90515	3.02055	3.1383	3.06545	2.93709	0.102507
		-114.2	3.55968	2.54002	2.96928	3.17383	3.0607	0.212376			-114.2	2.53723	2.89983	2.98898	3.13488	3.11971	2.93613	0.108729
		-114.1	3.53098	2.49874	2.97692	3.16557	3.04305	0.214811			-114.1	2.5321	2.95688	3.055	3.15188	3.03702	2.94658	0.108162
		-114	3.60402	2.53485	3.00496	3.18004	3.08097	0.22125			-114	2.57655	2.93874	2.92586	3.09753	3.11455	2.93065	0.0967321
		-113.9	3.54142	2.45746	3.03045	3.20069	3.0575	0.22647			-113.9	2.57484	2.91574	2.97751	3.1315	3.09129	2.93818	0.0987126
		-113.8	3.56097	2.52196	2.95399	3.1408	3.04443	0.215496			-113.8	2.515	2.92304	3.01769	3.16885	3.07062	2.93904	0.113221
		-113.7	3.51273	2.49358	2.97947	3.20481	3.04765	0.2146			-113.7	2.58682	2.91599	2.98325	3.07716	3.10161	2.93296	0.0927004
		-113.6	3.53229	2.48584	3.02789	3.17383	3.05496	0.217295			-113.6	2.53893	2.86242	3.00335	3.22322	3.09646	2.94488	0.117359
		-113.5	3.52968	2.50133	2.96927	3.14287	3.03579	0.213203			-113.5	2.60905	2.87742	2.98613	3.08734	3.07061	2.92611	0.0875724
		-113.4	3.57923	2.50648	2.97948	3.1697	3.05872	0.222579			-113.4	2.49106	2.9404	2.9603	3.09751	3.10678	2.91921	0.112345
		-113.3	3.53359	2.46779	2.98203	3.16351	3.03673	0.221665			-113.3	2.51842	2.90528	2.94594	3.13149	3.09387	2.919	0.108884
		-113.2	3.52447	2.47554	2.98457	3.10776	3.02309	0.215994			-113.2	2.4808	2.87496	2.94307	3.13489	3.02151	2.89105	0.111299
		-113.1	3.54794	2.44974	2.99476	3.18829	3.04518	0.229191			-113.1	2.54919	2.91057	3.0177	3.16208	3.08354	2.94461	0.107109
		-113	3.5349	2.43941	3.02534	3.15526	3.03873	0.227143			-113	2.50131	2.90511	2.96889	3.15527	3.05512	2.91714	0.112134
		-112.9	3.51272	2.46521	2.96418	3.12015	3.01556	0.216724			-112.9	2.52355	2.90002	2.95455	3.05677	3.13521	2.91402	0.105738
		-112.8	3.53881	2.45231	2.9973	3.16763	3.03901	0.225886			-112.8	2.51329	2.91209	2.92301	3.15189	3.08354	2.91676	0.110895
		-112.7	3.53097	2.49874	2.98202	3.15525	3.04174	0.214214			-112.7	2.55091	2.92989	2.95456	3.16886	3.06803	2.93445	0.104958
		-112.6	3.52708	2.47809	2.93871	3.11395	3.01446	0.217199			-112.6	2.47737	2.95655	2.92873	3.15529	3.08871	2.92133	0.118563
		-112.5	3.4136	2.55034	2.91832	3.13874	3.00525	0.182363			-112.5	2.53893	2.90875	2.96029	3.09752	3.11712	2.92452	0.104219
		-112.4	3.51402	2.49616	3.0024	3.1759	3.04712	0.212159			-112.4	2.55262	2.93179	2.9316	3.19604	3.07061	2.93653	0.107878
		-112.3	3.48273	2.45231	2.97693	3.16351	3.01887	0.2158			-112.3	2.49276	2.90843	2.98038	3.09414	3.06546	2.90823	0.108881
		-112.2	3.55445	2.48327	2.95145	3.18003	3.0423	0.223986			-112.2	2.47567	2.92294	3.00048	3.23342	3.07578	2.94166	0.127292
		-112.1	3.54011	2.48069	2.91578	3.12222	3.0147	0.220336			-112.1	2.55775	2.94957	2.95455	3.10091	3.06545	2.92565	0.0967009
		-112	3.50099	2.43682	3.01004	3.15526	3.02578	0.221681			-112	2.48764	2.8964	2.96316	3.11791	3.11196	2.91541	0.115167
		-111.9	3.52967	2.46263	3.01005	3.21926	3.0554	0.224578			-111.9	2.52868	2.98478	2.89429	3.1315	3.12746	2.93334	0.11065
		-111.8	3.48143	2.57614	2.9336	3.15525	3.03661	0.190303			-111.8	2.53381	2.92466	2.9402	3.11111	3.09904	2.92177	0.104436
		-111.7	3.54011	2.44198	2.94635	3.15526	3.02092	0.228824			-111.7	2.55604	2.94427	2.9689	3.10092	3.14039	2.94211	0.103516
		-111.6	3.48404	2.52454	3.02279	3.1821	3.05337	0.20055			-111.6	2.47054	2.90839	3.00334	3.12471	3.13005	2.9274	0.121417
		-111.5	3.56489	2.48326	2.93616	3.1821	3.0416	0.226648			-111.5	2.58339	2.90547	2.94308	3.09753	3.08871	2.92364	0.0932631
		-111.4	3.47751	2.47553	2.9387	3.24405	3.03395	0.216371			-111.4	2.49448	2.92608	2.95743	3.19605	3.11454	2.93772	0.121447
		-111.3	3.55445	2.48842	2.98711	3.13254	3.04063	0.219897			-111.3	2.55945	2.93152	2.96029	3.12471	3.09388	2.93397	0.100726
		-111.2	3.48142	2.58388	2.95145	3.1821	3.04971	0.18942			-111.2	2.54577	2.99369	2.9689	3.15189	3.11712	2.95547	0.108214
		-111.1	3.53359	2.5168	2.954	3.14906	3.03836	0.211473			-111.1	2.568	2.9212	2.94596	3.10431	3.07321	2.92254	0.0953912
		-111	3.55053	2.48067	2.98966	3.14905	3.04248	0.22134			-111	2.43292	2.93319	2.94019	3.15527	3.14814	2.92194	0.13138
		-110.9	3.50098	2.45231	2.93616	3.22753	3.02925	0.224235			-110.9	2.54748	2.95312	2.96603	3.17906	3.07838	2.94481	0.107495
		-110.8	3.46968	2.56324	3.0075	3.17589	3.05408	0.189441			-110.8	2.55946	2.97251	2.93161	3.11451	3.04219	2.92406	0.0963231
		-110.7	3.49185	2.46262	2.95654	3.14079	3.01295	0.214425			-110.7	2.55774	2.92659	2.97177	3.1111	3.13005	2.93945	0.103127
		-110.6	3.4736	2.45231	2.95655	3.1883	3.01769	0.216095			-110.6	2.5509	2.90547	2.92299	3.16547	3.04478	2.91792	0.103019
		-110.5	3.52578	2.55034	2.94635	3.13253	3.03875	0.202706			-110.5	2.52868	2.93184	3.01195	3.14849	3.13006	2.9502	0.112582
		-110.4	3.49186	2.50648	3.0177	3.1697	3.04644	0.20534			-110.4	2.47909	2.90359	2.9689	3.17905	3.08096	2.92232	0.120426
		-110.3	3.47881	2.54776	2.98713	3.20068	3.05359	0.196369			-110.3	2.47909	2.94936	3.00334	3.10092	3.13521	2.93358	0.118393
		-110.2	3.41882	2.45231	3.03553	3.11602	3.00567	0.202066			-110.2	2.49619	2.90504	2.93447	3.10771	3.08354	2.90539	0.109763
		-110.1	3.54402	2.54002	3.01259	3.14286	3.05987	0.206914			-110.1	2.5355	2.9037	2.95742	3.13489	3.10163	2.92663	0.106877
		-110	3.49577	2.46004	3.01259	3.12428	3.02317	0.214243			-110	2.4637	2.93716	2.95742	3.2504	3.10422	2.94258	0.132375
		-109.9	3.45143	2.54776	2.93106	3.19242	3.03067	0.192857			-109.9	2.5492	2.92645	2.94881	3.13149	3.07578	2.92635	0.101773
		-109.8	3.4423	2.5168	3.00495	3.15112	3.02879	0.193361			-109.8	2.49276	2.97235	2.95743	3.1315	3.10162	2.93113	0.114841
		-109.7	3.49446	2.48326	2.99221	3.14493	3.02872	0.210014			-109.7	2.54748	2.92103	3.03203	3.18926	3.08096	2.95415	0.110432
		-109.6	3.44882	2.54518	2.96674	3.14699	3.02693	0.188882			-109.6	2.52697	2.96195	2.90292	3.18245	3.13263	2.94138	0.115831
		-109.5	3.52969	2.50131	2.98203	3.10362	3.02916	0.211525			-109.5	2.51671	2.96894	3.00046	3.11452	3.07838	2.9358	0.107978
		-109.4	3.4449	2.51164	3.06356	3.17797	3.04952	0.196285			-109.4	2.53894	2.93722	2.94308	3.13149	3.13521	2.93719	0.108537
		-109.3	3.49838	2.45231	2.97692	3.18417	3.02795	0.219786			-109.3	2.49789	2.96691	2.99472	3.1417	3.02152	2.92455	0.110751
		-109.2	3.51403	2.48585	2.99221	3.12015	3.02806	0.212118			-109.2	2.48935	2.94048	2.92585	3.09753	3.15588	2.92182	0.116843
		-109.1	3.5049	2.44715	2.93871	3.11807	3.00221	0.219515			-109.1	2.54749	2.97587	2.99188	3.16207	3.06544	2.94855	0.105529
		-109	3.5023	2.49616	2.96165	3.16145	3.03039	0.210159			-109	2.49447	2.89646	2.93734	3.17227	3.12746	2.9256	0.120094
		-108.9	3.58577	2.47809	3.00495	3.12221	3.04776	0.22755			-108.9	2.51329	2.98657	2.9804	3.15528	3.11971	2.95105	0.114873
		-108.8	3.48273	2.48585	3.02024	3.147	3.03396	0.207121			-108.8	2.50131	2.9459	2.93733	3.07034	3.06546	2.90407	0.104585
		-108.7	3.53359	2.48584	2.94634	3.10983	3.0189	0.216525			-108.7	2.5663	2.99362	3.00335	3.22322	3.12488	2.98227	0.11225
		-108.6	3.52185	2.49875	2.97183	3.19861	3.04776	0.214999			-108.6	2.46711	2.89278	2.94595	3.16885	3.14038	2.92301	0.125891
		-108.5	3.4749	2.442	2.98456	3.1697	3.01779	0.216923			-108.5	2.49447	2.92325	2.95169	3.19605	3.09387	2.93187	0.119962
		-108.4	3.48533	2.52454	3.0126	3.13254	3.03875	0.198605			-108.4	2.5338	2.92786	2.97465	3.19944	3.11197	2.94954	0.114625
		-108.3	3.5036	2.42134	2.95654	3.18415	3.01641	0.227885			-108.3	2.49448	2.96718	2.94881	3.07374	3.14814	2.92647	0.113929
		-108.2	3.49707	2.48842	2.99221	3.18003	3.03943	0.211158			-108.2	2.60562	2.93006	2.96316	3.17567	3.14297	2.96349	0.101593
		-108.1	3.47229	2.43425	2.96418	3.13667	3.00185	0.216618			-108.1	2.46711	2.96361	2.93448	3.11111	3.1197	2.9192	0.119084
		-108	3.45795	2.49617	2.95908	3.16351	3.01918	0.202176			-108	2.57997	2.90866	2.96603	3.18586	3.13521	2.95515	0.106931
		-107.9	3.51012	2.55034	3.01768	3.13046	3.05215	0.197666			-107.9	2.4979	2.95659	2.97178	3.15188	3.12488	2.9406	0.117433
		-107.8	3.55706	2.47553	2.9336	3.14698	3.02829	0.22513			-107.8	2.49619	2.88579	2.97465	3.14168	3.06287	2.91223	0.112478
		-107.7	3.54271	2.43424	2.97437	3.12221	3.01838	0.228921			-107.7	2.49447	2.94604	2.95169	3.19605	3.17139	2.95193	0.125908
		-107.6	3.54663	2.51164	2.9922	3.17177	3.05556	0.214965			-107.6	2.52012	2.93562	2.92585	3.13149	3.1714	2.9369	0.115473
		-107.5	3.47099	2.55033	2.98966	3.14286	3.03846	0.191189			-107.5	2.49276	2.93014	2.94883	3.18926	3.14813	2.94182	0.123618
		-107.4	3.51924	2.53744	2.94381	3.14079	3.03532	0.204443			-107.4	2.51842	2.91765	2.93734	3.13488	3.13265	2.92819	0.11239
		-107.3	3.5362	2.44198	2.99477	3.21721	3.04754	0.230408			-107.3	2.50986	2.8913	2.96029	3.12471	3.20756	2.93874	0.12114
		-107.2	3.56097	2.42393	2.96418	3.14286	3.02299	0.235607			-107.2	2.59024	2.91741	3.06074	3.17566	3.09388	2.96759	0.103157
		-107.1	3.51011	2.52712	3.00496	3.24817	3.07259	0.209038			-107.1	2.50473	2.94778	2.94882	3.08394	3.12228	2.92151	0.109962
		-107	3.52577	2.49358	3.01004	3.11396	3.03584	0.212297			-107	2.54918	2.91046	2.98899	3.15187	3.05255	2.93061	0.103229
		-106.9	3.55316	2.50906	2.97439	3.22132	3.06448	0.219851			-106.9	2.52868	2.96014	2.97176	3.16546	3.16105	2.95742	0.115926
		-106.8	3.51663	2.50648	2.99986	3.10982	3.0332	0.20779			-106.8	2.46541	2.90178	2.96603	3.09753	3.10679	2.90751	0.117202
		-106.7	3.49577	2.47036	2.954	3.16145	3.02039	0.214637			-106.7	2.5663	2.97436	3.00046	3.12469	3.15072	2.9633	0.104949
		-106.6	3.5649	2.49617	3.02789	3.1759	3.06622	0.221198			-106.6	2.46711	2.94589	2.94021	3.1281	3.10422	2.91711	0.119035
		-106.5	3.55707	2.46263	3.0075	3.18003	3.05181	0.227455			-106.5	2.54749	2.88401	2.98614	3.15867	3.08095	2.93145	0.106454
		-106.4	3.4762	2.44199	2.97438	3.12015	3.00318	0.214707			-106.4	2.49276	2.95141	3.02918	3.09412	3.09387	2.93227	0.112967
		-106.3	3.50229	2.57872	2.954	3.1057	3.03518	0.191075			-106.3	2.50644	2.93031	2.97177	3.1315	3.09386	2.92678	0.111478
		-106.2	3.50359	2.50647	3.03297	3.14286	3.04647	0.206161			-106.2	2.56288	2.92637	2.98613	3.12131	3.17397	2.95413	0.107507
		-106.1	3.49446	2.49358	2.94381	3.13254	3.0161	0.208294			-106.1	2.54065	2.9139	2.97751	3.06016	3.06028	2.9105	0.0964676
		-106	3.50621	2.43683	3.01515	3.15112	3.02733	0.22239			-106	2.49276	2.91585	3.00334	3.06354	3.11455	2.91801	0.111339
		-105.9	3.51532	2.50648	2.92851	3.15319	3.02588	0.211151			-105.9	2.50987	2.95336	3.03777	3.03977	3.08096	2.92435	0.105676
		-105.8	3.5662	2.52454	2.96163	3.13461	3.04675	0.215541			-105.8	2.4979	2.94743	3.04352	3.11452	3.09904	2.94048	0.114449
		-105.7	3.51533	2.491	2.99731	3.17383	3.04437	0.213502			-105.7	2.53381	2.90854	2.98612	3.09073	3.11454	2.92675	0.104979
		-105.6	3.52707	2.50648	2.99221	3.16144	3.0468	0.211882			-105.6	2.51499	2.89472	3.00909	3.15528	3.03962	2.92274	0.110055
		-105.5	3.50359	2.50907	2.95654	3.12013	3.02234	0.20594			-105.5	2.56116	2.946	3.04065	3.11112	3.11195	2.95418	0.102842
		-105.4	3.54533	2.50131	2.98203	3.21308	3.06044	0.219314			-105.4	2.60391	2.88246	2.96317	3.12471	3.10937	2.93672	0.094751
		-105.3	3.45534	2.58645	2.98203	3.15112	3.04373	0.181168			-105.3	2.55261	2.88544	2.94882	3.12471	3.07838	2.91799	0.100986
		-105.2	3.57664	2.5555	3.02024	3.16764	3.08001	0.210751			-105.2	2.53551	2.90695	2.99473	3.07036	3.08871	2.91925	0.101157
		-105.1	3.51402	2.51937	2.94126	3.21101	3.04641	0.211064			-105.1	2.54064	2.89469	2.90864	3.11451	3.16364	2.92442	0.10995
		-105	3.54012	2.49358	2.96928	3.15319	3.03904	0.217276			-105	2.66717	2.86787	2.98039	3.20284	3.13006	2.96967	0.0954137
		-104.9	3.52315	2.47553	2.98712	3.11808	3.02597	0.216058			-104.9	2.48764	2.95137	3.02918	3.09753	3.13005	2.93915	0.11697
		-104.8	3.55184	2.54776	2.98711	3.19242	3.06978	0.209516			-104.8	2.51158	2.91762	2.9316	3.13489	3.10679	2.9205	0.11136
		-104.7	3.57794	2.57612	3.01514	3.19036	3.08989	0.207732			-104.7	2.48592	2.94585	3.00909	3.08054	3.09386	2.92305	0.112468
		-104.6	3.54924	2.50133	2.96674	3.14286	3.04004	0.217072			-104.6	2.47738	2.88597	2.97465	3.09753	3.0887	2.90485	0.113773
		-104.5	3.50228	2.47037	2.96929	3.18829	3.03256	0.216977			-104.5	2.55774	2.88023	2.92873	3.1349	3.1869	2.9377	0.111522
		-104.4	3.53881	2.48842	2.98457	3.1821	3.04848	0.219094			-104.4	2.50303	2.88593	2.97751	3.1213	3.1223	2.92201	0.113965
		-104.3	3.60792	2.49099	2.99986	3.14906	3.06196	0.230131			-104.3	2.46027	2.89972	2.91438	3.15189	3.11971	2.90919	0.123464
		-104.2	3.44751	2.47296	2.95145	3.16558	3.00938	0.205641			-104.2	2.48592	2.94414	2.97752	3.09753	3.1042	2.92186	0.113523
		-104.1	3.57925	2.42909	3.01259	3.18417	3.05127	0.238926			-104.1	2.59365	2.93172	2.9517	3.10092	3.08871	2.93334	0.0916392
		-104	3.46707	2.51423	3.00494	3.13461	3.03021	0.197615			-104	2.47567	2.91954	2.96316	3.21303	3.1042	2.93512	0.126084
		-103.9	3.58054	2.53745	2.8903	3.15112	3.03985	0.219753			-103.9	2.52868	2.91057	3.00046	3.10092	3.06544	2.92121	0.103338
		-103.8	3.4462	2.4265	2.95144	3.19241	3.00414	0.21743			-103.8	2.5475	2.91573	2.91437	3.10432	3.14038	2.92446	0.105178
		-103.7	3.54924	2.50906	3.03553	3.19242	3.07156	0.216119			-103.7	2.568	2.9424	2.94594	3.10433	3.03186	2.91851	0.0926173
		-103.6	3.55968	2.50391	2.98203	3.10776	3.03834	0.217064			-103.6	2.51156	2.92144	2.9316	3.15527	3.0577	2.91552	0.109811
		-103.5	3.54794	2.4781	2.93361	3.15319	3.02821	0.223104			-103.5	2.55775	2.92254	2.96029	3.18925	3.08353	2.94267	0.107127
		-103.4	3.56229	2.47294	2.98202	3.15524	3.04312	0.225638			-103.4	2.42608	2.92823	2.97463	3.14509	3.11973	2.91875	0.129915
		-103.3	3.50229	2.47811	2.94126	3.0933	3.00374	0.211494			-103.3	2.55432	2.96912	2.94594	3.11452	3.1042	2.93762	0.10174
		-103.2	3.5362	2.49358	2.98712	3.19861	3.05388	0.218323			-103.2	2.5834	2.94755	2.92299	3.16548	3.08095	2.94007	0.0995535
		-103.1	3.58576	2.46005	3.0126	3.147	3.05135	0.231998			-103.1	2.5338	2.88927	2.94309	3.08394	3.10421	2.91086	0.102718
		-103	3.49968	2.40844	2.99731	3.11808	3.00588	0.226097			-103	2.5492	2.94924	3.02342	3.10772	3.10937	2.94779	0.10399
		-102.9	3.46577	2.56839	2.92851	3.22547	3.04703	0.193718			-102.9	2.47396	2.94052	2.90864	3.14508	3.05511	2.90466	0.115595
		-102.8	3.48012	2.45746	3.05082	3.10362	3.023	0.211358			-102.8	2.51159	2.90876	2.98038	3.12131	3.09904	2.92421	0.110242
		-102.7	3.53099	2.47552	2.98201	3.17797	3.04162	0.220246			-102.7	2.54236	2.94408	2.92298	3.09753	3.09645	2.92068	0.101453
		-102.6	3.47489	2.45747	3.00241	3.09537	3.00754	0.209909			-102.6	2.57483	2.93859	2.94021	3.18924	3.08095	2.94477	0.103735
		-102.5	3.50751	2.47552	2.89794	3.19037	3.01783	0.219475			-102.5	2.47396	2.96185	2.93734	3.12469	3.03186	2.90594	0.112789
		-102.4	3.49447	2.51939	3.01515	3.19243	3.05536	0.204224			-102.4	2.53722	2.88946	2.9316	3.12471	3.13005	2.92261	0.108069
		-102.3	3.49577	2.54518	2.95654	3.19655	3.04851	0.200781			-102.3	2.50815	2.93346	2.86559	3.1315	3.04995	2.89773	0.10768
		-102.2	3.50621	2.47811	2.96165	3.16557	3.02788	0.21494			-102.2	2.50815	2.96177	2.95169	3.11452	3.15329	2.93788	0.11468
		-102.1	3.48664	2.53227	2.9973	3.14079	3.03925	0.197749			-102.1	2.49961	2.95655	2.97465	3.1383	3.08871	2.93156	0.113248
		-102	3.46577	2.57872	3.0075	3.17383	3.05646	0.185279			-102	2.5167	2.90536	2.91152	3.09753	3.06028	2.89828	0.102901
		-101.9	3.49316	2.41619	3.0075	3.11395	3.0077	0.223018			-101.9	2.49961	2.94064	2.89429	3.15189	3.11196	2.91968	0.115853
		-101.8	3.46317	2.49101	3.02789	3.22546	3.05188	0.207051			-101.8	2.53722	2.96886	3.00907	3.13488	3.06804	2.94361	0.10539
		-101.7	3.54011	2.47295	2.97692	3.14493	3.03373	0.221074			-101.7	2.49105	2.85765	2.9603	3.15188	3.07062	2.9063	0.115114
		-101.6	3.48012	2.49617	3.05847	3.13666	3.04285	0.203942			-101.6	2.54237	3.00249	2.90864	3.14509	3.09904	2.93953	0.107321
		-101.5	3.53098	2.51938	3.02533	3.15317	3.05722	0.208955			-101.5	2.52354	2.95664	3.03778	3.09752	3.12747	2.94859	0.110197
		-101.4	3.36926	2.5426	2.98203	3.14286	3.00919	0.174634			-101.4	2.52356	2.89299	2.91725	3.17226	3.08871	2.91895	0.111802
		-101.3	3.54663	2.50131	3.01515	3.14493	3.05201	0.215621			-101.3	2.45686	2.90603	2.92011	3.12811	3.10937	2.9041	0.120955
		-101.2	3.43709	2.48842	3.05081	3.10982	3.02154	0.196966			-101.2	2.55261	2.99734	2.92585	3.15866	3.21789	2.97047	0.117036
		-101.1	3.54923	2.48069	2.95654	3.13254	3.02975	0.221219			-101.1	2.53894	2.96203	2.92873	3.05677	3.01376	2.90005	0.0928853
		-101	3.45012	2.54259	3.00495	3.19862	3.04907	0.191849			-101	2.47396	2.95632	2.9976	3.17227	3.10679	2.94139	0.122991
		-100.9	3.52576	2.47295	2.95654	3.09329	3.01213	0.216836			-100.9	2.59365	2.91774	2.9115	3.11111	3.11712	2.93023	0.0952469
		-100.8	3.47229	2.48069	3.0228	3.1573	3.03327	0.206878			-100.8	2.50302	2.9566	2.9976	3.12471	3.08871	2.93413	0.111938
		-100.7	3.52185	2.4523	2.96928	3.1408	3.02106	0.22198			-100.7	2.47908	2.92126	2.90864	3.1281	3.02928	2.89327	0.110954
		-100.6	3.43968	2.48843	3.02788	3.11188	3.01697	0.197308			-100.6	2.52867	2.96362	2.94308	3.14169	3.08354	2.93212	0.107408
		-100.5	3.46838	2.48068	2.96418	3.10983	3.00577	0.20459			-100.5	2.49106	2.96008	2.98611	3.16887	3.16363	2.95395	0.123591
		-100.4	3.48142	2.49358	3.01259	3.1697	3.03932	0.206358			-100.4	2.49619	2.87537	2.98613	3.11111	3.09904	2.91357	0.112773
		-100.3	3.48664	2.52196	2.95145	3.12841	3.02211	0.200463			-100.3	2.59536	2.92316	2.95455	3.17227	3.02411	2.93389	0.0948957
		-100.2	3.47883	2.43941	3.03809	3.1635	3.02996	0.217587			-100.2	2.50987	3.00284	2.9689	3.14169	3.07578	2.93982	0.11156
		-100.1	3.47099	2.45747	3.00749	3.0871	3.00576	0.208902			-100.1	2.49106	2.92445	2.84263	3.17228	3.09387	2.90486	0.118896
		-100	3.4723	2.43424	2.99477	3.11395	3.00382	0.215273			-100	2.56629	2.98513	3.01483	3.09753	3.07321	2.9474	0.0973606
		-99.9	3.39664	2.47811	3.01005	3.11602	3.0002	0.192192			-99.9	2.5851	2.91737	2.91725	3.16206	3.15847	2.94805	0.105759
		-99.8	3.56749	2.56582	2.96674	3.16764	3.06692	0.208538			-99.8	2.50131	2.92624	3.02342	3.16548	3.12747	2.94878	0.119415
		-99.7	3.43317	2.41361	3.02533	3.13459	3.00168	0.214132			-99.7	2.54406	2.93186	2.97752	3.14849	3.08096	2.93658	0.105243
		-99.6	3.49577	2.46261	2.96675	3.16764	3.02319	0.216338			-99.6	2.55774	2.91585	2.96891	3.15188	3.14296	2.94747	0.108015
		-99.5	3.46447	2.51165	2.95399	3.14698	3.01927	0.199258			-99.5	2.52696	2.91581	2.96603	3.15528	3.05253	2.92332	0.107117
		-99.4	3.52055	2.50647	3.03298	3.10774	3.04194	0.208207			-99.4	2.50817	2.9793	2.92298	3.15866	3.13264	2.94035	0.116884
		-99.3	3.4723	2.58645	2.98713	3.19862	3.06112	0.186806			-99.3	2.49105	2.91249	2.94594	3.20283	3.09904	2.93027	0.121707
		-99.2	3.51794	2.491	2.98967	3.16971	3.04208	0.213926			-99.2	2.45344	2.96191	3.01768	3.12811	3.10679	2.93359	0.123744
		-99.1	3.45273	2.47551	3.02788	3.16352	3.02991	0.204937			-99.1	2.48934	2.8717	2.94308	3.17905	3.08096	2.91283	0.118552
		-99	3.4449	2.55809	2.99477	3.1697	3.04187	0.185975			-99	2.52697	2.96924	2.98898	3.1281	3.06287	2.93523	0.105881
		-98.9	3.43708	2.44714	2.97439	3.15112	3.00243	0.2082			-98.9	2.57655	2.88767	2.96316	3.2436	3.11713	2.95762	0.113437
		-98.8	3.50229	2.48068	3.00241	3.15525	3.03516	0.212359			-98.8	2.53723	2.88395	2.92298	3.12471	3.09387	2.91255	0.104805
		-98.7	3.50751	2.51163	2.99475	3.16766	3.04539	0.207357			-98.7	2.49789	2.92312	2.96315	3.23341	3.14297	2.95211	0.127049
		-98.6	3.45794	2.52455	3.03043	3.16558	3.04463	0.194967			-98.6	2.54406	2.94749	3.00621	3.13151	3.15589	2.95703	0.110237
		-98.5	3.47622	2.49615	2.96418	3.16145	3.0245	0.205262			-98.5	2.4996	2.93212	2.96316	3.21984	2.99051	2.92105	0.116965
		-98.4	3.46707	2.4781	3.05845	3.10363	3.02681	0.204494			-98.4	2.52012	2.90502	3.05212	3.14509	3.1533	2.95513	0.117581
		-98.3	3.55837	2.48327	2.90557	3.17591	3.03078	0.226359			-98.3	2.49276	2.93534	2.94308	3.11452	3.10422	2.91798	0.112927
		-98.2	3.45534	2.49099	3.00496	3.10982	3.01528	0.199495			-98.2	2.53381	2.93544	2.98325	3.17566	3.14813	2.95526	0.115015
		-98.1	3.54924	2.46778	3.01514	3.14905	3.0453	0.22345			-98.1	2.49447	2.93544	2.93733	3.16886	3.12746	2.93271	0.119536
		-98	3.46447	2.50132	2.97183	3.11602	3.01341	0.199571			-98	2.5167	2.91228	2.96316	3.16547	3.1378	2.93908	0.116284
		-97.9	3.5062	2.50647	2.90559	3.1635	3.02044	0.210907			-97.9	2.56288	2.97776	2.98898	3.09412	3.10938	2.94662	0.0995669
		-97.8	3.56097	2.48326	2.96165	3.20688	3.05319	0.226322			-97.8	2.51158	2.93891	2.96604	3.09073	3.07061	2.91557	0.105124
		-97.7	3.51794	2.46778	2.97183	3.12841	3.02149	0.217363			-97.7	2.50132	2.99554	2.923	3.13149	3.0267	2.91561	0.108863
		-97.6	3.50099	2.52454	3.03044	3.12428	3.04506	0.201101			-97.6	2.4979	2.93003	2.98325	3.04997	3.13265	2.91876	0.110538
		-97.5	3.52055	2.54259	2.96928	3.15526	3.04692	0.203395			-97.5	2.48764	3.0241	2.98612	3.20624	3.05254	2.95133	0.121807
		-97.4	3.53229	2.47552	3.0177	3.10156	3.03177	0.216988			-97.4	2.55603	2.8822	2.97465	3.01938	3.02669	2.89179	0.0877975
		-97.3	3.48273	2.45747	3.00494	3.14906	3.02355	0.213579			-97.3	2.40043	2.93551	3.00621	3.12472	3.09129	2.91163	0.13201
		-97.2	3.54141	2.5555	2.98203	3.16971	3.06216	0.205014			-97.2	2.57314	2.9373	2.98612	3.1213	3.1223	2.94803	0.100623
		-97.1	3.52968	2.50647	3.04063	3.16557	3.06059	0.211839			-97.1	2.4962	2.89628	3.00621	3.15527	3.03444	2.91768	0.113143
		-97	3.5362	2.44199	2.95654	3.18828	3.03075	0.229571			-97	2.55261	2.92127	3.00907	3.15528	3.11971	2.95159	0.107972
		-96.9	3.5075	2.52453	3.04573	3.15319	3.05774	0.203276			-96.9	2.515	2.9564	3.01195	3.04996	3.00603	2.90787	0.0993371
		-96.8	3.53229	2.42136	2.96674	3.14286	3.01581	0.230701			-96.8	2.53039	2.91589	2.93735	3.20625	3.0551	2.929	0.112227
		-96.7	3.52577	2.42651	2.98713	3.12014	3.01489	0.227126			-96.7	2.51842	2.96199	3.07795	3.1281	3.11456	2.9602	0.114249
		-96.6	3.5362	2.5168	2.93616	3.22133	3.05262	0.2166			-96.6	2.49618	2.88236	2.98612	3.14169	3.10679	2.92263	0.116064
		-96.5	3.50229	2.5271	2.94635	3.10775	3.02087	0.201799			-96.5	2.57655	2.91411	3.08083	3.08054	3.08095	2.9466	0.0979799
		-96.4	3.59489	2.45489	2.9591	3.19862	3.05187	0.238292			-96.4	2.56801	2.91231	2.99187	3.17567	3.04737	2.93905	0.1022
		-96.3	3.48664	2.48843	3.07376	3.13459	3.04585	0.206894			-96.3	2.4996	2.95995	3.03777	3.09752	3.12746	2.94446	0.11484
		-96.2	3.5362	2.48326	2.98967	3.15526	3.0411	0.218324			-96.2	2.57655	2.87018	2.96316	3.10772	3.09129	2.92178	0.0966609
		-96.1	3.54793	2.52454	3.02279	3.15732	3.06314	0.211268			-96.1	2.52696	2.95443	2.95169	3.18925	3.1042	2.94531	0.113994
		-96	3.57402	2.49874	2.94379	3.19654	3.05327	0.225683			-96	2.49447	2.90675	3.01483	3.15869	3.0577	2.92649	0.115318
		-95.9	3.57793	2.52196	2.99221	3.13667	3.05719	0.217597			-95.9	2.54406	2.88764	3.04638	3.11452	3.03961	2.92644	0.102539
		-95.8	3.58445	2.49874	2.94635	3.23165	3.0653	0.229552			-95.8	2.50987	2.88603	3.01195	3.05336	3.12489	2.91722	0.108982
		-95.7	3.49577	2.56581	2.96929	3.14906	3.04498	0.193515			-95.7	2.52697	2.89621	3.00335	3.1417	3.11454	2.93655	0.111269
		-95.6	3.50881	2.49101	3.02279	3.14287	3.04137	0.210564			-95.6	2.57997	2.91621	3.04352	3.15867	3.0887	2.95742	0.102302
		-95.5	3.58967	2.48586	2.99477	3.21927	3.07239	0.230796			-95.5	2.54749	2.95117	2.989	3.10772	3.0732	2.93372	0.100564
		-95.4	3.49967	2.39555	3.02532	3.15939	3.01998	0.230845			-95.4	2.49789	2.9123	2.99473	3.08734	3.07062	2.91258	0.108222
		-95.3	3.61968	2.58388	2.98204	3.16351	3.08728	0.214814			-95.3	2.53894	2.89289	2.98039	3.15867	3.08096	2.93037	0.107686
		-95.2	3.50621	2.57356	2.97438	3.0995	3.03841	0.192085			-95.2	2.50303	2.9955	2.97752	3.12131	3.14814	2.9491	0.116451
		-95.1	3.54664	2.47036	2.97691	3.1697	3.04091	0.223973			-95.1	2.515	2.91225	2.98039	3.08734	3.08354	2.9157	0.105449
		-95	3.55054	2.43167	3.01259	3.16766	3.04061	0.232336			-95	2.56116	2.90871	2.94308	3.11452	3.13005	2.9315	0.102645
		-94.9	3.57402	2.51939	3.01513	3.15112	3.06491	0.217312			-94.9	2.4141	2.87492	3.0148	3.17905	3.14038	2.92465	0.138297
		-94.8	3.48404	2.50132	2.98712	3.12634	3.0247	0.203441			-94.8	2.53381	2.92807	3.00908	3.19605	3.10678	2.95476	0.114498
		-94.7	3.58315	2.48327	2.98456	3.10568	3.03917	0.225895			-94.7	2.5167	2.84682	2.92011	3.18586	3.11972	2.91784	0.118015
		-94.6	3.5349	2.45488	3.03552	3.16559	3.04772	0.224136			-94.6	2.53039	2.97073	2.95456	3.14507	3.11195	2.94254	0.109665
		-94.5	3.53881	2.4652	2.96164	3.12015	3.02145	0.221809			-94.5	2.43292	2.9617	2.92586	3.05676	3.08096	2.89164	0.118238
		-94.4	3.54402	2.53229	3.03807	3.26882	3.0958	0.214422			-94.4	2.6176	2.93714	2.88281	3.19946	3.0732	2.94204	0.0980459
		-94.3	3.52708	2.42652	2.90559	3.13873	2.99948	0.230009			-94.3	2.52183	2.90674	2.98039	3.14169	3.10163	2.93045	0.110443
		-94.2	3.54793	2.47553	2.95654	3.10983	3.02246	0.221216			-94.2	2.53722	2.89266	2.91437	3.18926	3.09645	2.92599	0.111972
		-94.1	3.52316	2.51164	2.9387	3.14081	3.02858	0.210655			-94.1	2.53893	2.92807	2.97464	3.13151	3.10163	2.93496	0.106036
		-94	3.55705	2.53228	2.97948	3.19448	3.06582	0.214085			-94	2.52356	2.93869	2.92586	3.14508	3.11455	2.92955	0.110817
		-93.9	3.36665	2.49874	2.99986	3.15937	3.00616	0.185054			-93.9	2.50815	2.92077	2.95169	3.17906	3.09904	2.93174	0.115996
		-93.8	3.53619	2.49102	2.92343	3.20068	3.03783	0.221167			-93.8	2.515	2.9971	2.93446	3.16548	3.05771	2.93395	0.111452
		-93.7	3.50228	2.5168	3.02533	3.17177	3.05404	0.204987			-93.7	2.48079	2.85932	2.9603	3.1281	3.09645	2.90499	0.116516
		-93.6	3.5062	2.50132	2.92087	3.15526	3.02091	0.210859			-93.6	2.52013	2.93854	2.9316	3.03299	3.21531	2.92771	0.114029
		-93.5	3.53359	2.49358	2.98712	3.15319	3.04187	0.215599			-93.5	2.60391	2.91592	2.98326	3.17906	3.08613	2.95366	0.0982284
		-93.4	3.55967	2.48068	2.93361	3.22339	3.04934	0.228673			-93.4	2.48593	2.91202	2.92585	3.12471	3.10678	2.91106	0.115088
		-93.3	3.46707	2.49874	3.02024	3.16557	3.03791	0.20238			-93.3	2.52354	2.97599	2.98325	3.1417	3.09387	2.94367	0.109749
		-93.2	3.49707	2.53744	2.99985	3.11808	3.03811	0.197732			-93.2	2.59023	3.01122	2.9402	3.13829	3.14039	2.96406	0.100993
		-93.1	3.47621	2.46005	2.94636	3.1759	3.01463	0.214337			-93.1	2.48592	2.90505	2.92585	3.1315	3.10161	2.90999	0.115302
		-93	3.52055	2.47037	2.96674	3.1408	3.02462	0.217942			-93	2.52526	2.95113	2.96604	3.1315	3.19465	2.95372	0.116917
		-92.9	3.5062	2.52454	3.03807	3.15938	3.05705	0.203334			-92.9	2.5167	2.90015	2.92873	3.08393	3.09645	2.90519	0.104888
		-92.8	3.51012	2.50132	2.97948	3.16352	3.03861	0.210178			-92.8	2.52011	2.91781	3.03777	3.11453	3.09387	2.93682	0.109646
		-92.7	3.46839	2.44715	3.01514	3.17178	3.02561	0.214504			-92.7	2.57141	2.92996	2.92872	3.12471	3.02928	2.91682	0.0936707
		-92.6	3.48533	2.50648	3.01259	3.18002	3.04611	0.20477			-92.6	2.45515	2.9351	2.99187	3.19944	3.11197	2.9387	0.129358
		-92.5	3.48142	2.51422	2.98203	3.15524	3.03323	0.201609			-92.5	2.52184	2.91072	2.97464	3.16209	3.08871	2.9316	0.111355
		-92.4	3.5375	2.43683	3.01004	3.16557	3.03749	0.228757			-92.4	2.61247	2.96505	2.91151	3.11791	3.1533	2.95205	0.0962136
		-92.3	3.52315	2.491	3.04062	3.12428	3.04476	0.212495			-92.3	2.48764	2.88057	2.96315	3.16208	3.0732	2.91333	0.116663
		-92.2	3.52838	2.54518	2.95909	3.17797	3.05265	0.205813			-92.2	2.47396	2.93693	2.97177	3.12471	3.11453	2.92438	0.118653
		-92.1	3.5362	2.44715	3.03297	3.14699	3.04083	0.225312			-92.1	2.45173	2.99175	2.94882	3.15187	3.04219	2.91727	0.121226
		-92	3.49968	2.53228	2.93871	3.16558	3.03406	0.203096			-92	2.53894	2.94217	3.03492	3.13489	3.14039	2.95826	0.11098
		-91.9	3.4397	2.48584	3.01259	3.18623	3.03109	0.201799			-91.9	2.50988	2.91949	2.93735	3.02618	3.08096	2.89477	0.100624
		-91.8	3.50882	2.51422	2.99476	3.10775	3.03139	0.20465			-91.8	2.52525	2.98333	2.96603	3.14508	3.11713	2.94736	0.111296
		-91.7	3.43316	2.49873	3.0177	3.26056	3.05254	0.20332			-91.7	2.46711	2.90154	3.01195	3.20964	3.0732	2.93269	0.126583
		-91.6	3.5362	2.5426	3.01006	3.09743	3.04657	0.203642			-91.6	2.52184	2.95848	2.97465	3.09074	3.07063	2.92326	0.103631
		-91.5	3.51142	2.48843	3.01004	3.11808	3.03199	0.210792			-91.5	2.45686	2.91607	2.95168	3.17566	3.12229	2.92451	0.126826
		-91.4	3.51664	2.53745	3.01259	3.10364	3.04258	0.200939			-91.4	2.54235	2.93685	2.98327	3.14509	3.06029	2.93357	0.104003
		-91.3	3.51664	2.5039	2.97947	3.18002	3.04501	0.211692			-91.3	2.48251	2.98816	2.9316	3.1349	3.1533	2.9381	0.12148
		-91.2	3.50229	2.44972	3.00494	3.1408	3.02444	0.218435			-91.2	2.52355	2.94586	2.9316	3.12472	3.04478	2.9141	0.103751
		-91.1	3.43969	2.52454	3.0024	3.11808	3.02118	0.189636			-91.1	2.47737	2.94073	2.91439	3.13489	3.13262	2.92	0.119951
		-91	3.49968	2.53486	3.04571	3.10569	3.04649	0.198043			-91	2.50815	2.92112	3.00621	3.20283	3.13521	2.95471	0.12193
		-90.9	3.48794	2.4678	2.9336	3.15525	3.01115	0.213958			-90.9	2.55774	2.92103	3.01195	3.11791	3.10679	2.94308	0.102733
		-90.8	3.53489	2.491	2.97183	3.15111	3.03721	0.216656			-90.8	2.51842	2.90163	2.989	3.17227	3.11712	2.93969	0.115525
		-90.7	3.54141	2.47036	2.98202	3.19861	3.0481	0.224382			-90.7	2.51329	2.93541	2.97752	3.18245	3.09904	2.94154	0.115666
		-90.6	3.5388	2.44716	2.94126	3.06646	2.99842	0.224312			-90.6	2.54749	2.93154	2.9804	3.18586	3.13265	2.95558	0.112275
		-90.5	3.46838	2.4781	2.94889	3.16351	3.01472	0.208214			-90.5	2.50644	2.95475	2.9316	3.09753	3.09387	2.91684	0.108183
		-90.4	3.55185	2.47553	2.99731	3.14493	3.0424	0.222379			-90.4	2.50987	2.90517	3.02343	3.19944	3.16623	2.96083	0.1244
		-90.3	3.48012	2.5168	2.9438	3.17797	3.02967	0.203163			-90.3	2.57826	2.91425	2.91151	3.13829	3.09645	2.92775	0.0988365
		-90.2	3.46447	2.49616	2.97183	3.18621	3.02967	0.204436			-90.2	2.48762	2.93002	2.97752	3.22661	3.11196	2.94675	0.126025
		-90.1	3.46447	2.51421	3.0024	3.17178	3.03822	0.199039			-90.1	2.48764	2.92303	2.94594	3.24361	3.09128	2.9383	0.126491
		-90	3.46055	2.51422	2.99477	3.16144	3.03274	0.197883			-90	2.52355	2.91606	2.95456	3.16887	3.16879	2.94637	0.118057
		-89.9	3.54403	2.53486	2.97948	3.16352	3.05547	0.209597			-89.9	2.53039	2.94425	3.00621	3.21642	3.10162	2.95978	0.116782
		-89.8	3.43056	2.50649	3.03553	3.16558	3.03454	0.19426			-89.8	2.54406	2.90503	3.02054	3.13151	3.09128	2.93848	0.105836
		-89.7	3.50099	2.48842	2.91832	3.15112	3.01472	0.212397			-89.7	2.52868	2.91236	2.923	3.08055	3.12228	2.91338	0.104802
		-89.6	3.48142	2.48325	3.01771	3.16971	3.03802	0.208593			-89.6	2.4637	2.93876	2.96316	3.18926	3.13004	2.93698	0.127593
		-89.5	3.52967	2.4291	2.99221	3.14079	3.02294	0.228083			-89.5	2.51842	2.98144	2.95743	3.06695	3.10937	2.92672	0.105753
		-89.4	3.48141	2.51423	2.92596	3.17178	3.02335	0.204235			-89.4	2.49277	2.87532	2.98325	3.17567	3.07062	2.91953	0.117596
		-89.3	3.50359	2.50648	2.97693	3.18004	3.04176	0.208793			-89.3	2.53722	2.92298	2.88569	3.14847	3.11194	2.92126	0.108798
		-89.2	3.52185	2.57613	3.00495	3.15526	3.06455	0.195673			-89.2	2.4141	2.93718	3.02344	3.1485	3.10421	2.92549	0.132838
		-89.1	3.50621	2.44457	3.01768	3.15939	3.03196	0.221054			-89.1	2.50988	2.91415	2.92585	3.11112	3.12747	2.91769	0.111313
		-89	3.54141	2.5168	2.97183	3.19037	3.0551	0.214379			-89	2.55262	2.89835	2.923	3.1213	3.15846	2.93074	0.107762
		-88.9	3.57273	2.45748	3.00495	3.14699	3.04554	0.23016			-88.9	2.46199	2.9298	3.00335	3.17567	3.13264	2.94069	0.127525
		-88.8	3.50881	2.55034	3.01515	3.14288	3.05429	0.197892			-88.8	2.48936	2.94059	3.00622	3.15529	3.0732	2.93293	0.11647
		-88.7	3.48403	2.50132	3.02278	3.14079	3.03723	0.203667			-88.7	2.47909	2.9638	2.91438	3.08732	3.05512	2.89994	0.109681
		-88.6	3.53229	2.45745	2.99731	3.15112	3.03454	0.222816			-88.6	2.56117	2.94785	2.98612	3.07375	3.14296	2.94237	0.101182
		-88.5	3.47099	2.53228	3.01259	3.0933	3.02729	0.192891			-88.5	2.49447	2.96539	3.01195	3.14508	3.10162	2.9437	0.116711
		-88.4	3.5036	2.42393	2.96928	3.13047	3.00682	0.224211			-88.4	2.4654	2.96041	3.01196	3.12808	3.09646	2.93246	0.120501
		-88.3	3.44621	2.53486	2.98456	3.14699	3.02816	0.190203			-88.3	2.50815	2.91426	2.98039	3.08054	3.09129	2.91492	0.106836
		-88.2	3.56229	2.45231	2.97438	3.12428	3.02831	0.228954			-88.2	2.55091	2.90529	3.02056	3.10094	3.0577	2.92708	0.0995008
		-88.1	3.48404	2.53486	3.02279	3.17177	3.05336	0.197755			-88.1	2.54065	2.92872	2.95456	3.07714	3.11196	2.92261	0.101658
		-88	3.48664	2.44457	3.01004	3.18417	3.03135	0.218976			-88	2.51158	2.91084	3.03203	3.10772	3.04736	2.92191	0.107445
		-87.9	3.53881	2.52712	2.96164	3.11395	3.03538	0.208842			-87.9	2.55432	2.93352	3.06648	3.1349	3.18432	2.97471	0.113235
		-87.8	3.47491	2.54002	2.96418	3.13873	3.02946	0.194545			-87.8	2.51671	2.91082	2.96316	3.15188	3.13005	2.93453	0.114328
		-87.7	3.52577	2.45487	2.94127	3.17384	3.02394	0.224531			-87.7	2.52012	2.93515	2.99186	3.10772	3.11196	2.93336	0.10874
		-87.6	3.51534	2.47811	2.98965	3.17384	3.03924	0.216432			-87.6	2.53893	2.92458	2.96029	3.1315	3.06287	2.92363	0.102941
		-87.5	3.52838	2.59936	2.94381	3.1697	3.06031	0.195171			-87.5	2.48934	2.9425	2.98039	3.13492	3.18172	2.94577	0.122675
		-87.4	3.53229	2.47553	2.99731	3.06233	3.01686	0.216249			-87.4	2.5492	2.90523	3.00048	3.22321	3.05512	2.94665	0.111989
		-87.3	3.53881	2.51937	2.954	3.15525	3.04186	0.212236			-87.3	2.5851	2.91754	2.97178	3.08734	3.03701	2.91975	0.0884698
		-87.2	3.49838	2.491	2.99221	3.20481	3.0466	0.212287			-87.2	2.57656	2.91604	3.01769	3.08733	3.09646	2.93882	0.0961457
		-87.1	3.49445	2.45489	2.96164	3.1408	3.01295	0.216459			-87.1	2.49106	2.90172	2.97464	3.18586	3.08871	2.9284	0.119604
		-87	3.55576	2.51164	3.02024	3.16145	3.06227	0.215702			-87	2.56116	2.95458	2.98038	3.06015	3.03702	2.91866	0.091361
		-86.9	3.46838	2.48326	2.96928	3.14286	3.01595	0.205494			-86.9	2.54919	2.87701	2.91438	3.12131	3.0887	2.91012	0.10195
		-86.8	3.59879	2.49358	2.97947	3.19861	3.06762	0.230325			-86.8	2.4979	2.91957	2.99473	3.12471	3.13006	2.93339	0.11595
		-86.7	3.51663	2.52196	2.96418	3.16352	3.04157	0.207473			-86.7	2.58682	2.92445	2.94595	3.14509	3.08354	2.93717	0.0968614
		-86.6	3.58054	2.51679	2.98712	3.25025	3.08368	0.224595			-86.6	2.56288	2.92314	2.98037	3.07375	3.13521	2.93507	0.100002
		-86.5	3.5049	2.5168	2.96418	3.18621	3.04302	0.207559			-86.5	2.57142	2.92654	2.99186	3.11452	3.09645	2.94016	0.0984002
		-86.4	3.52837	2.48842	2.9336	3.15938	3.02744	0.217502			-86.4	2.52868	2.92272	3.00047	3.14849	3.11196	2.94246	0.110937
		-86.3	3.52707	2.46004	3.0126	3.18623	3.04649	0.222777			-86.3	2.52355	2.89834	2.97178	3.12131	3.08095	2.91919	0.106478
		-86.2	3.50881	2.47552	2.93107	3.1346	3.0125	0.215294			-86.2	2.50645	2.94592	2.96029	3.18585	3.07838	2.93538	0.115736
		-86.1	3.49968	2.5426	3.04062	3.10982	3.04818	0.196495			-86.1	2.56971	2.92471	2.90577	3.18925	3.09386	2.93666	0.105892
		-86	3.51273	2.49102	3.02788	3.17384	3.05137	0.212602			-86	2.54065	2.9387	2.9402	3.12811	3.15072	2.93968	0.109378
		-85.9	3.51142	2.46004	2.92088	3.19035	3.02067	0.222465			-85.9	2.56288	2.94042	2.9976	3.12131	3.14556	2.95355	0.10482
		-85.8	3.48794	2.49616	3.03807	3.14286	3.04126	0.205546			-85.8	2.46369	2.93512	2.9689	3.15867	3.03186	2.91165	0.118315
		-85.7	3.53098	2.46778	2.95654	3.18417	3.03487	0.222887			-85.7	2.52014	2.91597	2.89142	3.09413	3.09646	2.90362	0.105082
		-85.6	3.48664	2.46263	3.0126	3.14079	3.02567	0.212708			-85.6	2.58339	2.91419	2.92874	3.11452	3.07837	2.92384	0.0938777
		-85.5	3.49185	2.49617	2.97947	3.18828	3.03894	0.209277			-85.5	2.49106	3.00436	2.9689	3.15188	3.04477	2.9322	0.114474
		-85.4	3.51403	2.42909	2.98967	3.12221	3.01375	0.224435			-85.4	2.52355	2.91925	3.03205	3.13149	3.10679	2.94263	0.111083
		-85.3	3.45926	2.46779	2.95145	3.20274	3.02031	0.211341			-85.3	2.50131	2.88428	2.90003	3.1315	3.08871	2.90117	0.111444
		-85.2	3.52968	2.48326	3.04318	3.12015	3.04407	0.215274			-85.2	2.50302	2.89281	2.93735	3.15187	3.10162	2.91734	0.114374
		-85.1	3.51404	2.49358	2.92851	3.16765	3.02595	0.214324			-85.1	2.53894	2.98626	2.95455	3.14169	3.10163	2.94461	0.107214
		-85	3.56228	2.50391	2.99476	3.12841	3.04734	0.217911			-85	2.50986	2.94064	2.96891	3.10434	3.08613	2.92198	0.107841
		-84.9	3.51534	2.48585	3.0126	3.18621	3.05	0.215012			-84.9	2.5851	2.95128	2.9603	3.07035	3.07062	2.92753	0.0893783
		-84.8	3.49708	2.48842	2.95401	3.15526	3.02369	0.210707			-84.8	2.52525	2.94426	2.92874	3.1383	3.15071	2.93745	0.113103
		-84.7	3.46186	2.5168	2.92342	3.19242	3.02363	0.201547			-84.7	2.48934	2.93327	2.90291	3.20963	3.13779	2.93459	0.125735
		-84.6	3.53359	2.49616	2.96927	3.17797	3.04425	0.216671			-84.6	2.55604	2.91766	3.03777	3.12472	3.03703	2.93464	0.100219
		-84.5	3.54402	2.48585	3.01006	3.15939	3.04983	0.219067			-84.5	2.49961	2.93837	2.95743	3.08732	3.12746	2.92204	0.111688
		-84.4	3.43969	2.46263	2.97183	3.1346	3.00219	0.204325			-84.4	2.51328	3.04494	2.91152	3.18247	3.05511	2.94146	0.115314
		-84.3	3.52316	2.50131	3.02024	3.15732	3.05051	0.211609			-84.3	2.52867	2.88391	3.00908	3.12811	3.1688	2.94371	0.11506
		-84.2	3.50881	2.47553	2.93107	3.16764	3.02076	0.217004			-84.2	2.4996	2.91415	2.95456	3.16209	3.08613	2.9233	0.114916
		-84.1	3.51533	2.46261	2.98457	3.16558	3.03202	0.219451			-84.1	2.50816	2.92661	2.98612	3.09414	3.13521	2.93005	0.11184
		-84	3.42274	2.52969	3.01514	3.16972	3.03432	0.18802			-84	2.52183	2.92988	2.88568	3.06016	3.11971	2.90345	0.104397
		-83.9	3.51273	2.47293	2.99477	3.17177	3.03805	0.216877			-83.9	2.55604	2.92829	2.96316	3.15529	3.11713	2.94398	0.106242
		-83.8	3.51011	2.56839	3.03552	3.1057	3.05493	0.192973			-83.8	2.45857	2.90156	2.9316	3.12132	3.10162	2.90293	0.119468
		-83.7	3.52576	2.5168	2.94636	3.15318	3.03553	0.210396			-83.7	2.59194	2.89105	3.01195	3.11791	3.13264	2.9491	0.0992633
		-83.6	3.54272	2.50647	3.02024	3.17177	3.0603	0.214764			-83.6	2.50815	2.9902	2.9689	3.18245	3.03961	2.93786	0.113695
		-83.5	3.44361	2.47553	2.99986	3.19862	3.0294	0.205719			-83.5	2.57143	2.84885	2.93447	3.12132	3.1068	2.91658	0.100533
		-83.4	3.53229	2.56582	3.00495	3.14906	3.06303	0.199624			-83.4	2.50815	2.93011	2.93446	3.11451	3.1223	2.92191	0.111506
		-83.3	3.43056	2.53744	3.0075	3.14906	3.03114	0.186579			-83.3	2.50302	2.91042	2.96605	3.10771	3.13778	2.925	0.113715
		-83.2	3.45403	2.46781	2.99986	3.15319	3.01872	0.206447			-83.2	2.43805	2.9477	2.89716	3.11451	3.11197	2.90188	0.123816
		-83.1	3.46447	2.53228	3.0075	3.14079	3.03626	0.193459			-83.1	2.56972	2.95357	2.92297	3.18586	3.10938	2.9483	0.10639
		-83	3.51012	2.52712	3.01006	3.19449	3.06045	0.205579			-83	2.52355	2.99344	3.02917	3.08053	3.11454	2.94824	0.108192
		-82.9	3.46968	2.5168	3.03807	3.19861	3.05579	0.200528			-82.9	2.54919	2.95107	2.90004	3.20963	3.1042	2.94283	0.11271
		-82.8	3.50881	2.53486	3.03553	3.11395	3.04829	0.200034			-82.8	2.46882	2.96723	2.9976	3.07034	3.11455	2.92371	0.116661
		-82.7	3.45533	2.50647	3.04827	3.16764	3.04443	0.198627			-82.7	2.49619	2.93015	2.91726	3.17226	3.0577	2.91471	0.114494
		-82.6	3.47491	2.47553	2.96928	3.15525	3.01874	0.209015			-82.6	2.49447	2.94918	3.03777	3.09074	3.12229	2.93889	0.11491
		-82.5	3.5049	2.5168	3.09667	3.10157	3.05498	0.203302			-82.5	2.55261	2.92132	2.91725	3.16886	3.08353	2.92871	0.105659
		-82.4	3.50229	2.45231	2.97183	3.12222	3.01216	0.217447			-82.4	2.44831	2.94217	2.99473	3.15526	3.11455	2.931	0.126721
		-82.3	3.55576	2.47552	2.99986	3.15524	3.04659	0.223488			-82.3	2.5663	2.94608	2.93447	3.12809	3.07578	2.93014	0.0982468
		-82.2	3.46707	2.48326	3.02279	3.1408	3.02848	0.204587			-82.2	2.53552	2.9936	2.98324	3.11791	3.06803	2.93966	0.104018
		-82.1	3.48794	2.49358	3.02788	3.14905	3.03962	0.20641			-82.1	2.54578	2.95168	2.98325	3.1315	3.11713	2.94587	0.106135
		-82	3.46446	2.48069	3.0712	3.13873	3.03877	0.20488			-82	2.63469	2.95081	2.94022	3.17906	3.09129	2.95921	0.0926068
		-81.9	3.55184	2.50132	3.01769	3.13048	3.05033	0.216104			-81.9	2.51842	2.94785	2.98612	3.18245	3.07321	2.94161	0.113232
		-81.8	3.54663	2.43682	2.94381	3.13461	3.01546	0.230272			-81.8	2.45856	2.96527	2.9603	3.16208	3.10421	2.93008	0.124223
		-81.7	3.51011	2.49358	2.96673	3.11189	3.02058	0.209881			-81.7	2.51328	2.89286	2.98325	3.1281	3.09387	2.92227	0.110378
		-81.6	3.44621	2.44199	2.93361	3.20481	3.00666	0.215378			-81.6	2.52697	2.92444	2.94594	3.20622	3.12488	2.94569	0.117424
		-81.5	3.52054	2.44715	3.04316	3.10568	3.02913	0.22103			-81.5	2.47567	3.00613	2.94021	3.14508	3.13003	2.93943	0.122095
		-81.4	3.52968	2.50131	2.99221	3.11602	3.03481	0.211724			-81.4	2.55261	2.93349	2.94595	3.15188	3.1378	2.94435	0.108183
		-81.3	3.46969	2.47295	2.99731	3.17178	3.02793	0.209122			-81.3	2.53551	2.88594	3.00621	3.16885	3.06285	2.93187	0.109099
		-81.2	3.46316	2.48843	3.01004	3.12841	3.02251	0.202235			-81.2	2.55774	3.0096	2.90864	3.1417	3.19464	2.96247	0.112905
		-81.1	3.52837	2.49874	2.93616	3.13667	3.02499	0.214221			-81.1	2.52356	2.88377	2.96315	3.19605	3.13265	2.93983	0.118278
		-81	3.43056	2.46777	2.97692	3.14905	3.00608	0.202331			-81	2.4962	2.92121	2.98612	3.15528	3.14556	2.94087	0.120008
		-80.9	3.57141	2.51164	2.99985	3.14493	3.05696	0.218524			-80.9	2.50644	2.92652	2.90864	3.18244	3.07321	2.91945	0.114793
		-80.8	3.49445	2.54776	2.94381	3.08917	3.0188	0.195513			-80.8	2.46198	2.91777	2.89429	3.16548	3.18173	2.92425	0.130215
		-80.7	3.52577	2.48586	3.02279	3.14493	3.04484	0.214915			-80.7	2.54406	2.95306	2.98613	3.09752	3.01118	2.91839	0.0965941
		-80.6	3.45925	2.49616	2.96163	3.1635	3.02014	0.202351			-80.6	2.47567	2.93006	2.91725	3.20624	3.1688	2.9396	0.130279
		-80.5	3.47099	2.491	2.94381	3.16764	3.01836	0.206322			-80.5	2.57997	2.92112	2.93159	3.09751	3.11453	2.92894	0.0961016
		-80.4	3.4449	2.50648	2.98203	3.13874	3.01804	0.19574			-80.4	2.52526	2.93725	2.92013	3.247	3.14296	2.95452	0.123855
		-80.3	3.54011	2.50648	3.0075	3.18003	3.05853	0.214873			-80.3	2.52184	2.89845	3.02343	3.10092	3.0577	2.92047	0.105211
		-80.2	3.48925	2.44714	2.97439	3.17177	3.02064	0.21861			-80.2	2.52697	2.93367	2.98326	3.11111	3.07321	2.92564	0.104523
		-80.1	3.52577	2.51423	2.9973	3.15526	3.04814	0.209612			-80.1	2.56629	2.8826	3.02917	3.11452	3.11196	2.94091	0.102696
		-80	3.49055	2.42393	2.99731	3.1346	3.0116	0.22175			-80	2.48251	2.95979	2.98325	3.23682	3.07578	2.94763	0.126058
		-79.9	3.54011	2.50906	2.97184	3.16144	3.04561	0.214335			-79.9	2.57997	2.97081	2.96315	3.07716	3.14297	2.94681	0.0976932
		-79.8	3.55185	2.51938	2.99477	3.14286	3.05221	0.213124			-79.8	2.57997	2.89661	3.0177	3.09414	3.07062	2.93181	0.0943459
		-79.7	3.50881	2.51163	2.97437	3.1057	3.02513	0.205486			-79.7	2.47738	2.97786	2.97751	3.09753	3.04219	2.9145	0.111548
		-79.6	3.56881	2.37491	2.97183	3.17177	3.02183	0.248775			-79.6	2.4654	2.93192	3.0263	3.10772	3.10163	2.92659	0.119606
		-79.5	3.52446	2.48069	2.95908	3.15525	3.02987	0.217363			-79.5	2.45685	2.93009	3.07795	3.10091	3.09645	2.93245	0.123014
		-79.4	3.52967	2.47035	2.94635	3.14081	3.02179	0.220206			-79.4	2.58168	2.87699	2.94309	3.07716	3.08354	2.91249	0.0916522
		-79.3	3.45012	2.47553	2.98201	3.10983	3.00437	0.202071			-79.3	2.46883	2.98347	2.95167	3.04998	3.10421	2.91163	0.113813
		-79.2	3.53359	2.47553	2.99987	3.1697	3.04467	0.219964			-79.2	2.53893	2.88932	2.94309	3.08734	3.10162	2.91206	0.101824
		-79.1	3.48664	2.49617	2.96673	3.12841	3.01949	0.205495			-79.1	2.568	2.9156	2.99186	3.09752	3.06545	2.92769	0.0952518
		-79	3.50358	2.50648	2.96928	3.20068	3.04501	0.210212			-79	2.52867	2.95857	2.96315	3.04997	3.06027	2.91213	0.0981696
		-78.9	3.51271	2.44198	3.01769	3.16764	3.03501	0.223191			-78.9	2.51671	2.94959	3.00907	3.08054	3.11454	2.93409	0.108185
		-78.8	3.46707	2.47553	2.98713	3.16764	3.02434	0.207992			-78.8	2.51842	2.90537	3.04926	3.17566	3.10162	2.95007	0.116623
		-78.7	3.4475	2.46263	2.94889	3.15731	3.00408	0.207429			-78.7	2.5167	2.93536	2.99761	3.07714	3.08353	2.92207	0.104957
		-78.6	3.58316	2.491	2.95145	3.10982	3.03386	0.225275			-78.6	2.53039	2.91059	3.00046	3.09414	3.07319	2.92175	0.10299
		-78.5	3.50621	2.61484	2.97692	3.22546	3.08086	0.189254			-78.5	2.47224	2.91605	2.98325	3.05677	3.06546	2.89875	0.110025
		-78.4	3.53229	2.51163	2.89539	3.18417	3.03087	0.21658			-78.4	2.48592	2.92307	2.95456	3.08393	3.0577	2.90104	0.108089
		-78.3	3.53359	2.49358	3.03043	3.16971	3.05683	0.215636			-78.3	2.63469	2.91045	2.99472	3.14169	3.13004	2.96232	0.0925695
		-78.2	3.52707	2.52454	2.98966	3.18417	3.05636	0.209201			-78.2	2.59878	2.92471	2.99186	3.09074	3.13004	2.94723	0.0943212
		-78.1	3.60271	2.50391	2.9336	3.18622	3.05661	0.230152			-78.1	2.55775	2.95842	2.97751	3.13489	3.04478	2.93467	0.0991676
		-78	3.54402	2.52196	3.0126	3.15731	3.05897	0.211242			-78	2.52868	2.94214	2.9689	3.14508	3.08096	2.93315	0.107638
		-77.9	3.60011	2.51423	2.95654	3.14287	3.05344	0.224904			-77.9	2.51499	2.95647	2.95455	3.09752	3.15072	2.93485	0.111847
		-77.8	3.53489	2.47036	2.93872	3.18416	3.03203	0.223641			-77.8	2.52526	2.90349	3.07507	3.11111	3.14297	2.95158	0.114322
		-77.7	3.58576	2.53228	3.04826	3.10776	3.06851	0.215453			-77.7	2.5013	2.90167	2.95742	3.02619	3.09645	2.89661	0.104096
		-77.6	3.54924	2.48842	2.97183	3.15939	3.04222	0.220311			-77.6	2.54919	2.91761	2.94021	3.23004	3.11194	2.9498	0.115421
		-77.5	3.55054	2.48584	3.0075	3.14287	3.04669	0.219698			-77.5	2.55262	2.90692	2.96603	3.06356	3.07321	2.91247	0.0951467
		-77.4	3.45924	2.55034	2.97438	3.20068	3.04616	0.19268			-77.4	2.52355	2.9459	2.9689	3.18247	3.07838	2.93984	0.112302
		-77.3	3.54924	2.48584	2.97693	3.12014	3.03304	0.219209			-77.3	2.4808	2.94915	2.98325	3.02278	3.1197	2.91114	0.11131
		-77.2	3.57403	2.491	2.9693	3.23373	3.06701	0.228436			-77.2	2.50474	2.88612	3.01194	3.19604	3.11712	2.94319	0.121327
		-77.1	3.49186	2.43683	3.0075	3.17796	3.02854	0.221275			-77.1	2.48765	2.92811	3.01482	3.10772	3.09904	2.92747	0.114674
		-77	3.56358	2.43425	2.98456	3.19242	3.0437	0.235819			-77	2.50815	2.91411	2.96604	3.20283	3.1688	2.95199	0.124208
		-76.9	3.54012	2.49616	2.98967	3.16145	3.04685	0.216598			-76.9	2.52184	2.97027	2.97178	3.12472	3.01119	2.91996	0.103432
		-76.8	3.46186	2.48585	2.954	3.17797	3.01992	0.20613			-76.8	2.48422	2.95142	3.0636	3.1417	3.14555	2.9573	0.123407
		-76.7	3.56228	2.42652	2.97948	3.12428	3.02314	0.2343			-76.7	2.53038	2.88019	2.9402	3.15189	3.11195	2.92292	0.110538
		-76.6	3.56097	2.49874	2.96673	3.17383	3.05007	0.221217			-76.6	2.55946	2.92625	2.96316	3.10432	3.0603	2.9227	0.0963106
		-76.5	3.54924	2.51164	2.97948	3.19861	3.05974	0.217132			-76.5	2.45857	2.97269	3.03777	3.21983	3.11454	2.96068	0.132105
		-76.4	3.51925	2.4394	2.94126	3.1759	3.01895	0.226724			-76.4	2.52355	2.91065	2.91726	3.08395	3.06287	2.89966	0.10062
		-76.3	3.51141	2.49874	3.01004	3.14699	3.0418	0.209665			-76.3	2.50473	2.89979	2.92299	3.07374	3.0732	2.89489	0.104119
		-76.2	3.50881	2.46262	2.97691	3.14492	3.02332	0.217376			-76.2	2.48423	2.9195	2.92298	3.18586	3.05253	2.91302	0.117879
		-76.1	3.5023	2.46004	2.97948	3.18003	3.03046	0.218515			-76.1	2.52183	2.93502	2.95743	3.12471	3.07837	2.92347	0.106558
		-76	3.52055	2.55292	3.02534	3.16763	3.06661	0.200384			-76	2.52183	2.94411	2.9603	3.10432	3.07578	2.92127	0.104637
		-75.9	3.53881	2.5039	2.954	3.13048	3.0318	0.214385			-75.9	2.48423	2.95304	2.9402	3.19265	3.14297	2.94262	0.125079
		-75.8	3.52185	2.48327	2.93106	3.1821	3.02957	0.218662			-75.8	2.515	2.90554	2.87707	3.13829	3.11454	2.91009	0.112046
		-75.7	3.51925	2.45747	2.98456	3.11395	3.01881	0.219045			-75.7	2.50473	2.93168	2.95456	3.12471	3.05254	2.91364	0.107947
		-75.6	3.43839	2.62256	3.00494	3.13459	3.05012	0.169001			-75.6	2.59538	2.94207	3.00621	3.17567	3.14814	2.97349	0.104021
		-75.5	3.48273	2.47037	2.9591	3.20069	3.02822	0.214533			-75.5	2.48592	2.93531	2.90003	3.19945	3.09129	2.9224	0.121749
		-75.4	3.55707	2.50391	3.01005	3.08091	3.03798	0.215505			-75.4	2.59535	2.95297	2.9316	3.10092	3.09904	2.93598	0.0922302
		-75.3	3.48664	2.51938	2.96419	3.21718	3.04685	0.205646			-75.3	2.54235	2.92141	2.9804	3.16208	3.13004	2.94725	0.110741
		-75.2	3.48534	2.50648	2.99476	3.22959	3.05404	0.208201			-75.2	2.52355	2.93182	2.92585	3.13829	3.1533	2.93456	0.11366
		-75.1	3.53228	2.48584	2.99476	3.17383	3.04668	0.217795			-75.1	2.55774	2.89439	2.92012	3.15527	3.10421	2.92635	0.105112
		-75	3.53359	2.46779	3.0279	3.13048	3.03994	0.219733			-75	2.49106	2.88409	2.95742	3.11452	3.15847	2.92111	0.118612
		-74.9	3.45925	2.49616	2.99222	3.19449	3.03553	0.203634			-74.9	2.53894	3.0011	2.97465	3.04656	3.06027	2.9243	0.0975626
		-74.8	3.55054	2.47553	3.03808	3.07886	3.03575	0.219986			-74.8	2.55262	2.91582	2.94594	3.15528	3.10162	2.93426	0.105591
		-74.7	3.42664	2.58387	2.95654	3.19036	3.03935	0.179609			-74.7	2.57826	2.94958	2.9316	3.10432	3.09646	2.93204	0.0954426
		-74.6	3.46186	2.46263	3.04318	3.18416	3.03795	0.210574			-74.6	2.49789	2.96029	2.98326	3.15867	3.06028	2.93208	0.113955
		-74.5	3.52577	2.58128	2.93107	3.19243	3.05764	0.200051			-74.5	2.47909	2.89634	2.99759	3.10092	3.11712	2.91821	0.116739
		-74.4	3.51011	2.51422	2.98201	3.12841	3.03369	0.205845			-74.4	2.55945	3.00085	2.9316	3.14847	3.16622	2.96132	0.109763
		-74.3	3.51403	2.54776	2.97947	3.13461	3.04397	0.199907			-74.3	2.54749	2.88232	3.01483	3.1145	3.0396	2.91975	0.100327
		-74.2	3.46708	2.48584	3.03553	3.14286	3.03283	0.204101			-74.2	2.54237	2.95671	2.9316	3.10771	3.13781	2.93524	0.106208
		-74.1	3.47882	2.45489	2.95909	3.16145	3.01356	0.214751			-74.1	2.48592	2.95819	2.98898	3.18924	3.14038	2.95254	0.12458
		-74	3.51272	2.51163	2.99477	3.16764	3.04669	0.208325			-74	2.5355	2.95126	2.89143	3.18586	3.09645	2.9321	0.111963
		-73.9	3.50751	2.55292	3.01005	3.11602	3.04662	0.19628			-73.9	2.49448	2.97234	3.0177	3.15529	3.07836	2.94363	0.116405
		-73.8	3.5036	2.4678	2.96674	3.14906	3.0218	0.215692			-73.8	2.54236	2.98644	2.96031	3.17227	3.15588	2.96345	0.113687
		-73.7	3.54924	2.49874	3.02788	3.13667	3.05313	0.216236			-73.7	2.55261	2.91049	2.92874	3.12811	3.06028	2.91604	0.0995122
		-73.6	3.47881	2.43166	2.94125	3.10569	2.98936	0.217263			-73.6	2.51329	2.9974	2.9689	3.12812	3.07579	2.9367	0.10954
		-73.5	3.53097	2.48325	3.01515	3.11602	3.03635	0.215516			-73.5	2.56972	2.98997	2.94882	3.10434	3.08871	2.94031	0.0971609
		-73.4	3.48142	2.48326	3.02532	3.10156	3.02289	0.205678			-73.4	2.54577	2.94414	2.94022	3.16548	3.09387	2.9379	0.107221
		-73.3	3.46186	2.45231	2.99731	3.13667	3.01204	0.210434			-73.3	2.50132	2.92123	2.95168	3.1315	3.1533	2.93181	0.117209
		-73.2	3.5075	2.44199	3.01005	3.17383	3.03335	0.222636			-73.2	2.42779	2.96545	3.05211	3.15189	3.1223	2.94391	0.132972
		-73.1	3.51794	2.49358	2.98713	3.1284	3.03176	0.211607			-73.1	2.56286	2.88754	3.00333	3.22324	3.10936	2.95727	0.113228
		-73	3.47361	2.43682	2.95145	3.11188	2.99344	0.215286			-73	2.53209	2.94574	3.01195	3.12131	3.09645	2.94151	0.10699
		-72.9	3.5049	2.47811	2.97948	3.12015	3.02066	0.212219			-72.9	2.60392	2.94374	3.01483	3.13829	3.16879	2.97391	0.101113
		-72.8	3.51794	2.4291	3.04061	3.12841	3.02902	0.225272			-72.8	2.45173	2.90673	2.97177	3.16887	3.08354	2.91653	0.124651
		-72.7	3.5375	2.48068	2.93105	3.10982	3.01476	0.218811			-72.7	2.49448	2.94426	3.03779	3.16886	3.08871	2.94682	0.118813
		-72.6	3.43708	2.47553	3.01515	3.13666	3.0161	0.200828			-72.6	2.57655	2.94031	2.92587	3.10433	3.11972	2.93336	0.0978201
		-72.5	3.51664	2.48843	2.97439	3.15732	3.0342	0.21396			-72.5	2.50302	2.91741	3.06074	3.18925	3.16363	2.96681	0.125416
		-72.4	3.49446	2.48585	2.94889	3.13666	3.01647	0.20997			-72.4	2.48251	2.92456	2.95743	3.14169	3.10678	2.9226	0.117648
		-72.3	3.50229	2.5529	2.9973	3.16558	3.05452	0.197427			-72.3	2.57313	2.94063	2.93735	3.16548	3.10162	2.94364	0.102834
		-72.2	3.58576	2.48068	2.97438	3.14492	3.04643	0.228371			-72.2	2.55604	2.92811	2.94021	3.07374	3.11195	2.92201	0.098337
		-72.1	3.47228	2.46004	2.95145	3.22132	3.02627	0.216638			-72.1	2.52525	2.95478	2.97178	3.22322	3.13781	2.96257	0.120424
		-72	3.51794	2.49874	2.96928	3.10362	3.02239	0.209998			-72	2.5321	2.89439	2.96317	3.17227	3.15072	2.94253	0.115611
		-71.9	3.46187	2.50132	2.99986	3.14698	3.02751	0.200121			-71.9	2.50302	2.96192	2.96029	3.09413	3.09645	2.92316	0.109237
		-71.8	3.55185	2.51422	2.98202	3.11808	3.04154	0.213676			-71.8	2.515	2.90866	2.94595	3.16208	3.15588	2.93751	0.1178
		-71.7	3.51142	2.47295	3.00241	3.18622	3.04325	0.217281			-71.7	2.4979	2.93371	2.94594	3.1383	3.11971	2.92711	0.115393
		-71.6	3.49968	2.48326	3.03043	3.16144	3.0437	0.211354			-71.6	2.51157	2.90863	2.9603	3.21303	3.13262	2.94523	0.12175
		-71.5	3.46186	2.44971	2.90813	3.1408	2.99013	0.212917			-71.5	2.55433	2.9477	3.00046	3.18925	3.08355	2.95506	0.10818
		-71.4	3.46185	2.51163	2.99476	3.12428	3.02313	0.19688			-71.4	2.50815	2.8943	2.99474	3.18925	3.14814	2.94692	0.121817
		-71.3	3.49447	2.43682	3.04573	3.17383	3.03771	0.221414			-71.3	2.53211	2.96737	3.0177	3.1349	3.08611	2.94764	0.107752
		-71.2	3.50229	2.47036	2.98966	3.10982	3.01803	0.212852			-71.2	2.49276	2.97614	2.96316	3.15528	3.13005	2.94348	0.11922
		-71.1	3.5075	2.52455	3.03808	3.18003	3.06254	0.204497			-71.1	2.53381	2.88215	2.98898	3.19264	3.09904	2.93932	0.113987
		-71	3.55184	2.46005	2.9591	3.12635	3.02434	0.225711			-71	2.5338	2.95613	3.01195	3.1315	3.17138	2.96095	0.113677
		-70.9	3.46055	2.50131	2.93107	3.20276	3.02392	0.205013			-70.9	2.50304	2.97269	2.86561	3.17566	3.08612	2.92062	0.116736
		-70.8	3.55315	2.45747	2.99985	3.147	3.03937	0.226519			-70.8	2.56288	2.95678	3.04352	3.11791	3.1223	2.96068	0.103915
		-70.7	3.47751	2.5168	2.97946	3.12841	3.02554	0.199121			-70.7	2.43463	2.94586	2.96605	3.11452	3.08096	2.9084	0.122769
		-70.6	3.46316	2.44457	3.0177	3.15319	3.01965	0.213162			-70.6	2.59536	2.90186	3.01195	3.04997	3.11454	2.93474	0.091604
		-70.5	3.50229	2.47553	3.03809	3.16558	3.04537	0.213697			-70.5	2.44487	2.95663	2.95169	3.1315	3.13264	2.92347	0.126091
		-70.4	3.4749	2.47036	2.9387	3.15112	3.00877	0.210622			-70.4	2.5338	2.86635	3.00907	3.06016	3.07838	2.90955	0.10103
		-70.3	3.46707	2.48585	2.93361	3.12841	3.00374	0.204807			-70.3	2.55603	2.90001	2.96604	3.07035	3.09646	2.91778	0.0971363
		-70.2	3.49316	2.40328	2.92597	3.19242	3.00371	0.231253			-70.2	2.53893	2.97775	3.00334	3.14509	3.0577	2.94456	0.105382
		-70.1	3.501	2.5168	2.97692	3.14493	3.03491	0.204358			-70.1	2.58339	2.88957	3.02056	3.12469	3.06803	2.93725	0.0966101
		-70	3.6301	2.46779	2.954	3.14494	3.04921	0.240436			-70	2.57485	2.90375	3.05786	3.13489	3.01119	2.93651	0.0978605
		-69.9	3.51142	2.52455	2.98711	3.18417	3.05181	0.206347			-69.9	2.5509	3.00927	3.00622	3.11791	3.16363	2.96959	0.109057
		-69.8	3.54142	2.51422	3.0024	3.15937	3.05435	0.212663			-69.8	2.46883	2.9245	2.95455	3.07375	3.05252	2.89483	0.110182
		-69.7	3.48663	2.49616	2.99221	3.15319	3.03205	0.206173			-69.7	2.57997	2.8947	3.00335	3.10433	3.17138	2.95075	0.103838
		-69.6	3.5675	2.48069	2.94126	3.12841	3.02947	0.225132			-69.6	2.44147	2.91754	2.98325	3.08394	3.05512	2.89626	0.117328
		-69.5	3.54663	2.48842	2.95908	3.14079	3.03373	0.219367			-69.5	2.47567	2.8717	2.96031	3.12131	3.0577	2.89734	0.113646
		-69.4	3.58314	2.49616	2.99476	3.22546	3.07488	0.227732			-69.4	2.49619	2.89982	2.98038	3.18245	3.15072	2.94191	0.123163
		-69.3	3.51142	2.53485	2.98457	3.1759	3.05169	0.203798			-69.3	2.57656	2.94094	3.02917	3.10772	3.04477	2.93983	0.0946438
		-69.2	3.55837	2.50648	3.05081	3.17383	3.07237	0.217406			-69.2	2.57827	2.88188	2.98326	3.15529	3.12228	2.9442	0.103823
		-69.1	3.52577	2.48585	2.94125	3.1883	3.03529	0.218843			-69.1	2.53894	2.9532	2.96891	3.16548	3.13523	2.95235	0.111816
		-69	3.47621	2.49874	2.96674	3.19449	3.03404	0.206625			-69	2.568	2.90893	2.93734	3.09413	3.15072	2.93182	0.101779
		-68.9	3.5075	2.57099	2.97691	3.13461	3.0475	0.193915			-68.9	2.56971	2.92291	2.98038	3.10092	3.08612	2.93201	0.096427
		-68.8	3.53751	2.56067	2.96418	3.21101	3.06834	0.205963			-68.8	2.52184	2.86416	2.99187	3.14169	3.09904	2.92372	0.111343
		-68.7	3.52708	2.49874	2.90304	3.13873	3.0169	0.215363			-68.7	2.55261	2.95656	2.99187	3.13829	3.07061	2.94199	0.10232
		-68.6	3.52316	2.45231	3.0024	3.1821	3.03999	0.223688			-68.6	2.53552	2.88406	3.02344	3.08733	3.07321	2.92071	0.102784
		-68.5	3.58315	2.42908	3.01004	3.1821	3.05109	0.239589			-68.5	2.53552	2.89617	2.94882	3.19604	3.07061	2.92943	0.111278
		-68.4	3.54011	2.51164	2.99986	3.19242	3.06101	0.214544			-68.4	2.47908	2.93186	2.96029	3.09752	3.07579	2.90891	0.112103
		-68.3	3.49968	2.43425	2.94127	3.18417	3.01484	0.224767			-68.3	2.50132	2.86432	2.9689	3.11111	3.01118	2.89137	0.105244
		-68.2	3.53229	2.44715	2.99474	3.15731	3.03287	0.225355			-68.2	2.50473	2.88402	2.96605	3.13488	3.13005	2.92395	0.115343
		-68.1	3.51664	2.44456	2.9489	3.15939	3.01737	0.224023			-68.1	2.48079	2.9404	2.98327	3.17566	3.04479	2.92498	0.117926
		-68	3.53098	2.53227	2.9336	3.1346	3.03286	0.20795			-68	2.54749	2.92087	2.92872	3.04318	3.12488	2.91303	0.0989305
		-67.9	3.59489	2.39556	3.01769	3.21101	3.05479	0.250344			-67.9	2.60733	2.96722	2.98898	3.14509	3.03702	2.94913	0.0907938
		-67.8	3.50489	2.48069	2.92342	3.15939	3.01709	0.214999			-67.8	2.52355	2.87694	2.99186	3.08732	3.13006	2.92195	0.108695
		-67.7	3.54533	2.47295	2.97184	3.14905	3.03479	0.222361			-67.7	2.52013	2.85901	2.99761	3.09414	3.10163	2.9145	0.107889
		-67.6	3.51273	2.55807	2.94635	3.20481	3.05549	0.202216			-67.6	2.54577	2.91427	2.94594	3.1451	3.15847	2.94191	0.110881
		-67.5	3.56098	2.49874	3.02025	3.13461	3.05364	0.218515			-67.5	2.49105	2.9422	2.98326	3.14169	3.04477	2.9206	0.112518
		-67.4	3.54533	2.38008	2.98457	3.15937	3.01734	0.242577			-67.4	2.54577	2.86443	2.94596	3.09753	3.10162	2.91106	0.101959
		-67.3	3.49969	2.49101	2.94889	3.16145	3.02526	0.211125			-67.3	2.50987	2.98819	2.94022	3.12809	3.01895	2.91706	0.106376
		-67.2	3.49839	2.52712	2.95145	3.12841	3.02634	0.201676			-67.2	2.51841	2.92966	2.90864	3.1281	3.11195	2.91935	0.109919
		-67.1	3.45925	2.38007	2.98712	3.19656	3.00575	0.229835			-67.1	2.52012	2.93716	2.9689	3.16886	3.09387	2.93779	0.11251
		-67	3.58837	2.54259	2.89538	3.17177	3.04953	0.22099			-67	2.54406	2.88956	2.94594	3.10091	3.07837	2.91177	0.100101
		-66.9	3.48141	2.50133	3.01005	3.20894	3.05043	0.206964			-66.9	2.50473	2.93335	2.89143	3.17566	3.1042	2.92187	0.116773
		-66.8	3.51273	2.48844	3.0279	3.15938	3.04711	0.212503			-66.8	2.48251	2.91964	2.98611	3.16548	3.10162	2.93107	0.120084
		-66.7	3.51533	2.51421	2.99475	3.16351	3.04695	0.208068			-66.7	2.55261	3.00616	2.92299	3.18585	3.10421	2.95436	0.109797
		-66.6	3.49185	2.4652	3.00494	3.19861	3.04015	0.21621			-66.6	2.54236	2.88554	2.96317	3.09413	3.03961	2.90496	0.0972525
		-66.5	3.52837	2.55034	2.96927	3.16351	3.05288	0.203688			-66.5	2.53552	2.94414	2.98614	3.06016	3.0887	2.92293	0.10021
		-66.4	3.54924	2.45488	2.95908	3.16972	3.03323	0.228196			-66.4	2.47395	2.97421	2.98039	3.20624	3.09129	2.94521	0.125227
		-66.3	3.4123	2.49615	3.03297	3.15732	3.02469	0.193057			-66.3	2.57142	2.93183	2.92585	3.10092	3.06028	2.91806	0.0932943
		-66.2	3.57011	2.49874	2.98966	3.20481	3.06583	0.223793			-66.2	2.47909	2.92803	2.93448	3.12469	3.13522	2.9203	0.118932
		-66.1	3.49707	2.50132	3.02532	3.16557	3.04732	0.207135			-66.1	2.53552	2.90359	2.93735	3.20624	3.09387	2.93531	0.113884
		-66	3.5336	2.54775	3.03043	3.16144	3.0683	0.20363			-66	2.50302	2.95302	2.93159	3.06016	3.05511	2.90058	0.10274
		-65.9	3.48795	2.49099	2.97438	3.15114	3.02611	0.207756			-65.9	2.51158	3.02392	3.02344	3.23003	3.1223	2.98225	0.123688
		-65.8	3.44751	2.56323	3.02278	3.22545	3.06475	0.188329			-65.8	2.50303	2.90707	2.87995	3.16887	3.11197	2.91418	0.117101
		-65.7	3.49707	2.5168	3.01003	3.20894	3.05821	0.206309			-65.7	2.50473	2.91773	2.96315	3.11452	3.06803	2.91363	0.108134
		-65.6	3.42534	2.50648	3.00241	3.15526	3.02237	0.192913			-65.6	2.51842	2.98151	2.96316	3.20625	3.11196	2.95626	0.118137
		-65.5	3.52577	2.51164	3.00241	3.13873	3.04464	0.209406			-65.5	2.5338	2.83407	2.97177	3.04657	3.12487	2.90222	0.103833
		-65.4	3.45926	2.56067	3.03298	3.10363	3.03913	0.18476			-65.4	2.59023	2.98139	2.94883	3.16547	3.13522	2.96423	0.102504
		-65.3	3.42535	2.5684	2.97183	3.13666	3.02556	0.178898			-65.3	2.50986	3.00083	2.97751	3.11452	3.04478	2.9295	0.107474
		-65.2	3.45794	2.49101	3.04318	3.15938	3.03788	0.202137			-65.2	2.52183	2.88757	2.95744	3.10091	3.05511	2.90457	0.102662
		-65.1	3.49707	2.49358	3.00241	3.09744	3.02263	0.206355			-65.1	2.48592	2.91582	2.95741	3.11111	3.09904	2.91386	0.113629
		-65	3.50229	2.44972	3.03808	3.13873	3.03221	0.21826			-65	2.46027	2.98129	2.94308	3.19264	3.13262	2.94198	0.12899
		-64.9	3.53229	2.4781	2.99477	3.15112	3.03907	0.218416			-64.9	2.49448	2.96352	2.9316	3.09753	3.06288	2.91	0.108289
		-64.8	3.5075	2.47553	2.97947	3.16352	3.0315	0.215215			-64.8	2.50474	2.91216	3.0349	3.16207	3.12746	2.94826	0.119026
		-64.7	3.51402	2.57357	3.00496	3.16765	3.06505	0.195206			-64.7	2.48251	2.96366	2.89717	3.14508	3.06544	2.91077	0.115156
		-64.6	3.48141	2.48842	2.98967	3.09743	3.01423	0.204585			-64.6	2.47566	3.03791	3.02344	3.10433	3.14037	2.95634	0.122061
		-64.5	3.44751	2.51937	3.01005	3.1759	3.03821	0.195037			-64.5	2.49789	2.91593	2.9775	3.12809	3.09387	2.92266	0.112914
		-64.4	3.50881	2.5426	2.97183	3.16351	3.04669	0.201435			-64.4	2.56458	2.94069	2.93735	3.14169	3.09903	2.93667	0.1017
		-64.3	3.49968	2.42134	3.00494	3.10156	3.00688	0.222613			-64.3	2.43804	2.92307	3.02057	3.14168	3.11454	2.92758	0.128279
		-64.2	3.51794	2.52712	2.95909	3.15319	3.03933	0.206324			-64.2	2.51842	2.90508	2.95742	3.16887	3.11195	2.93235	0.114217
		-64.1	3.45925	2.5168	2.99987	3.14493	3.03021	0.196162			-64.1	2.48593	2.95121	2.91438	3.16547	3.10162	2.92372	0.118869
		-64	3.49446	2.46005	2.91833	3.08503	2.98947	0.213989			-64	2.54578	2.94939	3.03205	3.14508	3.11454	2.95737	0.108395
		-63.9	3.53229	2.46005	2.97183	3.15525	3.02985	0.222899			-63.9	2.51671	2.95291	3.0636	3.09074	3.12229	2.94925	0.111834
		-63.8	3.5362	2.43942	2.96927	3.10569	3.01265	0.22606			-63.8	2.53893	2.97602	3.02629	3.11111	3.13781	2.95803	0.108716
		-63.7	3.43969	2.49358	2.954	3.15938	3.01166	0.199325			-63.7	2.52697	2.93887	2.93161	3.17227	3.08612	2.93117	0.11081
		-63.6	3.54532	2.47295	3.01005	3.08711	3.02886	0.219757			-63.6	2.52525	2.94777	2.99185	3.20964	3.08354	2.95161	0.11563
		-63.5	3.51272	2.46263	3.05591	3.16558	3.04921	0.218424			-63.5	2.4979	2.92101	2.96604	3.10092	3.10937	2.91905	0.111553
		-63.4	3.53751	2.51165	2.96419	3.10362	3.02924	0.211345			-63.4	2.58169	2.94786	2.94308	3.17567	3.15588	2.96083	0.106872
		-63.3	3.52968	2.52196	2.98711	3.17383	3.05314	0.209794			-63.3	2.44319	2.8983	2.94308	3.20964	3.08096	2.91503	0.130005
		-63.2	3.4723	2.51163	2.97947	3.21928	3.04567	0.204477			-63.2	2.55946	2.9602	2.99187	3.11452	3.11454	2.94812	0.102103
		-63.1	3.46577	2.49358	2.92343	3.09331	2.99402	0.201625			-63.1	2.60733	2.93892	2.9689	3.17227	3.18172	2.97383	0.104442
		-63	3.51794	2.5297	2.97691	3.14699	3.04288	0.204984			-63	2.47567	2.97269	2.9689	3.19944	3.09129	2.9416	0.124034
		-62.9	3.53881	2.50648	2.98967	3.12634	3.04033	0.212807			-62.9	2.55946	2.9775	2.94883	3.12811	3.15331	2.95344	0.106367
		-62.8	3.54403	2.44972	2.954	3.1759	3.03091	0.228766			-62.8	2.58852	2.96358	2.97465	3.16547	3.09387	2.95722	0.0995806
		-62.7	3.49968	2.491	2.95654	3.19036	3.03439	0.212556			-62.7	2.53893	2.95664	3.02055	3.20622	3.03444	2.95136	0.111079
		-62.6	3.47099	2.51939	2.97948	3.10568	3.01889	0.196422			-62.6	2.52183	2.98145	2.90863	3.14509	3.22306	2.95601	0.122163
		-62.5	3.48534	2.43684	2.96674	3.1697	3.01465	0.220179			-62.5	2.47395	2.93888	2.9976	3.19943	3.09387	2.94074	0.124799
		-62.4	3.55576	2.56582	2.98967	3.1346	3.06146	0.204226			-62.4	2.6039	2.94423	2.99473	3.1213	3.14038	2.96091	0.0966465
		-62.3	3.48795	2.47809	2.99986	3.12839	3.02357	0.209114			-62.3	2.48421	2.88595	2.97752	3.07714	3.19724	2.92441	0.121623
		-62.2	3.50881	2.44973	3.02279	3.15734	3.03467	0.220257			-62.2	2.5663	2.91976	2.98899	3.17226	3.11712	2.95289	0.106523
		-62.1	3.5349	2.49615	2.98711	3.12633	3.03612	0.214259			-62.1	2.49789	2.94257	2.98038	3.18245	3.07319	2.9353	0.116942
		-62	3.45273	2.45746	2.97183	3.13459	3.00415	0.207797			-62	2.53209	2.97417	2.97465	3.13489	3.11194	2.94555	0.108663
		-61.9	3.53228	2.51163	2.95909	3.13873	3.03543	0.211684			-61.9	2.53038	2.85543	2.94882	3.04316	3.12746	2.90105	0.103251
		-61.8	3.54665	2.51164	2.98456	3.10982	3.03817	0.212875			-61.8	2.50987	2.9532	3.02343	3.05335	3.1042	2.92881	0.107548
		-61.7	3.51795	2.37234	2.9973	3.18417	3.01794	0.240635			-61.7	2.47567	2.9195	2.98037	3.17566	3.07319	2.92488	0.120371
		-61.6	3.52316	2.54776	2.99732	3.12015	3.0471	0.200787			-61.6	2.59365	2.92834	2.9029	3.12471	3.11196	2.93231	0.0961408
		-61.5	3.5036	2.48069	3.00241	3.11395	3.02516	0.210902			-61.5	2.57143	2.94937	3.01482	3.07714	3.09645	2.94184	0.0961241
		-61.4	3.50229	2.48584	2.98203	3.147	3.02929	0.211179			-61.4	2.55604	2.89303	2.97178	3.01599	3.03703	2.89478	0.0882058
		-61.3	3.54793	2.42135	2.95145	3.20067	3.03035	0.236995			-61.3	2.46712	2.94066	3.01195	3.16208	3.12489	2.94134	0.124958
		-61.2	3.52446	2.49874	2.99476	3.15112	3.04227	0.212532			-61.2	2.48592	2.89128	2.99474	3.1213	3.1042	2.91949	0.116037
		-61.1	3.5662	2.44198	2.92596	3.14906	3.0208	0.234153			-61.1	2.6689	2.88573	2.97177	3.08394	3.07061	2.93619	0.0758804
		-61	3.49707	2.5297	2.92343	3.15319	3.02585	0.203084			-61	2.4996	2.92282	2.99473	3.10772	3.15847	2.93667	0.116843
		-60.9	3.52186	2.50132	3.04826	3.15319	3.05616	0.210989			-60.9	2.58169	2.90185	2.98613	3.10092	3.01637	2.91739	0.0897609
		-60.8	3.55186	2.48583	2.94381	3.1697	3.0378	0.222703			-60.8	2.50132	2.92085	3.05786	3.07713	3.14297	2.94003	0.115477
		-60.7	3.51404	2.44715	2.98713	3.19241	3.03518	0.224001			-60.7	2.57483	2.95287	3.00334	3.21983	3.11454	2.97308	0.109731
		-60.6	3.46446	2.55292	3.01259	3.06232	3.02307	0.186529			-60.6	2.49446	2.84684	2.99187	3.05336	3.12746	2.9028	0.112015
		-60.5	3.50752	2.53228	2.96419	3.21308	3.05427	0.206406			-60.5	2.60562	2.91606	2.9689	3.12469	3.07062	2.93718	0.0906516
		-60.4	3.54141	2.48584	2.93106	3.19241	3.03768	0.222408			-60.4	2.52012	2.92489	3.00333	3.09073	3.09904	2.92762	0.10672
		-60.3	3.52316	2.51939	3.02024	3.18623	3.06226	0.20902			-60.3	2.5338	2.91058	2.97751	3.16547	3.11454	2.94038	0.111483
		-60.2	3.49315	2.50907	3.01259	3.14286	3.03942	0.203831			-60.2	2.53893	2.87892	2.98325	3.1485	3.06287	2.92249	0.105711
		-60.1	3.52186	2.53227	2.97182	3.14286	3.0422	0.205182			-60.1	2.49447	2.89983	2.90863	3.1077	3.04736	2.8916	0.107012
		-60	3.58706	2.48326	2.9591	3.17589	3.05133	0.229807			-60	2.55945	2.97609	2.96317	3.04997	3.16105	2.94195	0.101882
		-59.9	3.55576	2.51163	2.96419	3.13873	3.04258	0.216149			-59.9	2.48935	2.88909	2.98038	3.14509	3.09387	2.91956	0.116396
		-59.8	3.53489	2.50133	2.92596	3.12634	3.02213	0.214916			-59.8	2.50644	2.88584	2.95169	3.08393	3.11454	2.90849	0.108917
		-59.7	3.5362	2.51164	2.97948	3.16351	3.04771	0.212927			-59.7	2.50303	2.89791	3.03491	3.09753	3.09905	2.92649	0.11201
		-59.6	3.48925	2.43425	2.93106	3.12014	2.99367	0.219558			-59.6	2.55261	2.92501	2.98038	3.07714	3.03444	2.91392	0.0938755
		-59.5	3.51142	2.52454	2.93872	3.20688	3.04539	0.209349			-59.5	2.51499	2.87882	2.91151	3.18926	3.10422	2.91976	0.11667
		-59.4	3.53098	2.45231	2.98967	3.14286	3.02896	0.223433			-59.4	2.58168	2.93161	3.04351	3.12471	3.11971	2.96024	0.100881
		-59.3	3.51795	2.42134	2.96675	3.14287	3.01223	0.228042			-59.3	2.41752	2.8946	2.89717	3.05676	3.07578	2.86837	0.119014
		-59.2	3.48664	2.49617	2.95399	3.18003	3.02921	0.208522			-59.2	2.568	2.90334	2.98898	3.19605	3.0706	2.94539	0.105972
		-59.1	3.51142	2.45488	2.8852	3.15112	3.00066	0.222621			-59.1	2.52868	2.92648	2.9603	3.08733	3.06803	2.91416	0.101129
		-59	3.51273	2.55807	2.97438	3.15732	3.05062	0.198608			-59	2.59194	2.92824	2.94595	3.10092	3.05252	2.92392	0.0890465
		-58.9	3.5362	2.51163	2.9438	3.14286	3.03362	0.213124			-58.9	2.48764	2.92293	2.94308	3.1417	3.11713	2.92249	0.117358
		-58.8	3.53098	2.49101	2.98202	3.17178	3.04395	0.216626			-58.8	2.50474	2.92276	2.97751	3.11452	3.1042	2.92474	0.111222
		-58.7	3.53881	2.48069	3.02788	3.16971	3.05427	0.219431			-58.7	2.53894	2.88233	2.93734	3.12131	3.11453	2.91889	0.106135
		-58.6	3.53098	2.47294	3.01005	3.17384	3.04695	0.220082			-58.6	2.52525	2.97228	2.95169	3.21982	3.06545	2.9469	0.11554
		-58.5	3.46838	2.48842	3.0075	3.1284	3.02318	0.2032			-58.5	2.50816	2.95421	2.95742	3.11111	3.12489	2.93116	0.111818
		-58.4	3.53359	2.44974	2.97183	3.20481	3.03999	0.228008			-58.4	2.5475	2.90171	2.96028	3.1383	3.0577	2.9211	0.101815
		-58.3	3.53359	2.48584	3.0075	3.12634	3.03832	0.215876			-58.3	2.48762	2.89805	2.97465	3.08054	3.08612	2.90539	0.110164
		-58.2	3.52707	2.50132	3.02533	3.21514	3.06721	0.215123			-58.2	2.52526	2.96701	2.9603	3.10432	3.04735	2.92085	0.102431
		-58.1	3.5375	2.42651	2.9438	3.13254	3.01009	0.2306			-58.1	2.54748	2.93002	2.95743	3.13149	3.06546	2.92638	0.101478
		-58	3.52576	2.4781	2.98458	3.1883	3.04419	0.21922			-58	2.48934	2.94781	2.9689	3.16547	3.10422	2.93515	0.118675
		-57.9	3.53098	2.51937	3.0075	3.15525	3.05328	0.209315			-57.9	2.4962	2.89451	2.9603	3.10771	3.10162	2.91207	0.111756
		-57.8	3.49968	2.49617	2.95399	3.1697	3.02989	0.21033			-57.8	2.61588	2.93516	2.94883	3.10773	3.08095	2.93771	0.0875016
		-57.7	3.50489	2.4781	3.02279	3.16764	3.04336	0.213776			-57.7	2.55603	2.92278	2.92586	3.16207	3.04994	2.92334	0.101965
		-57.6	3.48402	2.49101	2.90813	3.14493	3.00702	0.208686			-57.6	2.54577	2.93541	2.98614	3.17567	3.08612	2.94582	0.108234
		-57.5	3.49055	2.53744	2.98456	3.1821	3.04866	0.199693			-57.5	2.45685	2.97402	2.96316	3.10091	3.10162	2.91932	0.119373
		-57.4	3.49837	2.54519	2.99986	3.22752	3.06774	0.201792			-57.4	2.55946	2.90489	3.0177	3.16209	3.05512	2.93985	0.1036
		-57.3	3.51142	2.49874	2.92342	3.22339	3.03924	0.21649			-57.3	2.53894	2.93012	2.92587	3.10091	3.09904	2.91898	0.102501
		-57.2	3.46707	2.49874	2.90303	3.15936	3.00705	0.204943			-57.2	2.57313	2.88762	2.98898	3.16886	3.11455	2.94663	0.105442
		-57.1	3.51534	2.53228	2.99986	3.16146	3.05223	0.204021			-57.1	2.43463	2.92979	2.97752	3.17905	3.1068	2.92556	0.130545
		-57	3.48143	2.53486	3.00495	3.20068	3.05548	0.199188			-57	2.53039	2.96004	2.92299	3.1213	3.06544	2.92003	0.103702
		-56.9	3.48794	2.48842	2.96163	3.14699	3.02124	0.208382			-56.9	2.51842	2.95511	3.00334	3.09752	3.07838	2.93055	0.10618
		-56.8	3.47882	2.50133	2.95908	3.16557	3.0262	0.204996			-56.8	2.62272	2.89598	2.9402	3.1485	3.10937	2.94336	0.093462
		-56.7	3.5362	2.53744	3.05335	3.19449	3.08037	0.207426			-56.7	2.57656	2.95641	2.95456	3.1315	3.11196	2.9462	0.099655
		-56.6	3.46317	2.56839	2.97947	3.09537	3.0266	0.184276			-56.6	2.4654	2.88058	2.91726	3.1179	3.11454	2.89913	0.118966
		-56.5	3.52315	2.49874	3.02278	3.18416	3.05721	0.213365			-56.5	2.5509	2.9585	2.94308	3.12471	3.11969	2.93938	0.10444
		-56.4	3.48403	2.50647	3.01514	3.13254	3.03455	0.202253			-56.4	2.48764	2.94257	2.9689	3.18586	3.03702	2.9244	0.117072
		-56.3	3.45273	2.47293	3.02024	3.1821	3.032	0.206606			-56.3	2.55262	2.99189	2.94883	3.07034	3.14037	2.94081	0.102462
		-56.2	3.52968	2.56324	2.9336	3.13255	3.03977	0.201446			-56.2	2.47908	2.9301	2.97176	3.15867	3.10162	2.92825	0.11975
		-56.1	3.48272	2.48842	3.03043	3.12634	3.03197	0.205656			-56.1	2.53381	2.97415	2.95456	3.09414	3.12488	2.93631	0.105887
		-56	3.48012	2.55808	3.04317	3.15732	3.05967	0.191088			-56	2.4483	2.9493	2.97465	3.08394	3.1223	2.9157	0.121255
		-55.9	3.4749	2.48583	2.96418	3.14286	3.01694	0.206245			-55.9	2.56629	2.95817	2.98899	3.09752	3.04478	2.93115	0.0942851
		-55.8	3.41752	2.4652	3.00241	3.19035	3.01887	0.203131			-55.8	2.52525	3.02011	2.97751	3.17565	3.10938	2.96158	0.114398
		-55.7	3.52707	2.50907	3.09412	3.11807	3.06208	0.209404			-55.7	2.55091	2.9601	2.95167	3.13828	3.12231	2.94465	0.105919
		-55.6	3.52577	2.42651	3.01515	3.13048	3.02448	0.227336			-55.6	2.50302	2.94242	2.9603	3.15187	3.18172	2.94786	0.121321
		-55.5	3.45012	2.42393	3.04062	3.19861	3.02832	0.218393			-55.5	2.54749	2.9726	2.9775	3.15867	3.05512	2.94228	0.104302
		-55.4	3.51273	2.48585	2.98965	3.12427	3.02812	0.212059			-55.4	2.49789	2.91571	3.00621	3.13149	3.14813	2.93988	0.11841
		-55.3	3.47619	2.55034	2.95909	3.12635	3.02799	0.192235			-55.3	2.45343	2.94416	2.96603	3.19605	3.10679	2.93329	0.128569
		-55.2	3.51664	2.47552	2.98712	3.13666	3.02898	0.215538			-55.2	2.52867	2.98099	2.96604	3.07375	3.09645	2.92918	0.103279
		-55.1	3.52316	2.51421	3.04827	3.15939	3.06126	0.208649			-55.1	2.50302	2.94416	2.95742	3.22322	3.12747	2.95106	0.123697
		-55	3.53359	2.47295	2.99221	3.13459	3.03333	0.219133			-55	2.52183	2.96873	2.9402	3.10094	3.10679	2.9277	0.106924
		-54.9	3.39274	2.42394	2.98968	3.14699	2.98834	0.2056			-54.9	2.48934	2.89478	2.99474	3.19944	3.09646	2.93495	0.122433
		-54.8	3.4475	2.53744	2.94635	3.11188	3.01079	0.189109			-54.8	2.52013	2.92449	3.00046	3.1111	3.08353	2.92794	0.107083
		-54.7	3.48924	2.49358	2.97437	3.13874	3.02398	0.206846			-54.7	2.54236	2.9316	3.03777	3.13829	3.14039	2.95808	0.110812
		-54.6	3.45143	2.49617	2.97948	3.05613	2.9958	0.19603			-54.6	2.568	2.88599	2.95743	3.1315	3.11453	2.93149	0.102072
		-54.5	3.52707	2.4652	2.98965	3.14286	3.03119	0.219929			-54.5	2.54406	2.94211	2.97752	3.17906	3.16105	2.96076	0.114463
		-54.4	3.54793	2.44457	3.02788	3.18829	3.05217	0.229869			-54.4	2.52355	2.95463	2.95744	3.13488	3.06028	2.92616	0.10617
		-54.3	3.42534	2.43941	2.92597	3.12221	2.97823	0.206902			-54.3	2.53039	2.88939	2.96891	3.17566	3.10937	2.93474	0.112973
		-54.2	3.49186	2.48842	2.99221	3.19036	3.04071	0.210814			-54.2	2.4996	2.91768	3.02342	3.15869	3.13004	2.94588	0.11941
		-54.1	3.42274	2.51164	3.00496	3.16352	3.02572	0.191773			-54.1	2.46027	2.9673	2.98038	3.20282	3.1404	2.95023	0.130619
		-54	3.49578	2.53229	2.98456	3.14699	3.03991	0.200006			-54	2.48422	2.89812	2.97465	3.08733	3.14814	2.91849	0.116921
		-53.9	3.46056	2.50907	2.91324	3.18417	3.01676	0.202783			-53.9	2.51329	2.91242	2.96316	3.1383	3.09387	2.92421	0.11071
		-53.8	3.52315	2.58645	3.04062	3.11601	3.06656	0.191942			-53.8	2.54235	2.96383	2.98039	3.11452	3.1068	2.94158	0.104544
		-53.7	3.49968	2.47811	2.95654	3.15113	3.02136	0.213103			-53.7	2.52012	2.9299	2.98325	3.18585	3.1378	2.95138	0.117725
		-53.6	3.5036	2.40329	2.95909	3.13873	3.00118	0.229235			-53.6	2.51158	2.90182	2.92586	3.16206	3.11453	2.92317	0.114795
		-53.5	3.56359	2.52712	2.99222	3.14699	3.05748	0.214029			-53.5	2.54577	2.99048	2.98039	3.16547	3.09387	2.9552	0.107925
		-53.4	3.48012	2.50906	2.97948	3.15732	3.03149	0.202637			-53.4	2.51157	2.89463	2.95456	3.16547	3.10162	2.92557	0.114399
		-53.3	3.54403	2.46778	2.99476	3.13872	3.03632	0.222339			-53.3	2.49789	2.9267	3.01194	3.17227	3.08354	2.93847	0.117335
		-53.2	3.46055	2.54001	3.0126	3.20274	3.05398	0.194359			-53.2	2.56801	2.95475	3.0062	3.13828	3.11971	2.95739	0.103217
		-53.1	3.48143	2.52712	2.91322	3.13461	3.01409	0.200052			-53.1	2.46369	2.90538	2.92872	3.11791	3.04995	2.89313	0.114226
		-53	3.51272	2.4781	3.00496	3.12015	3.02898	0.213378			-53	2.58852	2.93208	3.02056	3.15188	3.10678	2.95996	0.100202
		-52.9	3.44882	2.49101	3.03553	3.14906	3.03111	0.200026			-52.9	2.55262	3.00432	3.00908	3.13149	3.09129	2.95776	0.104152
		-52.8	3.52707	2.49358	2.99476	3.1408	3.03905	0.213701			-52.8	2.49961	2.91936	3.00909	3.14509	3.1507	2.94477	0.119476
		-52.7	3.53228	2.5168	2.98967	3.13047	3.0423	0.20952			-52.7	2.54748	2.88594	2.98325	3.17565	3.03962	2.92639	0.105687
		-52.6	3.55185	2.47294	2.91067	3.11188	3.01184	0.224029			-52.6	2.49448	2.94063	3.03204	3.15866	3.07321	2.9398	0.11673
		-52.5	3.54663	2.52196	3.06865	3.14286	3.07003	0.21072			-52.5	2.52696	2.96705	3.00908	3.09753	3.07321	2.93477	0.10453
		-52.4	3.48534	2.48584	2.95398	3.19654	3.03043	0.211534			-52.4	2.5338	2.89656	2.97178	3.04996	3.13781	2.91798	0.104089
		-52.3	3.57533	2.38781	2.92851	3.15525	3.01173	0.247394			-52.3	2.52697	2.92116	2.9689	3.12471	3.08871	2.92609	0.106547
		-52.2	3.49577	2.45747	2.98712	3.15731	3.02442	0.216536			-52.2	2.49276	2.91968	3.02343	3.10433	3.11713	2.93147	0.115197
		-52.1	3.5049	2.55807	2.96418	3.18829	3.05386	0.199031			-52.1	2.49789	2.92626	2.9689	3.16547	3.12746	2.9372	0.118832
		-52	3.5375	2.51165	2.94891	3.15526	3.03833	0.213743			-52	2.57827	2.9528	3.00621	3.1281	3.07836	2.94875	0.0973501
		-51.9	3.59098	2.48326	2.96929	3.14699	3.04763	0.229083			-51.9	2.46883	2.9497	2.97751	3.04316	3.14814	2.91747	0.117246
		-51.8	3.49056	2.49358	3.01006	3.15733	3.03788	0.20741			-51.8	2.50473	2.94059	3.01195	3.16207	3.06287	2.93644	0.113794
		-51.7	3.49316	2.48069	3.00494	3.13254	3.02783	0.20964			-51.7	2.4996	2.90525	2.9775	3.19945	3.08096	2.93255	0.119053
		-51.6	3.50881	2.53744	2.92595	3.15112	3.03083	0.203587			-51.6	2.52867	2.91428	3.01483	3.1281	3.08613	2.9344	0.107709
		-51.5	3.55446	2.50648	2.98967	3.21307	3.06592	0.21968			-51.5	2.5338	2.94778	2.98325	3.07714	3.16364	2.94112	0.108569
		-51.4	3.55445	2.49873	3.0712	3.15526	3.06991	0.217622			-51.4	2.59536	2.91775	3.05212	3.10433	3.09129	2.95217	0.0951306
		-51.3	3.52967	2.50133	2.93107	3.15732	3.02985	0.215089			-51.3	2.55432	2.93346	2.95456	3.10772	3.10938	2.93189	0.101365
		-51.2	3.5049	2.49874	2.94635	3.16144	3.02786	0.21056			-51.2	2.515	2.92825	2.9316	3.10092	3.07062	2.90928	0.10466
		-51.1	3.45534	2.48841	2.91833	3.19449	3.01414	0.206711			-51.1	2.57997	2.91595	3.01769	3.19944	3.04478	2.95157	0.103405
		-51	3.51274	2.44973	2.98966	3.15938	3.02788	0.221378			-51	2.54578	2.91021	2.98612	3.1417	3.14297	2.94536	0.109582
		-50.9	3.56229	2.5426	2.99731	3.14079	3.06075	0.210248			-50.9	2.54236	2.93705	3.06935	3.10432	3.10162	2.95094	0.106627
		-50.8	3.53881	2.49101	2.97692	3.16557	3.04308	0.217928			-50.8	2.45685	2.91404	2.98325	3.17906	3.07837	2.92231	0.124641
		-50.7	3.55316	2.491	2.92341	3.12428	3.02296	0.220656			-50.7	2.56458	3.00248	2.9402	3.12131	3.11971	2.94966	0.102359
		-50.6	3.49316	2.54259	3.0075	3.20481	3.06202	0.199803			-50.6	2.52184	2.90883	2.98614	3.07375	3.11454	2.92102	0.10595
		-50.5	3.5362	2.53228	3.0075	3.12633	3.05058	0.206571			-50.5	2.55774	2.94224	2.9689	3.09752	3.11196	2.93567	0.100313
		-50.4	3.45403	2.49874	2.93107	3.07678	2.99016	0.197413			-50.4	2.5492	2.93132	2.89142	3.15528	3.12488	2.93042	0.108449
		-50.3	3.57403	2.45231	2.99986	3.23165	3.06446	0.235674			-50.3	2.47225	2.89096	2.94595	3.07035	3.08612	2.89312	0.111487
		-50.2	3.50489	2.59934	3.01006	3.1346	3.06222	0.186675			-50.2	2.56116	2.9494	2.9976	3.18245	3.10938	2.96	0.107796
		-50.1	3.54664	2.44198	3.05337	3.13461	3.04415	0.227921			-50.1	2.51842	2.91585	2.96603	3.1417	3.15588	2.93957	0.115386
		-50	3.46056	2.53486	2.99986	3.14699	3.03557	0.192573			-50	2.55089	2.94932	2.98326	3.06695	3.02928	2.91594	0.0934221
		-49.9	3.54663	2.48585	2.97947	3.16144	3.04335	0.220251			-49.9	2.51328	2.91061	2.97465	3.18245	3.13781	2.94376	0.118742
		-49.8	3.51402	2.48069	2.99986	3.14906	3.03591	0.214273			-49.8	2.56116	2.94567	2.95742	3.18925	3.09386	2.94947	0.107053
		-49.7	3.45925	2.49874	2.94126	3.15525	3.01362	0.201863			-49.7	2.55603	2.98131	2.96605	3.13151	3.00602	2.92818	0.0975069
		-49.6	3.51142	2.53485	3.01768	3.12841	3.04809	0.201136			-49.6	2.51671	2.97939	2.90865	3.15528	3.11195	2.9344	0.113461
		-49.5	3.52577	2.50133	2.98712	3.16145	3.04392	0.212842			-49.5	2.50473	2.94224	2.96316	3.10771	3.07836	2.91924	0.108425
		-49.4	3.49316	2.48326	2.97439	3.15939	3.02755	0.210802			-49.4	2.56971	2.94413	2.99473	3.12471	3.00344	2.92734	0.0941992
		-49.3	3.48926	2.46521	2.96166	3.14699	3.01578	0.213591			-49.3	2.4996	2.92308	2.9115	3.13489	3.10681	2.91518	0.113529
		-49.2	3.58968	2.45489	2.97948	3.23371	3.06444	0.238624			-49.2	2.55433	2.9084	2.95742	3.09413	3.10421	2.9237	0.0998596
		-49.1	3.42143	2.44457	2.97693	3.23372	3.01916	0.212091			-49.1	2.48764	2.94032	2.94882	3.17906	3.06028	2.92322	0.117244
		-49	3.48142	2.52196	2.94635	3.15112	3.02522	0.200719			-49	2.53039	2.9584	2.95455	3.17227	3.09645	2.94241	0.111068
		-48.9	3.46576	2.47296	2.97183	3.1821	3.02316	0.209466			-48.9	2.50302	2.96679	2.9402	3.1383	3.07321	2.9243	0.111243
		-48.8	3.4723	2.49358	2.9438	3.21927	3.03224	0.209485			-48.8	2.50645	2.89987	2.96604	3.19264	3.14039	2.94108	0.121291
		-48.7	3.52185	2.42651	3.0024	3.14079	3.02289	0.22711			-48.7	2.6022	2.96504	2.94308	3.04996	3.08871	2.9298	0.0861479
		-48.6	3.53098	2.59677	3.0661	3.18623	3.09502	0.193104			-48.6	2.58511	2.95465	2.92299	3.13149	3.09905	2.93866	0.0970591
		-48.5	3.51794	2.51681	2.92087	3.18003	3.03391	0.211306			-48.5	2.49619	2.91251	2.96891	3.19945	3.05769	2.92695	0.118084
		-48.4	3.45924	2.44715	2.99476	3.18417	3.02133	0.213827			-48.4	2.59365	2.91732	2.93735	3.19605	3.14554	2.95798	0.106458
		-48.3	3.49185	2.50131	3.01259	3.18417	3.04748	0.207297			-48.3	2.47567	2.93371	2.93733	3.17227	3.09129	2.92205	0.120598
		-48.2	3.5036	2.57098	2.97947	3.1697	3.05594	0.194588			-48.2	2.5868	2.91059	2.96316	3.07713	3.11453	2.93045	0.0935307
		-48.1	3.52707	2.51422	3.05336	3.15112	3.06144	0.20904			-48.1	2.56801	2.97767	2.87995	3.11453	3.11196	2.93042	0.100741
		-48	3.45664	2.49874	2.97438	3.18622	3.029	0.202433			-48	2.59024	2.86989	2.96318	3.22322	3.12746	2.9548	0.110011
		-47.9	3.50098	2.51164	3.0075	3.16557	3.04642	0.205817			-47.9	2.44831	2.92314	3.01195	3.06695	3.11714	2.9135	0.120665
		-47.8	3.42012	2.52454	2.97692	3.1408	3.0156	0.187516			-47.8	2.54236	2.8981	2.95743	3.10771	3.14556	2.93023	0.107257
		-47.7	3.54533	2.51938	3.05082	3.1697	3.07131	0.212019			-47.7	2.51841	2.90337	2.9603	3.1315	3.04478	2.91167	0.105624
		-47.6	3.43317	2.47553	3.02024	3.17177	3.02518	0.202089			-47.6	2.53209	2.91615	2.9689	3.19605	3.12228	2.94709	0.115397
		-47.5	3.51012	2.50906	2.96163	3.18416	3.04124	0.210124			-47.5	2.46883	2.94081	2.95743	3.15188	3.10421	2.92463	0.121034
		-47.4	3.51533	2.50133	2.99477	3.09537	3.0267	0.208269			-47.4	2.54406	2.91769	2.99186	3.18585	3.1042	2.94873	0.111125
		-47.3	3.49315	2.53228	3.05082	3.18416	3.0651	0.200314			-47.3	2.49105	2.94606	3.00046	3.08393	3.07837	2.91997	0.110251
		-47.2	3.49316	2.51423	3.01515	3.20481	3.05683	0.205838			-47.2	2.49106	2.94409	2.97751	3.12471	3.10421	2.92831	0.114755
		-47.1	3.49707	2.52454	2.99729	3.0933	3.02805	0.19973			-47.1	2.52354	2.9813	2.93734	3.14169	3.11971	2.94072	0.111383
		-47	3.46968	2.46004	3.0177	3.09331	3.01018	0.20832			-47	2.42437	2.92653	2.96317	3.20624	3.03186	2.91043	0.13068
		-46.9	3.54141	2.54261	2.99732	3.11188	3.04831	0.205249			-46.9	2.43804	2.91031	2.90003	3.11111	3.11713	2.89532	0.123514
		-46.8	3.45012	2.49875	2.99221	3.11395	3.01376	0.197093			-46.8	2.54064	2.94951	2.9775	3.09752	3.0732	2.92767	0.100693
		-46.7	3.43578	2.51939	2.93362	3.20894	3.02443	0.197181			-46.7	2.45515	3.0236	2.97751	3.12811	3.09387	2.93565	0.122972
		-46.6	3.49446	2.43168	3.0457	3.11189	3.02093	0.219911			-46.6	2.50474	2.93883	2.98039	3.19265	3.1042	2.94416	0.1187
		-46.5	3.47491	2.5297	2.98201	3.1222	3.02721	0.195579			-46.5	2.50473	2.90874	3.00047	3.11451	3.14297	2.93428	0.115233
		-46.4	3.56098	2.43166	2.97438	3.1697	3.03418	0.234963			-46.4	2.56117	2.96756	2.90577	3.18926	3.09387	2.94353	0.107515
		-46.3	3.47882	2.48067	2.98713	3.13047	3.01927	0.207097			-46.3	2.50302	2.91031	2.98613	3.08392	3.08096	2.91287	0.107438
		-46.2	3.51142	2.4394	2.99476	3.10776	3.01333	0.221123			-46.2	2.57485	2.93356	2.99187	3.21643	3.07579	2.9585	0.107054
		-46.1	3.49316	2.5168	2.98713	3.18004	3.04428	0.204415			-46.1	2.52354	2.93356	2.93448	3.1281	3.02152	2.90824	0.10259
		-46	3.44099	2.46521	2.99731	3.1759	3.01985	0.206123			-46	2.52526	2.95826	2.94882	3.08734	3.08869	2.92167	0.103576
		-45.9	3.48925	2.48069	2.95655	3.04374	2.99256	0.206687			-45.9	2.54918	2.92449	2.97752	3.20624	3.09128	2.94974	0.111283
		-45.8	3.52316	2.49099	2.96164	3.15319	3.03224	0.21478			-45.8	2.515	2.93175	2.92586	3.17228	3.06545	2.92207	0.111575
		-45.7	3.49316	2.50906	2.98712	3.18623	3.04389	0.206433			-45.7	2.52868	2.96727	2.96605	3.16547	3.11712	2.94892	0.112343
		-45.6	3.49968	2.46778	3.02533	3.1697	3.04063	0.21521			-45.6	2.49448	2.95816	3.00334	3.16207	3.11972	2.94755	0.119196
		-45.5	3.5023	2.48326	2.9591	3.1346	3.01981	0.211649			-45.5	2.5338	2.94947	2.81394	3.16547	3.07836	2.90821	0.110884
		-45.4	3.48272	2.51164	2.99986	3.10157	3.02395	0.199904			-45.4	2.54065	2.94762	2.98038	3.16547	3.1533	2.95748	0.113131
		-45.3	3.47751	2.49874	2.97948	3.18417	3.03497	0.205898			-45.3	2.56458	2.93725	2.9775	3.17906	3.16105	2.96389	0.110795
		-45.2	3.51273	2.52712	3.0126	3.15526	3.05193	0.204119			-45.2	2.56288	2.94046	2.95169	3.10433	3.13263	2.9384	0.101601
		-45.1	3.46316	2.50391	3.02024	3.13667	3.031	0.199139			-45.1	2.52184	2.95117	2.8656	3.1417	3.08871	2.9138	0.109518
		-45	3.48141	2.50389	2.95908	3.13666	3.02026	0.203427			-45	2.54064	2.88027	2.94596	3.14847	3.14814	2.9327	0.111715
		-44.9	3.48533	2.47811	2.9591	3.13873	3.01532	0.209741			-44.9	2.61076	2.93002	2.97465	3.03977	3.09904	2.93085	0.085008
		-44.8	3.52316	2.56065	3.0177	3.13874	3.06006	0.198296			-44.8	2.5492	2.89654	2.92299	3.21981	3.16363	2.95043	0.118883
		-44.7	3.53751	2.52196	2.96672	3.17177	3.04949	0.211787			-44.7	2.51329	2.96741	2.93446	3.12472	3.02929	2.91383	0.105245
		-44.6	3.4723	2.48842	2.94889	3.16144	3.01776	0.206597			-44.6	2.51842	2.9087	2.96605	3.18925	3.14038	2.94456	0.118652
		-44.5	3.52708	2.41877	2.98713	3.16145	3.02361	0.230876			-44.5	2.515	2.95324	2.9689	3.15527	3.13004	2.94449	0.11489
		-44.4	3.47229	2.53744	2.96673	3.22546	3.05048	0.199744			-44.4	2.47225	2.94767	2.989	3.10092	3.10162	2.92229	0.116555
		-44.3	3.49186	2.48585	3.02278	3.0933	3.02345	0.206822			-44.3	2.55261	2.97081	2.97464	3.21643	3.12747	2.96839	0.113963
		-44.2	3.58836	2.5555	2.92087	3.14287	3.0519	0.215958			-44.2	2.48935	2.94048	3.04639	3.15866	2.98536	2.92405	0.114674
		-44.1	3.48141	2.50132	2.93616	3.1759	3.0237	0.206803			-44.1	2.60049	2.87674	3.02631	3.14847	3.19207	2.96882	0.107136
		-44	3.52707	2.46005	2.98711	3.15524	3.03237	0.221626			-44	2.46712	2.94767	3.05787	3.07714	3.0422	2.9184	0.114997
		-43.9	3.52446	2.47036	2.97948	3.17589	3.03755	0.220093			-43.9	2.52525	2.92315	2.97465	3.08054	3.07579	2.91587	0.102171
		-43.8	3.56359	2.51938	2.93616	3.15524	3.04359	0.217792			-43.8	2.54064	2.92305	2.92012	3.18586	3.08612	2.93116	0.109903
		-43.7	3.50621	2.53744	3.01005	3.18416	3.05946	0.202089			-43.7	2.50302	2.92475	3.01482	3.15188	3.13005	2.9449	0.117829
		-43.6	3.48012	2.51164	2.93871	3.15319	3.02091	0.202994			-43.6	2.5338	2.90898	2.98899	3.13489	3.04478	2.92229	0.103865
		-43.5	3.46968	2.42909	2.92852	3.15938	2.99667	0.219281			-43.5	2.46712	2.92485	2.9603	3.10094	3.09129	2.9089	0.115805
		-43.4	3.56359	2.47295	3.0228	3.16972	3.05726	0.225762			-43.4	2.59536	2.91932	3.03203	3.04996	3.06545	2.93243	0.0880957
		-43.3	3.49447	2.44714	2.92343	3.12222	2.99681	0.21812			-43.3	2.45515	2.93379	2.96315	3.12129	3.1533	2.92534	0.125089
		-43.2	3.51402	2.49874	2.94125	3.2172	3.0428	0.215789			-43.2	2.53039	2.92146	2.97751	3.15869	3.04478	2.92657	0.106638
		-43.1	3.47882	2.47295	2.97947	3.15732	3.02214	0.21021			-43.1	2.59536	2.92619	3.055	3.11451	3.13261	2.96473	0.0991669
		-43	3.52968	2.47552	2.98712	3.15525	3.03689	0.218797			-43	2.59879	2.9144	2.97178	3.11791	3.10162	2.9409	0.093771
		-42.9	3.48795	2.50648	2.98202	3.1635	3.03499	0.2049			-42.9	2.44488	2.9016	3.04925	3.04658	3.07319	2.9031	0.1185
		-42.8	3.55185	2.50133	2.98203	3.15939	3.04865	0.217844			-42.8	2.55774	2.93888	2.95455	3.16208	3.1533	2.95331	0.109605
		-42.7	3.47882	2.47552	2.98967	3.16557	3.02739	0.209934			-42.7	2.54235	2.92855	2.95455	3.08733	3.07062	2.91668	0.0986196
		-42.6	3.54141	2.52969	2.99986	3.19862	3.0674	0.211266			-42.6	2.54064	2.92316	2.96316	3.14507	3.10937	2.93628	0.107467
		-42.5	3.54141	2.46263	2.99476	3.18829	3.04677	0.225209			-42.5	2.50474	2.89462	3.03777	3.09073	3.1223	2.93003	0.113253
		-42.4	3.49837	2.57356	2.97948	3.14905	3.05011	0.192099			-42.4	2.65521	2.9512	2.96029	3.11451	3.06287	2.94881	0.0796244
		-42.3	3.52185	2.43424	2.95145	3.14491	3.01311	0.2264			-42.3	2.52525	2.89592	2.98613	3.09073	3.07061	2.91373	0.103057
		-42.2	3.51664	2.48326	3.03808	3.16764	3.05141	0.214654			-42.2	2.57143	2.94955	2.98325	3.14849	3.07839	2.94622	0.100058
		-42.1	3.54663	2.49616	2.96162	3.13873	3.03578	0.21761			-42.1	2.53895	2.91936	2.97465	3.16886	3.08871	2.93811	0.108845
		-42	3.57011	2.48325	2.98711	3.1346	3.04377	0.224105			-42	2.55262	2.86289	2.95454	3.08054	3.15071	2.92026	0.104504
		-41.9	3.48663	2.55806	2.96418	3.19242	3.05033	0.195852			-41.9	2.4483	2.98114	2.99186	3.1281	3.06545	2.92297	0.121618
		-41.8	3.48533	2.44715	2.97183	3.10775	3.00301	0.21478			-41.8	2.51158	2.93195	2.9775	3.1349	3.10937	2.93306	0.112127
		-41.7	3.57532	2.46004	2.97692	3.18417	3.04911	0.232262			-41.7	2.60563	2.8948	2.98612	3.13492	3.06287	2.93687	0.091928
		-41.6	3.59879	2.46779	2.94637	3.10983	3.03069	0.233269			-41.6	2.55774	2.94785	2.9316	3.1451	3.15589	2.94764	0.108314
		-41.5	3.58446	2.44457	2.96419	3.14081	3.03351	0.23571			-41.5	2.50986	2.89635	2.96029	3.07036	3.12489	2.91235	0.108326
		-41.4	3.48664	2.49874	2.99986	3.19861	3.04596	0.207983			-41.4	2.52012	2.94774	2.98899	3.1485	3.08871	2.93881	0.110529
		-41.3	3.52186	2.51423	2.96162	3.12013	3.02946	0.208316			-41.3	2.60904	2.92975	3.05212	3.17226	3.06027	2.96469	0.0968426
		-41.2	3.52838	2.48068	2.99986	3.10776	3.02917	0.215462			-41.2	2.53381	2.9493	2.97177	3.05677	3.1352	2.92937	0.104226
		-41.1	3.57141	2.53228	2.93616	3.17797	3.05445	0.217786			-41.1	2.50816	2.89823	2.95741	3.1213	3.06027	2.90908	0.107491
		-41	3.54532	2.45746	2.98712	3.15939	3.03732	0.225782			-41	2.54236	2.93691	2.98039	3.13489	3.18689	2.95629	0.11344
		-40.9	3.50881	2.46778	2.94124	3.17383	3.02292	0.218655			-40.9	2.55604	2.9724	2.89716	3.11451	3.0603	2.92008	0.0982981
		-40.8	3.51925	2.50649	3.01262	3.16765	3.0515	0.210324			-40.8	2.54408	2.86628	2.87422	3.06016	3.03443	2.87583	0.0920016
		-40.7	3.53489	2.50648	3.05082	3.1759	3.06702	0.213156			-40.7	2.53894	2.91048	2.9976	3.07714	3.10679	2.92619	0.102644
		-40.6	3.52577	2.48326	2.96418	3.16352	3.03418	0.217332			-40.6	2.5338	2.94404	2.99473	3.13149	3.14297	2.94941	0.110779
		-40.5	3.53881	2.491	2.98965	3.14079	3.04006	0.216585			-40.5	2.5338	2.92452	2.88282	3.10771	3.03444	2.89666	0.0990349
		-40.4	3.45274	2.46779	2.96673	3.14699	3.00856	0.206284			-40.4	2.50986	2.9475	2.96316	3.06355	3.13004	2.92282	0.108517
		-40.3	3.54403	2.53229	2.98712	3.13046	3.04847	0.208668			-40.3	2.53552	2.91769	2.94882	3.10432	3.09127	2.91952	0.102949
		-40.2	3.47229	2.51939	3.03298	3.19241	3.05427	0.200079			-40.2	2.50815	2.93877	2.94308	3.17906	3.05252	2.92432	0.112935
		-40.1	3.52185	2.50647	2.94636	3.13668	3.02784	0.211021			-40.1	2.53552	2.94601	2.89428	3.09753	3.1688	2.92843	0.110052
		-40	3.52577	2.48326	3.02279	3.14906	3.04522	0.21564			-40	2.52354	2.94065	2.98613	3.1383	3.08612	2.93495	0.108653
		-39.9	3.49837	2.45231	2.98202	3.21719	3.03748	0.221776			-39.9	2.49789	2.93863	2.89429	3.18586	3.14039	2.93141	0.122022
		-39.8	3.51272	2.52196	2.96164	3.18003	3.04409	0.207668			-39.8	2.52525	2.97782	2.96602	3.10432	3.08096	2.93087	0.105019
		-39.7	3.44752	2.5168	2.92596	3.18622	3.01912	0.198422			-39.7	2.53039	2.91382	2.97752	3.11114	3.11713	2.93	0.107247
		-39.6	3.43838	2.5168	3.04318	3.14906	3.03685	0.19242			-39.6	2.46028	2.89135	2.95743	3.1315	3.10937	2.90999	0.121173
		-39.5	3.55968	2.53228	3.01514	3.12222	3.05733	0.210955			-39.5	2.4996	2.90172	2.94021	3.09073	3.07062	2.90057	0.106636
		-39.4	3.46839	2.54519	2.9336	3.19241	3.0349	0.196383			-39.4	2.57996	2.94246	2.90004	3.14847	3.10936	2.93606	0.100821
		-39.3	3.4736	2.50907	3.00495	3.1759	3.04088	0.201989			-39.3	2.50644	2.96344	3.02628	3.10772	3.09387	2.93955	0.111304
		-39.2	3.49968	2.48842	2.96163	3.17796	3.03192	0.212221			-39.2	2.49619	2.91244	2.93734	3.10772	3.14039	2.91881	0.114843
		-39.1	3.49577	2.47036	2.96164	3.14493	3.01817	0.21359			-39.1	2.56458	2.95827	2.94308	3.14508	3.05252	2.93271	0.098928
		-39	3.46186	2.54002	3.00494	3.16764	3.04362	0.19266			-39	2.53723	2.94593	2.96892	3.05336	3.06544	2.91418	0.0970426
		-38.9	3.45665	2.48842	2.93616	3.15937	3.01015	0.203981			-38.9	2.53381	2.89465	2.93735	3.21643	3.10163	2.93677	0.116092
		-38.8	3.57533	2.54259	3.01515	3.15732	3.0726	0.212942			-38.8	2.53379	2.89826	2.97465	3.09412	3.0577	2.9117	0.100387
		-38.7	3.48404	2.50648	3.0228	3.10364	3.02924	0.201182			-38.7	2.54235	2.94766	2.96603	3.16207	3.09648	2.94292	0.107847
		-38.6	3.47361	2.46262	2.9973	3.21719	3.03768	0.214977			-38.6	2.4141	2.96379	2.97465	3.08393	3.12747	2.91279	0.128548
		-38.5	3.5662	2.50906	2.96928	3.14079	3.04633	0.218667			-38.5	2.5492	2.94423	2.9976	3.1315	3.08096	2.9407	0.103102
		-38.4	3.49838	2.56839	3.02788	3.1883	3.07073	0.193841			-38.4	2.55261	2.93541	2.92301	3.09074	3.08612	2.91758	0.0979642
		-38.3	3.45534	2.48068	3.0177	3.11189	3.0164	0.201823			-38.3	2.45173	2.98313	3.02917	3.19944	3.18688	2.97007	0.136374
		-38.2	3.5062	2.55034	2.98713	3.16764	3.05283	0.199067			-38.2	2.48934	2.98138	2.87707	3.10432	3.0732	2.90506	0.111222
		-38.1	3.51402	2.50132	3.02278	3.17797	3.05402	0.210835			-38.1	2.51671	2.96712	2.98613	3.18924	3.12488	2.95682	0.11767
		-38	3.48143	2.54519	2.97183	3.16557	3.04101	0.195811			-38	2.53723	2.9459	2.97752	3.14508	3.09905	2.94096	0.107475
		-37.9	3.51272	2.49101	2.97694	3.14493	3.0314	0.212043			-37.9	2.4654	2.95471	2.9201	3.09753	3.11971	2.91149	0.118089
		-37.8	3.5062	2.49617	2.97947	3.18417	3.0415	0.211647			-37.8	2.48079	2.96879	2.94594	3.15188	3.07321	2.92412	0.116858
		-37.7	3.56227	2.47553	3.01769	3.1222	3.04442	0.223341			-37.7	2.50303	2.95829	2.97177	3.15189	3.14555	2.94611	0.118163
		-37.6	3.40968	2.46262	2.97437	3.15112	2.99945	0.200023			-37.6	2.51671	2.97584	2.94019	3.14168	3.08354	2.93159	0.109859
		-37.5	3.5375	2.49359	2.96164	3.08711	3.01996	0.214636			-37.5	2.42095	2.96177	3.00334	3.14168	3.17396	2.94034	0.135889
		-37.4	3.48533	2.51423	2.97692	3.13667	3.02829	0.201563			-37.4	2.55775	2.9459	2.91725	3.14169	3.12231	2.93698	0.105009
		-37.3	3.51794	2.47552	3.00496	3.09537	3.02345	0.214139			-37.3	2.43634	2.9546	3.03203	3.14849	3.13522	2.94134	0.131135
		-37.2	3.49055	2.45231	2.97691	3.15319	3.01824	0.216656			-37.2	2.54748	2.94236	2.95743	3.08734	3.11196	2.92931	0.101265
		-37.1	3.52185	2.45231	2.98458	3.14286	3.0254	0.221803			-37.1	2.47909	2.90148	2.89429	3.09753	3.13521	2.90152	0.116519
		-37	3.53228	2.5168	3.0075	3.12635	3.04573	0.209057			-37	2.47053	2.92116	2.96891	3.14508	3.12488	2.92611	0.121833
		-36.9	3.48924	2.4549	2.95653	3.12841	3.00727	0.214992			-36.9	2.53209	2.99179	2.96029	3.1349	3.03961	2.93174	0.104175
		-36.8	3.48794	2.42135	3.00494	3.14286	3.01427	0.222212			-36.8	2.52012	2.88403	2.9804	3.1315	3.14039	2.93129	0.113471
		-36.7	3.51794	2.44715	2.98201	3.1697	3.0292	0.223535			-36.7	2.60733	2.96323	2.91725	3.17567	3.15072	2.96284	0.102239
		-36.6	3.45273	2.49616	2.95655	3.08298	2.9971	0.19739			-36.6	2.55603	2.94394	3.02343	3.17566	3.09904	2.95962	0.108006
		-36.5	3.51011	2.47295	2.99731	3.12633	3.02668	0.214305			-36.5	2.51158	2.94237	2.9316	3.15527	3.09387	2.92694	0.112424
		-36.4	3.46316	2.51163	3.0177	3.10363	3.02403	0.196163			-36.4	2.49448	2.90351	2.93734	3.10432	3.17656	2.92324	0.118614
		-36.3	3.55576	2.49875	2.94126	3.13873	3.03363	0.219524			-36.3	2.50986	2.91213	2.99187	3.20624	3.13521	2.95106	0.121833
		-36.2	3.46186	2.41619	2.92087	3.17383	2.99319	0.221819			-36.2	2.58853	2.92676	2.96316	3.18245	3.20757	2.97369	0.111567
		-36.1	3.51142	2.50907	2.96927	3.10156	3.02283	0.206506			-36.1	2.52697	2.98658	3.00622	3.18585	3.11971	2.96507	0.115488
		-36	3.46838	2.49358	2.95654	3.14699	3.01637	0.203768			-36	2.48593	2.90691	2.95456	3.15189	3.15588	2.93103	0.122186
		-35.9	3.53882	2.49359	2.97948	3.13667	3.03714	0.216094			-35.9	2.52354	2.91423	2.94021	3.19263	3.09386	2.93289	0.114312
		-35.8	3.49577	2.52455	2.9438	3.15731	3.03036	0.203318			-35.8	2.57485	2.95276	2.99186	3.23342	3.16881	2.98434	0.115066
		-35.7	3.50882	2.50906	3.00242	3.11601	3.03408	0.2059			-35.7	2.50645	2.93881	2.97465	3.16207	3.13781	2.94395	0.117799
		-35.6	3.52054	2.49617	3.04317	3.19242	3.06308	0.213656			-35.6	2.55603	2.93554	2.98325	3.14847	3.09645	2.94395	0.104207
		-35.5	3.48664	2.41362	3.01768	3.1408	3.01469	0.223594			-35.5	2.51841	2.91776	2.95456	3.11452	3.08613	2.91827	0.106745
		-35.4	3.54794	2.50648	2.94889	3.17591	3.04481	0.217815			-35.4	2.47737	2.92481	2.95742	3.16886	3.15847	2.93739	0.125427
		-35.3	3.43708	2.52712	2.96929	3.21101	3.03612	0.194701			-35.3	2.55775	2.92996	2.99473	3.14508	3.06545	2.9386	0.101734
		-35.2	3.56097	2.46778	3.02279	3.10776	3.03983	0.224302			-35.2	2.57827	2.98849	3.00333	3.14846	3.1197	2.96765	0.10226
		-35.1	3.44099	2.45488	3.02533	3.14906	3.01757	0.206811			-35.1	2.46882	2.91217	2.96603	3.15527	3.10162	2.92078	0.121259
		-35	3.53098	2.49101	3.04061	3.14906	3.05292	0.214803			-35	2.54577	2.89676	3.02343	3.21303	3.1869	2.97318	0.121294
		-34.9	3.51142	2.53486	2.92343	3.14906	3.02969	0.204625			-34.9	2.47567	2.89271	2.98323	3.11791	3.0267	2.89924	0.111932
		-34.8	3.5349	2.5039	3.00496	3.22752	3.06782	0.217107			-34.8	2.50302	2.95876	3.04638	3.21302	3.1223	2.9687	0.12375
		-34.7	3.51532	2.45748	2.98712	3.16558	3.03137	0.220517			-34.7	2.53039	2.91412	2.93735	3.07716	3.10937	2.91368	0.103075
		-34.6	3.54794	2.50133	2.95399	3.20894	3.05305	0.220496			-34.6	2.51158	2.94236	3.01482	3.1383	3.06286	2.93398	0.110314
		-34.5	3.51142	2.491	3.01006	3.13873	3.0378	0.211003			-34.5	2.53722	2.91421	3.02343	3.12131	3.14038	2.94731	0.110139
		-34.4	3.55707	2.49615	2.98456	3.16557	3.05084	0.220133			-34.4	2.47225	2.9036	3.00622	3.11793	3.07836	2.91567	0.116693
		-34.3	3.51142	2.48068	2.99221	3.20894	3.04831	0.217107			-34.3	2.52183	2.94068	3.04926	3.15869	3.11971	2.95803	0.115174
		-34.2	3.57011	2.49359	2.98711	3.15112	3.05048	0.22254			-34.2	2.5355	2.93715	2.9316	3.13151	3.03444	2.91404	0.10147
		-34.1	3.47882	2.51938	2.93616	3.16764	3.0255	0.20204			-34.1	2.4654	2.9071	3.04639	3.08393	3.05769	2.9121	0.115827
		-34	3.55837	2.52712	2.97438	3.16146	3.05533	0.214062			-34	2.55946	2.88944	2.9689	3.12131	3.1042	2.92866	0.101832
		-33.9	3.45012	2.51939	3.02535	3.19862	3.04837	0.196709			-33.9	2.52013	2.95472	3.06359	3.08393	3.1223	2.94893	0.110755
		-33.8	3.54663	2.53486	2.99477	3.16765	3.06098	0.209845			-33.8	2.55091	2.94049	2.95456	3.08734	3.06803	2.92027	0.0968919
		-33.7	3.50229	2.51939	2.93872	3.15732	3.02943	0.205816			-33.7	2.5338	2.94979	2.98613	3.06015	3.07836	2.92164	0.0997795
		-33.6	3.54795	2.44198	2.96674	3.18208	3.03469	0.231134			-33.6	2.4637	2.87882	3.0062	3.22322	3.17656	2.9497	0.136142
		-33.5	3.56358	2.46262	2.99476	3.09537	3.02908	0.225858			-33.5	2.55775	2.91783	3.00909	3.03299	3.04994	2.91352	0.0918177
		-33.4	3.55315	2.55035	2.97183	3.22339	3.07468	0.211452			-33.4	2.56801	2.8859	3.00908	3.15869	3.08871	2.94208	0.103921
		-33.3	3.53881	2.47294	2.95145	3.15525	3.02961	0.221935			-33.3	2.50986	2.87508	3.0177	3.12472	3.05252	2.91597	0.109354
		-33.2	3.47751	2.4549	3.00495	3.1635	3.02522	0.213963			-33.2	2.55944	2.93862	2.95457	3.13489	3.11712	2.94093	0.103536
		-33.1	3.52446	2.51681	2.91068	3.147	3.02474	0.21128			-33.1	2.54406	2.91411	2.99759	3.07716	3.06804	2.92019	0.0984884
		-33	3.53229	2.4678	2.93616	3.19654	3.0332	0.224512			-33	2.4979	2.88915	2.94594	3.15189	3.13781	2.92454	0.118511
		-32.9	3.55576	2.46779	3.0126	3.12015	3.03908	0.223721			-32.9	2.47395	2.96744	3.0177	3.16547	3.1042	2.94575	0.122805
		-32.8	3.5023	2.51163	2.9591	3.20689	3.04498	0.209602			-32.8	2.52013	2.94248	2.98038	3.11791	3.02411	2.917	0.103443
		-32.7	3.51142	2.53485	2.91323	3.15319	3.02817	0.20529			-32.7	2.5851	2.87894	2.95456	3.12131	3.0887	2.92572	0.0958797
		-32.6	3.49577	2.49359	2.99986	3.14906	3.03457	0.208101			-32.6	2.50132	2.92292	2.92587	3.1179	3.07578	2.90876	0.109118
		-32.5	3.5036	2.46005	2.8903	3.15732	3.00282	0.22021			-32.5	2.52012	2.92817	3.0263	3.10092	3.1533	2.94577	0.112941
		-32.4	3.53359	2.5142	2.98202	3.19654	3.05659	0.213475			-32.4	2.5167	2.89806	3.0263	3.1281	3.03961	2.92175	0.107709
		-32.3	3.58185	2.48068	2.96674	3.15112	3.0451	0.228044			-32.3	2.57485	2.92992	2.96603	3.14169	3.12747	2.94799	0.102377
		-32.2	3.43708	2.52712	3.04317	3.15939	3.04169	0.190388			-32.2	2.51328	2.89635	2.94595	3.13149	3.09904	2.91722	0.110318
		-32.1	3.60533	2.43167	2.94379	3.16764	3.03711	0.244127			-32.1	2.50303	2.86974	3.00621	3.1349	3.06805	2.91639	0.112219
		-32	3.54402	2.43941	2.98966	3.11395	3.02176	0.227562			-32	2.59536	2.95288	2.98325	3.1179	3.09646	2.94917	0.0939463
		-31.9	3.48794	2.46004	2.9489	3.18417	3.02026	0.216895			-31.9	2.56458	2.96155	2.989	3.20622	3.10422	2.96512	0.1092
		-31.8	3.45664	2.40329	2.98458	3.10775	2.98807	0.219062			-31.8	2.51159	2.90363	2.9804	3.1213	3.04994	2.91337	0.106749
		-31.7	3.5675	2.47295	2.95145	3.13461	3.03163	0.226626			-31.7	2.55603	2.94567	2.9316	3.18586	3.09129	2.94209	0.107435
		-31.6	3.37969	2.47037	2.96164	3.18828	3	0.196127			-31.6	2.52525	2.88923	2.92301	3.10092	3.06546	2.90078	0.102182
		-31.5	3.49056	2.48842	2.95399	3.12015	3.01328	0.207808			-31.5	2.56288	2.91064	2.94595	3.15528	3.04735	2.92442	0.0999444
		-31.4	3.55576	2.53744	2.94124	3.19035	3.0562	0.214066			-31.4	2.50645	2.9707	2.95742	3.18247	3.04477	2.93236	0.11373
		-31.3	3.48794	2.46263	3.02533	3.19861	3.04363	0.215895			-31.3	2.55603	2.88689	2.9689	3.11112	3.16363	2.93732	0.107319
		-31.2	3.54402	2.46521	2.9438	3.12426	3.01932	0.223432			-31.2	2.47567	2.95077	2.93446	3.11451	3.05511	2.9061	0.112629
		-31.1	3.51794	2.52196	3.00241	3.20275	3.06126	0.208743			-31.1	2.50815	2.93523	2.99186	3.13149	3.10936	2.93522	0.112793
		-31	3.48403	2.54518	2.97438	3.211	3.05365	0.198917			-31	2.54578	2.94409	2.95456	3.08733	3.08096	2.92254	0.0989171
		-30.9	3.49837	2.51164	3.06355	3.17177	3.06133	0.205216			-30.9	2.53894	2.91378	2.94881	3.17567	3.10163	2.93577	0.110271
		-30.8	3.51794	2.44973	2.90304	3.1821	3.0132	0.226003			-30.8	2.54919	2.94424	2.89716	3.15867	3.12229	2.93431	0.108506
		-30.7	3.50228	2.46005	3.02788	3.15732	3.03688	0.216779			-30.7	2.53723	2.94958	2.97178	3.19264	3.05252	2.94075	0.109502
		-30.6	3.57924	2.56324	2.99475	3.20894	3.08654	0.212132			-30.6	2.52525	2.9036	2.96603	3.15188	3.11712	2.93278	0.111808
		-30.5	3.46447	2.43167	3.03298	3.15112	3.02006	0.216226			-30.5	2.53894	2.94715	2.90003	3.02958	3.10937	2.90501	0.0982582
		-30.4	3.52185	2.53487	3.01515	3.19654	3.0671	0.206058			-30.4	2.51158	2.92835	3.00909	3.1281	3.11196	2.93782	0.112558
		-30.3	3.47099	2.54001	3.03044	3.16352	3.05124	0.193773			-30.3	2.50986	2.94604	2.97465	3.13149	3.03444	2.9193	0.107168
		-30.2	3.53751	2.52969	2.95145	3.18622	3.05122	0.211473			-30.2	2.46199	2.93884	2.9316	3.19264	3.13263	2.93154	0.128285
		-30.1	3.50229	2.53229	3.02788	3.20687	3.06733	0.203406			-30.1	2.54749	2.95319	2.92873	3.09073	3.08354	2.92073	0.0989531
		-30	3.49837	2.55034	3.00241	3.11394	3.04126	0.195096			-30	2.55603	2.91038	2.94594	3.15188	3.10679	2.93421	0.105092
		-29.9	3.50098	2.56839	3.08139	3.16144	3.07805	0.192697			-29.9	2.49447	2.93895	2.93448	3.18586	3.07062	2.92488	0.117237
		-29.8	3.50489	2.52712	3.01514	3.14905	3.04905	0.202351			-29.8	2.4654	2.98651	2.99473	3.13151	3.16363	2.94836	0.125845
		-29.7	3.45663	2.52712	3.0559	3.1821	3.05544	0.194962			-29.7	2.56459	2.96887	2.96602	3.09074	3.18172	2.95439	0.105488
		-29.6	3.5062	2.5039	3.02533	3.16764	3.05077	0.208325			-29.6	2.53552	2.90887	2.96604	3.18247	3.15847	2.95027	0.116458
		-29.5	3.49706	2.5426	2.95655	3.16352	3.03993	0.199695			-29.5	2.43805	2.96531	2.98898	3.09073	3.1352	2.92365	0.125395
		-29.4	3.52967	2.48327	3.02788	3.19448	3.05883	0.218388			-29.4	2.51328	2.91744	2.96029	3.17566	3.11713	2.93676	0.116162
		-29.3	3.51142	2.51164	3.04062	3.14699	3.05267	0.206601			-29.3	2.62785	2.95319	3.05213	3.15189	3.13781	2.98457	0.0959876
		-29.2	3.49315	2.52454	2.96418	3.13667	3.02964	0.201186			-29.2	2.49449	2.90009	2.97752	3.14508	3.16105	2.93565	0.120894
		-29.1	3.49837	2.5426	3.03044	3.13047	3.05047	0.196924			-29.1	2.515	2.96539	2.93161	3.14508	3.06803	2.92502	0.109241
		-29	3.47751	2.51421	3.04571	3.12221	3.03991	0.198885			-29	2.5321	2.97417	2.88281	3.16887	3.08096	2.92778	0.110075
		-28.9	3.45924	2.48584	2.98456	3.14906	3.01968	0.203342			-28.9	2.43805	2.93886	3.00046	3.10772	3.07062	2.91114	0.121787
		-28.8	3.45012	2.55549	2.98456	3.11808	3.02706	0.185168			-28.8	2.55775	2.99174	2.93734	3.22662	3.11971	2.96663	0.113952
		-28.7	3.53751	2.46778	2.96927	3.13254	3.02678	0.221325			-28.7	2.55775	2.9797	2.98039	3.11791	3.08871	2.94489	0.10074
		-28.6	3.55446	2.51164	2.97692	3.10775	3.0377	0.21455			-28.6	2.515	2.912	2.97751	3.12471	3.07838	2.92152	0.108252
		-28.5	3.48404	2.45489	2.97692	3.10362	3.00487	0.212644			-28.5	2.48763	2.94607	2.96315	3.17906	3.0422	2.92362	0.116505
		-28.4	3.55576	2.56582	2.92342	3.08504	3.03251	0.205397			-28.4	2.54235	2.96513	2.9115	3.05676	3.12747	2.92064	0.101605
		-28.3	3.45925	2.42909	3.02533	3.09743	3.00277	0.213493			-28.3	2.56971	2.94101	2.94594	3.20964	3.1042	2.9541	0.108587
		-28.2	3.52838	2.47294	2.95399	3.15525	3.02764	0.219874			-28.2	2.46369	2.96022	2.9976	3.11792	3.16364	2.94061	0.124954
		-28.1	3.53882	2.48584	2.98967	3.16144	3.04394	0.218542			-28.1	2.47737	2.92112	2.99761	3.18247	3.11714	2.93914	0.12407
		-28	3.45142	2.43166	2.97183	3.06024	2.97879	0.210043			-28	2.53894	2.96541	2.91726	3.21983	3.12747	2.95378	0.117157
		-27.9	3.46056	2.43166	2.97691	3.09744	2.99164	0.213086			-27.9	2.47567	2.94238	3.04926	3.1179	3.08613	2.93427	0.118402
		-27.8	3.46316	2.5039	3.00494	3.11807	3.02252	0.198447			-27.8	2.515	2.99004	2.91726	3.12472	3.10937	2.93128	0.110921
		-27.7	3.47099	2.50906	2.9591	3.1408	3.01999	0.200573			-27.7	2.48764	2.90869	3.01194	3.1179	3.13521	2.93227	0.118372
		-27.6	3.52055	2.442	3.00241	3.16765	3.03315	0.224731			-27.6	2.51671	2.97059	2.9603	3.14849	3.10937	2.94109	0.112399
		-27.5	3.45794	2.48842	2.94125	3.12222	3.00246	0.202031			-27.5	2.4962	2.90865	2.92873	3.09071	3.06545	2.89795	0.106696
		-27.4	3.48534	2.48326	2.98456	3.08297	3.00903	0.206028			-27.4	2.52868	2.87834	2.97751	3.22661	3.14037	2.9503	0.121687
		-27.3	3.51141	2.44457	2.95909	3.14904	3.01603	0.22228			-27.3	2.5663	2.92676	2.96316	3.15528	3.08354	2.93901	0.101811
		-27.2	3.52316	2.46263	3.0763	3.13667	3.04969	0.219296			-27.2	2.54236	2.91216	2.96892	3.14849	3.16105	2.94659	0.112214
		-27.1	3.55968	2.491	2.82914	3.1222	3.0005	0.22665			-27.1	2.54406	2.88765	2.92586	3.18586	3.11713	2.93211	0.112076
		-27	3.54012	2.46005	3.03808	3.14904	3.04682	0.223265			-27	2.48079	2.97969	2.9804	3.13829	3.11971	2.93977	0.119519
		-26.9	3.45403	2.50132	2.92343	3.15525	3.00851	0.200935			-26.9	2.47225	2.92135	2.98899	3.1281	3.06288	2.91471	0.115936
		-26.8	3.46447	2.47036	2.97438	3.15317	3.0156	0.208044			-26.8	2.48764	2.95667	3.03203	3.16208	3.1223	2.95214	0.121489
		-26.7	3.47229	2.53745	3.02788	3.15732	3.04874	0.194303			-26.7	2.51158	2.96011	2.98326	3.10772	3.06027	2.92459	0.106591
		-26.6	3.5075	2.51422	2.96672	3.18003	3.04212	0.20816			-26.6	2.56117	2.92275	2.99472	3.20624	3.11194	2.95937	0.110764
		-26.5	3.49707	2.50906	2.94381	3.13873	3.02217	0.205861			-26.5	2.50303	2.89819	2.99472	3.20283	3.06804	2.93336	0.11852
		-26.4	3.53098	2.45488	2.97691	3.14079	3.02589	0.223003			-26.4	2.52354	2.97074	2.94881	3.18585	3.17914	2.96161	0.120365
		-26.3	3.48924	2.52196	2.99476	3.21719	3.05579	0.20466			-26.3	2.51158	2.94413	3.04351	3.15866	3.10162	2.9519	0.115651
		-26.2	3.49055	2.47036	3.03043	3.17177	3.04078	0.213099			-26.2	2.52355	2.8683	3.03778	3.19605	3.07838	2.94081	0.116799
		-26.1	3.54794	2.4781	2.99476	3.19035	3.05279	0.223183			-26.1	2.44146	2.95664	2.97752	3.11452	3.07061	2.91215	0.121216
		-26	3.45664	2.58129	3.00241	3.15319	3.04838	0.182104			-26	2.5355	2.94793	2.95168	3.1179	3.09645	2.92989	0.104745
		-25.9	3.55053	2.48842	3.00241	3.19448	3.05896	0.221494			-25.9	2.49106	2.9869	2.95168	2.9956	3.13262	2.91157	0.109554
		-25.8	3.49707	2.54518	2.99731	3.09744	3.03425	0.195523			-25.8	2.47909	2.90725	3.00621	3.21642	3.05252	2.9323	0.123828
		-25.7	3.51794	2.46262	2.98202	3.14906	3.02791	0.219177			-25.7	2.56972	2.97233	2.99473	3.14508	3.07061	2.9505	0.0999294
		-25.6	3.48926	2.48069	2.97691	3.20068	3.03688	0.212999			-25.6	2.51158	2.95141	2.97751	3.08733	3.08871	2.92331	0.106657
		-25.5	3.51794	2.49615	2.96928	3.1883	3.04292	0.214313			-25.5	2.52012	2.94402	3.02918	3.08394	3.13264	2.94198	0.110016
		-25.4	3.48795	2.52454	2.99222	3.13873	3.03586	0.199649			-25.4	2.54064	2.95111	2.9689	3.19605	3.04477	2.9403	0.108853
		-25.3	3.56881	2.48326	2.95909	3.19242	3.05089	0.227101			-25.3	2.51329	2.93707	3.02342	3.15866	3.12487	2.95146	0.116272
		-25.2	3.5049	2.5529	3.03297	3.14286	3.05841	0.196356			-25.2	2.54064	2.95491	2.91151	3.04657	3.06546	2.90382	0.0951509
		-25.1	3.5049	2.44973	2.99222	3.21514	3.0405	0.223142			-25.1	2.50474	2.88023	3.03778	3.01599	3.04478	2.89671	0.102462
		-25	3.5075	2.53744	3.0126	3.15939	3.05423	0.201106			-25	2.61075	2.90903	2.95741	3.11453	3.08095	2.93453	0.0893994
		-24.9	3.49707	2.47553	2.96928	3.16145	3.02583	0.213404			-24.9	2.48592	2.90855	2.93159	3.14849	3.08096	2.9111	0.115413
		-24.8	3.57142	2.48326	2.96418	3.1697	3.04714	0.226335			-24.8	2.55091	2.9143	3.01481	3.06695	3.13263	2.93592	0.102661
		-24.7	3.51925	2.49617	2.93361	3.17797	3.03175	0.215157			-24.7	2.54406	2.91924	3.01195	3.11452	3.04736	2.92743	0.100888
		-24.6	3.52185	2.50132	3.03551	3.12635	3.04626	0.210093			-24.6	2.53209	2.90714	2.96031	3.14849	3.08354	2.92631	0.107474
		-24.5	3.5362	2.5297	2.90813	3.20894	3.04574	0.214557			-24.5	2.55433	2.95098	2.99474	3.10092	3.08354	2.9369	0.0995779
		-24.4	3.50881	2.47295	3.01769	3.15731	3.03919	0.215172			-24.4	2.49276	2.91212	3.00333	3.09753	3.01379	2.90391	0.106901
		-24.3	3.5062	2.51423	2.93362	3.14906	3.02578	0.207401			-24.3	2.50815	2.90544	2.96604	3.07713	3.12746	2.91684	0.109461
		-24.2	3.49707	2.49874	3.05336	3.15732	3.05162	0.20722			-24.2	2.53039	2.93707	2.93734	3.15529	3.14297	2.94061	0.112993
		-24.1	3.52446	2.51422	2.95399	3.17177	3.04111	0.211326			-24.1	2.54919	2.88212	3.00333	3.08733	3.06028	2.91645	0.0983597
		-24	3.49185	2.49617	2.96928	3.16352	3.0302	0.208125			-24	2.5167	2.9388	2.99186	3.08054	3.06803	2.91918	0.103887
		-23.9	3.52837	2.45747	2.97184	3.14492	3.02565	0.222239			-23.9	2.48592	2.9494	2.94308	3.09073	3.08096	2.91002	0.110539
		-23.8	3.53359	2.5039	2.96673	3.13461	3.03471	0.213159			-23.8	2.52526	2.91729	2.99473	3.17566	3.06029	2.93465	0.110766
		-23.7	3.54924	2.48842	2.98457	3.15526	3.04438	0.219819			-23.7	2.49961	2.91256	2.92012	3.12811	3.13005	2.91809	0.114934
		-23.6	3.57533	2.46262	2.94124	3.19449	3.04342	0.233366			-23.6	2.52696	2.87326	2.94882	3.09753	3.04994	2.8993	0.100935
		-23.5	3.5075	2.52455	2.98456	3.11395	3.03264	0.202603			-23.5	2.56117	2.95284	2.96317	3.09073	3.11197	2.93597	0.0991025
		-23.4	3.47751	2.55034	2.99986	3.15112	3.04471	0.192583			-23.4	2.48763	2.91576	3.01769	3.13489	3.19206	2.94961	0.124963
		-23.3	3.54663	2.46778	3.00495	3.12014	3.03488	0.222047			-23.3	2.44831	2.87521	2.99473	3.15528	3.08096	2.9109	0.124687
		-23.2	3.48273	2.40587	3.04318	3.21101	3.03569	0.228639			-23.2	2.53895	2.94741	2.94019	3.1281	3.16363	2.94366	0.110956
		-23.1	3.48142	2.52454	2.96928	3.07058	3.01146	0.196475			-23.1	2.55775	2.91397	2.96029	3.15526	3.0913	2.93571	0.104006
		-23	3.54664	2.42393	2.94891	3.12841	3.01197	0.232594			-23	2.49447	2.93877	2.97177	3.09074	3.07319	2.91379	0.10875
		-22.9	3.55185	2.46263	3.05081	3.12428	3.04739	0.224044			-22.9	2.55945	2.92102	2.97465	3.09753	3.0732	2.92517	0.0969118
		-22.8	3.56359	2.53229	2.96674	3.2172	3.06995	0.217004			-22.8	2.53551	2.91931	2.89143	3.06015	3.01379	2.88404	0.0923635
		-22.7	3.51272	2.47553	3.03552	3.12428	3.03701	0.213927			-22.7	2.55262	2.90868	2.95741	3.18586	3.12488	2.94589	0.110861
		-22.6	3.58054	2.43683	2.96418	3.16559	3.03678	0.237605			-22.6	2.49789	2.93171	2.90004	3.05336	3.05511	2.88762	0.102351
		-22.5	3.62619	2.48326	2.90813	3.1284	3.03649	0.237825			-22.5	2.54406	2.93689	2.90577	3.1349	3.12488	2.9293	0.107131
		-22.4	3.49186	2.42649	2.97182	3.1883	3.01962	0.224637			-22.4	2.50644	2.89451	2.95456	3.12472	3.05511	2.90707	0.10775
		-22.3	3.46707	2.47295	3.02788	3.21927	3.04679	0.211352			-22.3	2.54235	2.90525	2.96029	3.1417	3.17138	2.94419	0.112668
		-22.2	3.51924	2.46779	2.9489	3.13666	3.01815	0.218485			-22.2	2.52183	2.92969	2.91152	3.11453	3.05253	2.90602	0.103231
		-22.1	3.46186	2.54777	2.99731	3.20481	3.05294	0.193342			-22.1	2.57143	2.94401	2.89717	3.06355	3.14038	2.92331	0.0979075
		-22	3.50621	2.48326	3.01259	3.15112	3.0383	0.21221			-22	2.49448	2.94611	2.94594	3.1315	3.06286	2.91618	0.111241
		-21.9	3.52577	2.50907	3.01769	3.13668	3.0473	0.209661			-21.9	2.5509	2.94061	2.94594	3.1349	3.14038	2.94255	0.107131
		-21.8	3.5036	2.50648	3.02534	3.15939	3.0487	0.206907			-21.8	2.49106	2.9374	2.90864	3.15187	3.12746	2.92329	0.118569
		-21.7	3.54142	2.53228	2.95908	3.1697	3.05062	0.21058			-21.7	2.52697	2.91044	2.96604	3.17227	3.07578	2.9303	0.110468
		-21.6	3.5023	2.54001	2.96927	3.12015	3.03293	0.198941			-21.6	2.56629	2.94619	2.88281	3.10092	3.24891	2.94902	0.114866
		-21.5	3.51793	2.49874	3.05591	3.22134	3.07348	0.214093			-21.5	2.47054	2.9213	3.00621	3.20283	3.07578	2.93533	0.125006
		-21.4	3.5062	2.51939	3.01514	3.12427	3.04125	0.203324			-21.4	2.50645	2.93545	2.94022	3.15867	3.11196	2.93055	0.115093
		-21.3	3.53099	2.48584	2.96674	3.18623	3.04245	0.218878			-21.3	2.53551	2.97253	2.92585	3.12131	3.06027	2.92309	0.10266
		-21.2	3.44229	2.48069	2.9871	3.15526	3.01633	0.201766			-21.2	2.55432	2.92619	2.92012	3.10091	3.08613	2.91754	0.0985036
		-21.1	3.54272	2.49358	2.99221	3.16144	3.04749	0.217582			-21.1	2.52012	2.92131	2.97752	3.14508	3.05512	2.92383	0.107716
		-21	3.49055	2.48326	3.05591	3.15524	3.04624	0.20943			-21	2.50473	2.96001	2.92873	3.10092	3.11196	2.92127	0.110385
		-20.9	3.46576	2.53486	3.02024	3.18622	3.05177	0.19529			-20.9	2.56457	2.92482	2.92011	3.14508	3.04219	2.91936	0.0979651
		-20.8	3.5975	2.49358	2.98967	3.16557	3.06158	0.228367			-20.8	2.5321	2.91592	2.92585	3.19944	3.10421	2.9355	0.11431
		-20.7	3.46186	2.50648	2.93106	3.11395	3.00334	0.198865			-20.7	2.45173	2.94061	2.92585	3.1213	3.08097	2.90409	0.119353
		-20.6	3.4423	2.53228	3.02533	3.16557	3.04137	0.190527			-20.6	2.53893	2.94103	2.92871	3.10092	3.07838	2.91759	0.100876
		-20.5	3.49054	2.52453	2.954	3.19036	3.03986	0.203859			-20.5	2.53552	2.94418	2.9689	3.13149	3.14556	2.94513	0.110284
		-20.4	3.44882	2.5555	3.0075	3.1284	3.03505	0.184988			-20.4	2.46712	2.95816	2.9517	3.09753	3.10938	2.91678	0.117237
		-20.3	3.5375	2.48069	3.02279	3.116	3.03924	0.217257			-20.3	2.54235	2.93032	2.98326	3.20962	3.10938	2.95498	0.114095
		-20.2	3.50098	2.52712	2.96674	3.13254	3.03184	0.201911			-20.2	2.4637	2.9549	2.9402	3.1213	3.11453	2.91893	0.12004
		-20.1	3.51271	2.46779	2.92087	3.18003	3.02035	0.220443			-20.1	2.56116	2.92627	2.92586	3.12811	3.08871	2.92602	0.100107
		-20	3.51925	2.49358	3.05591	3.21927	3.072	0.215358			-20	2.48763	2.96361	2.98325	3.11792	3.04219	2.91892	0.111118
		-19.9	3.37708	2.55293	3.03043	3.10568	3.01653	0.171529			-19.9	2.52525	2.91775	2.9689	3.24361	3.05252	2.94161	0.117935
		-19.8	3.52837	2.46264	3.01259	3.20481	3.0521	0.223455			-19.8	2.51842	2.9882	2.97753	3.14509	3.08096	2.94204	0.110313
		-19.7	3.47228	2.42393	2.93107	3.14493	2.99305	0.219939			-19.7	2.47225	2.96196	2.89717	3.15867	3.07321	2.91265	0.118939
		-19.6	3.52707	2.56324	3.03298	3.15319	3.06912	0.198746			-19.6	2.57826	2.97779	3.01482	3.07035	3.10162	2.94857	0.0950335
		-19.5	3.4723	2.47553	2.97693	3.18829	3.02826	0.210343			-19.5	2.56458	2.98158	2.97751	3.16207	3.13007	2.96316	0.106496
		-19.4	3.58576	2.49358	2.95654	3.13459	3.04262	0.225889			-19.4	2.48763	2.9511	2.92872	3.15527	3.09387	2.92332	0.116944
		-19.3	3.5049	2.4652	2.89284	3.15318	3.00403	0.219053			-19.3	2.53723	2.9424	2.95743	3.09074	3.16623	2.93881	0.108727
		-19.2	3.50619	2.49359	2.96928	3.13459	3.02591	0.209971			-19.2	2.47223	2.93358	2.95168	3.07375	3.08613	2.90347	0.11215
		-19.1	3.50881	2.42134	3.00496	3.14286	3.01949	0.225952			-19.1	2.51158	2.98647	2.9689	3.18245	3.08096	2.94607	0.115111
		-19	3.43448	2.46004	3.05081	3.12427	3.0174	0.203539			-19	2.50131	2.92981	2.94595	3.1417	3.1197	2.92769	0.115066
		-18.9	3.46316	2.46779	2.92597	3.15319	3.00253	0.209501			-18.9	2.50815	2.92459	2.96604	3.1451	3.09904	2.92859	0.11272
		-18.8	3.52055	2.5297	2.94126	3.09329	3.0212	0.204636			-18.8	2.52012	2.92293	3.01195	3.09754	3.1533	2.94117	0.112267
		-18.7	3.47099	2.45747	2.99731	3.12427	3.01251	0.210356			-18.7	2.48763	3.0036	2.99186	3.12472	3.12747	2.94705	0.118404
		-18.6	3.52316	2.58646	2.94125	3.11188	3.04069	0.194521			-18.6	2.58168	2.90746	2.98326	3.1349	3.08354	2.93817	0.0974414
		-18.5	3.45533	2.43166	2.99731	3.15526	3.00989	0.214875			-18.5	2.49276	2.94248	2.9316	3.11111	3.06804	2.9092	0.10978
		-18.4	3.51142	2.53745	2.97183	3.17383	3.04863	0.203522			-18.4	2.50473	2.92818	2.98038	3.15527	3.11454	2.93662	0.115753
		-18.3	3.54924	2.49358	2.89538	3.13873	3.01923	0.22114			-18.3	2.49448	2.96007	3.01768	3.17227	3.20757	2.97041	0.12764
		-18.2	3.5075	2.46779	2.97948	3.21308	3.04196	0.21977			-18.2	2.55774	2.94089	2.96891	3.10433	3.08095	2.93056	0.0983329
		-18.1	3.47229	2.45231	2.99223	3.14906	3.01647	0.212959			-18.1	2.47738	2.92645	2.92873	3.1315	3.06804	2.90642	0.114401
		-18	3.49185	2.53228	2.99731	3.13873	3.04004	0.198646			-18	2.5338	2.9777	2.90863	3.11451	3.11713	2.93035	0.10695
		-17.9	3.57142	2.46779	2.93616	3.19654	3.04298	0.231856			-17.9	2.50303	2.92282	2.95168	3.20284	3.12489	2.94105	0.121375
		-17.8	3.5023	2.52712	3.02789	3.13666	3.04849	0.201238			-17.8	2.53381	2.96744	2.98039	3.16208	3.09388	2.94752	0.109566
		-17.7	3.5662	2.48069	2.96929	3.13253	3.03718	0.224211			-17.7	2.49961	2.95665	3.00908	3.247	3.14038	2.97054	0.128204
		-17.6	3.48795	2.54001	3.0075	3.17795	3.05335	0.197911			-17.6	2.48593	2.92987	2.95741	3.17906	3.09387	2.92923	0.119756
		-17.5	3.52707	2.4678	2.96672	3.1759	3.03437	0.221427			-17.5	2.4637	2.96362	2.97464	3.1519	3.1533	2.94143	0.126294
		-17.4	3.46316	2.51423	2.94634	3.08917	3.00322	0.196062			-17.4	2.51157	2.94803	2.98612	3.14169	3.05511	2.9285	0.109319
		-17.3	3.54663	2.44973	2.9438	3.16557	3.02643	0.229017			-17.3	2.56116	2.87695	2.94594	3.18586	3.14555	2.94309	0.111844
		-17.2	3.50751	2.44971	3.04062	3.15732	3.03879	0.219992			-17.2	2.47567	3.00089	2.9603	3.13489	3.07578	2.92951	0.117387
		-17.1	3.51142	2.46777	2.90305	3.1759	3.01454	0.220665			-17.1	2.53038	2.92144	3.06359	3.12469	3.09129	2.94628	0.109593
		-17	3.51924	2.5555	2.9489	3.15937	3.04576	0.201417			-17	2.53039	2.91934	2.93735	3.16548	3.06544	2.9236	0.108038
		-16.9	3.51143	2.40071	3.03808	3.2234	3.0434	0.235325			-16.9	2.53209	2.98853	3.02055	3.16547	3.11971	2.96527	0.112954
		-16.8	3.49968	2.50131	2.97437	3.1697	3.03627	0.208679			-16.8	2.48934	2.9724	3.00047	3.16207	3.07577	2.94001	0.117378
		-16.7	3.51532	2.45489	2.96163	3.16764	3.02487	0.221698			-16.7	2.52867	2.88252	2.99473	3.10432	3.06028	2.9141	0.103345
		-16.6	3.48273	2.5168	3.01005	3.14493	3.03863	0.200342			-16.6	2.52696	2.94786	2.92585	3.09752	3.17396	2.93443	0.111863
		-16.5	3.48272	2.52712	2.99987	3.1821	3.04795	0.200124			-16.5	2.48079	2.93891	3.02344	3.07375	3.06287	2.91595	0.11134
		-16.4	3.57141	2.46004	3.02024	3.1759	3.0569	0.230301			-16.4	2.5492	2.9443	2.9316	3.20624	3.14296	2.95486	0.114843
		-16.3	3.49185	2.50648	2.97183	3.18003	3.03755	0.206769			-16.3	2.4962	2.88052	2.98899	3.09413	3.16105	2.92418	0.117104
		-16.2	3.45013	2.5555	2.98456	3.16971	3.03997	0.187715			-16.2	2.53893	2.96525	3.05786	3.1213	3.00861	2.93839	0.103187
		-16.1	3.53098	2.5039	3.01514	3.17177	3.05545	0.21321			-16.1	2.54576	2.91051	3.00046	3.13489	3.16105	2.95054	0.11096
		-16	3.49577	2.5039	2.95145	3.13254	3.02091	0.206171			-16	2.55603	2.94775	3.03204	3.09753	3.03444	2.93356	0.0973367
		-15.9	3.51532	2.50132	2.93616	3.12015	3.01824	0.21044			-15.9	2.50303	2.91944	2.9689	3.09073	3.11454	2.91933	0.110284
		-15.8	3.48924	2.46263	3.01004	3.13047	3.02309	0.212743			-15.8	2.53723	2.96061	2.95456	3.09074	3.06545	2.92172	0.0999123
		-15.7	3.48533	2.51163	2.96418	3.21926	3.0451	0.207218			-15.7	2.43463	2.85398	2.98612	3.10094	3.12745	2.90062	0.126137
		-15.6	3.52837	2.46004	2.90559	3.12014	3.00354	0.222491			-15.6	2.6381	2.90735	2.97465	3.14849	3.06803	2.94732	0.0874634
		-15.5	3.53621	2.51681	3.0126	3.13873	3.05109	0.210149			-15.5	2.47737	2.92287	3.01769	3.05336	3.11711	2.91768	0.114473
		-15.4	3.50229	2.491	2.92851	3.17798	3.02494	0.213243			-15.4	2.55603	2.91592	2.94883	3.06015	3.11713	2.91961	0.0979337
		-15.3	3.50881	2.46004	2.9591	3.15526	3.0208	0.218803			-15.3	2.50815	2.9369	3.01195	3.21303	3.14814	2.96364	0.123846
		-15.2	3.53099	2.50907	2.92597	3.16146	3.03187	0.214175			-15.2	2.57655	2.94604	3.06648	3.15527	3.12489	2.97384	0.105577
		-15.1	3.58577	2.48585	2.93107	3.11189	3.02864	0.227572			-15.1	2.52868	2.90703	2.92299	3.14508	3.15071	2.9309	0.11327
		-15	3.48795	2.49874	2.95654	3.20894	3.03804	0.209981			-15	2.56457	2.93341	3.00047	3.09413	3.06803	2.93212	0.0960426
		-14.9	3.48664	2.54776	2.98203	3.15526	3.04292	0.195448			-14.9	2.47395	2.89649	2.96318	3.11791	3.15847	2.922	0.121942
		-14.8	3.57141	2.49874	2.92596	3.18416	3.04507	0.225285			-14.8	2.61418	2.92054	2.95168	3.07713	3.11971	2.93665	0.0888027
		-14.7	3.45534	2.5168	3.0075	3.16144	3.03527	0.196207			-14.7	2.50987	2.99199	2.97178	3.15869	3.08871	2.94421	0.113705
		-14.6	3.52446	2.50906	2.97947	3.14906	3.04051	0.210586			-14.6	2.52525	2.88548	2.97751	3.13149	3.13263	2.93047	0.11174
		-14.5	3.56098	2.45489	2.95399	3.13666	3.02663	0.229093			-14.5	2.60563	2.92309	2.9976	3.15528	3.09387	2.9551	0.0959921
		-14.4	3.48012	2.45747	2.96164	3.1821	3.02033	0.215607			-14.4	2.50644	2.96206	3.00048	3.10433	3.10162	2.93499	0.110706
		-14.3	3.58054	2.55292	2.95399	3.1883	3.06894	0.21515			-14.3	2.54235	2.89267	2.9316	3.20963	3.06286	2.92782	0.11124
		-14.2	3.51402	2.51164	2.98967	3.15524	3.04264	0.208095			-14.2	2.53381	2.9298	3.00621	3.07376	3.08095	2.92491	0.101513
		-14.1	3.52055	2.49359	2.98457	3.15526	3.03849	0.213275			-14.1	2.49789	2.95299	2.98614	3.04657	3.06544	2.9098	0.104951
		-14	3.49708	2.50391	2.99221	3.15526	3.03711	0.20653			-14	2.49448	2.98123	2.99472	3.11451	3.10421	2.93783	0.114144
		-13.9	3.52446	2.48068	2.99221	3.19036	3.04693	0.218374			-13.9	2.59707	2.87876	2.94882	3.16547	3.12488	2.943	0.101588
		-13.8	3.46577	2.50906	2.9973	3.21307	3.0463	0.20306			-13.8	2.56972	2.94391	2.98325	3.10432	3.04735	2.92971	0.094071
		-13.7	3.52968	2.40588	2.92852	3.10569	2.99244	0.232665			-13.7	2.54235	2.94399	2.94595	3.1315	3.11971	2.9367	0.106558
		-13.6	3.5049	2.46779	3.00494	3.15111	3.03219	0.215424			-13.6	2.54919	2.93346	3.03492	3.15867	3.0732	2.94989	0.106502
		-13.5	3.53751	2.52712	2.93106	3.19449	3.04755	0.21332			-13.5	2.57998	2.89824	2.91151	3.08054	3.13779	2.92161	0.0973014
		-13.4	3.52055	2.50132	2.96674	3.17177	3.0401	0.212884			-13.4	2.57996	2.87334	2.90291	3.13829	3.06545	2.91199	0.0965862
		-13.3	3.49316	2.42393	3.02535	3.10982	3.01306	0.221188			-13.3	2.52526	2.94736	2.99761	3.12469	3.11712	2.94241	0.109736
		-13.2	3.58314	2.51163	2.96929	3.16351	3.05689	0.222353			-13.2	2.46882	2.92655	2.93735	3.15528	3.04995	2.90759	0.117341
		-13.1	3.46708	2.53229	2.93107	3.13048	3.01523	0.195313			-13.1	2.55432	2.9672	3.00335	3.10772	3.16364	2.95924	0.107191
		-13	3.5362	2.40588	3.04063	3.18416	3.04172	0.236131			-13	2.50131	2.92485	2.9316	3.18585	3.04994	2.91871	0.114676
		-12.9	3.46577	2.46779	2.96674	3.14905	3.01234	0.208747			-12.9	2.50987	2.95472	2.97464	3.10094	3.06026	2.92008	0.106021
		-12.8	3.51142	2.50907	2.96164	3.19242	3.04364	0.210841			-12.8	2.52697	2.86638	2.92586	3.15189	3.07062	2.90835	0.107972
		-12.7	3.48012	2.53745	2.98456	3.17177	3.04347	0.1972			-12.7	2.47566	2.91425	2.97465	3.13489	3.06544	2.91298	0.11566
		-12.6	3.51533	2.52454	3.01259	3.1883	3.06019	0.206711			-12.6	2.45173	2.91232	2.97176	3.25041	3.13262	2.94377	0.136669
		-12.5	3.51794	2.51938	2.92341	3.16558	3.03158	0.209871			-12.5	2.48764	2.93009	2.92585	3.11451	3.09129	2.90988	0.112636
		-12.4	3.49707	2.56066	3.0075	3.16352	3.05719	0.194468			-12.4	2.54749	2.94253	2.98898	3.10771	3.10678	2.9387	0.103056
		-12.3	3.49838	2.46004	2.95654	3.19861	3.02839	0.219478			-12.3	2.53552	2.8909	2.96604	3.11111	3.09905	2.92052	0.104731
		-12.2	3.48403	2.50391	3.01769	3.16765	3.04332	0.20439			-12.2	2.54578	2.90698	2.99187	3.16887	3.07838	2.93837	0.107403
		-12.1	3.51142	2.49874	2.97692	3.16971	3.0392	0.211343			-12.1	2.52525	2.93542	2.90863	3.15189	3.10162	2.92456	0.110192
		-12	3.55184	2.51937	3.01004	3.17383	3.06377	0.214007			-12	2.55089	2.98849	2.87996	3.12469	3.06029	2.92086	0.101022
		-11.9	3.47099	2.52969	2.92597	3.10364	3.00757	0.195579			-11.9	2.50645	2.90363	2.96604	3.16208	3.1042	2.92848	0.115234
		-11.8	3.4762	2.47037	3.08394	3.23579	3.06658	0.214512			-11.8	2.53381	2.98279	3.00907	3.11791	3.1378	2.95628	0.109783
		-11.7	3.48664	2.57613	3.00494	3.16764	3.05884	0.189464			-11.7	2.48935	2.9178	2.91437	3.15528	3.08871	2.9131	0.11599
		-11.6	3.49446	2.51423	3.01005	3.18622	3.05124	0.20509			-11.6	2.52697	2.93875	2.98038	3.16547	3.1042	2.94315	0.111799
		-11.5	3.46837	2.54776	2.98712	3.14288	3.03653	0.191297			-11.5	2.4312	2.95114	2.9402	3.17906	3.08871	2.91806	0.129589
		-11.4	3.46447	2.53486	2.95909	3.16764	3.03151	0.195339			-11.4	2.53381	2.95484	2.97177	3.14509	3.14297	2.9497	0.111583
		-11.3	3.60141	2.52196	3.00241	3.14906	3.06871	0.222403			-11.3	2.55262	2.91733	2.92873	3.16208	3.08613	2.92938	0.105074
		-11.2	3.46187	2.55291	3.04063	3.19656	3.06299	0.190968			-11.2	2.48593	2.9036	2.98038	3.1383	3.10163	2.92197	0.116824
		-11.1	3.50229	2.48842	2.97693	3.19036	3.0395	0.21302			-11.1	2.45172	2.95837	2.99472	3.1315	3.07321	2.9219	0.121352
		-11	3.49968	2.47553	2.99476	3.07266	3.01066	0.210078			-11	2.5167	3.01173	2.96603	3.16546	3.07321	2.94663	0.112552
		-10.9	3.48664	2.54261	3.00241	3.16145	3.04828	0.196379			-10.9	2.4996	2.91051	2.90004	3.1179	3.07321	2.90025	0.109067
		-10.8	3.50099	2.51423	2.97947	3.14492	3.0349	0.20484			-10.8	2.48422	2.92306	2.96604	3.16208	3.15072	2.93722	0.12296
		-10.7	3.51273	2.48842	2.95399	3.16559	3.03018	0.214183			-10.7	2.515	3.01477	2.93734	3.17567	3.09904	2.94836	0.115479
		-10.6	3.48403	2.48585	2.97692	3.12842	3.01881	0.207012			-10.6	2.52868	2.94214	2.95743	3.14508	3.12488	2.93964	0.110845
		-10.5	3.42924	2.50907	2.98456	3.11188	3.00869	0.190988			-10.5	2.46369	2.97951	2.99187	3.15188	3.07062	2.93151	0.120978
		-10.4	3.51924	2.48842	3.00494	3.18623	3.04971	0.215282			-10.4	2.51328	2.95136	2.93734	3.09413	3.09129	2.91748	0.10638
		-10.3	3.58706	2.43941	2.97691	3.13666	3.03501	0.236857			-10.3	2.53038	2.90885	3.0263	3.17566	3.17656	2.96355	0.119358
		-10.2	3.48925	2.51939	2.96929	3.15526	3.0333	0.202272			-10.2	2.48934	2.9847	2.98899	3.09074	3.12228	2.93521	0.114744
		-10.1	3.48924	2.43941	3.02535	3.15938	3.02835	0.219175			-10.1	2.50131	2.91224	2.9804	3.18925	3.09904	2.93645	0.118788
		-10	3.56359	2.47811	2.98456	3.13048	3.03918	0.223816			-10	2.54235	2.9797	2.99761	3.18925	3.0887	2.95952	0.110759
		-9.9	3.51664	2.49616	2.97438	3.12635	3.02838	0.210984			-9.9	2.52355	2.95266	2.94881	3.15867	3.1223	2.9412	0.112853
		-9.8	3.46447	2.55549	2.97437	3.14699	3.03533	0.189428			-9.8	2.50303	2.86115	2.95742	3.15188	3.09646	2.91399	0.114773
		-9.7	3.47489	2.4781	3.01516	3.16766	3.03395	0.208492			-9.7	2.54577	2.9175	2.9976	3.19264	3.12747	2.9562	0.113336
		-9.6	3.51925	2.49358	2.99985	3.13667	3.03734	0.21197			-9.6	2.49105	2.94948	2.92298	3.1383	3.15072	2.9305	0.119418
		-9.5	3.49968	2.46779	2.93361	3.17177	3.01821	0.217087			-9.5	2.53038	2.9318	3.03204	3.09753	3.07579	2.93351	0.104731
		-9.4	3.53098	2.46262	3.03553	3.1119	3.03526	0.21976			-9.4	2.47226	2.88222	2.92586	3.1417	3.08096	2.9006	0.117284
		-9.3	3.4749	2.51938	2.91834	3.18003	3.02316	0.202785			-9.3	2.50815	2.96551	2.95742	3.14169	3.10162	2.93488	0.11272
		-9.2	3.52837	2.51422	3.02024	3.10776	3.04265	0.208147			-9.2	2.60563	2.93711	3.00335	3.07374	3.14813	2.95359	0.0938369
		-9.1	3.50749	2.46778	2.93107	3.16765	3.0185	0.218383			-9.1	2.38675	2.94441	2.88282	3.09752	3.07321	2.87694	0.12885
		-9	3.48925	2.48583	3.02534	3.15112	3.03789	0.208462			-9	2.53552	2.92974	3.00334	3.16208	3.07062	2.94026	0.108191
		-8.9	3.50489	2.47553	2.91068	3.1408	3.00798	0.21555			-8.9	2.43976	2.87026	2.98039	3.12811	3.16364	2.91643	0.130261
		-8.8	3.54142	2.5039	3.03807	3.19861	3.0705	0.216076			-8.8	2.53209	2.91605	3.00621	3.11452	3.08613	2.931	0.105535
		-8.7	3.46447	2.44972	2.91069	3.08504	2.97748	0.210498			-8.7	2.49619	2.92309	2.93735	3.18245	3.09905	2.92763	0.118443
		-8.6	3.5401	2.57872	2.99476	3.21513	3.08218	0.20176			-8.6	2.54578	2.93021	2.97752	3.16888	3.12229	2.94894	0.11003
		-8.5	3.42925	2.47552	2.92852	3.15111	2.9961	0.201499			-8.5	2.50474	2.98491	3.02056	3.16207	3.12229	2.95891	0.118049
		-8.4	3.52707	2.40845	2.99985	3.17384	3.0273	0.233625			-8.4	2.49106	2.89473	2.99473	3.20624	3.0577	2.92889	0.120564
		-8.3	3.51663	2.53743	2.97946	3.14287	3.0441	0.202883			-8.3	2.5663	2.92518	2.95456	3.18585	3.10678	2.94773	0.106781
		-8.2	3.57924	2.50132	2.954	3.22339	3.06449	0.227226			-8.2	2.55774	2.8891	3.0177	3.14509	3.04995	2.93192	0.102121
		-8.1	3.51533	2.51937	2.98966	3.1408	3.04129	0.206091			-8.1	2.52867	2.96542	2.99186	3.14169	3.06287	2.9381	0.106838
		-8	3.51795	2.45231	3.00496	3.19448	3.04242	0.223399			-8	2.46882	2.955	3.0263	3.17566	3.18432	2.96202	0.130859
		-7.9	3.53489	2.54002	3.02024	3.18209	3.06931	0.206567			-7.9	2.45685	2.89276	2.97751	3.11453	3.07837	2.904	0.118363
		-7.8	3.51142	2.50391	2.92596	3.17177	3.02826	0.212024			-7.8	2.48935	2.90364	3.00046	3.15188	3.08095	2.92526	0.116562
		-7.7	3.59228	2.50391	2.9438	3.14906	3.04726	0.22608			-7.7	2.53552	2.95135	2.95742	3.14849	3.12489	2.94353	0.109914
		-7.6	3.54402	2.5168	2.9922	3.19861	3.06291	0.214695			-7.6	2.53552	2.93514	3.04065	3.11451	3.12489	2.95014	0.109059
		-7.5	3.51533	2.43425	2.96165	3.1821	3.02333	0.226954			-7.5	2.52354	2.91762	3.00334	3.19265	3.08871	2.94517	0.11484
		-7.4	3.52838	2.56839	3.00495	3.14905	3.06269	0.198323			-7.4	2.4637	2.92836	3.02056	3.06697	3.01379	2.89867	0.111022
		-7.3	3.49315	2.54777	3.02534	3.22547	3.07293	0.199565			-7.3	2.54749	2.90697	3.04064	3.19264	3.1378	2.96511	0.115128
		-7.2	3.55315	2.49359	2.94636	3.14699	3.03502	0.220227			-7.2	2.56116	2.90527	2.96029	3.05336	3.06545	2.90911	0.091911
		-7.1	3.54924	2.56067	2.97692	3.15525	3.06052	0.205073			-7.1	2.50303	2.96711	2.95743	3.08394	3.14555	2.93141	0.112824
		-7	3.44751	2.45231	2.93361	3.15113	2.99614	0.209646			-7	2.49105	2.86978	2.96316	3.14169	3.0267	2.89848	0.11104
		-6.9	3.61184	2.53228	2.98712	3.15939	3.07266	0.223152			-6.9	2.53552	2.93877	3.02918	3.09753	3.12747	2.94569	0.107555
		-6.8	3.47099	2.49874	2.98202	3.09744	3.0123	0.200478			-6.8	2.45001	2.99209	2.95455	3.20624	3.10421	2.94142	0.130547
		-6.7	3.52315	2.50391	2.97692	3.18829	3.04807	0.213411			-6.7	2.49448	2.90543	2.98324	3.07714	3.16622	2.9253	0.116289
		-6.6	3.5349	2.44972	2.93362	3.1697	3.02199	0.227338			-6.6	2.58168	2.86467	2.98613	3.0194	3.0603	2.90244	0.0865774
		-6.5	3.51011	2.61225	2.96419	3.16557	3.06303	0.187831			-6.5	2.49619	2.93732	2.97178	3.13829	3.0913	2.92697	0.113875
		-6.4	3.5675	2.5168	2.9336	3.15111	3.04226	0.219021			-6.4	2.48592	2.96708	2.95456	3.15867	3.09904	2.93306	0.118322
		-6.3	3.49185	2.51939	2.91068	3.12222	3.01103	0.20317			-6.3	2.60562	2.86996	2.98325	3.08394	3.09129	2.92681	0.0898121
		-6.2	3.46839	2.45489	2.954	3.20894	3.02155	0.21611			-6.2	2.50816	2.90341	2.96603	3.16547	3.14813	2.93824	0.118878
		-6.1	3.56228	2.56581	2.954	3.16352	3.0614	0.207857			-6.1	2.51329	2.96686	2.96316	3.12469	3.1378	2.94116	0.113263
		-6	3.53359	2.44199	3.02532	3.16351	3.0411	0.226699			-6	2.59707	2.89664	3.0263	3.08732	3.09904	2.94127	0.0932512
		-5.9	3.52186	2.46263	3.01261	3.17178	3.04222	0.220537			-5.9	2.5321	2.90172	2.98612	3.1349	3.10421	2.93181	0.108303
		-5.8	3.5062	2.48842	2.96927	3.18003	3.03598	0.213334			-5.8	2.56288	2.91438	2.85984	3.11452	3.13004	2.91633	0.103217
		-5.7	3.46447	2.52196	2.95145	3.18829	3.03154	0.199599			-5.7	2.51842	2.92995	3.0464	3.1383	3.10162	2.94694	0.112773
		-5.6	3.55314	2.46263	2.98968	3.19861	3.05101	0.228013			-5.6	2.55603	2.93715	2.96316	3.13488	3.06805	2.93186	0.100503
		-5.5	3.51272	2.49358	2.96673	3.09743	3.01762	0.2099			-5.5	2.51841	2.91404	2.98039	3.06016	3.05513	2.90562	0.100457
		-5.4	3.5323	2.50133	2.95146	3.17591	3.04025	0.215799			-5.4	2.56459	2.97244	3.05213	3.17567	3.10678	2.97432	0.107709
		-5.3	3.54402	2.49875	2.94126	3.14287	3.03173	0.217379			-5.3	2.53722	2.90332	2.89716	3.16548	3.06287	2.91321	0.106716
		-5.2	3.50229	2.5039	2.99477	3.15525	3.03905	0.207453			-5.2	2.56288	2.95822	2.86847	3.12471	3.12229	2.92731	0.103492
		-5.1	3.51663	2.43167	2.94634	3.15731	3.01299	0.226726			-5.1	2.53552	2.92112	3.01769	3.12469	3.03703	2.92721	0.103127
		-5	3.54011	2.44199	3.0177	3.21926	3.05477	0.230847			-5	2.50987	2.89961	2.98324	3.10432	3.1197	2.92335	0.111
		-4.9	3.50881	2.44199	2.9438	3.11602	3.00265	0.221143			-4.9	2.4996	2.97944	2.91151	3.17905	3.16105	2.94613	0.122911
		-4.8	3.51402	2.43425	2.98456	3.10156	3.0086	0.22259			-4.8	2.53894	2.8817	2.97177	3.08055	3.08613	2.91182	0.100598
		-4.7	3.51794	2.46263	2.98458	3.1821	3.03681	0.220795			-4.7	2.5321	2.93895	2.97464	3.14508	3.03961	2.92607	0.104545
		-4.6	3.56881	2.51423	2.97948	3.17797	3.06012	0.219309			-4.6	2.52013	2.91563	2.93734	3.17905	3.1068	2.93179	0.114351
		-4.5	3.49968	2.45746	3.01005	3.18623	3.03835	0.218504			-4.5	2.5338	2.91225	2.92585	3.10092	3.1378	2.92213	0.107096
		-4.4	3.49839	2.50649	2.92343	3.15525	3.02089	0.208199			-4.4	2.52184	2.92299	2.94594	3.12471	3.16622	2.93634	0.114107
		-4.3	3.55968	2.4652	2.99476	3.15319	3.04321	0.226435			-4.3	2.50303	2.95837	2.98899	3.06016	3.11971	2.92605	0.109418
		-4.2	3.53359	2.52454	3.01768	3.13254	3.05209	0.207726			-4.2	2.50644	2.91416	2.9603	3.1417	3.04994	2.91451	0.109219
		-4.1	3.46969	2.52196	3.0228	3.18623	3.05017	0.1988			-4.1	2.45857	2.92283	2.92873	3.14169	3.09387	2.90914	0.120788
		-4	3.52446	2.47035	2.99221	3.17797	3.04125	0.219946			-4	2.59024	2.89436	2.94883	3.10091	3.15589	2.93805	0.099242
		-3.9	3.51664	2.5168	3.01771	3.17796	3.05728	0.208017			-3.9	2.49448	2.93162	2.91438	3.08054	3.10163	2.90453	0.10927
		-3.8	3.51403	2.52196	2.97438	3.16558	3.04399	0.206778			-3.8	2.50473	3.00459	2.94021	3.13149	3.1197	2.94015	0.114584
		-3.7	3.46578	2.52455	2.95909	3.09124	3.01016	0.194205			-3.7	2.52526	2.92832	2.9402	3.1281	3.12229	2.92883	0.109575
		-3.6	3.42012	2.48585	3.05335	3.19243	3.03794	0.19895			-3.6	2.57485	2.85745	2.97178	3.13489	3.08611	2.92502	0.0998417
		-3.5	3.5075	2.50648	3.03808	3.15111	3.05079	0.20718			-3.5	2.50985	2.93718	2.95456	3.15527	3.14296	2.93996	0.116786
		-3.4	3.53881	2.53229	2.9387	3.12633	3.03403	0.208997			-3.4	2.50131	2.93718	2.93447	3.15866	3.06028	2.91838	0.112346
		-3.3	3.46185	2.56582	2.90559	3.21308	3.03659	0.193818			-3.3	2.51669	2.96528	2.95168	3.13488	3.09905	2.93352	0.110234
		-3.2	3.50621	2.45231	3.02788	3.17796	3.04109	0.220209			-3.2	2.52697	2.89852	2.95168	3.19266	3.09129	2.93223	0.11377
		-3.1	3.4449	2.54776	2.96927	3.147	3.02723	0.187538			-3.1	2.50644	2.97055	2.93448	3.13149	3.0887	2.92633	0.111082
		-3	3.52838	2.52712	3.0024	3.12221	3.04503	0.206081			-3	2.5526	2.95844	2.99473	3.10772	3.00085	2.92287	0.09586
		-2.9	3.46056	2.51163	2.97948	3.13048	3.02054	0.197141			-2.9	2.57827	2.91262	2.89429	3.12811	3.11713	2.92608	0.0998703
		-2.8	3.52054	2.52712	2.98966	3.21101	3.06208	0.208926			-2.8	2.51499	2.93382	2.92872	3.07713	3.13263	2.91746	0.108206
		-2.7	3.48924	2.54777	3.0075	3.18828	3.0582	0.197025			-2.7	2.46028	2.94069	2.98614	3.11451	3.08612	2.91755	0.118648
		-2.6	3.53359	2.46005	3.04318	3.1883	3.05628	0.223778			-2.6	2.50644	2.95469	2.89716	3.08393	3.04218	2.89688	0.102929
		-2.5	3.50359	2.5426	2.94381	3.12015	3.02754	0.199454			-2.5	2.52696	2.92812	3.0177	3.08055	3.18431	2.94753	0.113123
		-2.4	3.45533	2.52712	3.0075	3.15732	3.03682	0.19372			-2.4	2.50645	2.97088	2.89715	3.1417	3.06286	2.91581	0.110365
		-2.3	3.51664	2.5426	3.0024	3.11396	3.0439	0.200294			-2.3	2.48422	2.92131	2.93446	3.1451	3.1869	2.9344	0.124697
		-2.2	3.54663	2.44199	3.05336	3.19242	3.0586	0.230275			-2.2	2.51499	2.99376	2.95742	3.11112	3.08354	2.93217	0.108029
		-2.1	3.5036	2.49358	2.96418	3.14081	3.02554	0.209878			-2.1	2.52011	2.98289	2.98039	3.12472	3.12228	2.94608	0.111116
		-2	3.53491	2.49101	3.07884	3.13048	3.05881	0.214982			-2	2.48764	2.93374	2.98899	3.12471	3.02928	2.91287	0.110788
		-1.9	3.49837	2.48326	2.98966	3.14699	3.02957	0.210873			-1.9	2.47054	2.91048	2.97177	3.15189	3.13264	2.92746	0.123186
		-1.8	3.54532	2.51939	3.03298	3.09536	3.04826	0.210005			-1.8	2.52697	2.98664	3.03203	3.1281	3.13263	2.96127	0.112131
		-1.7	3.42795	2.52196	2.9591	3.19243	3.02536	0.193172			-1.7	2.58511	2.9528	2.97752	3.13151	3.09903	2.94919	0.0972276
		-1.6	3.48533	2.50391	3.0024	3.11396	3.0264	0.202456			-1.6	2.53381	2.91943	3.00909	3.12469	3.05512	2.92843	0.104134
		-1.5	3.49446	2.47294	2.95654	3.17796	3.02548	0.214718			-1.5	2.53381	2.96184	2.96604	3.17227	3.09129	2.94505	0.110193
		-1.4	3.49968	2.49615	3.0024	3.10363	3.02547	0.206498			-1.4	2.48592	2.91897	2.98611	3.15529	3.09646	2.92855	0.118095
		-1.3	3.55316	2.51422	2.94125	3.19862	3.05181	0.218733			-1.3	2.49619	2.94083	2.9316	3.12131	3.17138	2.93226	0.118987
		-1.2	3.44621	2.41619	2.96418	3.13667	2.99081	0.21594			-1.2	2.50645	2.93158	3.02629	3.11452	3.0887	2.93351	0.11132
		-1.1	3.54533	2.47552	2.954	3.14699	3.03046	0.222201			-1.1	2.46369	2.95661	2.92585	3.11791	3.08613	2.91004	0.117446
		-1	3.50098	2.48585	2.96673	3.11395	3.01688	0.209819			-1	2.50302	2.94595	2.97751	3.19605	3.09387	2.94328	0.118654
		-0.9	3.47751	2.49874	2.98966	3.12633	3.02306	0.202735			-0.9	2.57655	2.95809	2.96603	3.13489	3.1533	2.95777	0.103683
		-0.8	3.51273	2.48585	2.94381	3.15112	3.02337	0.214292			-0.8	2.46028	2.88956	2.97751	3.09753	3.12488	2.90995	0.120119
		-0.7	3.51012	2.54518	3.06865	3.07059	3.04863	0.197341			-0.7	2.5167	2.97579	3.04065	3.09073	3.13521	2.95182	0.111964
		-0.6	3.46447	2.48584	2.93871	3.16351	3.01313	0.206135			-0.6	2.53723	2.97221	3.00334	3.11791	3.16363	2.95886	0.111166
		-0.5	3.52316	2.45231	2.97691	3.16558	3.02949	0.223259			-0.5	2.53723	2.88396	2.93447	3.19265	3.1378	2.93722	0.115826
		-0.4	1.60596	3.28558	2.2737	2.4862	2.41286	0.346106			-0.4	1.55228	3.51726	3.57441	2.45885	2.42207	2.70497	0.379805
		-0.3	3.4123	2.56839	2.92086	3.16142	3.01574	0.179722			-0.3	2.4124	2.92828	2.96316	3.06017	3.03704	2.88021	0.119378
		-0.2	3.40317	2.36201	3.04063	3.19448	3.00007	0.225286			-0.2	2.51842	2.7938	2.85986	3.18247	3.22048	2.91501	0.130358
		-0.1	3.50098	2.33622	3.03553	3.19449	3.0168	0.246568			-0.1	2.48422	2.80419	2.75368	3.26059	3.16107	2.89275	0.141666
		-7.9865e-12	3.45012	2.34653	3.08904	3.21514	3.02521	0.238275			-7.9865e-12	2.46198	2.77444	2.79099	3.15528	3.07838	2.85222	0.123506
		0.1	3.56097	2.29236	3.09668	3.2172	3.0418	0.268479			0.1	2.57313	2.74961	2.70777	3.34891	3.28507	2.93289	0.159813
		0.2	3.4762	2.37492	3.02788	3.21927	3.02457	0.235219			0.2	2.46541	2.69634	2.77089	3.23681	3.14297	2.86248	0.143606
		0.3	3.61837	2.23302	3.13999	3.1821	3.04337	0.290957			0.3	2.54748	2.7552	2.69054	3.30476	3.17398	2.89439	0.146261
		0.4	3.44621	2.31816	3.03298	3.23372	3.00777	0.244862			0.4	2.46028	2.76919	2.72785	3.30136	3.10938	2.87361	0.148585
		0.5	3.52838	2.19948	3.15272	3.28327	3.04096	0.2911			0.5	2.49276	2.69113	2.71638	3.20963	3.26442	2.87486	0.153083
		0.6	3.46446	2.24076	3.04826	3.306	3.01487	0.271915			0.6	2.55433	2.68767	2.70489	3.264	3.16622	2.87542	0.141949
		0.7	3.51663	2.23819	3.14763	3.27089	3.04334	0.279125			0.7	2.52526	2.71085	2.66472	3.33533	3.30058	2.90735	0.17048
		0.8	3.46317	2.2614	3.10431	3.27916	3.02701	0.26551			0.8	2.56459	2.75277	2.67046	3.36931	3.13005	2.89743	0.151658
		0.9	3.60011	2.19433	3.27248	3.34523	3.10304	0.310938			0.9	2.53209	2.77082	2.61593	3.39309	3.2489	2.91217	0.172752
		1	3.60009	2.33106	3.42025	3.2998	3.1628	0.284029			1	2.52355	2.83819	2.81969	3.495	3.22822	2.98093	0.17044
		1.1	3.75792	2.39813	3.61644	3.44848	3.30524	0.308913			1.1	2.4825	2.97247	2.92298	3.65465	3.46594	3.09971	0.208621
		1.2	4.07614	2.5168	3.8636	3.64259	3.52478	0.347454			1.2	2.53552	3.1637	3.0263	4.15067	3.5693	3.2891	0.27143
		1.3	4.3396	2.6587	4.32985	3.84701	3.79379	0.395447			1.3	2.55261	3.48755	3.31901	4.41904	3.8122	3.51808	0.305852
		1.4	4.63827	2.96827	4.79867	4.21666	4.15546	0.414326			1.4	2.63299	3.93686	3.73224	4.85048	4.17652	3.86582	0.361167
		1.5	5.18864	3.29075	5.35667	4.64823	4.62107	0.468484			1.5	2.69454	4.50316	4.2172	5.43481	4.71655	4.31325	0.451998
		1.6	7.45146	2.96054	6.58985	5.8707	5.71814	0.974334			1.6	3.67265	4.53165	4.06512	6.71214	5.81209	4.95873	0.567346
		1.7	6.60763	4.10338	6.58731	5.85005	5.78709	0.588253			1.7	2.89632	5.80158	5.34498	6.57626	5.97487	5.3188	0.636937
		1.8	7.24148	4.73799	7.29307	6.66572	6.48456	0.599301			1.8	3.02627	6.68457	6.04232	7.41198	6.72163	5.97735	0.768939
		1.9	8.15703	5.23848	7.95043	7.4566	7.20064	0.670353			1.9	3.21437	7.60265	6.84581	7.96911	7.54328	6.63504	0.874252
		2	9.02564	5.82149	8.73009	8.34248	7.97992	0.732947			2	3.50506	8.54897	7.5288	8.85238	8.59749	7.40654	1.00126
		2.1	9.98424	6.52321	9.44095	9.27999	8.80709	0.776059			2.1	3.7154	9.56629	8.36959	9.5556	9.51476	8.14433	1.13044
		2.2	10.9089	7.01079	10.2257	10.3641	9.62737	0.884571			2.2	4.1429	10.5518	9.15586	10.4355	10.6801	8.99321	1.24311
		2.3	11.9027	7.76151	10.8932	11.2624	10.455	0.921715			2.3	4.47805	11.5709	10.0455	11.0096	11.6361	9.74802	1.34797
		2.4	12.9435	8.34453	11.7392	12.3816	11.3522	1.0323			2.4	4.99446	12.4428	10.8403	11.8351	12.7859	10.5797	1.43488
		2.5	14.0534	8.95852	12.4831	13.315	12.2025	1.12788			2.5	5.49378	13.5252	11.6697	12.6063	13.8737	11.4337	1.53364
		2.6	15.0498	9.61895	13.2628	14.4941	13.1064	1.22097			2.6	5.91101	14.5319	12.3355	13.374	15.0081	12.2321	1.64721
		2.7	16.1675	10.3671	14.0119	15.4563	14.0007	1.29155			2.7	6.47359	15.5471	13.3197	14.1316	16.1062	13.1156	1.73271
		2.8	17.2931	10.9424	14.7202	16.5838	14.8849	1.42174			2.8	7.08576	16.4828	14.0802	14.9877	17.3361	13.9945	1.81772
		2.9	18.4016	11.6234	15.533	17.6556	15.8034	1.52005			2.9	7.73727	17.5143	14.9124	15.7113	18.3464	14.8443	1.87962
		3	19.5598	12.3354	16.4477	18.7892	16.783	1.62349			3	8.38876	18.4676	15.7733	16.4553	19.5763	15.7323	1.95845
		3.1	20.6279	13.001	17.1178	19.8568	17.6509	1.72323			3.1	9.04026	19.5025	16.5338	17.325	20.6667	16.6137	2.03275
		3.2	21.8043	13.6357	17.8592	20.9327	18.558	1.84606			3.2	9.71571	20.4822	17.4549	18.0214	21.7752	17.4899	2.09809
		3.3	22.939	14.2703	18.6338	22.023	19.4665	1.96401			3.3	10.3039	21.5209	18.29	18.8979	22.9302	18.3886	2.19166
		3.4	24.0645	15.0726	19.4771	23.1009	20.4288	2.04029			3.4	11.0734	22.5344	19.1251	19.6283	24.0877	19.2898	2.24942
		3.5	25.2148	15.5602	20.3256	24.1788	21.3199	2.18912			3.5	11.7335	23.5145	19.92	20.4164	25.2169	20.1602	2.3233
		3.6	26.3313	16.2671	20.9829	25.2196	22.2002	2.28885			3.6	12.3491	24.5615	20.9014	21.2046	26.2892	21.0612	2.40345
		3.7	27.4738	16.8527	21.7957	26.3533	23.1188	2.42285			3.7	13.0997	25.584	21.7078	21.901	27.4002	21.9386	2.46271
		3.8	28.5132	17.6575	22.5066	27.3796	24.0142	2.48741			3.8	13.8932	26.6097	22.5887	22.6314	28.5836	22.8613	2.52339
		3.9	29.6505	18.2019	23.3627	28.5318	24.9367	2.62964			3.9	14.5481	27.6533	23.4123	23.423	29.7335	23.754	2.60705
		4	30.8334	18.9216	24.02	29.554	25.8323	2.73714			4	15.2971	28.6564	24.3019	24.1432	30.922	24.6641	2.67623
		4.1	31.9237	19.5098	24.8532	30.6649	26.7379	2.85936			4.1	15.94	29.6276	25.1973	24.9619	32.0615	25.5576	2.75543
		4.2	33.0245	20.1677	25.5692	31.7408	27.6255	2.97114			4.2	16.7488	30.7421	26.1012	25.6142	33.1984	26.4809	2.81861
		4.3	34.0887	20.8126	26.4202	32.8352	28.5392	3.07467			4.3	17.573	31.7042	26.9477	26.4737	34.4206	27.4239	2.87614
		4.4	35.273	21.4911	27.0469	33.971	29.4455	3.2076			4.4	18.1921	32.85	27.8632	27.1225	35.6195	28.3294	2.98346
		4.5	36.3437	22.1	27.8113	35.053	30.327	3.32352			4.5	18.9992	33.7684	28.6781	27.9141	36.8055	29.233	3.03884
		4.6	37.4484	22.7578	28.5527	36.0917	31.2127	3.43085			4.6	19.6729	34.7728	29.5276	28.5018	37.9708	30.0892	3.12562
		4.7	38.4578	23.3615	29.2636	37.2151	32.0745	3.54719			4.7	20.4253	35.8785	30.4372	29.2899	39.1801	31.0422	3.20757
		4.8	39.5377	24.0141	29.9694	38.2785	32.9499	3.65747			4.8	21.1349	36.8123	31.3383	30.0679	40.3247	31.9356	3.27612
		4.9	40.6567	24.672	30.6777	39.3172	33.8309	3.76961			4.9	21.9249	37.7974	32.2681	30.676	41.5805	32.8494	3.35499
		5	41.751	25.2756	31.358	40.4261	34.7027	3.8997			5	22.6021	38.8091	33.1634	31.4064	42.6657	33.7293	3.42924
		5.1	42.8609	25.8845	32.0867	41.3966	35.5572	4.01091			5.1	23.3784	39.6796	33.9554	32.0722	43.8233	34.5818	3.48997
		5.2	43.8651	26.4675	32.7262	42.4271	36.3715	4.12514			5.2	24.0641	40.6469	34.8106	32.7551	44.9602	35.4474	3.56904
		5.3	44.8993	27.0944	33.3555	43.4554	37.2012	4.23589			5.3	24.7891	41.5843	35.617	33.4515	46.1152	36.3114	3.64239
		5.4	45.9923	27.7058	34.0435	44.4404	38.0455	4.34906			5.4	25.545	42.4738	36.5066	34.1004	47.221	37.1694	3.70242
		5.5	47.05	28.2785	34.6601	45.3718	38.8401	4.4636			5.5	26.2324	43.3634	37.3158	34.7221	48.3786	38.0025	3.78267
		5.6	48.049	28.8125	35.3582	46.4744	39.6736	4.59152			5.6	26.9215	44.2442	38.0935	35.4049	49.5077	38.8344	3.85626
		5.7	49.125	29.442	36.013	47.4698	40.5124	4.70266			5.7	27.5832	45.1039	38.9343	36.0436	50.7041	39.6738	3.94373
		5.8	50.094	29.9915	36.6347	48.4445	41.2912	4.81339			5.8	28.2638	46.0024	39.7263	36.7264	51.8151	40.5068	4.01791
		5.9	51.0526	30.5178	37.2487	49.446	42.0663	4.93112			5.9	28.9444	46.8143	40.5327	37.2224	52.9495	41.2927	4.09875
		6	52.1443	31.1137	37.9316	50.4434	42.9082	5.04942			6	29.7036	47.6579	41.2931	37.9664	54.0734	42.1389	4.15725
		6.1	53.1342	31.7329	38.6093	51.4428	43.7298	5.14845			6.1	30.35	48.4979	42.0794	38.5983	55.2568	42.9565	4.24672
		6.2	54.0941	32.1998	39.2259	52.4071	44.4817	5.27319			6.2	30.9673	49.3063	42.8313	39.2641	56.3834	43.7505	4.32921
		6.3	55.0866	32.6925	39.8603	53.3756	45.2538	5.39693			6.3	31.6051	50.1232	43.5831	39.8586	57.5772	44.5494	4.42313
		6.4	55.9656	33.273	40.561	54.4164	46.054	5.49012			6.4	32.2429	50.9725	44.3235	40.4905	58.6159	45.3291	4.49476
		6.5	56.8277	33.8044	41.1037	55.3167	46.7631	5.58582			6.5	32.8226	51.6798	45.0955	41.0646	59.8587	46.1042	4.5994
		6.6	57.8685	34.341	41.7534	56.2873	47.5625	5.70735			6.6	33.469	52.4441	45.7956	41.8358	60.8147	46.8719	4.64548
		6.7	58.7801	34.8776	42.4006	57.138	48.2991	5.79445			6.7	34.0846	53.2559	46.4815	42.3963	61.9671	47.6371	4.74021
		6.8	59.6787	35.3291	42.9942	58.0528	49.0137	5.90868			6.8	34.6266	53.9599	47.2592	42.9603	62.8715	48.3355	4.80059
		6.9	60.6112	35.7728	43.542	58.9098	49.709	6.02607			6.9	35.2662	54.6972	47.8561	43.5276	63.9722	49.0639	4.88098
		7	61.489	36.3352	44.123	59.7523	50.4249	6.1077			7	35.7826	55.3713	48.6022	44.1289	64.9902	49.775	4.95915
		7.1	62.3158	36.8099	44.7217	60.6774	51.1312	6.20757			7.1	36.4273	56.1016	49.2421	44.6759	65.998	50.489	5.02548
		7.2	63.1936	37.2201	45.2899	61.4291	51.7832	6.30798			7.2	36.9197	56.7735	49.8677	45.3179	66.9075	51.1573	5.0896
		7.3	64.1352	37.7076	45.8148	62.2984	52.489	6.42192			7.3	37.8893	57.1774	50.1489	46.1095	68.2899	51.923	5.14477
		7.4	64.8851	38.1694	46.3779	63.0521	53.1211	6.49385			7.4	38.1116	58.1144	51.1763	46.3779	68.8505	52.5261	5.22072
		7.5	65.7081	38.5409	46.8696	63.8472	53.7414	6.60558			7.5	38.4741	58.8751	51.8592	46.738	69.7394	53.1371	5.32046
		7.6	66.5506	38.9563	47.2977	64.574	54.3446	6.70875			7.6	38.9683	59.5174	52.4475	47.2034	70.5998	53.7473	5.38625
		7.7	67.2862	39.4335	47.9601	65.3443	55.006	6.76898			7.7	39.4727	60.0655	53.0473	47.8013	71.4913	54.3756	5.44244
		7.8	68.1887	39.805	48.271	66.0587	55.5809	6.89841			7.8	39.9806	60.6771	53.6298	48.1716	72.424	54.9766	5.52228
		7.9	68.8904	40.1791	48.834	66.7815	56.1713	6.97578			7.9	40.4457	61.2398	54.1664	48.671	73.3155	55.5677	5.59177
		8	69.6846	40.5918	49.2264	67.6013	56.776	7.08722			8	40.8852	61.719	54.7289	49.1126	74.1449	56.1181	5.65413
		8.1	70.4085	40.935	49.764	68.2105	57.3295	7.16166			8.1	41.3742	62.3488	55.1708	49.6256	75.0983	56.7235	5.73441
		8.2	71.1545	41.3529	50.1386	68.8547	57.8752	7.24415			8.2	41.8462	62.8723	55.7046	50.0095	75.8786	57.2622	5.79106
		8.3	71.9031	41.6676	50.5895	69.6002	58.4401	7.35271			8.3	42.2942	63.408	56.2584	50.5734	76.7701	57.8608	5.85801
		8.4	72.6374	42.0081	51.0533	70.2114	58.9776	7.4361			8.4	42.7114	63.9496	56.8008	50.9301	77.5866	58.3957	5.93048
		8.5	73.1617	42.3151	51.4354	70.8784	59.4477	7.50808			8.5	43.0962	64.5596	57.3345	51.6062	78.4858	59.0164	6.00407
		8.6	73.9403	42.746	51.8329	71.5454	60.0161	7.59402			8.6	43.5835	65.1933	58.0462	52.1531	79.4599	59.6872	6.08301
		8.7	74.6368	43.0607	52.2177	72.2062	60.5303	7.68985			8.7	44.0315	65.9679	58.6948	52.8393	80.4521	60.3971	6.16882
		8.8	75.2667	43.2929	52.61	72.7947	60.9911	7.78132			8.8	44.4949	66.6826	59.4351	53.5052	81.5502	61.1336	6.26719
		8.9	75.8992	43.5483	53.0075	73.408	61.4658	7.87147			8.9	44.9686	67.5459	60.2157	54.4734	82.775	61.9957	6.37283
		9	76.4913	43.8759	53.3795	73.9883	61.9338	7.93986			9	45.4063	68.4655	61.0938	55.2004	83.9403	62.8213	6.48927
		9.1	77.1526	44.1055	53.7133	74.5417	62.3783	8.03744			9.1	45.9775	69.4721	62.0465	56.138	85.2503	63.7769	6.60192
		9.2	77.6234	44.3635	54.0598	75.1344	62.7953	8.10435			9.2	46.4973	70.5089	62.9562	57.0791	86.5836	64.725	6.72714
		9.3	78.1686	44.6808	54.4369	75.6919	63.2445	8.1642			9.3	46.5007	72.012	64.3767	57.6158	87.4931	65.5997	6.89365
		9.4	78.7607	44.8536	54.7605	76.2846	63.6648	8.26786			9.4	47.749	72.7926	65.0252	58.9951	89.2656	66.7655	6.95563
		9.5	79.3058	45.1271	55.0968	76.745	64.0687	8.32736			9.5	48.5219	73.9172	65.9693	60.055	90.7074	67.8342	7.06097
		9.6	79.7688	45.3774	55.4357	77.3232	64.4763	8.39349			9.6	49.2042	75.131	67.0225	61.1047	92.1854	68.9296	7.18765
		9.7	80.224	45.5786	55.7108	77.7672	64.8202	8.45638			9.7	50.0164	76.3921	68.2191	62.1341	93.5781	70.068	7.28406
		9.8	80.7353	45.8236	56.0523	78.2256	65.2092	8.51536			9.8	50.8064	77.715	69.1948	63.177	94.9579	71.1702	7.38635
		9.9	81.2713	45.9991	56.3809	78.6965	65.5869	8.59406			9.9	51.6136	79.0541	70.4173	64.2539	96.3713	72.342	7.48748
		10	81.716	46.1848	56.5822	79.1425	65.9064	8.66516			10	52.5985	80.3721	71.5422	65.3682	97.919	73.56	7.58395
		10.1	82.0969	46.3628	56.8905	79.5844	66.2336	8.71793			10.1	53.3902	81.7422	72.7934	66.3228	99.2419	74.6981	7.68055
		10.2	82.5768	46.5434	57.1529	79.8962	66.5423	8.77282			10.2	54.3786	83.1225	73.8953	67.4541	100.681	75.9063	7.76142
		10.3	82.9955	46.6801	57.3848	80.3484	66.8522	8.8473			10.3	55.2319	84.5425	75.1465	68.6499	102.169	77.1481	7.86541
		10.4	83.3437	46.9433	57.6116	80.6045	67.1258	8.86261			10.4	56.2921	85.8849	76.2456	69.6895	103.712	78.3648	7.9561
		10.5	83.7624	47.0232	57.8689	81.0258	67.4201	8.94167			10.5	57.171	87.4184	77.5254	70.7494	105.218	79.6165	8.07195
		10.6	84.0558	47.1755	58.0778	81.2901	67.6498	8.97234			10.6	58.2089	88.8619	78.6503	72.0267	106.665	80.8827	8.14225
		10.7	84.5097	47.3612	58.2129	81.5936	67.9193	9.03271			10.7	59.2332	90.381	79.8958	73.0187	108.187	82.1432	8.24417
		10.8	84.7757	47.4773	58.4651	81.8435	68.1404	9.06037			10.8	60.172	91.7857	81.0436	74.2723	109.655	83.3857	8.3308
		10.9	85.1748	47.6269	58.6638	82.145	68.4026	9.11332			10.9	61.2595	93.2821	82.3006	75.3118	111.265	84.6837	8.4341
		11	85.4943	47.7275	58.7963	82.399	68.6043	9.16334			11	62.3077	94.8154	83.4283	76.4465	112.686	85.9368	8.51184
		11.1	85.8452	47.7714	58.9212	82.6468	68.7961	9.22887			11.1	63.291	96.3084	84.6824	77.6661	114.218	87.2332	8.60756
		11.2	86.0395	47.9365	59.1097	82.8656	68.9878	9.23801			11.2	64.358	97.8121	85.9335	78.8144	115.799	88.5435	8.704
		11.3	86.3473	47.9881	59.2295	83.0763	69.1603	9.29126			11.3	65.4131	99.3346	87.1044	79.8947	117.303	89.81	8.79612
		11.4	86.6303	48.2306	59.3823	83.2621	69.3763	9.29847			11.4	66.4596	100.821	88.2522	81.0191	118.915	91.0934	8.90245
		11.5	86.8899	48.1119	59.469	83.4583	69.4823	9.37777			11.5	67.5608	102.386	89.4718	82.198	120.396	92.4024	8.9809
		11.6	87.1429	48.2951	59.5454	83.607	69.6476	9.39385			11.6	68.544	103.876	90.6513	83.3258	121.949	93.6691	9.08647
		11.7	87.3998	48.2951	59.7136	83.8548	69.8158	9.44937			11.7	69.765	105.387	91.8938	84.3858	123.504	94.9873	9.16383
		11.8	87.6463	48.4138	59.7696	84.0138	69.9609	9.47979			11.8	70.6901	106.943	93.0503	85.5918	124.936	96.2421	9.25839
		11.9	87.8354	48.4344	59.8461	84.1852	70.0753	9.51961			11.9	71.7588	108.451	94.2613	86.6585	126.497	97.5253	9.35778
		12	87.9893	48.4783	59.9786	84.274	70.18	9.53435			12	72.86	109.919	95.412	87.8577	128.078	98.8254	9.44701
		12.1	88.2606	48.4911	60.0907	84.4474	70.3225	9.58552			12.1	73.8809	111.555	96.5943	88.8497	129.53	100.082	9.54895
		12.2	88.361	48.5427	60.1034	84.6457	70.4132	9.61464			12.2	74.965	112.987	97.7364	90.0251	130.974	101.338	9.61897
		12.3	88.4979	48.4989	60.1824	84.6746	70.4635	9.6408			12.3	75.9243	114.47	98.8039	91.0137	132.478	102.538	9.73097
		12.4	88.6818	48.5763	60.2614	84.8336	70.5883	9.66729			12.4	77.0307	116.02	100.049	92.1789	133.912	103.838	9.80249
		12.5	88.8397	48.6072	60.269	84.846	70.6405	9.68692			12.5	78.0378	117.421	101.134	93.2287	135.349	105.034	9.88885
		12.6	88.9609	48.6382	60.3098	84.9389	70.712	9.70776			12.6	79.1408	118.893	102.293	94.2784	136.742	106.269	9.95853
		12.7	89.0079	48.6098	60.3964	85.0236	70.7594	9.72312			12.7	80.189	120.4	103.344	95.2976	138.176	107.481	10.0485
		12.8	89.1435	48.5479	60.4117	85.1351	70.8096	9.76837			12.8	81.2286	121.822	104.472	96.3337	139.506	108.672	10.116
		12.9	89.2335	48.5711	60.4474	85.1206	70.8432	9.77312			12.9	82.176	123.237	105.533	97.3665	140.86	109.835	10.2009
		13	89.3718	48.5505	60.5162	85.1227	70.8903	9.79292			13	83.2721	124.638	106.555	98.3211	142.152	110.988	10.2611
		13.1	89.3939	48.5556	60.4525	85.2693	70.9178	9.81887			13.1	84.2279	126.03	107.703	99.3301	143.434	112.145	10.3322
		13.2	89.4918	48.455	60.5136	85.1268	70.8968	9.83069			13.2	85.2916	127.396	108.693	100.288	144.718	113.277	10.3942
		13.3	89.5517	48.4447	60.5009	85.1846	70.9205	9.8502			13.3	86.2167	128.77	109.726	101.266	145.961	114.388	10.4671
		13.4	89.5622	48.4292	60.478	85.069	70.8846	9.8429			13.4	87.193	130.141	110.788	102.163	147.185	115.494	10.5349
		13.5	89.5922	48.3518	60.4907	85.0752	70.8775	9.86199			13.5	88.2002	131.431	111.812	103.047	148.338	116.565	10.584
		13.6	89.5935	48.3493	60.4856	84.9988	70.8568	9.85398			13.6	89.1783	132.734	112.765	103.916	149.594	117.637	10.6561
		13.7	89.6339	48.2332	60.348	84.9389	70.7885	9.88741			13.7	90.1188	134.087	113.778	104.918	150.72	118.725	10.7077
		13.8	89.5909	48.1893	60.3353	84.8646	70.745	9.88117			13.8	91.0884	135.327	114.742	105.608	151.891	119.731	10.7755
		13.9	89.5218	48.0913	60.2665	84.7179	70.6494	9.87743			13.9	92.0237	136.615	115.746	106.413	153.074	120.775	10.8451
		14	89.5192	48.0319	60.2385	84.5879	70.5944	9.87536			14	92.9095	137.852	116.602	107.31	154.139	121.762	10.8974
		14.1	89.5609	47.97	60.1493	84.4454	70.5314	9.88485			14.1	93.8466	139.138	117.592	108.007	155.203	122.757	10.9571
		14.2	89.4461	47.8359	60.1034	84.2822	70.4169	9.87686			14.2	94.7768	140.307	118.49	108.767	156.322	123.733	11.0151
		14.3	89.4187	47.8694	59.9505	84.1191	70.3395	9.8604			14.3	95.7156	141.49	119.397	109.62	157.402	124.725	11.0611
		14.4	89.3822	47.6914	59.841	83.9869	70.2254	9.88256			14.4	96.5552	142.615	120.235	110.232	158.41	125.609	11.1234
		14.5	89.257	47.6011	59.6957	83.7102	70.066	9.86016			14.5	97.4153	143.827	121.141	110.969	159.461	126.563	11.186
		14.6	89.2348	47.4954	59.6244	83.5223	69.9692	9.86129			14.6	98.2395	144.926	122.017	111.689	160.479	127.47	11.2417
		14.7	89.1383	47.4025	59.4333	83.3323	69.8266	9.8582			14.7	99.1543	146.12	122.832	112.399	161.487	128.398	11.294
		14.8	89.0392	47.2993	59.3314	83.13	69.7	9.84745			14.8	99.9478	147.178	123.655	112.994	162.381	129.231	11.343
		14.9	88.8853	47.1729	59.1556	82.8822	69.524	9.83352			14.9	100.799	148.276	124.419	113.775	163.394	130.133	11.3934
		15	88.8123	47.111	58.9747	82.6757	69.3934	9.82585			15	101.54	149.302	125.348	114.271	164.309	130.954	11.4546
		15.1	88.6988	46.9484	58.7989	82.3907	69.2092	9.82138			15.1	102.253	150.392	126.063	114.916	165.182	131.761	11.5131
		15.2	88.5306	46.8091	58.6103	82.0913	69.0103	9.80308			15.2	103.216	151.262	126.697	115.603	166.143	132.584	11.5339
		15.3	88.4823	46.7524	58.3759	81.8745	68.8713	9.80252			15.3	104.014	152.311	127.394	116.204	167.014	133.388	11.582
		15.4	88.3114	46.626	58.2154	81.5606	68.6784	9.77749			15.4	104.765	153.267	128.106	116.775	167.903	134.163	11.6333
		15.5	88.1667	46.4506	57.9887	81.2735	68.4699	9.77499			15.5	105.509	154.238	128.915	117.458	168.694	134.963	11.6616
		15.6	88.0376	46.2957	57.7517	81.0134	68.2746	9.77519			15.6	106.217	155.202	129.615	117.875	169.541	135.69	11.7251
		15.7	87.8106	46.2338	57.4842	80.7676	68.0741	9.74594			15.7	106.933	156.136	130.241	118.568	170.239	136.423	11.7447
		15.8	87.7454	46.0842	57.2574	80.4269	67.8785	9.74661			15.8	107.653	157.061	131.042	119.058	171.138	137.19	11.8033
		15.9	87.5054	45.9346	57.0179	80.1419	67.65	9.72492			15.9	108.318	158.008	131.716	119.52	171.794	137.871	11.8412
		16	87.2929	45.705	56.8243	79.8281	67.4125	9.71555			16	109.045	158.907	132.399	120.087	172.562	138.6	11.8753
		16.1	87.1572	45.6044	56.6051	79.4378	67.2011	9.68967			16.1	109.654	159.74	133.03	120.644	173.383	139.29	11.9284
		16.2	86.8951	45.4006	56.3019	79.2024	66.95	9.68541			16.2	110.312	160.681	133.736	121.157	174.078	139.993	11.9681
		16.3	86.7712	45.318	56.0854	78.8369	66.7529	9.66094			16.3	110.975	161.599	134.396	121.833	174.838	140.728	12.003
		16.4	86.5586	45.1477	55.7745	78.523	66.501	9.65166			16.4	111.635	162.507	135.217	122.397	175.655	141.482	12.0501
		16.5	86.3669	44.9672	55.5809	78.1513	66.2666	9.63119			16.5	112.29	163.462	135.912	122.998	176.466	142.226	12.1018
		16.6	86.1386	44.7866	55.2267	77.8333	65.9963	9.6249			16.6	112.885	164.511	136.617	123.627	177.329	142.994	12.174
		16.7	85.9143	44.6885	55.0203	77.4595	65.7707	9.5848			16.7	113.59	165.457	137.539	124.344	178.161	143.818	12.2068
		16.8	85.6887	44.5131	54.6968	77.0507	65.4873	9.56625			16.8	114.142	166.554	138.267	124.969	179.029	144.592	12.2892
		16.9	85.4409	44.3429	54.4725	76.7368	65.2483	9.54323			16.9	114.905	167.656	139.143	125.703	179.879	145.457	12.3313
		17	85.2844	44.1623	54.1413	76.3093	64.9743	9.5371			17	115.768	168.585	139.852	126.504	180.941	146.33	12.3739
		17.1	84.9335	43.9765	53.8534	75.9149	64.6696	9.49683			17.1	116.278	169.865	140.962	127.225	181.724	147.211	12.4494
		17.2	84.6714	43.8217	53.5961	75.5742	64.4158	9.46916			17.2	116.912	171.021	141.9	127.85	182.644	148.065	12.5296
		17.3	84.4679	43.6076	53.247	75.1963	64.1297	9.46794			17.3	117.518	172.254	142.799	128.577	183.499	148.929	12.6048
		17.4	84.121	43.3909	52.9973	74.7255	63.8087	9.4231			17.4	118.335	173.343	143.662	129.334	184.437	149.822	12.6502
		17.5	83.9267	43.2774	52.6483	74.3724	63.5562	9.40815			17.5	119.161	174.567	144.495	130.095	185.427	150.749	12.7149
		17.6	83.6293	43.1097	52.475	73.9883	63.3006	9.3646			17.6	119.876	175.602	145.41	130.883	186.359	151.626	12.7637
		17.7	83.3567	42.8621	52.103	73.5154	62.9593	9.35078			17.7	120.65	176.805	146.3	131.654	187.362	152.554	12.8325
		17.8	83.0568	42.6944	51.759	73.1127	62.6557	9.32177			17.8	121.553	177.831	147.149	132.504	188.354	153.478	12.8619
		17.9	82.7229	42.5215	51.4762	72.6791	62.3499	9.27879			17.9	122.289	179.105	148.033	133.231	189.269	154.385	12.9344
		18	82.4334	42.2868	51.1654	72.2475	62.0332	9.25801			18	123.193	180.17	148.968	134.033	190.251	155.323	12.9678
		18.1	82.136	42.0675	50.8571	71.7911	61.7129	9.23068			18.1	123.993	181.367	149.826	134.817	191.196	156.24	13.0254
		18.2	81.8608	41.8482	50.5462	71.3802	61.4089	9.21197			18.2	124.847	182.472	150.719	135.673	192.132	157.169	13.0596
		18.3	81.3965	41.6805	50.2354	70.9321	61.0611	9.14589			18.3	125.733	183.621	151.637	136.383	193.106	158.096	13.1106
		18.4	81.1957	41.5515	49.8812	70.484	60.7781	9.12636			18.4	126.603	184.745	152.564	137.189	193.997	159.02	13.1422
		18.5	80.8396	41.2574	49.5398	70.1185	60.4388	9.11319			18.5	127.487	185.842	153.399	138.017	195.003	159.95	13.185
		18.6	80.4914	41.1078	49.1933	69.5713	60.0909	9.06078			18.6	128.393	186.949	154.295	138.772	195.907	160.863	13.2175
		18.7	80.0988	40.8343	48.9411	69.1356	59.7524	9.02219			18.7	129.276	188.071	155.204	139.533	196.842	161.785	13.2576
		18.8	79.8184	40.6228	48.5945	68.673	59.4272	9.0011			18.8	130.158	189.231	156.131	140.334	197.796	162.73	13.3003
		18.9	79.3698	40.37	48.2429	68.2662	59.0622	8.96087			18.9	131.028	190.253	156.915	141.078	198.628	163.58	13.3232
		19	79.0893	40.2358	47.9321	67.7706	58.757	8.9203			19	131.894	191.373	157.887	141.873	199.615	164.528	13.368
		19.1	78.6772	39.9469	47.5677	67.3494	58.3853	8.8934			19.1	132.822	192.441	158.642	142.665	200.493	165.413	13.3915
		19.2	78.3042	39.6992	47.2594	66.8434	58.0266	8.8541			19.2	133.768	193.508	159.646	143.337	201.361	166.324	13.4154
		19.3	77.8777	39.5806	46.8187	66.3933	57.6676	8.8007			19.3	134.585	194.606	160.401	144.075	202.302	167.194	13.4685
		19.4	77.476	39.2916	46.5511	65.9431	57.3155	8.76363			19.4	135.466	195.658	161.305	144.876	203.196	168.1	13.4939
		19.5	77.1291	39.0491	46.2072	65.4661	56.9629	8.73484			19.5	136.41	196.699	162.123	145.552	204.069	168.971	13.5209
		19.6	76.6792	38.8685	45.9141	65.0015	56.6158	8.67155			19.6	137.283	197.738	162.947	146.324	204.899	169.838	13.5423
		19.7	76.2788	38.626	45.5549	64.5472	56.2517	8.63609			19.7	138.241	198.802	163.825	147.017	205.909	170.759	13.5851
		19.8	75.804	38.3629	45.1752	64.1073	55.8624	8.5931			19.8	138.94	199.763	164.697	147.635	206.653	171.538	13.6208
		19.9	75.4219	38.172	44.9103	63.6035	55.5269	8.53887			19.9	139.942	200.793	165.498	148.331	207.545	172.422	13.6414
		20	74.9172	37.8676	44.4975	63.1079	55.0975	8.49615			20	140.763	201.743	166.316	149.065	208.462	173.27	13.675
		20.1	74.5507	37.6122	44.1688	62.7197	54.7628	8.47176			20.1	141.721	202.765	167.116	149.656	209.289	174.109	13.7014
		20.2	74.0864	37.4445	43.8402	62.2055	54.3941	8.40376			20.2	142.501	203.727	167.885	150.356	210.149	174.924	13.7383
		20.3	73.6834	37.1349	43.4503	61.7615	54.0075	8.38353			20.3	143.349	204.71	168.7	151.059	211.025	175.769	13.7699
		20.4	73.1604	36.9002	43.1828	61.2804	53.6309	8.31162			20.4	144.281	205.678	169.507	151.582	211.87	176.584	13.8026
		20.5	72.6661	36.7273	42.8261	60.7786	53.2495	8.24278			20.5	145.059	206.537	170.261	152.235	212.635	177.345	13.8214
		20.6	72.2135	36.4332	42.4923	60.3573	52.8741	8.20618			20.6	145.931	207.494	170.99	152.962	213.555	178.186	13.8534
		20.7	71.7831	36.1598	42.1458	59.9196	52.5021	8.17059			20.7	146.789	208.415	171.854	153.475	214.34	178.975	13.8822
		20.8	71.3045	35.9328	41.8044	59.4219	52.1159	8.11275			20.8	147.567	209.289	172.497	154.103	215.151	179.722	13.9139
		20.9	70.8493	35.649	41.5088	58.9593	51.7416	8.06682			20.9	148.441	210.181	173.266	154.694	215.981	180.513	13.9389
		21	70.3055	35.4194	41.1929	58.4761	51.3485	7.99501			21	149.24	211.04	174.046	155.217	216.805	181.27	13.9747
		21.1	69.9064	35.1382	40.8769	58.0136	50.9838	7.96196			21.1	149.98	211.892	174.727	155.822	217.58	182	14.0053
		21.2	69.2869	34.9421	40.5253	57.5531	50.5768	7.87512			21.2	150.796	212.734	175.387	156.362	218.392	182.734	14.0374
		21.3	68.8826	34.6609	40.189	57.1194	50.213	7.84538			21.3	151.616	213.548	176.164	156.926	219.128	183.477	14.0513
		21.4	68.413	34.4158	39.9036	56.6362	49.8422	7.78772			21.4	152.331	214.361	176.821	157.327	219.932	184.155	14.1044
		21.5	67.9487	34.2043	39.6285	56.1571	49.4847	7.72484			21.5	153.096	215.185	177.536	157.908	220.642	184.873	14.1227
		21.6	67.3971	33.9025	39.2361	55.6967	49.0581	7.67329			21.6	153.836	215.942	178.139	158.431	221.466	185.563	14.1595
		21.7	66.9575	33.6806	38.9151	55.2506	48.701	7.62439			21.7	154.611	216.668	178.761	158.924	222.167	186.226	14.1758
		21.8	66.3615	33.3401	38.5889	54.8252	48.2789	7.56582			21.8	155.351	217.485	179.473	159.345	222.924	186.916	14.2178
		21.9	65.9468	33.1285	38.3469	54.3565	47.9447	7.51012			21.9	156.018	218.208	180.139	159.838	223.668	187.574	14.2506
		22	65.4238	32.9118	38.0055	53.8898	47.5577	7.44446			22	156.776	218.931	180.79	160.228	224.327	188.21	14.273
		22.1	64.9556	32.6693	37.6844	53.4954	47.2012	7.39695			22.1	157.437	219.633	181.315	160.748	225.035	188.834	14.3007
		22.2	64.4547	32.3236	37.4296	53.0122	46.805	7.34649			22.2	158.102	220.33	181.938	161.152	225.694	189.443	14.3301
		22.3	63.9787	32.0811	37.0525	52.5331	46.4114	7.29744			22.3	158.841	220.958	182.538	161.563	226.394	190.059	14.3494
		22.4	63.4714	31.7922	36.757	52.0829	46.0259	7.24306			22.4	159.435	221.597	183.115	161.964	227.086	190.639	14.3864
		22.5	63.0188	31.6477	36.4181	51.6865	45.6928	7.18447			22.5	160.112	222.295	183.657	162.365	227.776	191.241	14.4214
		22.6	62.5049	31.3536	36.1633	51.2239	45.3115	7.12439			22.6	160.792	222.956	184.265	162.786	228.433	191.847	14.4442
		22.7	61.9924	31.0905	35.8703	50.7841	44.9343	7.0652			22.7	160.837	223.786	184.98	162.848	228.67	192.224	14.5346
		22.8	61.4433	30.8609	35.5187	50.3153	44.5346	6.99749			22.8	162.135	224.183	185.433	163.595	229.774	193.024	14.4901
		22.9	61.0664	30.6287	35.2384	49.9023	44.209	6.96109			22.9	162.571	224.792	186.019	163.85	230.239	193.494	14.527
		23	60.5278	30.3398	34.9938	49.4749	43.8341	6.89652			23	163.186	225.399	186.515	164.166	230.825	194.018	14.556
		23.1	60.0269	30.1231	34.6626	48.9483	43.4402	6.83039			23.1	163.747	225.952	187.009	164.543	231.505	194.551	14.5909
		23.2	59.5366	29.829	34.311	48.589	43.0664	6.79247			23.2	164.293	226.475	187.471	164.947	232.102	195.057	14.6117
		23.3	59.0383	29.6045	34.0384	48.1512	42.7081	6.72788			23.3	164.853	226.934	187.956	165.212	232.737	195.538	14.6427
		23.4	58.6145	29.4162	33.7581	47.7155	42.3761	6.67347			23.4	165.452	227.459	188.478	165.518	233.293	196.04	14.6617
		23.5	58.0458	29.0757	33.4345	47.2839	41.96	6.61934			23.5	166.006	227.943	188.86	165.895	233.9	196.521	14.684
		23.6	57.5841	28.8874	33.139	46.9432	41.6384	6.56529			23.6	166.512	228.461	189.33	166.238	234.52	197.012	14.7177
		23.7	57.1316	28.6913	32.8281	46.4331	41.271	6.50472			23.7	167.001	228.955	189.709	166.544	235.019	197.445	14.7414
		23.8	56.6008	28.4178	32.5275	46.0594	40.9014	6.44875			23.8	167.536	229.372	190.217	166.897	235.551	197.915	14.7483
		23.9	56.2134	28.1934	32.3389	45.5886	40.5836	6.39553			23.9	167.986	229.949	190.665	167.125	236.058	198.356	14.7926
		24	55.7622	27.9277	31.9058	45.1818	40.1944	6.3666			24	168.499	230.433	191.043	167.485	236.618	198.816	14.8152
		24.1	55.2339	27.711	31.6561	44.7977	39.8497	6.29578			24.1	169	230.896	191.557	167.821	237.22	199.299	14.8412
		24.2	54.7214	27.4272	31.4038	44.3888	39.4853	6.23759			24.2	169.469	231.376	192.074	168.215	237.771	199.781	14.8595
		24.3	54.3445	27.2156	31.0675	43.9965	39.156	6.20561			24.3	169.912	231.882	192.547	168.562	238.347	200.25	14.8927
		24.4	53.8032	27.0583	30.8306	43.5752	38.8168	6.11881			24.4	170.399	232.474	193.032	168.925	238.869	200.74	14.9215
		24.5	53.3715	26.7848	30.5579	43.1333	38.4619	6.07553			24.5	170.855	232.96	193.606	169.319	239.479	201.244	14.9479
		24.6	52.8433	26.5475	30.1885	42.807	38.0966	6.02477			24.6	171.353	233.563	194.085	169.717	240.003	201.744	14.9737
		24.7	52.4794	26.3514	29.9286	42.4168	37.7941	5.98491			24.7	172.07	234.076	194.633	170.342	240.595	202.343	14.9503
		24.8	51.9656	26.078	29.6356	41.9191	37.3996	5.92349			24.8	172.225	234.695	195.167	170.658	241.112	202.771	15.0188
		24.9	51.5248	25.8896	29.4114	41.597	37.1057	5.86716			24.9	172.844	235.277	195.629	171.072	241.732	203.311	15.0409
		25	51.0918	25.6213	29.0776	41.1964	36.7468	5.83216			25	173.369	235.825	196.232	171.524	242.321	203.854	15.0574
		25.1	50.604	25.4046	28.8279	40.771	36.4019	5.76695			25.1	173.843	236.487	196.711	172.064	242.863	204.394	15.0789
		25.2	50.1632	25.2137	28.5451	40.4344	36.0891	5.71654			25.2	174.39	237.07	197.414	172.499	243.44	204.963	15.0946
		25.3	49.7093	24.9403	28.2827	40.0792	35.7529	5.67314			25.3	174.894	237.735	197.965	172.903	243.985	205.497	15.1265
		25.4	49.2854	24.8036	27.9514	39.6476	35.422	5.61702			25.4	175.45	238.45	198.568	173.314	244.533	206.063	15.1568
		25.5	48.7676	24.6101	27.6941	39.3152	35.0967	5.54871			25.5	175.975	239.1	199.262	173.855	245.083	206.655	15.1677
		25.6	48.3203	24.3392	27.4597	38.9414	34.7651	5.50192			25.6	176.536	239.703	199.787	174.317	245.62	207.193	15.1808
		25.7	47.8573	24.1767	27.159	38.5738	34.4417	5.44259			25.7	177.111	240.388	200.321	174.683	246.248	207.75	15.2229
		25.8	47.4752	23.9883	26.9144	38.2145	34.1481	5.39825			25.8	177.668	241.019	200.99	175.241	246.698	208.323	15.2145
		25.9	47.0396	23.7304	26.5679	37.8511	33.7972	5.36499			25.9	178.202	241.62	201.449	175.567	247.284	208.824	15.2528
		26	46.5153	23.5472	26.41	37.5062	33.4947	5.28184			26	178.785	242.291	202.077	176.07	247.788	209.402	15.2599
		26.1	46.2375	23.3873	26.0354	37.1965	33.2142	5.27232			26.1	179.352	242.961	202.657	176.542	248.455	209.993	15.2935
		26.2	45.691	23.1551	25.8392	36.7504	32.8589	5.19011			26.2	179.944	243.571	203.171	177.021	248.855	210.512	15.2857
		26.3	45.3232	22.941	25.5157	36.5171	32.5742	5.16967			26.3	180.561	244.188	203.828	177.456	249.419	211.09	15.298
		26.4	44.8954	22.7346	25.3246	36.0876	32.2605	5.10832			26.4	181.103	244.819	204.278	177.89	249.969	211.612	15.3227
		26.5	44.4911	22.6443	25.057	35.8109	32.0008	5.05211			26.5	181.671	245.525	204.956	178.298	250.478	212.186	15.3454
		26.6	44.0516	22.376	24.815	35.466	31.6771	5.00902			26.6	182.288	246.054	205.466	178.733	250.917	212.692	15.3362
		26.7	43.6317	22.1902	24.4965	35.1005	31.3547	4.96469			26.7	182.834	246.692	206.032	179.175	251.507	213.248	15.3628
		26.8	43.2247	22.0664	24.3105	34.7805	31.0955	4.90118			26.8	183.448	247.284	206.603	179.592	252.059	213.797	15.3756
		26.9	42.7878	21.811	24.0149	34.4934	30.7768	4.86643			26.9	183.973	247.914	207.079	180.031	252.571	214.314	15.3962
		27	42.4722	21.6278	23.7678	34.1568	30.5062	4.83687			27	184.535	248.492	207.665	180.394	253.013	214.82	15.4046
		27.1	41.9975	21.455	23.6073	33.845	30.2262	4.76448			27.1	185.13	249.086	208.164	180.877	253.457	215.343	15.4006
		27.2	41.5149	21.2667	23.299	33.5105	29.8978	4.70859			27.2	185.659	249.677	208.769	181.128	253.951	215.837	15.4325
		27.3	41.2697	21.1532	23.0748	33.2895	29.6968	4.68762			27.3	186.257	250.253	209.306	181.59	254.493	216.38	15.4399
		27.4	40.7898	20.9184	22.8913	32.9695	29.3922	4.62573			27.4	186.815	250.74	209.791	181.994	254.959	216.86	15.4397
		27.5	40.3933	20.7172	22.5244	32.637	29.068	4.59669			27.5	187.376	251.33	210.319	182.412	255.457	217.379	15.4522
		27.6	40.0881	20.5882	22.4149	32.35	28.8603	4.54801			27.6	187.882	251.856	210.856	182.789	255.912	217.859	15.4619
		27.7	39.6303	20.3689	22.1804	32.0464	28.5565	4.49537			27.7	188.441	252.434	211.283	183.146	256.408	218.342	15.4822
		27.8	39.3277	20.2864	21.9333	31.811	28.3396	4.45987			27.8	189.021	252.963	211.831	183.523	256.809	218.829	15.4784
		27.9	38.8595	19.9948	21.6734	31.4951	28.0057	4.41827			27.9	189.552	253.511	212.331	183.9	257.274	219.314	15.4904
		28	38.4944	19.9174	21.5129	31.2452	27.7925	4.35795			28	190.106	254.027	212.778	184.321	257.731	219.793	15.492
		28.1	38.1383	19.7446	21.2683	30.9706	27.5304	4.32237			28.1	190.601	254.533	213.2	184.658	258.17	220.232	15.5063
		28.2	37.8136	19.5847	21.0568	30.6608	27.279	4.28497			28.2	191.078	255.078	213.866	185.011	258.573	220.721	15.5147
		28.3	37.4327	19.3834	20.8657	30.4027	27.0211	4.24322			28.3	191.678	255.538	214.262	185.259	258.961	221.14	15.5184
		28.4	37.0702	19.2261	20.6415	30.0475	26.7463	4.19625			28.4	192.134	256.029	214.701	185.673	259.46	221.6	15.5326
		28.5	36.7232	19.0532	20.4351	29.9608	26.5431	4.17054			28.5	192.634	256.499	215.114	185.928	259.945	222.024	15.558
		28.6	36.3215	18.9423	20.2186	29.5953	26.2694	4.10697			28.6	193.179	256.934	215.533	186.404	260.307	222.472	15.5343
		28.7	35.9603	18.7823	19.974	29.2917	26.0021	4.06663			28.7	193.658	257.437	216.055	186.57	260.679	222.88	15.5593
		28.8	35.6512	18.6482	19.8568	29.0584	25.8036	4.02215			28.8	194.092	257.836	216.494	186.964	261.082	223.294	15.5563
		28.9	35.3003	18.4702	19.6249	28.7961	25.5479	3.98786			28.9	194.592	258.339	216.905	187.195	261.454	223.697	15.5745
		29	34.9521	18.3051	19.4058	28.5628	25.3064	3.95263			29	195.071	258.724	217.238	187.61	261.85	224.098	15.5648
		29.1	34.5791	18.1348	19.1892	28.2613	25.0411	3.90816			29.1	195.534	259.131	217.662	187.827	262.237	224.478	15.579
		29.2	34.317	18.0445	18.9879	28.0321	24.8454	3.87758			29.2	196.002	259.63	218.153	188.089	262.617	224.898	15.5955
		29.3	33.9244	17.8665	18.8478	27.8277	24.6166	3.82741			29.3	196.471	259.969	218.538	188.371	262.963	225.262	15.5902
		29.4	33.6388	17.6421	18.6108	27.5179	24.3524	3.81064			29.4	196.904	260.367	218.934	188.643	263.315	225.632	15.5963
		29.5	33.2984	17.5827	18.4682	27.3114	24.1652	3.75387			29.5	197.335	260.779	219.298	188.959	263.596	225.993	15.5913
		29.6	32.9697	17.3867	18.2949	27.0616	23.9282	3.72035			29.6	197.706	261.101	219.64	189.179	263.971	226.319	15.6047
		29.7	32.6671	17.348	18.0885	26.7931	23.7242	3.67209			29.7	198.147	261.442	219.978	189.414	264.279	226.652	15.6043
		29.8	32.4141	17.0771	17.9	26.5907	23.4955	3.67001			29.8	198.564	261.82	220.475	189.733	264.612	227.041	15.5999
		29.9	31.9694	16.9326	17.7471	26.378	23.2568	3.60558			29.9	198.962	262.178	220.693	189.889	264.922	227.329	15.6174
		30	31.7411	16.8372	17.5687	26.124	23.0678	3.57803			30	199.315	262.501	221.089	190.131	265.17	227.641	15.6141
		30.1	31.3877	16.7366	17.5076	25.8866	22.8796	3.51218			30.1	199.729	262.811	221.37	190.416	265.452	227.955	15.6048
		30.2	31.1151	16.5586	17.2273	25.6925	22.6484	3.50506			30.2	200.141	263.15	221.709	190.545	265.793	228.267	15.6238
		30.3	30.7565	16.4502	17.0337	25.4405	22.4202	3.45532			30.3	200.459	263.405	222.042	190.8	266.002	228.541	15.611
		30.4	30.5282	16.2671	16.9343	25.2526	22.2456	3.43507			30.4	201.681	263.277	222.039	191.602	266.831	229.086	15.4912
		30.5	30.1852	16.1071	16.7356	25.0028	22.0077	3.39674			30.5	201.074	263.955	222.613	191.092	266.501	229.047	15.6298
		30.6	29.9622	15.991	16.5929	24.7632	21.8273	3.36968			30.6	201.562	264.162	222.808	191.405	266.764	229.34	15.5989
		30.7	29.6335	15.8543	16.4808	24.5691	21.6344	3.32375			30.7	201.859	264.407	223.037	191.564	267.02	229.578	15.6063
		30.8	29.3583	15.715	16.2439	24.2759	21.3983	3.29787			30.8	202.252	264.741	223.341	191.761	267.144	229.848	15.5933
		30.9	28.9984	15.6582	16.1954	24.2098	21.2655	3.2354			30.9	202.511	264.996	223.654	191.856	267.364	230.076	15.6071
		31	28.834	15.4776	16.0145	23.9104	21.0591	3.22981			31	202.829	265.199	223.91	192.043	267.674	230.331	15.6107
		31.1	28.4871	15.3641	15.8922	23.7245	20.867	3.17886			31.1	203.056	265.431	224.194	192.22	267.71	230.522	15.5933
		31.2	28.2824	15.1758	15.6731	23.4829	20.6536	3.17562			31.2	203.372	265.659	224.521	192.21	267.886	230.73	15.6067
		31.3	27.9863	15.119	15.6349	23.262	20.5006	3.11311			31.3	203.649	265.871	224.676	192.407	268.144	230.95	15.6096
		31.4	27.6772	14.9101	15.4183	23.103	20.2771	3.09785			31.4	203.962	266.053	224.997	192.546	268.253	231.162	15.5919
		31.5	27.4059	14.8869	15.319	22.9109	20.1307	3.04562			31.5	204.173	266.289	225.144	192.638	268.39	231.327	15.6019
		31.6	27.1816	14.6985	15.1788	22.721	19.945	3.032			31.6	204.398	266.38	225.416	192.845	268.557	231.52	15.5814
		31.7	26.9195	14.5618	14.9954	22.4876	19.7411	3.00581			31.7	204.657	266.604	225.637	192.971	268.687	231.711	15.5794
		31.8	26.613	14.5051	14.8807	22.3183	19.5793	2.95521			31.8	204.872	266.847	225.893	193.117	268.88	231.922	15.5878
		31.9	26.3991	14.3761	14.7584	22.0746	19.402	2.92866			31.9	205.178	267.026	226.157	193.297	269.085	232.148	15.578
		32	26.1434	14.2419	14.6616	21.8867	19.2334	2.89547			32	205.389	267.314	226.432	193.518	269.224	232.375	15.5758
		32.1	25.8904	14.1981	14.4756	21.6926	19.0642	2.86124			32.1	205.642	267.518	226.719	193.643	269.405	232.585	15.5769
		32.2	25.6439	14.0097	14.4195	21.4964	18.8924	2.83154			32.2	205.835	267.827	227	193.786	269.607	232.811	15.5956
		32.3	25.4157	13.9401	14.259	21.3085	18.7308	2.80298			32.3	206.12	268.015	227.27	194.075	269.818	233.06	15.5758
		32.4	25.1692	13.7182	14.0679	21.1557	18.5278	2.79935			32.4	205.748	268.619	227.772	193.99	269.725	233.171	15.6671
		32.5	24.8666	13.6511	13.9507	20.9389	18.3518	2.74775			32.5	206.666	268.659	227.947	194.493	270.203	233.594	15.5816
		32.6	24.6475	13.5634	13.8819	20.7014	18.1986	2.70756			32.6	206.767	269.019	228.32	194.696	270.47	233.854	15.6124
		32.7	24.4441	13.4757	13.7291	20.5878	18.0592	2.69132			32.7	207.081	269.32	228.619	194.934	270.679	234.127	15.6084
		32.8	24.1728	13.3313	13.6322	20.402	17.8846	2.65666			32.8	207.317	269.558	229.052	195.179	270.878	234.397	15.5999
		32.9	23.9758	13.2332	13.5329	20.2327	17.7436	2.6317			32.9	207.569	269.978	229.282	195.403	271.11	234.668	15.6204
		33	23.7385	13.0913	13.3571	20.0014	17.5471	2.61035			33	207.909	270.239	229.643	195.733	271.327	234.97	15.5981
		33.1	23.5311	13.0243	13.2806	19.9147	17.4377	2.58238			33.1	208.131	270.626	229.939	195.974	271.65	235.264	15.6248
		33.2	23.295	12.8566	13.2475	19.6751	17.2686	2.54533			33.2	208.506	270.922	230.26	196.327	271.973	235.598	15.6135
		33.3	23.0825	12.7792	13.0131	19.5244	17.0998	2.53376			33.3	208.785	271.322	230.587	196.548	272.229	235.894	15.631
		33.4	22.8633	12.6399	12.9545	19.3571	16.9537	2.50504			33.4	209.08	271.668	230.949	196.803	272.376	236.175	15.6236
		33.5	22.6521	12.4928	12.8144	19.196	16.7888	2.49039			33.5	209.404	272.091	231.328	197.102	272.751	236.535	15.643
		33.6	22.4486	12.4567	12.6946	18.8884	16.6221	2.44711			33.6	209.696	272.407	231.615	197.373	272.947	236.808	15.6373
		33.7	22.1434	12.3974	12.5443	18.8078	16.4732	2.40919			33.7	210.074	272.788	231.994	197.611	273.247	237.143	15.6462
		33.8	22.0195	12.2813	12.5341	18.7046	16.3849	2.39441			33.8	210.416	273.102	232.326	197.954	273.511	237.462	15.634
		33.9	21.8095	12.1549	12.3455	18.463	16.1932	2.37711			33.9	210.707	273.557	232.648	198.219	273.792	237.785	15.6544
		34	21.6217	12.0233	12.2971	18.3143	16.0641	2.35352			34	211.076	273.889	232.972	198.376	274.082	238.079	15.6687
		34.1	21.3935	12.0207	12.1672	18.1759	15.9393	2.31543			34.1	211.408	274.211	233.331	198.729	274.33	238.402	15.6548
		34.2	21.2292	11.8737	12.1162	18.0107	15.8075	2.29763			34.2	211.715	274.666	233.652	198.977	274.609	238.724	15.6757
		34.3	20.9905	11.7111	11.9124	17.8207	15.6087	2.28602			34.3	212.087	274.984	233.948	199.293	274.88	239.038	15.6665
		34.4	20.8783	11.6518	11.8869	17.6927	15.5274	2.26558			34.4	212.418	275.34	234.341	199.541	275.144	239.357	15.671
		34.5	20.6605	11.528	11.7086	17.4883	15.3463	2.248			34.5	212.808	275.729	234.634	199.819	275.485	239.695	15.6811
		34.6	20.4962	11.3706	11.6755	17.4057	15.237	2.23599			34.6	213.099	276.056	234.984	200.054	275.741	239.987	15.6875
		34.7	20.2667	11.3422	11.5481	17.2178	15.0937	2.1969			34.7	213.434	276.385	235.285	200.387	275.945	240.287	15.6727
		34.8	20.088	11.2597	11.4207	17.065	14.9583	2.17842			34.8	213.831	276.738	235.647	200.57	276.208	240.599	15.6803
		34.9	19.8806	11.2029	11.3646	16.9493	14.8494	2.14405			34.9	214.168	277.079	235.876	200.903	276.474	240.9	15.675
		35	19.7215	11.0533	11.2143	16.749	14.6845	2.13817			35	214.446	277.451	236.298	201.107	276.72	241.204	15.6892
		35.1	19.5728	10.9785	11.2117	16.6148	14.5945	2.10918			35.1	214.73	277.706	236.608	201.413	276.981	241.487	15.6801
		35.2	19.3524	10.914	11.0818	16.4372	14.4463	2.07828			35.2	215.142	278.118	236.866	201.695	277.312	241.826	15.6899
		35.3	19.2441	10.8134	10.9824	16.3071	14.3368	2.07426			35.3	215.469	278.363	237.248	201.807	277.464	242.07	15.6875
		35.4	19.0342	10.7644	10.8729	16.2101	14.2204	2.04697			35.4	215.821	278.79	237.5	202.123	277.759	242.399	15.6958
		35.5	18.8242	10.6715	10.7429	16.0614	14.075	2.02458			35.5	216.098	278.986	237.828	202.33	278.012	242.651	15.6919
		35.6	18.669	10.5477	10.7021	15.9416	13.9651	2.00746			35.6	216.43	279.409	238.163	202.609	278.252	242.972	15.6989
		35.7	18.4916	10.4496	10.5467	15.7971	13.8213	1.99596			35.7	216.736	279.676	238.37	202.772	278.472	243.205	15.7046
		35.8	18.386	10.4625	10.483	15.6112	13.7357	1.96715			35.8	217.073	280.012	238.752	203.03	278.738	243.521	15.706
		35.9	18.1617	10.3	10.4244	15.4811	13.5918	1.94339			35.9	217.444	280.28	239.027	203.21	279.007	243.794	15.7088
		36	18.0065	10.2304	10.3225	15.3965	13.4889	1.92983			36	217.723	280.551	239.317	203.458	279.237	244.057	15.7061
		36.1	17.8604	10.22	10.2894	15.2499	13.4049	1.89528			36.1	217.984	280.887	239.615	203.675	279.529	244.338	15.7234
		36.2	17.7678	10.0369	10.1798	15.097	13.2704	1.90548			36.2	218.328	281.106	239.859	203.893	279.699	244.577	15.7074
		36.3	17.5578	10.0549	10.111	15.0227	13.1866	1.86515			36.3	218.595	281.407	240.184	204.015	279.981	244.836	15.7309
		36.4	17.4626	9.83048	10.0346	14.9112	13.0597	1.87955			36.4	218.884	281.638	240.551	204.222	280.164	245.092	15.7219
		36.5	17.2239	9.8434	9.95307	14.7253	12.9364	1.82689			36.5	219.205	281.869	240.697	204.443	280.42	245.327	15.7196
		36.6	17.0426	9.80728	9.8741	14.5663	12.8226	1.79432			36.6	219.458	282.13	240.961	204.637	280.567	245.551	15.7163
		36.7	16.9722	9.637	9.77472	14.5147	12.7247	1.81388			36.7	219.781	282.39	241.277	204.749	280.89	245.818	15.7366
		36.8	16.8366	9.67569	9.73395	14.3454	12.6479	1.77368			36.8	220.026	282.618	241.57	204.942	281.053	246.042	15.7315
		36.9	16.6475	9.54154	9.57089	14.2318	12.4979	1.76854			36.9	220.281	282.838	241.779	205.099	281.319	246.263	15.7422
		37	16.6018	9.47962	9.53522	14.0955	12.428	1.76216			37	220.53	283.089	242.037	205.241	281.43	246.466	15.7408
		37.1	16.4114	9.34032	9.48936	14.0274	12.3171	1.74513			37.1	220.807	283.308	242.267	205.428	281.738	246.71	15.75
		37.2	16.2027	9.28615	9.41801	13.8498	12.1892	1.70717			37.2	221.047	283.457	242.416	205.483	281.908	246.862	15.7573
		37.3	16.0906	9.23713	9.29062	13.7817	12.1	1.70395			37.3	221.322	283.74	242.715	205.591	282.149	247.103	15.7759
		37.4	15.9641	9.1907	9.24475	13.5793	11.9947	1.67559			37.4	221.527	283.878	242.91	205.734	282.267	247.263	15.7669
		37.5	15.7345	9.09783	9.17852	13.571	11.8955	1.65213			37.5	221.758	284.047	243.131	205.89	282.516	247.468	15.7716
		37.6	15.6289	9.0256	9.07659	13.3955	11.7816	1.6411			37.6	221.996	284.229	243.332	206.016	282.655	247.646	15.7696
		37.7	15.5689	8.94563	9.02818	13.2592	11.7005	1.63617			37.7	222.165	284.403	243.538	206.087	282.841	247.807	15.7843
		37.8	15.3511	8.9869	8.91099	13.1745	11.6059	1.5971			37.8	222.428	284.521	243.791	206.176	282.975	247.978	15.7765
		37.9	15.3328	8.83726	8.92373	12.9598	11.5134	1.59552			37.9	222.62	284.716	243.943	206.288	283.221	248.157	15.7939
		38	15.1163	8.75988	8.76831	12.9288	11.3933	1.5823			38	222.824	284.849	244.221	206.413	283.368	248.335	15.7888
		38.1	15.0133	8.75471	8.75556	12.8565	11.345	1.55873			38.1	221.924	285.602	244.827	205.734	282.782	248.174	15.9687
		38.2	14.9455	8.61024	8.64602	12.6831	11.2212	1.56673			38.2	223.224	285.139	244.537	206.536	283.686	248.624	15.805
		38.3	14.7251	8.6154	8.60779	12.5798	11.132	1.51963			38.3	223.364	285.319	244.795	206.498	283.761	248.747	15.8246
		38.4	14.6025	8.47095	8.52624	12.4931	11.0232	1.51988			38.4	223.507	285.371	244.898	206.607	283.934	248.864	15.8225
		38.5	14.4877	8.45289	8.48038	12.3362	10.9393	1.49362			38.5	223.708	285.478	245.085	206.678	284.094	249.009	15.8247
		38.6	14.3403	8.33421	8.44471	12.2928	10.853	1.48263			38.6	223.853	285.561	245.151	206.709	284.285	249.112	15.8389
		38.7	14.1903	8.30583	8.26893	12.142	10.7268	1.46916			38.7	223.971	285.577	245.329	206.729	284.366	249.194	15.8353
		38.8	14.1186	8.22844	8.21796	12.0842	10.6623	1.46817			38.8	224.183	285.658	245.447	206.773	284.469	249.306	15.832
		38.9	13.9673	8.21813	8.20777	11.9665	10.5899	1.43183			38.9	224.294	285.7	245.461	206.913	284.683	249.41	15.8329
		39	13.833	8.07623	8.15426	11.8942	10.4894	1.42681			39	224.364	285.81	245.699	206.804	284.764	249.488	15.8606
		39.1	13.7808	8.0298	8.0982	11.7435	10.4131	1.41863			39.1	224.554	285.883	245.785	206.879	284.911	249.602	15.8592
		39.2	13.6086	7.96789	7.98355	11.6857	10.3114	1.4045			39.2	224.638	285.946	245.897	206.886	284.975	249.668	15.8647
		39.3	13.5004	7.87242	7.91476	11.5762	10.216	1.39719			39.3	224.735	285.961	246.02	206.984	285.107	249.762	15.8586
		39.4	13.3765	7.90339	7.93769	11.5246	10.1855	1.36126			39.4	224.855	286.07	246.193	206.957	285.177	249.85	15.8711
		39.5	13.3087	7.76409	7.88418	11.3801	10.0843	1.36319			39.5	224.958	286.109	246.224	207.018	285.311	249.924	15.8738
		39.6	13.1483	7.75634	7.78482	11.2624	9.98795	1.33684			39.6	225.053	286.318	246.394	207.117	285.446	250.065	15.8897
		39.7	13.1117	7.69186	7.75679	11.1756	9.934	1.33564			39.7	225.171	286.235	246.537	207.185	285.552	250.136	15.872
		39.8	12.9513	7.63252	7.64213	11.1116	9.8344	1.3229			39.8	225.277	286.388	246.775	207.236	285.621	250.26	15.8793
		39.9	12.86	7.53964	7.60137	11.0435	9.76113	1.31805			39.9	225.363	286.521	246.827	207.324	285.838	250.375	15.8993
		40	12.6553	7.51386	7.58864	10.9444	9.67553	1.2753			40	225.431	286.723	247.099	207.368	285.89	250.502	15.9137
		40.1	12.6409	7.43387	7.48416	10.839	9.5995	1.28942			40.1	226.365	286.39	247.062	208.017	286.518	250.87	15.7858
		40.2	12.5327	7.46999	7.54022	10.7895	9.58309	1.25146			40.2	225.575	286.969	247.395	207.636	286.167	250.748	15.9216
		40.3	12.4348	7.33584	7.38735	10.6532	9.45281	1.26099			40.3	225.811	286.981	247.541	207.752	286.306	250.878	15.9027
		40.4	12.2979	7.341	7.35677	10.583	9.39466	1.23192			40.4	225.862	287.243	247.728	207.881	286.474	251.038	15.9276
		40.5	12.191	7.21201	7.28544	10.5293	9.30442	1.23447			40.5	225.98	287.389	247.998	208.109	286.621	251.219	15.9177
		40.6	12.0658	7.24297	7.30326	10.3455	9.23938	1.18835			40.6	226.125	287.63	248.21	208.241	286.732	251.388	15.9259
		40.7	12.024	7.10883	7.16823	10.3145	9.15391	1.21484			40.7	226.221	287.858	248.431	208.326	286.911	251.549	15.9503
		40.8	11.9523	7.06495	7.15549	10.2464	9.10478	1.20319			40.8	226.379	288.023	248.718	208.496	287.11	251.745	15.9528
		40.9	11.7853	7.07528	7.08414	10.139	9.02095	1.17007			40.9	226.483	288.314	248.953	208.622	287.221	251.919	15.9707
		41	11.7658	7.03659	7.11217	10.1308	9.01133	1.16714			41	226.638	288.562	249.257	208.798	287.337	252.119	15.9727
		41.1	11.5819	6.95919	6.98988	9.94698	8.86948	1.14383			41.1	226.808	288.76	249.493	208.995	287.502	252.312	15.9712
		41.2	11.5115	6.87922	6.97205	9.8685	8.80781	1.1374			41.2	226.955	288.928	249.725	209.199	287.714	252.504	15.9723
		41.3	11.4241	6.91276	6.83954	9.88917	8.76639	1.13551			41.3	227.14	289.23	249.92	209.291	287.856	252.687	15.9935
		41.4	11.3106	6.82246	6.90578	9.75287	8.69794	1.1056			41.4	227.333	289.434	250.173	209.464	287.988	252.878	15.9901
		41.5	11.205	6.76056	6.837	9.67854	8.62027	1.09694			41.5	227.481	289.77	250.428	209.685	288.164	253.106	16.0038
		41.6	11.1019	6.73732	6.74527	9.5856	8.54254	1.08503			41.6	227.7	289.963	250.623	209.851	288.332	253.294	16.0026
		41.7	11.0759	6.66768	6.70706	9.58149	8.50802	1.09455			41.7	227.888	290.254	250.91	210.028	288.487	253.514	16.0116
		41.8	10.9585	6.70378	6.71471	9.46171	8.45967	1.05578			41.8	228.083	290.484	251.12	210.178	288.694	253.712	16.023
		41.9	10.8267	6.6264	6.64845	9.43073	8.38308	1.04737			41.9	228.289	290.724	251.41	210.405	288.846	253.935	16.0175
		42	10.7994	6.56191	6.55673	9.31509	8.30827	1.05423			42	228.492	290.928	251.659	210.653	288.957	254.138	16.001
		42.1	10.6963	6.51548	6.52105	9.26347	8.24909	1.04121			42.1	228.696	291.287	251.898	210.775	289.19	254.369	16.0329
		42.2	10.635	6.38648	6.48538	9.15403	8.16523	1.04337			42.2	228.891	291.397	252.035	210.901	289.27	254.499	16.0204
		42.3	10.5842	6.40455	6.49558	9.10447	8.14719	1.0255			42.3	229.123	291.71	252.311	211.129	289.495	254.753	16.0292
		42.4	10.4016	6.36585	6.36818	9.02186	8.03937	1.00577			42.4	229.352	291.938	252.52	211.278	289.699	254.957	16.0374
		42.5	10.3533	6.35294	6.33761	8.9909	8.0087	0.999837			42.5	229.607	292.153	252.747	211.479	289.774	255.152	16.021
		42.6	10.262	6.18267	6.28664	8.92069	7.91301	1.00716			42.6	229.749	292.398	253.031	211.625	289.916	255.344	16.0312
		42.7	10.1655	6.30392	6.30958	8.79885	7.89447	0.958179			42.7	230.033	292.622	253.192	211.825	290.122	255.559	16.0283
		42.8	10.1003	6.13109	6.21532	8.74723	7.79849	0.978312			42.8	230.204	292.872	253.416	211.964	290.306	255.752	16.0427
		42.9	10.0025	6.14398	6.28409	8.74929	7.79496	0.948349			42.9	230.459	293.008	253.565	212.121	290.412	255.913	16.0272
		43	9.98293	6.08981	6.12104	8.60886	7.70066	0.962793			43	230.667	293.334	253.852	212.229	290.603	256.137	16.052
		43.1	9.89294	6.02789	6.16179	8.59029	7.66823	0.946906			43.1	230.872	293.434	253.992	212.416	290.768	256.297	16.0385
		43.2	9.76643	5.96597	6.05989	8.53865	7.58274	0.940537			43.2	231.062	293.704	254.236	212.576	290.931	256.502	16.0487
		43.3	9.69861	5.97371	6.03185	8.49736	7.55039	0.92662			43.3	231.302	293.878	254.408	212.715	291.094	256.679	16.047
		43.4	9.63079	5.8989	6.0344	8.37552	7.4849	0.913663			43.4	231.534	294.049	254.632	212.885	291.169	256.854	16.0317
		43.5	9.57602	5.96855	5.93758	8.28673	7.44222	0.899162			43.5	231.726	294.23	254.802	212.987	291.332	257.015	16.0397
		43.6	9.51863	5.81377	5.90446	8.3239	7.39019	0.917177			43.6	231.909	294.518	254.948	213.143	291.541	257.212	16.0587
		43.7	9.38169	5.81635	5.88153	8.18762	7.3168	0.881923			43.7	232.1	294.599	255.212	213.249	291.639	257.36	16.0473
		43.8	9.33735	5.76991	5.82548	8.14218	7.26873	0.88372			43.8	232.389	294.781	255.367	213.371	291.755	257.533	16.0403
		43.9	9.28518	5.72864	5.8102	8.10914	7.23329	0.878754			43.9	232.461	294.995	255.508	213.52	291.879	257.673	16.0512
		44	9.16128	5.69252	5.75923	8.01828	7.15783	0.859137			44	232.767	295.147	255.651	213.585	291.97	257.824	16.0447
		44.1	9.1665	5.68736	5.70827	7.9997	7.14046	0.866303			44.1	232.926	295.269	255.869	213.721	292.161	257.989	16.0466
		44.2	9.09084	5.59449	5.69045	7.94601	7.08045	0.862702			44.2	233.087	295.473	255.995	213.806	292.21	258.114	16.0504
		44.3	9.0465	5.58673	5.60381	7.8118	7.01221	0.856021			44.3	233.282	295.646	256.153	213.989	292.376	258.289	16.0466
		44.4	8.95652	5.58159	5.57579	7.84689	6.9902	0.845827			44.4	233.456	295.694	256.328	214.044	292.489	258.402	16.042
		44.5	8.90565	5.53258	5.60381	7.76223	6.95107	0.831943			44.5	233.673	295.885	256.455	214.183	292.559	258.551	16.0346
		44.6	8.79741	5.45518	5.58088	7.70441	6.88447	0.820257			44.6	233.766	295.985	256.587	214.224	292.631	258.639	16.0404
		44.7	8.78306	5.50678	5.48915	7.70441	6.87085	0.822656			44.7	233.92	296.109	256.773	214.329	292.784	258.783	16.0432
		44.8	8.7035	5.41905	5.51463	7.63214	6.81733	0.810028			44.8	234.13	296.196	256.853	214.461	292.81	258.89	16.0209
		44.9	8.6096	5.38553	5.48406	7.55573	6.75873	0.794323			44.9	234.287	296.339	257.06	214.516	293.001	259.041	16.0368
		45	8.59917	5.41133	5.44838	7.5165	6.74385	0.790202			45	234.419	296.412	257.158	214.427	293.016	259.086	16.0485
		45.1	8.47657	5.2617	5.41782	7.5165	6.66815	0.792229			45.1	234.574	296.544	257.229	214.638	293.096	259.217	16.0306
		45.2	8.52613	5.26685	5.30316	7.46694	6.64077	0.812095			45.2	234.698	296.624	257.33	214.682	293.138	259.294	16.028
		45.3	8.39049	5.29008	5.3057	7.3451	6.58284	0.771956			45.3	234.771	296.694	257.476	214.774	293.202	259.384	16.0238
		45.4	8.35006	5.1456	5.32864	7.37195	6.54906	0.784213			45.4	235.016	296.771	257.628	214.774	293.254	259.489	16.0185
		45.5	8.29397	5.19205	5.28277	7.31619	6.52124	0.767848			45.5	235.106	296.79	257.628	214.872	293.36	259.551	16.0112
		45.6	8.27572	5.07594	5.27769	7.23773	6.46677	0.775403			45.6	235.216	296.956	257.798	214.876	293.396	259.648	16.0246
		45.7	8.11921	5.17656	5.22672	7.20675	6.43231	0.734606			45.7	235.2	297.002	257.884	214.821	293.311	259.644	16.0293
		45.8	8.19616	5.06563	5.21908	7.21914	6.425	0.76756			45.8	236.562	296.404	257.479	215.722	294.272	260.088	15.8368
		45.9	8.10616	5.04241	5.15284	7.08698	6.3471	0.751122			45.9	235.506	296.993	257.907	215.005	293.456	259.773	15.9944
		46	8.03053	5.04756	5.12735	7.0271	6.30813	0.734101			46	235.63	297	258.01	214.995	293.538	259.835	15.9954
		46.1	7.9614	5.05274	5.17322	7.00231	6.29742	0.711733			46.1	235.71	297.025	258.047	215.005	293.551	259.868	15.9919
		46.2	7.9288	5.02693	5.13755	7.06014	6.28835	0.718926			46.2	235.842	297.133	258.191	214.978	293.6	259.949	16.0027
		46.3	7.8388	4.95728	5.08149	6.9796	6.21429	0.712277			46.3	235.871	297.19	258.239	215.046	293.518	259.973	15.9886
		46.4	7.86228	4.92632	5.10443	6.93624	6.20732	0.714582			46.4	235.985	297.138	258.323	214.988	293.551	259.997	15.9852
		46.5	7.70839	4.92116	4.97703	6.85364	6.11505	0.695504			46.5	236.037	297.223	258.409	214.995	293.518	260.036	15.9863
		46.6	7.71099	4.86955	5.01016	6.74832	6.08475	0.690195			46.6	236.091	297.248	258.446	214.974	293.497	260.051	15.9856
		46.7	7.69665	4.84635	4.99231	6.77309	6.0771	0.695154			46.7	236.166	297.237	258.498	214.872	293.541	260.063	15.9974
		46.8	7.58318	4.83602	4.91842	6.75245	6.02252	0.682841			46.8	236.165	297.211	258.512	214.991	293.456	260.067	15.9687
		46.9	7.4958	4.8386	4.9439	6.68844	5.99169	0.656715			46.9	236.25	297.173	258.595	214.906	293.505	260.086	15.9747
		47	7.51405	4.75347	4.88276	6.66571	5.954	0.678792			47	236.269	297.2	258.656	214.92	293.476	260.104	15.9713
		47.1	7.42015	4.75346	4.87002	6.56247	5.90152	0.653523			47.1	236.3	297.202	258.679	214.866	293.456	260.1	15.9746
		47.2	7.41886	4.73541	4.79868	6.56247	5.87885	0.665405			47.2	236.331	297.196	258.756	214.852	293.443	260.116	15.9719
		47.3	7.37451	4.71995	4.83688	6.53976	5.86777	0.652051			47.3	236.367	297.24	258.859	214.92	293.438	260.165	15.9638
		47.4	7.25973	4.66834	4.78594	6.45302	5.79176	0.636786			47.4	236.401	297.252	258.902	214.913	293.45	260.184	15.9647
		47.5	7.26234	4.59611	4.75537	6.40554	5.75484	0.647919			47.5	236.368	297.306	258.937	214.971	293.453	260.207	15.9653
		47.6	7.22712	4.61158	4.76301	6.42205	5.75594	0.639242			47.6	236.413	297.279	259.057	214.998	293.469	260.243	15.9562
		47.7	7.21278	4.5084	4.72734	6.38075	5.70732	0.65305			47.7	236.572	297.355	259.141	215.134	293.6	260.36	15.9473
		47.8	7.0654	4.59869	4.72734	6.34151	5.68323	0.607843			47.8	235.575	297.863	259.614	214.502	292.962	260.103	16.1041
		47.9	7.04324	4.52131	4.65344	6.2899	5.62697	0.620183			47.9	236.556	297.514	259.557	215.256	293.618	260.5	15.95
		48	7.01323	4.51614	4.656	6.27957	5.61623	0.613994			48	236.563	297.635	259.528	215.226	293.634	260.517	15.9695
		48.1	7.04584	4.44649	4.65599	6.22175	5.59252	0.625735			48.1	236.618	297.686	259.729	215.402	293.647	260.616	15.9471
		48.2	6.90369	4.43617	4.65855	6.166	5.5411	0.594903			48.2	236.657	297.76	259.821	215.362	293.784	260.677	15.9725
		48.3	6.9076	4.41036	4.61777	6.0896	5.50634	0.598224			48.3	236.739	297.872	259.89	215.572	293.786	260.772	15.9495
		48.4	6.875	4.42326	4.64071	6.1309	5.51747	0.590563			48.4	236.83	297.894	260.039	215.684	293.918	260.873	15.9426
		48.5	6.82282	4.39489	4.5286	6.08752	5.45846	0.595332			48.5	236.864	298.073	260.199	215.742	294.06	260.988	15.9669
		48.6	6.74457	4.32781	4.60759	6.04209	5.43052	0.576911			48.6	237.063	298.121	260.274	215.926	294.091	261.095	15.9345
		48.7	6.74196	4.34329	4.54388	5.95538	5.39613	0.574371			48.7	237.097	298.303	260.406	216.112	294.195	261.223	15.937
		48.8	6.66631	4.31233	4.52605	6.00286	5.37689	0.570939			48.8	237.143	298.448	260.613	216.16	294.342	261.341	15.9584
		48.9	6.65588	4.33811	4.53114	5.94092	5.36651	0.558859			48.9	237.263	298.538	260.765	216.343	294.399	261.462	15.9394
		49	6.64805	4.30459	4.4751	5.91201	5.33494	0.567027			49	237.439	298.699	260.882	216.466	294.512	261.6	15.9389
		49.1	6.55154	4.2788	4.53114	5.84799	5.30237	0.54011			49.1	237.468	298.903	261.026	216.619	294.621	261.727	15.9496
		49.2	6.56198	4.22977	4.43431	5.84386	5.26748	0.56117			49.2	237.7	298.989	261.167	216.704	294.799	261.872	15.9481
		49.3	6.41069	4.21945	4.49548	5.77985	5.22637	0.52098			49.3	237.776	299.173	261.33	216.894	294.866	262.008	15.9435
		49.4	6.39633	4.20398	4.4012	5.7819	5.19585	0.532281			49.4	237.883	299.339	261.488	217.03	295.001	262.148	15.9489
		49.5	6.43807	4.17045	4.48784	5.75094	5.21182	0.532522			49.5	238.047	299.486	261.652	217.132	295.164	262.296	15.9556
		49.6	6.39634	4.18851	4.37063	5.71583	5.16783	0.532614			49.6	238.249	299.67	261.798	217.342	295.161	262.444	15.9313
		49.7	6.36113	4.21429	4.37317	5.71583	5.16611	0.521612			49.7	238.357	299.744	261.835	217.465	295.425	262.565	15.9415
		49.8	6.35461	4.11886	4.39356	5.64975	5.12919	0.527142			49.8	238.473	300.008	262.096	217.577	295.453	262.721	15.95
		49.9	6.26983	4.0724	4.37573	5.64768	5.09141	0.520311			49.9	238.624	300.19	262.237	217.692	295.642	262.877	15.9626
		50	6.18115	4.10337	4.29419	5.61672	5.04886	0.505637			50	238.793	300.411	262.369	217.92	295.717	263.042	15.9508
		50.1	6.15115	4.14981	4.36044	5.5465	5.05197	0.478268			50.1	238.966	300.517	262.535	217.947	295.828	263.159	15.9573
		50.2	6.21115	4.02855	4.28654	5.56922	5.02386	0.519724			50.2	239.085	300.699	262.665	218.093	295.89	263.286	15.955
		50.3	6.07942	4.03889	4.34004	5.50934	4.99192	0.481629			50.3	239.222	300.82	262.748	218.273	296.099	263.432	15.9544
		50.4	6.08724	4.08531	4.2305	5.52999	4.98326	0.490803			50.4	239.398	301.04	263.017	218.365	296.135	263.591	15.9571
		50.5	6.05724	4.03887	4.18463	5.45564	4.9341	0.491308			50.5	239.564	301.164	263.175	218.528	296.282	263.743	15.9507
		50.6	5.98942	3.9847	4.26107	5.44945	4.92116	0.477227			50.6	239.728	301.301	263.207	218.524	296.435	263.839	15.9703
		50.7	5.95682	3.98986	4.23048	5.43912	4.90407	0.47294			50.7	239.899	301.469	263.385	218.725	296.468	263.989	15.9517
		50.8	5.99855	3.97438	4.22031	5.40608	4.89983	0.481463			50.8	239.973	301.62	263.525	218.817	296.636	264.114	15.9678
		50.9	5.92552	3.88409	4.16679	5.3586	4.83375	0.484263			50.9	240.176	301.766	263.591	218.986	296.786	264.261	15.9605
		51	5.86161	3.85054	4.17444	5.32556	4.80304	0.47399			51	240.241	301.888	263.784	218.976	296.76	264.33	15.9684
		51.1	5.83031	3.93053	4.14388	5.3173	4.8055	0.457848			51.1	240.45	302.089	263.876	219.228	296.965	264.521	15.9613
		51.2	5.84596	3.90215	4.13112	5.25741	4.78416	0.461501			51.2	240.616	302.149	263.964	219.201	297.099	264.606	15.9732
		51.3	5.76119	3.94601	4.07761	5.28424	4.76726	0.447701			51.3	240.727	302.289	264.091	219.279	297.187	264.714	15.9789
		51.4	5.72336	3.86603	4.12858	5.15209	4.71751	0.435168			51.4	240.835	302.429	264.315	219.408	297.339	264.865	15.9839
		51.5	5.76641	3.83507	4.08271	5.25327	4.73436	0.462581			51.5	241.059	302.561	264.346	219.455	297.424	264.969	15.9846
		51.6	5.65686	3.82218	4.1082	5.13556	4.6807	0.430563			51.6	241.178	302.651	264.435	219.54	297.445	265.05	15.976
		51.7	5.68163	3.82218	4.03176	5.18926	4.68121	0.448949			51.7	241.208	302.768	264.573	219.659	297.603	265.162	15.9864
		51.8	5.65034	3.83507	4.01648	5.12524	4.65678	0.437017			51.8	241.432	302.883	264.619	219.713	297.698	265.269	15.985
		51.9	5.60469	3.7422	4.03176	5.12319	4.62546	0.441518			51.9	241.57	302.945	264.794	219.781	297.789	265.376	15.9812
		52	5.59557	3.70609	4.03175	5.12111	4.61363	0.445716			52	241.63	303.016	264.831	219.775	297.882	265.427	15.9954
		52.1	5.5199	3.81185	4.04194	4.99722	4.59273	0.401704			52.1	241.774	303.17	264.932	219.873	298.008	265.551	16.0014
		52.2	5.50165	3.77058	3.97571	5.07982	4.58194	0.420275			52.2	241.833	303.223	265.049	219.958	298.073	265.627	15.9973
		52.3	5.49513	3.66223	3.95531	5.01373	4.5316	0.432891			52.3	241.984	303.275	265.132	219.975	298.192	265.712	16.0019
		52.4	5.45209	3.70351	3.99863	4.96625	4.53012	0.40886			52.4	242.097	303.398	265.204	219.992	298.267	265.791	16.0129
		52.5	5.40905	3.66223	4.00118	4.9745	4.51174	0.408417			52.5	242.211	303.361	265.224	220.026	298.357	265.836	16.0044
		52.6	5.36992	3.75509	3.98589	4.97244	4.52084	0.38702			52.6	242.271	303.497	265.373	220.057	298.414	265.922	16.017
		52.7	5.3647	3.69835	3.92984	4.95592	4.4872	0.400275			52.7	242.326	303.532	265.396	220.06	298.523	265.967	16.0276
		52.8	5.31123	3.6777	3.93239	4.91462	4.45899	0.38962			52.8	242.442	303.522	265.505	220.118	298.595	266.036	16.0167
		52.9	5.2669	3.58999	3.86105	4.87332	4.39781	0.400219			52.9	242.511	303.582	265.514	220.108	298.631	266.069	16.0238
		53	5.32167	3.63127	3.91965	4.84441	4.42925	0.394254			53	242.594	303.642	265.626	220.135	298.737	266.147	16.0314
		53.1	5.2382	3.60546	3.9324	4.85679	4.40821	0.38307			53.1	242.676	303.635	265.597	220.138	298.778	266.165	16.0283
		53.2	5.2382	3.6416	3.83812	4.80724	4.38129	0.382743			53.2	242.726	303.723	265.709	220.114	298.879	266.23	16.0484
		53.3	5.23037	3.59515	3.90437	4.81964	4.38738	0.382798			53.3	242.779	303.7	265.706	220.097	298.944	266.245	16.0509
		53.4	5.14038	3.58998	3.83302	4.81551	4.34472	0.374853			53.4	243.136	303.534	265.683	220.264	299.163	266.356	16.0041
		53.5	5.22646	3.52034	3.81773	4.74943	4.32849	0.397652			53.5	241.763	304.262	266.277	219.401	298.298	266	16.2267
		53.6	5.13908	3.55902	3.85849	4.77419	4.3327	0.372896			53.6	242.897	303.785	265.933	220.108	299.047	266.354	16.0609
		53.7	5.17428	3.54097	3.85849	4.71018	4.32098	0.376598			53.7	242.967	303.741	265.967	220.023	299.101	266.36	16.0684
		53.8	5.09734	3.53581	3.82029	4.75149	4.30123	0.371226			53.8	243.013	303.718	266.022	220.04	299.184	266.395	16.0683
		53.9	5.06344	3.54872	3.82027	4.71225	4.28617	0.359001			53.9	243.059	303.71	266.002	219.955	299.225	266.39	16.0806
		54	5.07908	3.50228	3.77442	4.75355	4.27733	0.378948			54	243.085	303.6	265.965	219.961	299.225	266.367	16.065
		54.1	5.03083	3.56419	3.82029	4.704	4.27983	0.349672			54.1	243.121	303.578	265.939	219.907	299.347	266.378	16.0801
		54.2	5.01649	3.45326	3.74639	4.66268	4.21971	0.369972			54.2	243.114	303.51	265.967	219.86	299.321	266.355	16.077
		54.3	5.05039	3.45068	3.76169	4.66267	4.23136	0.374933			54.3	243.172	303.461	265.881	219.86	299.344	266.344	16.0696
		54.4	4.97474	3.48939	3.77187	4.63585	4.21796	0.350852			54.4	243.193	303.371	265.936	219.829	299.344	266.335	16.0621
		54.5	4.95388	3.45584	3.73621	4.65649	4.2006	0.358887			54.5	243.148	303.36	265.924	219.737	299.453	266.325	16.0885
		54.6	4.95909	3.44295	3.75149	4.63997	4.19838	0.35871			54.6	243.126	303.325	265.907	219.663	299.437	266.292	16.0952
		54.7	4.94214	3.42489	3.77696	4.60075	4.18619	0.352417			54.7	243.155	303.296	265.939	219.717	299.515	266.324	16.09
		54.8	4.90954	3.41199	3.73365	4.58422	4.15985	0.351553			54.8	243.177	303.171	265.976	219.629	299.489	266.288	16.0841
		54.9	4.88085	3.45326	3.78717	4.5553	4.16914	0.330912			54.9	243.172	303.195	265.947	219.615	299.473	266.281	16.0877
		55	4.88215	3.42747	3.69798	4.55119	4.13969	0.344353			55	243.135	303.114	266.011	219.52	299.536	266.263	16.1012
		55.1	4.8052	3.26493	3.70563	4.53053	4.07657	0.35746			55.1	243.147	303.052	265.965	219.564	299.541	266.254	16.0874
		55.2	4.8691	3.42746	3.62664	4.49956	4.10569	0.344894			55.2	243.087	303.142	266.036	219.581	299.675	266.304	16.1134
		55.3	4.86258	3.37587	3.70817	4.53672	4.12084	0.34742			55.3	243.138	303.065	266.011	219.469	299.678	266.272	16.1174
		55.4	4.76085	3.3346	3.68525	4.50369	4.0711	0.335931			55.4	242.95	303.227	266.151	219.493	299.543	266.273	16.1321
		55.5	4.84172	3.37071	3.6827	4.46858	4.09093	0.340548			55.5	244.026	302.594	265.856	220.145	300.28	266.58	15.9657
		55.6	4.73738	3.3578	3.65975	4.47271	4.05691	0.326907			55.6	243.087	303.095	266.188	219.632	299.825	266.365	16.116
		55.7	4.68391	3.32427	3.68015	4.40251	4.02271	0.314458			55.7	243.077	303.077	266.177	219.669	299.861	266.372	16.113
		55.8	4.76086	3.34233	3.61643	4.41282	4.03311	0.33224			55.8	243.077	303.188	266.389	219.73	299.931	266.463	16.124
		55.9	4.68521	3.39652	3.61646	4.44173	4.03498	0.312388			55.9	243.054	303.179	266.386	219.792	299.91	266.464	16.1136
		56	4.71781	3.26752	3.62664	4.3674	3.99484	0.332422			56	243.099	303.296	266.527	219.788	300.047	266.551	16.1384
		56.1	4.69434	3.29073	3.61391	4.33229	3.98282	0.321904			56.1	243.118	303.411	266.682	219.955	300.096	266.652	16.1311
		56.2	4.67609	3.31138	3.63429	4.36121	3.99574	0.315627			56.2	243.116	303.556	266.834	219.978	300.107	266.718	16.1454
		56.3	4.66043	3.24946	3.60626	4.33641	3.96314	0.324325			56.3	243.167	303.581	266.909	220.043	300.256	266.791	16.1507
		56.4	4.56001	3.29331	3.56039	4.31578	3.93237	0.301067			56.4	243.2	303.699	267.098	220.175	300.355	266.905	16.1529
		56.5	4.65522	3.30106	3.60624	4.31576	3.96957	0.312101			56.5	243.229	303.84	267.201	220.22	300.411	266.98	16.1664
		56.6	4.61217	3.25462	3.60625	4.30958	3.94565	0.312172			56.6	243.336	303.92	267.342	220.434	300.497	267.106	16.1456
		56.7	4.62652	3.22108	3.57567	4.31578	3.93476	0.324292			56.7	243.338	304.035	267.425	220.468	300.585	267.17	16.1628
		56.8	4.54696	3.21335	3.52216	4.33023	3.90317	0.318574			56.8	243.4	304.186	267.626	220.522	300.621	267.271	16.1715
		56.9	4.55218	3.28816	3.55529	4.28067	3.91907	0.297484			56.9	243.473	304.321	267.758	220.661	300.675	267.378	16.1672
		57	4.54436	3.18755	3.53491	4.26208	3.88223	0.314365			57	243.537	304.46	267.861	220.722	300.809	267.478	16.1834
		57.1	4.59913	3.20044	3.62918	4.21459	3.91084	0.30957			57.1	243.562	304.62	267.999	220.926	300.918	267.605	16.1818
		57.2	4.48045	3.22624	3.50434	4.21458	3.8564	0.294219			57.2	243.702	304.718	268.171	220.943	301.039	267.715	16.1928
		57.3	4.48305	3.18754	3.54511	4.25589	3.8679	0.302218			57.3	243.793	304.905	268.229	221.113	301.039	267.816	16.1831
		57.4	4.49089	3.1798	3.52727	4.23319	3.85779	0.304226			57.4	243.906	305.018	268.433	221.195	301.267	267.964	16.1995
		57.5	4.46219	3.16949	3.44064	4.17329	3.81141	0.303316			57.5	243.945	305.171	268.567	221.314	301.256	268.051	16.196
		57.6	4.48436	3.14884	3.56294	4.18774	3.84597	0.301446			57.6	244.123	305.239	268.705	221.463	301.435	268.193	16.1876
		57.7	4.42437	3.18238	3.48906	4.18362	3.81986	0.290625			57.7	244.186	305.407	268.843	221.626	301.471	268.307	16.1825
		57.8	4.42176	3.16691	3.53747	4.17122	3.82434	0.287483			57.8	244.313	305.523	268.923	221.613	301.559	268.386	16.1974
		57.9	4.44523	3.1566	3.52218	4.16916	3.82329	0.294616			57.9	244.398	305.701	269.038	221.827	301.667	268.526	16.1919
		58	4.36178	3.17464	3.52217	4.10101	3.7899	0.269886			58	244.574	305.844	269.227	221.884	301.781	268.662	16.1989
		58.1	4.42828	3.16176	3.53237	4.16915	3.82289	0.289812			58.1	244.626	305.986	269.202	222.034	301.817	268.733	16.1934
		58.2	4.39176	3.13594	3.50179	4.1547	3.79605	0.289516			58.2	244.773	306.083	269.368	222.047	301.926	268.839	16.203
		58.3	4.40611	3.13595	3.52218	4.09069	3.78873	0.28424			58.3	244.906	306.219	269.48	222.146	301.962	268.943	16.1984
		58.4	4.32916	3.10756	3.49415	4.06384	3.74868	0.275697			58.4	245.029	306.354	269.652	222.258	302.094	269.077	16.2023
		58.5	4.3709	3.14884	3.54001	4.09482	3.78864	0.274458			58.5	245.122	306.437	269.718	222.421	302.199	269.179	16.1923
		58.6	4.32003	3.11016	3.51198	4.10515	3.76183	0.276368			58.6	245.241	306.591	269.83	222.407	302.207	269.255	16.2041
		58.7	4.38785	3.12563	3.47377	4.08036	3.7669	0.285918			58.7	245.347	306.693	269.928	222.584	302.326	269.376	16.1948
		58.8	4.2783	3.13594	3.47122	4.13612	3.7554	0.271242			58.8	245.512	306.808	269.985	222.676	302.362	269.469	16.1864
		58.9	4.29134	3.11273	3.5451	4.037	3.74654	0.261959			58.9	245.6	306.893	270.085	222.696	302.44	269.543	16.1947
		59	4.31742	3.07403	3.52983	4.0432	3.74112	0.275836			59	245.662	307.004	270.215	222.747	302.522	269.63	16.2043
		59.1	4.3422	3.05597	3.4967	4.01221	3.72677	0.283305			59.1	245.792	307.126	270.169	222.791	302.551	269.686	16.2052
		59.2	4.27178	3.16176	3.49415	4.04527	3.74324	0.253433			59.2	245.908	307.185	270.358	222.856	302.579	269.777	16.1972
		59.3	4.29003	3.08951	3.41261	4.05145	3.7109	0.277857			59.3	245.989	307.234	270.43	222.883	302.623	269.832	16.1976
		59.4	4.23265	3.05598	3.45084	4.00396	3.68586	0.266482			59.4	246.117	307.296	270.459	222.988	302.734	269.919	16.1914
		59.5	4.24178	3.12563	3.46103	3.97712	3.70139	0.251217			59.5	246.201	307.418	270.519	223.012	302.758	269.981	16.1983
		59.6	4.23657	3.05341	3.4865	3.97505	3.68788	0.262462			59.6	246.312	307.502	270.582	223.05	302.814	270.052	16.2003
		59.7	4.15048	3.08435	3.44065	4.01428	3.67244	0.249158			59.7	246.38	307.554	270.631	223.033	302.804	270.08	16.2028
		59.8	4.22483	3.04824	3.41771	3.99777	3.67214	0.268559			59.8	246.479	307.574	270.697	223.111	302.848	270.142	16.1911
		59.9	4.1857	3.04825	3.42281	3.91105	3.64195	0.25308			59.9	246.461	307.645	270.745	223.168	302.915	270.187	16.1991
		60	4.22222	3.04825	3.42791	3.92136	3.65493	0.260193			60	246.604	307.655	270.743	223.141	302.907	270.21	16.193
		60.1	4.09309	3.11273	3.3795	3.93788	3.6308	0.23086			60.1	246.724	307.737	270.837	223.196	302.84	270.267	16.1792
		60.2	4.17918	3.03276	3.39478	3.92756	3.63357	0.258539			60.2	246.738	307.746	270.863	223.097	302.964	270.282	16.2061
		60.3	4.16482	3.03534	3.40752	3.89865	3.62659	0.251873			60.3	246.847	307.8	270.903	223.175	302.951	270.335	16.1919
		60.4	4.14136	3.02502	3.37949	3.90278	3.61216	0.25222			60.4	246.898	307.79	270.941	223.148	303.008	270.357	16.1967
		60.5	4.10484	3.03792	3.47121	3.88006	3.62351	0.235161			60.5	246.951	307.873	270.9	223.158	302.938	270.364	16.1939
		60.6	4.19092	3.03792	3.39223	3.86354	3.62115	0.254288			60.6	246.972	307.832	270.941	223.138	302.954	270.367	16.1923
		60.7	4.11787	3.02502	3.44574	3.89865	3.62182	0.243221			60.7	247.078	307.752	271.044	223.1	302.982	270.391	16.1839
		60.8	4.08657	2.95537	3.40752	3.87386	3.58083	0.252138			60.8	247.059	307.807	271.001	223.111	302.923	270.38	16.1841
		60.9	4.14788	3.03535	3.35656	3.8367	3.59412	0.247346			60.9	247.121	307.818	270.923	223.145	302.913	270.384	16.1747
		61	4.03832	2.98632	3.41006	3.83669	3.56785	0.233933			61	247.151	307.804	270.978	223.063	302.92	270.383	16.1837
		61.1	4.09179	3.00438	3.42025	3.81399	3.58261	0.236909			61.1	246.649	308.03	271.288	222.649	302.546	270.232	16.2701
		61.2	4.10875	3.04824	3.35656	3.85528	3.59221	0.239349			61.2	248.155	307.285	270.562	223.692	303.52	270.643	16.0214
		61.3	4.06962	2.97858	3.42025	3.88006	3.58713	0.244401			61.3	247.225	307.662	270.843	222.978	302.876	270.317	16.1698
		61.4	4.06049	2.99407	3.3107	3.80368	3.54223	0.239972			61.4	247.297	307.598	270.84	223.029	302.838	270.32	16.146
		61.5	4.08005	3.03018	3.36931	3.8305	3.57751	0.234426			61.5	247.239	307.598	270.895	222.846	302.745	270.264	16.1677
		61.6	4.00571	2.96052	3.3846	3.80573	3.53914	0.232278			61.6	247.29	307.553	270.794	222.876	302.747	270.252	16.1544
		61.7	4.02006	2.94504	3.34892	3.78094	3.52374	0.237688			61.7	247.237	307.589	270.912	222.788	302.61	270.227	16.1618
		61.8	4.04353	2.96311	3.33619	3.76649	3.52733	0.237792			61.8	247.276	307.563	270.855	222.785	302.698	270.235	16.1652
		61.9	4.05267	3.00438	3.38715	3.81397	3.56454	0.231972			61.9	247.216	307.519	270.889	222.706	302.541	270.174	16.1601
		62	4.07746	2.91667	3.29797	3.81192	3.526	0.259668			62	247.257	307.429	270.834	222.591	302.468	270.116	16.1564
		62.1	3.98486	2.96311	3.27503	3.78093	3.50098	0.233251			62.1	247.163	307.379	270.82	222.503	302.429	270.059	16.1663
		62.2	4.04223	2.91926	3.32598	3.78093	3.5171	0.248212			62.2	247.24	307.245	270.812	222.52	302.352	270.034	16.1351
		62.3	4.04614	3.01469	3.3209	3.71486	3.52415	0.225408			62.3	247.153	307.273	270.72	222.367	302.311	269.965	16.1627
		62.4	4.07353	2.96826	3.26993	3.80572	3.52936	0.250772			62.4	247.155	307.112	270.682	222.323	302.287	269.912	16.1481
		62.5	3.99268	2.94504	3.22406	3.73345	3.47381	0.237804			62.5	247.17	307.137	270.654	222.401	302.194	269.911	16.129
		62.6	4.00701	2.93473	3.28013	3.73553	3.48935	0.238039			62.6	247.066	307.086	270.665	222.265	302.112	269.839	16.1422
		62.7	4.01745	2.927	3.37696	3.74789	3.51733	0.236552			62.7	247.057	307.036	270.642	222.183	302.197	269.823	16.1576
		62.8	3.99789	2.87797	3.24956	3.78713	3.47814	0.254634			62.8	246.968	307.009	270.553	222.17	302.063	269.753	16.1491
		62.9	3.96398	2.85734	3.2419	3.79952	3.46569	0.254936			62.9	246.927	306.88	270.685	222.142	302.065	269.74	16.1418
		63	4.05918	2.89862	3.27248	3.74997	3.49506	0.256336			63	246.88	306.94	270.743	222.227	302.019	269.762	16.1351
		63.1	4.00311	2.90892	3.25719	3.73551	3.47618	0.244037			63.1	247.23	306.694	270.459	222.397	302.168	269.79	16.0713
		63.2	4.00963	2.88571	3.26228	3.70453	3.46554	0.246758			63.2	246.026	307.33	271.041	221.657	301.442	269.499	16.2692
		63.3	3.96398	2.90119	3.27503	3.77681	3.47925	0.241412			63.3	246.833	306.938	270.814	222.224	301.98	269.758	16.135
		63.4	3.97181	2.92184	3.29032	3.74997	3.48348	0.234917			63.4	246.77	306.958	270.906	222.238	301.946	269.764	16.1367
		63.5	3.98876	2.91925	3.33362	3.74171	3.49583	0.234909			63.5	246.794	306.935	270.912	222.323	301.957	269.784	16.1209
		63.6	3.99137	2.87024	3.25718	3.75204	3.46771	0.251057			63.6	246.714	306.93	270.964	222.316	302.001	269.785	16.1316
		63.7	3.92747	2.91667	3.27249	3.72105	3.45942	0.22676			63.7	246.833	306.906	270.915	222.384	301.985	269.805	16.1087
		63.8	4.02918	2.89346	3.31071	3.73344	3.4917	0.247989			63.8	246.775	307.027	270.938	222.435	302.081	269.851	16.1289
		63.9	3.93137	2.89345	3.29032	3.76235	3.46937	0.235058			63.9	246.785	307.035	271.07	222.523	302.117	269.906	16.1202
		64	3.95877	2.91151	3.28521	3.67356	3.45726	0.228353			64	246.825	307.034	271.061	222.666	302.13	269.943	16.0975
		64.1	3.98745	2.91667	3.21389	3.73758	3.4639	0.243408			64.1	246.895	307.052	271.078	222.652	302.125	269.96	16.096
		64.2	3.9066	2.85734	3.25719	3.67976	3.42522	0.232243			64.2	246.926	307.188	271.23	222.768	302.326	270.088	16.1132
		64.3	3.92485	2.89603	3.25465	3.66529	3.4352	0.226569			64.3	246.864	307.26	271.36	222.859	302.323	270.133	16.1128
		64.4	3.9666	2.88313	3.30815	3.69421	3.46302	0.235814			64.4	246.994	307.347	271.406	222.937	302.404	270.218	16.1101
		64.5	3.93007	2.82637	3.247	3.69214	3.42389	0.244354			64.5	247.003	307.465	271.549	223.067	302.471	270.311	16.1114
		64.6	3.8792	2.85734	3.20624	3.68182	3.40615	0.231109			64.6	247.145	307.501	271.612	223.196	302.608	270.412	16.1002
		64.7	3.92617	2.87539	3.29541	3.60335	3.42508	0.22395			64.7	247.112	307.635	271.675	223.26	302.628	270.462	16.1109
		64.8	3.93137	2.86765	3.28012	3.66323	3.43559	0.231722			64.8	247.249	307.71	271.79	223.416	302.75	270.583	16.0992
		64.9	3.95354	2.83153	3.24957	3.69215	3.4317	0.247239			64.9	247.287	307.835	271.908	223.45	302.822	270.66	16.1137
		65	3.91834	2.8754	3.22663	3.65083	3.4178	0.230143			65	247.469	307.915	271.997	223.63	302.866	270.775	16.0879
		65.1	3.86878	2.8367	3.20369	3.62194	3.38278	0.227975			65.1	247.48	308.048	272.017	223.661	302.962	270.833	16.1077
		65.2	3.91181	2.83669	3.1884	3.59716	3.38351	0.234846			65.2	247.61	308.114	272.235	223.814	303.07	270.969	16.0952
		65.3	3.92746	2.85991	3.25465	3.61368	3.41393	0.230201			65.3	247.666	308.233	272.269	223.94	303.137	271.049	16.0933
		65.4	3.94181	2.79283	3.1833	3.55792	3.36897	0.246688			65.4	247.781	308.387	272.396	223.974	303.223	271.152	16.1067
		65.5	3.91312	2.81865	3.18331	3.56619	3.37032	0.236699			65.5	247.844	308.484	272.433	224.116	303.241	271.224	16.0945
		65.6	3.82183	2.82895	3.18841	3.64672	3.37148	0.2248			65.6	247.94	308.597	272.522	224.16	303.331	271.31	16.1035
		65.7	3.90659	2.79283	3.22154	3.58064	3.3754	0.23933			65.7	248.041	308.735	272.665	224.344	303.45	271.447	16.0976
		65.8	3.82965	2.84444	3.24191	3.66118	3.39429	0.221043			65.8	248.167	308.817	272.743	224.371	303.525	271.525	16.1016
		65.9	3.8453	2.72834	3.18585	3.59716	3.33916	0.244836			65.9	248.229	308.939	272.843	224.459	303.548	271.604	16.101
		66	3.86355	2.80831	3.18585	3.55792	3.35391	0.228634			66	248.321	308.974	272.958	224.538	303.667	271.692	16.0992
		66.1	3.86487	2.81348	3.12725	3.55792	3.34088	0.231923			66.1	248.429	309.124	273.024	224.592	303.737	271.781	16.108
		66.2	3.86617	2.79799	3.28268	3.60129	3.38703	0.229734			66.2	248.514	309.227	273.033	224.701	303.755	271.846	16.0997
		66.3	3.84269	2.80058	3.16293	3.56413	3.34258	0.22826			66.3	248.67	309.31	273.116	224.731	303.861	271.938	16.1044
		66.4	3.79443	2.80574	3.21643	3.57651	3.34828	0.216578			66.4	248.687	309.427	273.262	224.792	303.951	272.024	16.1172
		66.5	3.83877	2.78768	3.24444	3.58063	3.36288	0.227077			66.5	248.798	309.448	273.297	224.87	303.969	272.076	16.1021
		66.6	3.83095	2.80315	3.11961	3.59302	3.33668	0.231261			66.6	248.935	309.575	273.409	224.864	304.093	272.175	16.1207
		66.7	3.82182	2.80315	3.21642	3.60747	3.36222	0.224572			66.7	249	309.636	273.388	224.989	304.101	272.223	16.1053
		66.8	3.87531	2.83153	3.25209	3.54761	3.37663	0.221841			66.8	249.085	309.651	273.483	225.03	304.236	272.297	16.1086
		66.9	3.89354	2.81605	3.20115	3.58683	3.37439	0.233881			66.9	249.128	309.796	273.569	225.088	304.217	272.36	16.1124
		67	3.84399	2.82637	3.1884	3.49185	3.33765	0.216764			67	249.232	309.81	273.609	225.057	304.269	272.396	16.1163
		67.1	3.78922	2.72835	3.21644	3.55999	3.3235	0.230665			67.1	249.263	309.899	273.621	225.078	304.295	272.431	16.124
[truncated: 1,829 more rows]

## Sheet: Figure 1 Source Data
				FIGURE 1 D									FIGURE 1 E
Key													Twitch
Rest			Twitch										Isarc
Early Activation		Frame No.	Time (ms)	M06	M12	M23	M24	Average_Twitch_SL	Error_Twitch_SL			Frame No	Time (ms)	M06	M12	M23	M24	Average_Twitch_Isarc	Error_Twitch_Isarc
Peak Force		19	-18.5	2.34074	2.36218	2.40108	2.38469	2.37218	0.0131665			19	-18.5	0.99775	1.0009	0.969193	1.05226	1.00502	0.0172843
Isometric Relaxation		20	-13.5	2.33971	2.36284	2.40191	2.38488	2.37234	0.0134989			20	-13.5	0.986864	1.00799	0.930903	0.853316	0.944768	0.0345505
Chaotic Relaxation		21	-8.5	2.34085	2.36162	2.40004	2.38555	2.37201	0.0130631			21	-8.5	1.019	0.977578	0.974809	0.997836	0.992305	0.0102714
Mechanically Relaxed		22	-3.5	2.3405	2.36303	2.40163	2.3855	2.37267	0.013325			22	-3.5	0.99639	1.01353	1.1251	1.09659	1.0579	0.0313099
		23	1.5	2.34212	2.36244	2.39092	2.38424	2.36993	0.0110872			23	1.5	0.96366	0.945343	1.05369	0.78243	0.93628	0.0564847
		24	6.5	2.4402	2.39201	2.34781	2.3748	2.3887	0.0194258			24	6.5	0.951939	0.637457	0.671906	0.242905	0.626052	0.145841
		25	11.5	2.43764	2.39549	2.30975	2.3682	2.37777	0.0267971			25	11.5	0.749136	0.472802	0.318796	0.0805584	0.405323	0.140155
		26	16.5	2.4353	2.38348	2.3351	2.39033	2.38605	0.0205073			26	16.5	0.675451	0.339916	0.374038	0.130408	0.379953	0.112261
		27	21.5	2.42634	2.39177	2.35055	2.40834	2.39425	0.0161881			27	21.5	0.49588	0.370899	0.345194	0.212445	0.356104	0.0581043
		28	26.5	2.41344	2.38818	2.40783	2.42427	2.40843	0.00756286			28	26.5	0.410642	0.383653	0.250399	0.208094	0.313197	0.0495393
		29	31.5	2.41283	2.40337	2.41921	2.42579	2.4153	0.00477465			29	31.5	0.433193	0.273512	0.265204	0.169121	0.285258	0.0547058
		30	36.5	2.41445	2.41116	2.43394	2.43271	2.42306	0.0059672			30	36.5	0.454096	0.236432	0.284899	0.211486	0.296728	0.0546247
		31	41.5	2.4147	2.41544	2.44727	2.43362	2.42776	0.00783807			31	41.5	0.498461	0.313787	0.313273	0.334148	0.364917	0.0447791
		32	46.5	2.41642	2.41957	2.42498	2.43252	2.42337	0.00352563			32	46.5	0.573377	0.415772	0.36087	0.325318	0.418834	0.0547707
		33	51.5	2.41908	2.42058	2.40663	2.42403	2.41758	0.00379264			33	51.5	0.626344	0.521633	0.381027	0.360358	0.47234	0.0625999
		34	56.5	2.41958	2.41718	2.40324	2.42118	2.41529	0.00410189			34	56.5	0.654185	0.610434	0.323376	0.32355	0.477886	0.0896025
		35	61.5	2.41747	2.41125	2.40116	2.41295	2.41071	0.00344237			35	61.5	0.736791	0.663454	0.31082	0.326846	0.509478	0.11113
		36	66.5	2.41741	2.40674	2.39336	2.39847	2.40399	0.00525208			36	66.5	0.781691	0.718695	0.313827	0.255866	0.51752	0.135466
		37	71.5	2.41673	2.40254	2.39185	2.39623	2.40184	0.00542832			37	71.5	0.805081	0.740177	0.343259	0.268746	0.539316	0.136205
		38	76.5	2.41425	2.39933	2.3887	2.39407	2.39909	0.00550011			38	76.5	0.846588	0.743479	0.446645	0.322628	0.589835	0.12296
		39	81.5	2.41567	2.39724	2.38577	2.39315	2.39796	0.00636289			39	81.5	0.893688	0.804293	0.514599	0.313951	0.631633	0.133261
		40	86.5	2.41634	2.39126	2.38498	2.39237	2.39624	0.00689513			40	86.5	0.878196	0.753525	0.445236	0.312454	0.597353	0.13152
		41	91.5	2.41273	2.39021	2.38211	2.39081	2.39397	0.00656182			41	91.5	0.925341	0.796622	0.481812	0.388933	0.648177	0.127063
		42	96.5	2.41321	2.3857	2.37956	2.38924	2.39193	0.0073702			42	96.5	0.911601	0.804371	0.449854	0.378646	0.636118	0.130763
				FIGURE 1 D									FIGURE 1 E
													Tetanus
		Tetanus											Isarc
		Frame No	Time (ms)	M05	M10	M11	M23	M24	Average_Tetanus_SL	Error_Tetanus_SL		Frame No	Time (ms)	M05	M10	M11	M23	M24	Average_Tetanus_Isarc	Error_Tetanus_ISarc
	High Order Assignment	19	-18.5	2.40244	2.45254	2.42466	2.39909	2.37287	2.41032	0.0133776		19	-18.5	0.965846	0.882053	1.0084	0.980181	1.03786	0.974867	0.0262835
		20	-13.5	2.39978	2.45628	2.42655	2.39819	2.37265	2.41069	0.0142338		20	-13.5	1.04304	0.978381	0.970349	1.00956	1.00003	1.00027	0.0128257
		21	-8.5	2.40186	2.457	2.42584	2.39835	2.37313	2.41124	0.0141662		21	-8.5	0.99629	1.06311	1.02547	0.992903	0.973303	1.01021	0.0156305
		22	-3.5	2.39938	2.45449	2.42413	2.39929	2.37315	2.41009	0.0137188		22	-3.5	0.994824	1.07646	0.995789	1.01736	0.988803	1.01465	0.0161934
		23	1.5	2.39762	2.45806	2.41943	2.39041	2.36732	2.40657	0.0153266		23	1.5	1.01871	0.855834	1.10776	1.03351	0.967844	0.99673	0.0417426
		24	6.5	2.4181	2.44722	2.37733	2.36058	2.36022	2.39269	0.0172334		24	6.5	0.555402	0.906145	0.84407	0.856287	0.377992	0.707979	0.102946
		25	11.5	2.4608	2.43592	2.33033	2.29477		2.38045	0.0401939		25	11.5	0.431383	0.911904	0.458008	0.532057		0.583338	0.111573
	Low Order Assignment	26	16.5	2.13124	2.11287			2.19304	2.14571	0.0242496		26	16.5	0.580237	0.668322			0.445243	0.564601	0.0648702
		27	21.5	2.12276	2.11945	2.18572		2.17616	2.15102	0.0173967		27	21.5	0.653898	0.555029	0.337524		0.554721	0.525293	0.0667998
		28	26.5	2.11507	2.1171	2.1695	2.17181	2.16588	2.14787	0.0130168		28	26.5	0.665913	0.416584	0.354741	0.796205	0.667784	0.580245	0.0834499
		29	31.5	2.10933	2.11394	2.15988	2.16164	2.16052	2.14106	0.0120393		29	31.5	0.693257	0.356392	0.435027	0.819945	0.641369	0.589198	0.0850769
		30	36.5	2.10156	2.11496	2.1547	2.15376	2.1596	2.13692	0.0119303		30	36.5	0.648561	0.309227	0.446572	0.809913	0.579425	0.55874	0.0855634
		31	41.5	2.10162	2.11251	2.14883	2.14772	2.1583	2.1338	0.0111999		31	41.5	0.597752	0.300773	0.510056	0.763039	0.585493	0.551423	0.0750418
		32	46.5	2.1015	2.11142	2.14469	2.14438	2.15743	2.13188	0.0107575		32	46.5	0.564484	0.26788	0.542227	0.759916	0.63516	0.553934	0.0809634
		33	51.5	2.10009	2.11172	2.14044	2.14212	2.15529	2.12993	0.0103064		33	51.5	0.521122	0.286181	0.521767	0.692436	0.548156	0.513932	0.0651992
		34	56.5	2.10112	2.11191	2.14024	2.1452	2.15691	2.13108	0.010524		34	56.5	0.499735	0.293954	0.517169	0.650394	0.554754	0.503201	0.0584444
		35	61.5	2.09907	2.11237	2.14347	2.14252	2.17836	2.13516	0.0138051		35	61.5	0.475939	0.256435	0.488715	0.671079	0.543282	0.48709	0.067208
		36	66.5	2.10073	2.11213	2.13832	2.14248	2.15722	2.13018	0.0103497		36	66.5	0.450735	0.309171	0.521683	0.651434	0.497888	0.486182	0.0553602
		37	71.5	2.10198	2.1092	2.13802	2.14263	2.15841	2.13005	0.0106022		37	71.5	0.470928	0.251291	0.490661	0.596466	0.54085	0.470039	0.0588535
		38	76.5	2.10293	2.11205	2.1385	2.14408	2.15667	2.13084	0.0100824		38	76.5	0.45848	0.276588	0.493766	0.596296	0.508534	0.466733	0.0526725
		39	81.5	2.10097	2.1138	2.13786	2.14495	2.15878	2.13127	0.0105136		39	81.5	0.449062	0.290179	0.482107	0.596296	0.508119	0.465153	0.0501033
		40	86.5	2.10288	2.11103	2.13585	2.14501	2.15711	2.13038	0.0102194		40	86.5	0.439429	0.275978	0.464496	0.566359	0.533864	0.456025	0.0504958
		41	91.5	2.10205	2.11112	2.13548	2.1429	2.1581	2.12993	0.0103049		41	91.5	0.439816	0.240296	0.453994	0.540925	0.470336	0.429074	0.0502925
		42	96.5	2.10189	2.11324	2.13502	2.14179	2.1544	2.12927	0.00956065		42	96.5	0.408944	0.284136	0.426544	0.536229	0.488494	0.428869	0.0426798
		43	101.5	2.10198	2.11038	2.13745	2.14357	2.16003	2.13068	0.0107449		43	101.5	0.417207	0.299395	0.447825	0.509062	0.467669	0.428232	0.0354916
		44	106.5	2.10308	2.11138	2.13676	2.14076	2.15759	2.12991	0.00998549		44	106.5	0.390341	0.295952	0.40237	0.527444	0.437269	0.410675	0.0374073
		45	111.5	2.10369	2.10676	2.13761	2.14317	2.15674	2.12959	0.0104353		45	111.5	0.409819	0.281128	0.441451	0.536041	0.443515	0.422391	0.0411333
		46	116.5	2.10477	2.10476	2.14055	2.14593	2.16032	2.13127	0.011291		46	116.5	0.419945	0.273465	0.438461	0.538027	0.45839	0.425658	0.0430449
		47	121.5	2.10243	2.09988	2.13872	2.14754	2.16353	2.13042	0.0125985		47	121.5	0.428363	0.209712	0.35763	0.4405	0.441279	0.375497	0.0442444
		48	126.5									48	126.5	0.329678	0.209394	0.259112	0.386622	0.493421	0.335646	0.0496608
		49	131.5									49	131.5	0.233348	0.223792	0.278024	0.373793	0.449023	0.311596	0.0434247
		50	136.5									50	136.5	0.210455	0.221679	0.246936	0.356385	0.33033	0.273157	0.0295506
		51	141.5									51	141.5	0.303943	0.303287	0.278131	0.349021	0.365225	0.319921	0.0160898
		52	146.5									52	146.5	0.361784	0.374502	0.396881	0.364384	0.455189	0.390548	0.017303
	High Order Assignment	53	151.5	2.40435	2.4183	2.40167	2.41601	2.41175	2.41042	0.00322758		53	151.5	0.403792	0.503997	0.463907	0.510769	0.397544	0.456002	0.0239882
		54	156.5	2.39496	2.40826	2.392	2.41054	2.41035	2.40322	0.00402444		54	156.5	0.401578	0.63785	0.5339	0.5589	0.496669	0.525779	0.0387273
		55	161.5	2.39414	2.39639	2.38602	2.40626	2.41524	2.39961	0.00506691		55	161.5	0.441346	0.630483	0.607474	0.585356	0.511165	0.555165	0.0347931
		56	166.5	2.39465	2.38662	2.39349	2.40583	2.41508	2.39913	0.0050379		56	166.5	0.445639	0.719396	0.548033	0.476028	0.520846	0.541988	0.0477446
		57	171.5	2.39735	2.38364	2.40766	2.40304	2.41583	2.4015	0.00539435		57	171.5	0.447876	0.75175	0.585022	0.489279	0.460967	0.546979	0.0565363
		58	176.5	2.39868	2.38728	2.42092	2.3991	2.41277	2.40375	0.00589439		58	176.5	0.491895	0.721273	0.563682	0.457452	0.470683	0.540997	0.0486563
		59	181.5	2.39886	2.40091	2.42514	2.39844	2.41036	2.40674	0.00508287		59	181.5	0.470264	0.6147	0.537052	0.50561	0.519083	0.529342	0.0239833
		60	186.5	2.39924	2.40744	2.42206	2.39192	2.40784	2.4057	0.0050332		60	186.5	0.4815	0.544735	0.533904	0.5607	0.508879	0.525944	0.0139479
		61	191.5	2.40045	2.41442	2.43045	2.38738	2.40341	2.40722	0.00723077		61	191.5	0.495373	0.565958	0.519541	0.481652	0.433665	0.499238	0.0217805
		62	196.5	2.39915	2.41752	2.42452	2.39223	2.39967	2.40662	0.00612587		62	196.5	0.512341	0.546825	0.542825	0.531374	0.446859	0.516045	0.018303
		63	201.5	2.39499	2.41648	2.42105	2.38794	2.39815	2.40372	0.00640033		63	201.5	0.467765	0.578796	0.556897	0.505242	0.476573	0.517055	0.0219171
		64	206.5	2.39664	2.42021	2.42362	2.38164	2.39835	2.40409	0.00785461		64	206.5	0.515262	0.619501	0.489829	0.552718	0.441842	0.52383	0.029949
		65	211.5	2.39278	2.41964	2.41808	2.38746	2.39206	2.402	0.00694698		65	211.5	0.5253	0.561394	0.542139	0.563823	0.442901	0.527112	0.022185
		66	216.5	2.39603	2.41986	2.41294	2.39012	2.39649	2.40309	0.00565636		66	216.5	0.527229	0.568491	0.54411	0.47762	0.431606	0.509811	0.0245717
		67	221.5	2.3958	2.42089	2.414	2.38507	2.38883	2.40092	0.00704806		67	221.5	0.540116	0.620005	0.599484	0.458063	0.417579	0.527049	0.0392435
		68	226.5	2.39518	2.42074	2.41181	2.38548	2.38815	2.40027	0.00686866		68	226.5	0.534399	0.650803	0.571269	0.51963	0.486147	0.55245	0.0281305
