# Supplementary material for: Myosin-based regulation of twitch and tetanic contractions in mammalian skeletal muscle
Source: eLife. 2021 Jun 14;10:e68211. doi: 10.7554/eLife.68211 (PMC8275128; doi:10.7554/eLife.68211)
Supplement: Figure 2—source data 1. [file elife-68211-fig2-data1.xlsx]

## Sheet: 1D Profiles - Equatorials
		Rest		Early Activation		Peak Force		Mechanically Relaxed
Key	Reciprocal Spacing (nm-1)	Mean Twitch Intensity	Mean Tetanus Intensity	Mean Twitch Intensity	Mean Tetanus Intensity	Mean Twitch Intensity	Mean Tetanus Intensity	Mean Twitch Intensity	Mean Tetanus Intensity
Rest	0.0201414	0.0010517	0.00106146	0.00112997	0.00127861	0.00104618	0.0011999	0.000738117	0.0009677
Early Activation	0.0203512	0.00118794	0.00134915	0.00104695	0.000518908	0.000976373	0.00112588	0.000915946	0.00107684
Peak Force	0.020561	0.0010508	0.000964166	0.000504206	0.00217408	0.000910125	0.000947306	0.000703775	0.000995194
Mechanically Relaxed	0.0207708	0.00103514	0.00118401	0.00142067	0.00107067	0.000935868	0.00109022	0.000904022	0.0010063
	0.0209807	0.000843386	0.00146813	0.00107453	0.000958838	0.000537939	0.00114629	0.00097807	0.00108931
	0.0211905	0.00102823	0.00119409	0.000881404	0.0013899	0.000500396	0.000836317	0.000527248	0.00100471
	0.0214003	0.000959166	0.00118042	0.000770243	0.000592523	0.00123597	0.000797132	0.000645578	0.000846499
	0.0216101	0.000723566	0.00153812	0.000932854	0.000996019	0.000768308	0.00103323	0.000671504	0.00110954
	0.0218199	0.000492112	0.000857325	0.000452517	0.00152301	0.000607925	0.00122067	0.000803173	0.000818672
	0.0220297	0.000889915	0.00115043	0.00036458	0.000562177	0.000503092	0.00119549	0.000802256	0.00107744
	0.0222395	0.000823408	0.00121297	0.00050102	0.00134385	0.0010232	0.00103419	0.000566762	0.00132536
	0.0224493	0.000673446	0.00171874	0.000614059	0.000874671	0.0010298	0.000808283	0.00111763	0.00117816
	0.0226591	0.00141076	0.00138609	0.000827284	0.0012288	0.000910105	0.00109267	0.000942229	0.00151906
	0.0228689	0.000955303	0.00164523	0.00114109	0.00177763	0.000991807	0.00125594	0.00093607	0.0020075
	0.0230787	0.000950668	0.00158174	0.000694153	0.00140957	0.0012743	0.00162694	0.00125209	0.00174562
	0.0232885	0.00150276	0.00217066	0.00149784	0.002434	0.00164639	0.00204334	0.00129373	0.0023589
	0.0234983	0.0012258	0.00191024	0.00156624	0.00297882	0.000944431	0.00182113	0.00166743	0.00267461
	0.0237081	0.00164276	0.00272079	0.0022512	0.0031216	0.00199695	0.00234348	0.0020594	0.00375549
	0.0239179	0.00188072	0.00273427	0.00182913	0.00376253	0.00211056	0.00263706	0.00212678	0.00405841
	0.0241277	0.00249979	0.00386539	0.00356107	0.00514673	0.00297475	0.00410053	0.00269453	0.0057483
	0.0243376	0.00293649	0.00471431	0.00394365	0.00635162	0.00367258	0.00464797	0.00333663	0.00738686
	0.0245474	0.00360496	0.0058379	0.00529833	0.00658838	0.00451561	0.00495162	0.00417053	0.00860873
	0.0247572	0.00384461	0.00631011	0.00546928	0.00830282	0.0047308	0.00634411	0.00477828	0.0112493
	0.024967	0.00447078	0.00815528	0.00655198	0.00981395	0.00561307	0.00721834	0.00598149	0.0140486
	0.0251768	0.00524718	0.00891738	0.00872675	0.0126405	0.00752505	0.00916715	0.00777674	0.0168901
	0.0253866	0.00618271	0.0107522	0.0100103	0.0148714	0.00892138	0.0108808	0.00935407	0.0205205
	0.0255964	0.00767173	0.0123165	0.01219	0.0178411	0.0110164	0.0129197	0.0114997	0.0246445
	0.0258062	0.0100292	0.0149791	0.0154341	0.0222019	0.0134018	0.0153198	0.0147312	0.0303256
	0.026016	0.0125535	0.0181758	0.0191832	0.0265962	0.016705	0.0179004	0.0193679	0.0369992
	0.0262258	0.0157444	0.0226076	0.0221146	0.0330747	0.0200437	0.0210774	0.0254217	0.0453151
	0.0264356	0.0207437	0.0287462	0.0280894	0.0397633	0.0248176	0.0245985	0.0330058	0.0551837
	0.0266454	0.0282597	0.037559	0.0339248	0.0479327	0.0293587	0.0284988	0.0433976	0.0680137
	0.0268552	0.0380066	0.0485066	0.0430819	0.0599944	0.035218	0.0320963	0.0565298	0.0814826
	0.027065	0.0504451	0.0624199	0.0518657	0.0686952	0.0419279	0.0356628	0.0717897	0.0963328
	0.0272748	0.0676716	0.0802471	0.059996	0.0818351	0.0490935	0.0387679	0.0880983	0.109867
	0.0274847	0.0876947	0.100562	0.0695193	0.0919496	0.0553707	0.0412368	0.106735	0.120681
	0.0276945	0.108065	0.122208	0.0805553	0.100773	0.0613295	0.0426343	0.123903	0.127745
	0.0279043	0.128577	0.143088	0.0875155	0.10669	0.0673363	0.0451609	0.13759	0.128937
	0.0281141	0.146932	0.157544	0.0918276	0.109447	0.070607	0.0467363	0.14557	0.124276
	0.0283239	0.158571	0.163817	0.0924556	0.107981	0.070745	0.0464412	0.147386	0.115428
	0.0285337	0.162137	0.159445	0.0913901	0.0987051	0.0690701	0.0450333	0.141797	0.101437
	0.0287435	0.157337	0.146642	0.0879879	0.0919187	0.0653516	0.043829	0.130338	0.0857949
	0.0289533	0.144998	0.124766	0.0797679	0.0779045	0.0597763	0.0404454	0.113263	0.0707475
	0.0291631	0.125216	0.10181	0.0703676	0.0655844	0.0545966	0.0372136	0.0952629	0.0567006
	0.0293729	0.101506	0.0791993	0.0590368	0.0516094	0.0471207	0.0335037	0.0765415	0.0436385
	0.0295827	0.0791567	0.0601394	0.0485729	0.0413778	0.0393597	0.0299763	0.0600084	0.0338464
	0.0297925	0.0593525	0.0450036	0.0378244	0.0312309	0.0330103	0.0264323	0.0459689	0.0260853
	0.0300023	0.04378	0.0336484	0.0290433	0.0249204	0.0264633	0.0231633	0.034664	0.0197143
	0.0302121	0.0322208	0.0249672	0.0222156	0.0182908	0.0207937	0.0201439	0.0260397	0.0154696
	0.0304219	0.0237568	0.0193685	0.0181105	0.013588	0.0166359	0.0166992	0.0199187	0.01245
	0.0306318	0.0180347	0.0149395	0.0133745	0.0118243	0.0130318	0.0138489	0.0154222	0.00964339
	0.0308416	0.0141671	0.0117082	0.0106194	0.00905594	0.0102693	0.0120482	0.0117614	0.00819564
	0.0310514	0.0114491	0.00965234	0.00818393	0.00678016	0.00816938	0.0102914	0.00952068	0.00654894
	0.0312612	0.00912306	0.00744059	0.00636972	0.00574696	0.00694632	0.0085515	0.00776129	0.00515315
	0.031471	0.00754765	0.00625486	0.00476044	0.00405393	0.0056204	0.00742925	0.00621768	0.00448839
	0.0316808	0.00624147	0.00542984	0.0047528	0.00361147	0.00494575	0.00585158	0.00527012	0.00390521
	0.0318906	0.00537675	0.00455163	0.0041787	0.00380296	0.0036285	0.00485331	0.0044778	0.00309628
	0.0321004	0.00427034	0.00359627	0.00338038	0.00232593	0.00304741	0.00419171	0.00366967	0.00298262
	0.0323102	0.00367173	0.00303986	0.00256067	0.00239545	0.00305612	0.00362334	0.00333518	0.00227206
	0.03252	0.00324038	0.00305975	0.00179576	0.00155039	0.00238482	0.00291243	0.00280945	0.00196788
	0.0327298	0.00270272	0.00231524	0.00205383	0.00169587	0.00225517	0.00255752	0.00236762	0.00173175
	0.0329396	0.0025644	0.00231422	0.00180152	0.00132518	0.00134949	0.00210738	0.00198754	0.00146181
	0.0331494	0.00202467	0.00189452	0.00175749	0.000881572	0.00118724	0.0017589	0.00180006	0.0012983
	0.0333592	0.0019086	0.001605	0.0011014	0.000735475	0.00131191	0.00145099	0.00177329	0.0012093
	0.033569	0.00151571	0.0015748	0.00154769	0.000514151	0.0010974	0.00126547	0.00143918	0.001015
	0.0337788	0.00129829	0.0014388	0.00179952	0.00146225	0.00130487	0.00138762	0.00114719	0.000948587
	0.0339887	0.00111476	0.00122919	0.00155943	0.00109285	0.00107578	0.00133873	0.00127217	0.00119054
	0.0341985	0.00104614	0.00123025	0.00110488	0.000665347	0.000853977	0.00121685	0.00126	0.000804581
	0.0344083	0.000694762	0.00106083	0.00113655	0.000948097	0.00055506	0.000963693	0.000756042	0.000975598
	0.0346181	0.000795002	0.001078	0.000931951	0.00106388	0.000714478	0.000880032	0.000701391	0.00094048
	0.0348279	0.000888687	0.000976691	0.000609701	0.00112704	0.000913902	0.000840626	0.000752256	0.00100131
	0.0350377	0.000779443	0.000850463	0.000822801	0.00100557	0.000718158	0.000834573	0.00102961	0.00101625
	0.0352475	0.000678751	0.000863364	0.000786939	0.000925078	0.000610099	0.000978088	0.000731329	0.000969383
	0.0354573	0.000617536	0.00100862	0.00138087	0.000722184	0.000582146	0.00122292	0.000538434	0.000699442
	0.0356671	0.00083237	0.000865802	0.000808945	0.00145114	0.000442741	0.00127327	0.000645284	0.000594679
	0.0358769	0.00059532	0.000940605	0.00167565	0.00175095	0.000926683	0.00167335	0.000619447	0.00071167
	0.0360867	0.000913935	0.000895418	0.00153825	0.00172422	0.00079757	0.00164223	0.000649299	0.000926235
	0.0362965	0.000773827	0.000851016	0.00142544	0.000854014	0.00100662	0.00175629	0.00063647	0.000777729
	0.0365063	0.000580209	0.000753944	0.00137119	0.00180949	0.00105835	0.00169329	0.000616095	0.00107671
	0.0367161	0.00050766	0.000625272	0.00141415	0.00193931	0.000842508	0.00163569	0.00062261	0.000879835
	0.0369259	0.000661264	0.000989698	0.00159173	0.0020837	0.00127247	0.00199534	0.000910589	0.000879941
	0.0371358	0.000661738	0.00103361	0.00165339	0.00198046	0.00139567	0.00217218	0.00122549	0.00123414
	0.0373456	0.000624734	0.000866792	0.00189031	0.0018731	0.00146462	0.00227058	0.00104035	0.00132727
	0.0375554	0.000582422	0.00094912	0.00179226	0.00214365	0.00154565	0.00200109	0.000856599	0.00127125
	0.0377652	0.000616173	0.000845102	0.0023098	0.00235174	0.00154064	0.00215957	0.00128604	0.0014284
	0.037975	0.000751965	0.000920536	0.0025726	0.00186211	0.00165626	0.00241097	0.000896276	0.0016274
	0.0381848	0.00087428	0.000880843	0.00247919	0.0029761	0.00164445	0.00229727	0.000917056	0.00133485
	0.0383946	0.00103738	0.00113927	0.00235087	0.00301189	0.00181595	0.00277017	0.00121963	0.00174977
	0.0386044	0.000940846	0.00139929	0.00209638	0.00273764	0.00181438	0.00274197	0.00148026	0.00175482
	0.0388142	0.000891725	0.00134096	0.00286086	0.00270682	0.00231618	0.00264052	0.0014349	0.00204501
	0.039024	0.00111872	0.00152928	0.00276716	0.00321597	0.00275704	0.0030298	0.00131636	0.00228367
	0.0392338	0.00125856	0.00175843	0.00300703	0.0039465	0.00252683	0.00337149	0.00165821	0.00246779
	0.0394436	0.00138211	0.00192677	0.00384098	0.00373593	0.00265237	0.00370712	0.00151489	0.00248601
	0.0396534	0.00160096	0.00238753	0.00375368	0.00441554	0.00263666	0.00376668	0.00201364	0.00271961
	0.0398632	0.00161931	0.00237849	0.00338579	0.004785	0.0029318	0.0040085	0.00195218	0.00273364
	0.040073	0.00179876	0.00244504	0.00430367	0.00464211	0.00336166	0.00407121	0.00225073	0.00309775
	0.0402829	0.00201765	0.00272332	0.00453988	0.00519162	0.0030657	0.00445411	0.00231173	0.0035152
	0.0404927	0.00221679	0.00318514	0.00419425	0.00534083	0.00344056	0.00416062	0.00267467	0.00389799
	0.0407025	0.00216682	0.00321228	0.00478634	0.00557466	0.0033481	0.00485683	0.00258432	0.00389462
	0.0409123	0.00261475	0.0034488	0.00461953	0.00534348	0.00397347	0.0050813	0.00298861	0.00387857
	0.0411221	0.00302795	0.00367884	0.00537321	0.00571765	0.00378655	0.00552172	0.00325598	0.00413286
	0.0413319	0.00340573	0.00402317	0.00521645	0.00598169	0.00427877	0.00566469	0.00362192	0.00428413
	0.0415417	0.00354698	0.0042951	0.00484243	0.00633846	0.00416862	0.00647268	0.00390672	0.00469801
	0.0417515	0.00362345	0.00456798	0.00579551	0.00647018	0.00466421	0.00707208	0.00416605	0.00514139
	0.0419613	0.00396557	0.00470584	0.00580995	0.00756069	0.00479876	0.0076475	0.0045557	0.00531315
	0.0421711	0.0043101	0.00508833	0.00624341	0.00706862	0.00543325	0.00786981	0.00475102	0.00604607
	0.0423809	0.00457276	0.00532496	0.00641479	0.00745314	0.00570904	0.00890287	0.00496617	0.00650015
	0.0425907	0.00471963	0.00536571	0.00622261	0.00783556	0.00617069	0.0100953	0.00504031	0.00650254
	0.0428005	0.00488586	0.00580225	0.00625395	0.00892266	0.0063489	0.0108615	0.00529872	0.00644529
	0.0430103	0.00519535	0.00590932	0.00671845	0.00880243	0.0065186	0.0115595	0.00531255	0.00688017
	0.0432201	0.00537651	0.00582836	0.00704874	0.00887566	0.00746402	0.0129225	0.00565665	0.00741437
	0.0434299	0.00547217	0.00623313	0.00763458	0.0101225	0.00786062	0.0141168	0.00550534	0.00789554
	0.0436398	0.0056216	0.00634927	0.00871302	0.0113183	0.00798537	0.0151368	0.00600983	0.00867962
	0.0438496	0.00567593	0.00644713	0.00852652	0.0116904	0.00805488	0.0163931	0.00623845	0.00898759
	0.0440594	0.00574168	0.00629914	0.0100948	0.0112014	0.0086583	0.0186519	0.0062267	0.00934328
	0.0442692	0.00572177	0.00639118	0.00905237	0.0128662	0.0103007	0.0200676	0.00605975	0.0101019
	0.044479	0.00556693	0.00665072	0.0101235	0.0147409	0.0109089	0.0215608	0.00667502	0.0108056
	0.0446888	0.00559624	0.00653089	0.0116649	0.0157069	0.0115594	0.0235013	0.006923	0.0114875
	0.0448986	0.00626112	0.00683166	0.0128105	0.0160519	0.0128202	0.0254627	0.00737263	0.0126593
	0.0451084	0.00601012	0.00755173	0.0124953	0.0173671	0.0131893	0.0273244	0.00780619	0.0134014
	0.0453182	0.00601752	0.0073587	0.015001	0.0189488	0.0151097	0.0293842	0.00834511	0.0144193
	0.045528	0.00641451	0.00801294	0.0150389	0.0206168	0.0162162	0.0313076	0.00914785	0.0157938
	0.0457378	0.00671548	0.00873055	0.01619	0.02248	0.0176552	0.033919	0.0101405	0.0173365
	0.0459476	0.00738898	0.00919263	0.0187026	0.0243812	0.0190146	0.0353151	0.0112765	0.0186012
	0.0461574	0.00782526	0.0100227	0.0199304	0.026022	0.0197132	0.0376658	0.0122218	0.0212822
	0.0463672	0.00891921	0.0116095	0.0213246	0.0290954	0.0217803	0.0399342	0.0137002	0.0234616
	0.046577	0.00990794	0.0128641	0.0231327	0.0287642	0.0230159	0.0414798	0.0156189	0.0253277
	0.0467869	0.0109215	0.0139132	0.0241395	0.0322756	0.0244404	0.042686	0.0174734	0.0277804
	0.0469967	0.0124407	0.0155961	0.0258083	0.0350978	0.0265269	0.0440283	0.0197719	0.0296961
	0.0472065	0.014809	0.0179	0.0291675	0.035698	0.0282788	0.0447114	0.0219597	0.0320328
	0.0474163	0.0171223	0.0197944	0.0302818	0.037636	0.0294871	0.0458631	0.0243572	0.0340255
	0.0476261	0.0193075	0.0227359	0.0328718	0.040992	0.0311805	0.0460683	0.0262157	0.0356924
	0.0478359	0.0217317	0.0253963	0.0348389	0.0426112	0.0316381	0.046212	0.0286815	0.0378373
	0.0480457	0.0246019	0.0283191	0.0347293	0.0439198	0.0330735	0.0456106	0.0306304	0.0381135
	0.0482555	0.0282199	0.0316268	0.0369399	0.0446416	0.0337581	0.0461263	0.0330852	0.0394403
	0.0484653	0.0304254	0.0345152	0.0371287	0.0443559	0.0347515	0.0452015	0.0348111	0.0388313
	0.0486751	0.031889	0.0364759	0.0373252	0.0456144	0.0347652	0.0439035	0.0353182	0.0383015
	0.0488849	0.0343614	0.0391008	0.0386055	0.0454867	0.0351012	0.0433159	0.0367051	0.0369247
	0.0490947	0.036509	0.0402323	0.0377388	0.0445547	0.0340718	0.0421006	0.0369062	0.0356749
	0.0493045	0.037134	0.0401924	0.0375815	0.0425606	0.0330194	0.0402782	0.036346	0.0330887
	0.0495143	0.0376929	0.0402065	0.0371694	0.0410067	0.0320335	0.0388417	0.0355539	0.0311403
	0.0497241	0.0378799	0.0390522	0.0361424	0.0396541	0.0325514	0.0377738	0.0345126	0.0288612
	0.0499339	0.0371391	0.0375526	0.0348536	0.0373897	0.0315912	0.0362789	0.0331934	0.0265219
	0.0501438	0.0363057	0.0359322	0.0344118	0.0357356	0.0299708	0.0355064	0.0315916	0.0248545
	0.0503536	0.0334246	0.0319092	0.0311477	0.0311149	0.0276189	0.0323587	0.0286251	0.0222029
	0.0505634	0.0309744	0.0288517	0.0295382	0.0301672	0.0266976	0.0299754	0.0261919	0.0194357
	0.0507732	0.0289914	0.0255882	0.027711	0.0261345	0.0247662	0.0285815	0.0235353	0.0170304
	0.050983	0.0256708	0.0230662	0.0257475	0.0235124	0.0229502	0.0269941	0.0208128	0.0149493
	0.0511928	0.0234456	0.0202326	0.0231365	0.0219489	0.0213232	0.025131	0.0186188	0.0132221
	0.0514026	0.0201314	0.018086	0.0213516	0.0197974	0.0200304	0.0236672	0.016203	0.0119447
	0.0516124	0.0177949	0.0151873	0.0188267	0.017909	0.0181742	0.0224181	0.0141725	0.0102262
	0.0518222	0.0156184	0.0134577	0.0168636	0.0150022	0.0169891	0.0208437	0.0122663	0.00900053
	0.052032	0.0137886	0.0116531	0.0151058	0.0143052	0.0153686	0.0194144	0.0106687	0.0077662
	0.0522418	0.0114549	0.0098119	0.0133504	0.0123354	0.0134939	0.0180927	0.00959541	0.00695436
	0.0524516	0.00988339	0.00858771	0.0122732	0.0104755	0.0123255	0.016444	0.00812264	0.00653901
	0.0526614	0.00853199	0.00752151	0.0110563	0.0102794	0.0108121	0.015674	0.00740142	0.00565343
	0.0528712	0.00755359	0.00660337	0.00976564	0.00970911	0.010374	0.0144999	0.00602164	0.00493907
	0.053081	0.00657115	0.00563728	0.00890524	0.00845056	0.00925758	0.0135443	0.00575526	0.00472073
	0.0532909	0.00577247	0.00501887	0.00773336	0.00793445	0.00845359	0.0124727	0.0050988	0.00433339
	0.0535007	0.00466487	0.00459984	0.00716357	0.00695801	0.00783679	0.0114583	0.00434245	0.00372837
	0.0537105	0.00431084	0.0041676	0.00701447	0.00645598	0.00702147	0.0105589	0.00395742	0.0036554
	0.0539203	0.00388208	0.00375766	0.00575043	0.00612328	0.00610902	0.00974754	0.00346728	0.00315814
	0.0541301	0.0034046	0.00357126	0.00458011	0.00602294	0.00541723	0.00893176	0.00324258	0.0030649
	0.0543399	0.00292064	0.00316127	0.00493683	0.005341	0.00547174	0.0081567	0.00299975	0.00314077
	0.0545497	0.00289235	0.00304607	0.00464791	0.00498147	0.00456784	0.00790128	0.00280062	0.00321383
	0.0547595	0.00274671	0.00298773	0.00362099	0.0046552	0.00438925	0.00706543	0.002493	0.00260098
	0.0549693	0.0029238	0.00292005	0.00373036	0.00397152	0.00400882	0.00672696	0.00247013	0.00269897
	0.0551791	0.00278025	0.00264268	0.00311235	0.00385448	0.00377189	0.00622786	0.0026077	0.00297973
	0.0553889	0.00242311	0.00276826	0.00353614	0.00439978	0.00372849	0.00558689	0.00254457	0.00301545
	0.0555987	0.00236597	0.00265442	0.00276428	0.00338093	0.00322757	0.00544105	0.00254884	0.00255485
	0.0558085	0.00258796	0.00283074	0.00275716	0.00315735	0.00284178	0.00494053	0.00282113	0.00273729
	0.0560183	0.0026791	0.00324501	0.00307217	0.00356755	0.00265647	0.00456022	0.00265029	0.00282736
	0.0562281	0.00256035	0.00328558	0.00316521	0.00332514	0.00253602	0.00425342	0.00273397	0.00276361
	0.056438	0.00267734	0.00314587	0.00263167	0.00281065	0.00251074	0.00366235	0.00242658	0.0028013
	0.0566478	0.00267476	0.00332797	0.00223698	0.00281619	0.00230753	0.00344231	0.00274514	0.00259992
	0.0568576	0.00267286	0.00344277	0.00213023	0.00318526	0.00241852	0.00288217	0.00259151	0.00253277
	0.0570674	0.00282429	0.00319626	0.00241203	0.00318754	0.00204956	0.00272242	0.00261373	0.00270127
	0.0572772	0.00287232	0.00342272	0.00284446	0.00239868	0.0017663	0.0028817	0.00277574	0.00254908
	0.057487	0.00276111	0.00317346	0.00257878	0.00273055	0.00187999	0.00243606	0.00254621	0.00241501
	0.0576968	0.00285009	0.00298945	0.00202955	0.00234068	0.00183487	0.00256649	0.00240933	0.00232396
	0.0579066	0.00244937	0.00312768	0.0016685	0.00239529	0.00202548	0.00216307	0.00217412	0.00214411
	0.0581164	0.00282194	0.00309059	0.00176182	0.00231439	0.00167578	0.00205935	0.00245356	0.00201479
	0.0583262	0.0027844	0.00290079	0.00168805	0.00246108	0.00168657	0.00203335	0.00223247	0.00203013
	0.058536	0.00254939	0.00264301	0.00219229	0.00241187	0.00141675	0.00199501	0.00218709	0.00187832
	0.0587458	0.00228308	0.00251125	0.00193042	0.00215524	0.00139391	0.00172928	0.002057	0.00210307
	0.0589556	0.00234269	0.00257724	0.00134348	0.00194174	0.00106668	0.00163245	0.00200749	0.00184537
	0.0591654	0.00199631	0.00213375	0.00136774	0.0019471	0.00112983	0.00158264	0.00186392	0.0016904
	0.0593752	0.00175928	0.00225817	0.0012949	0.00212959	0.00137351	0.00154104	0.00161041	0.00144012
	0.059585	0.00178808	0.0019777	0.00156606	0.00196265	0.00150562	0.00111688	0.00134562	0.00154998
	0.0597949	0.0019502	0.00171491	0.00114085	0.00160449	0.00107688	0.00129939	0.00142245	0.00126696
	0.0600047	0.00152081	0.00166822	0.00172401	0.00140028	0.00107573	0.00129268	0.00143631	0.00116163
	0.0602145	0.00140424	0.00126089	0.00129637	0.00127825	0.000775635	0.00139	0.00111959	0.00131162
	0.0604243	0.00142021	0.00151632	0.000908906	0.00156739	0.000934474	0.00112137	0.000898691	0.00131889
	0.0606341	0.00112222	0.00133896	0.000482487	0.00117132	0.000769108	0.00115763	0.000852147	0.00114036
	0.0608439	0.00113051	0.000974505	0.00111911	0.0012082	0.000833784	0.00103411	0.000958516	0.000826488
	0.0610537	0.000866577	0.00101756	0.00077631	0.00129546	0.000701817	0.000711672	0.000851896	0.000718707
	0.0612635	0.000622455	0.000651342	0.00026265	0.000758644	0.000439236	0.000748096	0.000728994	0.000771025
	0.0614733	0.00061763	0.000481807	0.000612464	0.000403485	0.000552383	0.000543965	0.000527382	0.00066082

## Sheet: Figure 2 Source Data
				FIGURE 2 C									FIGURE 2 D										FIGURE 2 E
			I1,1/I1,0	Twitch								I1,0	Twitch									d1,0	Twitch
Key		Frame No.	Time (ms)	M06_I1,1/I1,0	M12_I1,1/I1,0	M23_I1,1/I1,0	M24_I1,1/I1,0	Mean	SE		Frame No.	Time (ms)	M06_I1,0	M12_I1,0	M23_I1,0	M24_I1,0	Mean	SE			Frame No.	Time (ms)	M06_d1,0	M12_d1,0	M23_d1,0	M24_d1,0	Mean	SE
Rest		19	-18.5	0.395518	0.379097	0.382591	0.431	0.397051	0.0118542		19	-18.5	0.995587	0.995121	0.994325	0.999096	0.996032	0.00105398			19	-18.5	34.6916	34.9776	35.3036	35.324	35.0742	0.150209
Early Activation		20	-13.5	0.390026	0.377904	0.380657	0.417947	0.391634	0.00914684		20	-13.5	1.00056	0.990373	0.995619	1.00771	0.998565	0.0036897			20	-13.5	34.6878	34.9781	35.2866	35.3128	35.0663	0.147307
Isometric Rerlaxation		21	-8.5	0.396708	0.372348	0.377531	0.413525	0.390028	0.00942292		21	-8.5	1.00263	1.01232	0.997904	0.994875	1.00193	0.00381174			21	-8.5	34.6912	34.9843	35.2966	35.3374	35.0774	0.150969
Chaotic Relaxation		22	-3.5	0.394567	0.378653	0.377671	0.429975	0.395217	0.0122161		22	-3.5	1.00123	1.00219	1.01215	0.99832	1.00347	0.00300782			22	-3.5	34.7018	34.9926	35.2996	35.3204	35.0786	0.14625
Peak Force		23	1.5	0.409794	0.401358	0.414458	0.442905	0.417129	0.00900955		23	1.5	0.992141	0.996317	0.983308	0.974911	0.986669	0.00476594			23	1.5	34.713	35.0077	35.4324	35.3315	35.1211	0.163445
Mechanically Relaxed		24	6.5	0.661876	0.761588	0.810051	0.820923	0.76361	0.0362807		24	6.5	0.80623	0.6363	0.72274	0.652633	0.704476	0.0387547			24	6.5	34.7686	35.1506	35.855	35.7194	35.3734	0.252838
		25	11.5	0.809225	0.926955	0.97345	1.01425	0.93097	0.0443261		25	11.5	0.763376	0.567503	0.53111	0.409252	0.56781	0.0734472			25	11.5	34.8055	35.1981	35.7258	35.8587	35.397	0.243379
		26	16.5	0.788759	0.92624	0.970623	1.03852	0.931036	0.0527462		26	16.5	0.761644	0.510225	0.612354	0.434983	0.579801	0.070675			26	16.5	34.8574	35.3062	35.7608	35.9675	35.473	0.247353
		27	21.5	0.744408	0.80913	0.854852	0.860207	0.817149	0.026819		27	21.5	0.759654	0.598812	0.639687	0.537089	0.63381	0.0469495			27	21.5	34.9868	35.4299	35.9248	36.0205	35.5905	0.239253
		28	26.5	0.622271	0.736513	0.669068	0.716529	0.686095	0.0255466		28	26.5	0.786312	0.587905	0.7656	0.650046	0.697466	0.0472478			28	26.5	35.1923	35.5848	35.8541	36.1273	35.6896	0.199363
		29	31.5	0.542448	0.622917	0.592039	0.611919	0.592331	0.0178129		29	31.5	0.838466	0.675953	0.832353	0.649523	0.749074	0.0501526			29	31.5	35.2956	35.6292	35.9574	36.0557	35.7345	0.172367
		30	36.5	0.493594	0.542342	0.499339	0.513986	0.512316	0.0108907		30	36.5	0.886892	0.727688	0.915078	0.762782	0.82311	0.0458904			30	36.5	35.3152	35.5988	35.8266	35.7725	35.6283	0.115105
		31	41.5	0.475918	0.501796	0.431207	0.480684	0.472401	0.014838		31	41.5	0.910082	0.806274	0.976093	0.828401	0.880213	0.0389836			31	41.5	35.2796	35.5179	35.5654	35.5806	35.4859	0.0700302
		32	46.5	0.541479	0.457045	0.395449	0.441316	0.458822	0.0304931		32	46.5	0.947278	0.888858	0.983221	0.900976	0.930083	0.0217296			32	46.5	35.2115	35.3606	35.4599	35.4259	35.3645	0.0550007
		33	51.5	0.440952	0.440614	0.393761	0.430643	0.426492	0.0111694		33	51.5	0.966098	0.932881	0.985696	0.919787	0.951115	0.0150948			33	51.5	35.1601	35.2647	35.4725	35.3205	35.3045	0.065139
		34	56.5	0.437942	0.41571	0.394478	0.417833	0.416491	0.00888411		34	56.5	0.991328	0.958106	0.993789	0.927326	0.967637	0.0157082			34	56.5	35.1518	35.2143	35.5214	35.2851	35.2931	0.0808188
		35	61.5	0.440205	0.415865	0.401314	0.424211	0.420399	0.00812201		35	61.5	0.999762	0.978697	1.0128	0.930207	0.980366	0.0181353			35	61.5	35.1337	35.2084	35.5856	35.3041	35.3079	0.0988929
		36	66.5	0.435566	0.408438	0.416722	0.426418	0.421786	0.00588199		36	66.5	1.00189	0.98547	1.01887	0.935368	0.9854	0.0180176			36	66.5	35.149	35.2179	35.6291	35.3232	35.3298	0.105995
		37	71.5	0.442512	0.410697	0.407846	0.430434	0.422872	0.00825083		37	71.5	1.00759	0.989791	1.01906	0.943223	0.989916	0.016688			37	71.5	35.1594	35.2162	35.6238	35.3716	35.3428	0.103869
		38	76.5	0.441539	0.396522	0.411216	0.428592	0.419467	0.00985286		38	76.5	0.991415	0.989571	1.02682	0.948203	0.989003	0.0160755			38	76.5	35.1627	35.2245	35.6543	35.3909	35.3581	0.109871
		39	81.5	0.449307	0.410339	0.413396	0.432727	0.426442	0.00909129		39	81.5	0.984601	0.993164	1.00402	0.983949	0.991433	0.00469069			39	81.5	35.1797	35.2344	35.6399	35.4276	35.3704	0.104376
		40	86.5	0.449945	0.411261	0.421542	0.440533	0.43082	0.00879756		40	86.5	0.983102	0.988692	1.00043	0.99384	0.991516	0.00369278			40	86.5	35.1682	35.2337	35.633	35.4438	35.3697	0.105645
		41	91.5	0.443864	0.411084	0.401446	0.434516	0.422727	0.00989195		41	91.5	0.981643	0.984939	0.994203	0.999389	0.990044	0.00409537			41	91.5	35.1745	35.2379	35.6447	35.4881	35.3863	0.109554
		42	96.5	0.446463	0.41475	0.41232	0.43595	0.427371	0.00828625		42	96.5	0.985085	0.983544	0.988008	1.00476	0.99035	0.00489259			42	96.5	35.1683	35.2487	35.6416	35.4792	35.3845	0.108108
				FIGURE 2 C									FIGURE 2 D										FIGURE 2 E
			I1,1/I1,0	Tetanus								I1,0	Tetanus									d1,0	Tetanus
	Frame No.	Time (ms)	M05_I1,1/I1,0	M10_I1,1/I1,0	M11_I1,1/I1,0	M23_I1,1/I1,0	M24_I1,1/I1,0	Mean	SE		Frame No.	Time (ms)	M05_I1,0	M10_I1,0	M11_I1,0	M23_I1,0_I1,0	M24_I1,0	Mean	SE		Frame No.	Time (ms)	M05_d1,0	M10_d1,0	M11_d1,0	M23_d1,0	M24_d1,0	Mean	SE
	19	-18.5	0.421158	0.416153	0.40976	0.353439	0.449524	0.410007	0.0156904		19	-18.5	0.989477	1.00285	0.984521	0.985128	0.998918	0.992179	0.00370805		19	-18.5	35.3034	34.9592	35.243	35.4105	35.6473	35.3127	0.112119
	20	-13.5	0.440324	0.422306	0.415905	0.347332	0.448284	0.41483	0.0178636		20	-13.5	1.00768	1.00054	1.01676	0.998503	1.00997	1.00669	0.00330074		20	-13.5	35.3172	34.9692	35.2405	35.4322	35.6796	35.3277	0.1164
	21	-8.5	0.420822	0.419435	0.406316	0.355838	0.449204	0.410323	0.0153128		21	-8.5	0.9981	1.00301	1.0067	0.994116	0.992705	0.998928	0.00264328		21	-8.5	35.2993	34.9595	35.2232	35.4111	35.6658	35.3118	0.115609
	22	-3.5	0.432436	0.414185	0.408	0.349777	0.428807	0.406641	0.0149147		22	-3.5	1.00474	0.993596	0.992019	1.02225	0.998412	1.0022	0.00548001		22	-3.5	35.3086	34.9595	35.2516	35.4157	35.6592	35.3189	0.11379
	23	1.5	0.442062	0.445241	0.436011	0.375188	0.469574	0.433615	0.0156828		23	1.5	0.993845	0.980471	0.95962	1.01932	0.980802	0.986812	0.00980371		23	1.5	35.3174	34.9834	35.3364	35.5242	35.6966	35.3716	0.119116
	24	6.5	0.674594	0.714818	0.75252	0.821694	0.90849	0.774423	0.0413563		24	6.5	0.898784	0.879779	0.814611	0.795303	0.699222	0.81754	0.0353387		24	6.5	35.8645	35.0786	35.6511	35.7212	36.1062	35.6843	0.170258
	25	11.5	0.951005	1.00097	1.07403	1.31636	1.6026	1.18899	0.120934		25	11.5	0.787999	0.79151	0.718566	0.55675	0.432852	0.657535	0.0704751		25	11.5	36.0678	35.3227	35.8767	35.6124	36.2986	35.8357	0.170709
	26	16.5	1.22867	1.22876	1.25313	1.60439	1.9532	1.45363	0.143818		26	16.5	0.717276	0.67712	0.678689	0.449177	0.300385	0.56453	0.081277		26	16.5	36.3469	35.5417	35.9254	35.7411	36.4621	36.0034	0.17556
	27	21.5	1.42751	1.36241	1.44248	1.64618	2.1462	1.60496	0.143416		27	21.5	0.672896	0.632081	0.643046	0.480089	0.301319	0.545886	0.0696933		27	21.5	36.3997	35.6212	36.0169	35.7448	36.5106	36.0586	0.174959
	28	26.5	1.52744	1.42067	1.5356	1.83435	2.26949	1.71751	0.154217		28	26.5	0.643598	0.625291	0.617211	0.459216	0.292924	0.527648	0.0673714		28	26.5	36.4447	35.6257	36.0297	35.7835	36.5486	36.0865	0.18017
	29	31.5	1.56667	1.53074	1.48022	1.89907	2.31558	1.75846	0.157514		29	31.5	0.658193	0.585166	0.624166	0.432719	0.287303	0.51751	0.0692565		29	31.5	36.4637	35.5765	35.9388	35.8743	36.414	36.0535	0.168966
	30	36.5	1.69919	1.51359	1.54729	1.87228	2.38445	1.80336	0.158556		30	36.5	0.614909	0.586108	0.610378	0.43783	0.277797	0.505404	0.0655344		30	36.5	36.4917	35.5323	35.9491	35.8685	36.421	36.0525	0.179432
	31	41.5	1.6639	1.53184	1.57332	1.93193	2.38024	1.81624	0.157254		31	41.5	0.621167	0.572671	0.588029	0.423362	0.26733	0.494512	0.0661702		31	41.5	36.43	35.4483	35.8527	35.815	36.2302	35.9553	0.171485
	32	46.5	1.67394	1.52087	1.57325	1.92117	2.26157	1.79016	0.136467		32	46.5	0.610259	0.565424	0.577829	0.416841	0.272468	0.488564	0.0634536		32	46.5	36.3802	35.3701	35.7699	35.8208	36.1803	35.9043	0.175085
	33	51.5	1.77036	1.52652	1.58545	1.96957	2.29412	1.8292	0.139704		33	51.5	0.581387	0.568292	0.588034	0.41302	0.268197	0.483786	0.0628574		33	51.5	36.3869	35.3545	35.7393	35.8044	36.1706	35.8911	0.179224
	34	56.5	1.71286	1.51554	1.53253	1.90503	2.31843	1.79688	0.14829		34	56.5	0.598018	0.554377	0.598814	0.416159	0.263304	0.486134	0.0649698		34	56.5	36.2868	35.2663	35.6991	35.7512	36.1013	35.8209	0.176488
	35	61.5	1.7428	1.4645	1.58857	1.90393	2.27676	1.79531	0.14116		35	61.5	0.584518	0.558676	0.585285	0.420285	0.268422	0.483437	0.0618348		35	61.5	36.265	35.2303	35.6265	35.727	36.0706	35.7839	0.180012
	36	66.5	1.6907	1.47643	1.54399	1.95291	2.1157	1.75595	0.121559		36	66.5	0.591742	0.55354	0.589586	0.413155	0.276911	0.484987	0.0614381		36	66.5	36.2261	35.2519	35.6268	35.718	36.0621	35.777	0.170984
	37	71.5	1.69367	1.47217	1.51065	1.94363	2.39847	1.80372	0.170474		37	71.5	0.581913	0.559518	0.588658	0.410424	0.249121	0.477927	0.065818		37	71.5	36.1359	35.1981	35.5836	35.6945	36.0578	35.734	0.169952
	38	76.5	1.68835	1.44365	1.53474	1.91243	2.1116	1.73815	0.12256		38	76.5	0.587161	0.554082	0.567241	0.412393	0.272074	0.47859	0.0601568		38	76.5	36.157	35.1712	35.5275	35.6963	35.9504	35.7005	0.170441
	39	81.5	1.72077	1.47484	1.52701	1.92782	2.27336	1.78476	0.145907		39	81.5	0.57929	0.547635	0.567651	0.408343	0.259436	0.472471	0.061488		39	81.5	36.1657	35.1713	35.5642	35.7479	36.0344	35.7367	0.176382
	40	86.5	1.66269	1.46358	1.51947	1.88044	2.41205	1.78765	0.171908		40	86.5	0.581761	0.541792	0.571674	0.414385	0.255154	0.472953	0.062125		40	86.5	36.0838	35.0934	35.5306	35.6875	36.0128	35.6816	0.178916
	41	91.5	1.76668	1.48221	1.48895	1.97818	2.28434	1.80007	0.152511		41	91.5	0.569978	0.538629	0.588508	0.398311	0.256501	0.470385	0.0630357		41	91.5	36.161	35.1312	35.5147	35.7456	35.9399	35.6985	0.177477
	42	96.5	1.69492	1.41313	1.52237	1.96852	2.19935	1.75966	0.144487		42	96.5	0.574056	0.559542	0.571568	0.395276	0.269749	0.474038	0.0611409		42	96.5	36.0915	35.1576	35.5338	35.7618	35.9932	35.7076	0.168023
	43	101.5	1.69052	1.4214	1.49587	1.90504	2.2416	1.75089	0.148627		43	101.5	0.574437	0.551721	0.583399	0.396262	0.251931	0.47155	0.0645848		43	101.5	36.0733	35.0811	35.4825	35.6523	35.9485	35.6475	0.176056
	44	106.5	1.74082	1.44917	1.43887	1.94342	2.13506	1.74147	0.13651		44	106.5	0.559385	0.545821	0.586674	0.39457	0.26977	0.471244	0.0604671		44	106.5	36.1214	35.1251	35.4957	35.6953	35.9903	35.6856	0.177928
	45	111.5	1.64767	1.36366	1.41602	1.84314	2.29156	1.71241	0.168251		45	111.5	0.569117	0.552333	0.583406	0.406451	0.248953	0.472052	0.064165		45	111.5	35.9706	35.041	35.4172	35.5985	35.8377	35.573	0.163723
	46	116.5	1.4978	1.31218	1.33137	1.73762	2.03132	1.58206	0.135797		46	116.5	0.583858	0.564679	0.581263	0.415004	0.265418	0.482044	0.0626339		46	116.5	35.8681	35.0075	35.2888	35.4976	35.838	35.5	0.16384
	47	121.5	1.38309	1.21949	1.24306	1.52955	1.82876	1.44079	0.111759		47	121.5	0.595573	0.582221	0.577741	0.416422	0.282777	0.490947	0.0615222		47	121.5	35.8141	34.9718	35.2869	35.587	35.8143	35.4948	0.162672
	48	126.5	1.20538	1.14983	1.07762	1.26065	1.63337	1.26537	0.0968609		48	126.5	0.645122	0.620907	0.614244	0.504606	0.342149	0.545406	0.0562852		48	126.5	36.0897	35.2296	35.7209	35.9952	36.3516	35.8774	0.190773
	49	131.5	1.0568	1.04799	0.889739	1.02094	1.29295	1.06168	0.0651614		49	131.5	0.649935	0.68559	0.673103	0.576913	0.447807	0.606669	0.0439526		49	131.5	36.5219	35.6102	36.023	36.2784	36.7048	36.2277	0.192354
	50	136.5	0.828155	0.880199	0.712304	0.79414	1.00641	0.844242	0.0488711		50	136.5	0.724332	0.75906	0.726228	0.692926	0.520094	0.684528	0.0424189		50	136.5	36.5853	35.76	36.0078	36.3478	36.7754	36.2952	0.185284
	51	141.5	0.648459	0.714974	0.579581	0.682457	0.669616	0.659017	0.0225992		51	141.5	0.79631	0.814747	0.790999	0.789737	0.68501	0.775361	0.0230269		51	141.5	36.2801	35.7041	35.8783	36.2883	36.4324	36.1166	0.138355
	52	146.5	0.579998	0.642476	0.520804	0.601046	0.553652	0.579595	0.0206685		52	146.5	0.816922	0.85098	0.816829	0.875695	0.798008	0.831687	0.013932		52	146.5	36.1714	35.7137	35.8226	36.2898	36.1557	36.0306	0.110998
	53	151.5	0.55389	0.588966	0.486613	0.52099	0.506123	0.531316	0.0181284		53	151.5	0.87552	0.892093	0.836517	0.957919	0.874623	0.887334	0.01986		53	151.5	36.0871	35.7935	35.7325	36.1259	36.1191	35.9716	0.0859519
	54	156.5	0.532927	0.570655	0.492948	0.477148	0.520318	0.518799	0.0162696		54	156.5	0.901615	0.898861	0.845739	1.00782	0.897401	0.910288	0.0265061		54	156.5	36.0136	35.8424	35.7113	36.0044	36.0971	35.9337	0.0692416
	55	161.5	0.538563	0.560289	0.494816	0.428633	0.520318	0.508524	0.0226843		55	161.5	0.912753	0.882591	0.882971	1.01912	0.897401	0.918968	0.0256456		55	161.5	36.0119	35.8343	35.7294	35.9635	36.0971	35.9272	0.0652279
	56	166.5	0.521411	0.55016	0.497533	0.443504	0.520318	0.506585	0.0178442		56	166.5	0.907942	0.87487	0.921456	0.979459	0.897401	0.916226	0.0175486		56	166.5	35.9668	35.7428	35.7351	35.9633	36.0971	35.901	0.0704379
	57	171.5	0.520841	0.549057	0.490512	0.433747	0.500608	0.498953	0.019125		57	171.5	0.939526	0.844639	0.94259	0.958068	0.936876	0.92434	0.0202616		57	171.5	35.987	35.645	35.7278	35.9732	36.095	35.8856	0.085026
	58	176.5	0.527578	0.540981	0.492909	0.42187	0.524718	0.501611	0.0214388		58	176.5	0.915133	0.854127	0.951821	0.995363	0.930096	0.929308	0.0231558		58	176.5	35.9629	35.5953	35.7292	35.9836	36.1071	35.8756	0.0929732
	59	181.5	0.533955	0.536761	0.515419	0.437569	0.49867	0.504475	0.018085		59	181.5	0.925043	0.846481	0.959641	1.0073	0.922242	0.932141	0.0263544		59	181.5	35.9831	35.5822	35.7944	35.9792	36.089	35.8856	0.0894338
	60	186.5	0.524504	0.539056	0.531314	0.431244	0.514677	0.508159	0.0196423		60	186.5	0.909202	0.878499	0.908428	1.04529	0.921994	0.932684	0.0290439		60	186.5	35.9753	35.586	35.832	36.0247	36.0833	35.9003	0.0888821
	61	191.5	0.539272	0.543988	0.526407	0.45143	0.507803	0.51378	0.0168004		61	191.5	0.912903	0.893971	0.910449	1.01882	0.919593	0.931147	0.022319		61	191.5	35.9906	35.5977	35.8591	36.0224	36.0979	35.9135	0.0878838
	62	196.5	0.531632	0.542557	0.532766	0.462826	0.514624	0.516881	0.0142411		62	196.5	0.895219	0.905356	0.899845	1.04212	0.943081	0.937124	0.0275812		62	196.5	35.9953	35.6095	35.8449	36.0461	36.1168	35.9225	0.0900938
	63	201.5	0.536568	0.552249	0.532404	0.457223	0.50659	0.517007	0.0166499		63	201.5	0.904674	0.905915	0.910253	1.0408	0.954099	0.943149	0.0260818		63	201.5	35.9838	35.6184	35.8615	36.0785	36.1225	35.9329	0.0904834
	64	206.5	0.529292	0.541183	0.520718	0.446102	0.51188	0.509835	0.0166521		64	206.5	0.925273	0.920337	0.921907	1.01486	0.951253	0.946726	0.0179375		64	206.5	36.0051	35.6276	35.8632	36.0867	36.1249	35.9415	0.0904036
	65	211.5	0.522936	0.535786	0.52295	0.449947	0.514863	0.509296	0.0152109		65	211.5	0.90956	0.925631	0.934232	1.02561	0.931251	0.945257	0.0205356		65	211.5	35.9882	35.6213	35.8755	36.0874	36.1597	35.9464	0.0943079
	66	216.5	0.530102	0.541884	0.525811	0.466452	0.496818	0.512213	0.0136315		66	216.5	0.919007	0.911366	0.903869	0.998308	0.956143	0.937739	0.017608		66	216.5	35.9914	35.6363	35.8929	36.098	36.147	35.9531	0.0905734
	67	221.5	0.517399	0.529364	0.540385	0.450952	0.510794	0.509779	0.0155563		67	221.5	0.922328	0.916615	0.905588	1.018	0.946295	0.941765	0.0201886		67	221.5	35.9909	35.6463	35.9147	36.1141	36.1277	35.9587	0.0875315
	68	226.5	0.527533	0.537592	0.521435	0.424093	0.527515	0.507634	0.0210455		68	226.5	0.921335	0.909455	0.906423	1.02664	0.941578	0.941085	0.0222611		68	226.5	36.002	35.6462	35.9381	36.1266	36.1888	35.9803	0.0945324
