# Supplementary material for: Myosin-based regulation of twitch and tetanic contractions in mammalian skeletal muscle
Source: eLife. 2021 Jun 14;10:e68211. doi: 10.7554/eLife.68211 (PMC8275128; doi:10.7554/eLife.68211)
Supplement: Figure 3—source data 1. [file elife-68211-fig3-data1.xlsx]

## Sheet: 1D Profiles - ML1 & AL1
		Rest		Early Activation		Peak Force		Mechanically Relaxed
Key	Reciprocal Spacing (nm-1)	Mean Twitch Intensity	Mean Tetanus Intensity	Mean Twitch Intensity	Mean Tetanus Intensity	Mean Twitch Intensity	Mean Tetanus Intensity	Mean Twitch Intensity	Mean Tetanus Intensity
Rest	0.0165747	0	2.24515e-05	0	0	6.11309e-05	9.775e-08	2.55774e-05	3.46761e-05
Early Activation	0.0167845	5.40256e-05	3.86675e-06	3.94611e-05	0.000180787	3.71508e-05	1.35006e-05	4.22726e-05	5.15573e-05
Peak Force	0.0169943	0.000122197	0	2.74162e-05	8.22479e-05	3.56617e-05	1.76545e-05	3.51508e-05	6.63574e-05
Mechanically Relaxed	0.0172041	0.000104075	5.99574e-05	0.000165649	0.000174026	8.19456e-05	3.50864e-05	2.3345e-05	4.51875e-05
	0.0174139	9.31402e-05	1.64198e-05	0.000106217	0.000116463	8.35715e-05	9.77725e-06	4.60812e-05	6.73027e-05
	0.0176237	9.12038e-05	6.56157e-07	0.000136767	0.000126913	6.76664e-05	1.28501e-05	5.84684e-05	0.000121304
	0.0178336	0.000122973	5.39655e-05	0.000153905	0.000145177	6.14263e-07	1.905e-05	2.55496e-05	9.44259e-05
	0.0180434	0.000119702	7.74219e-05	8.29276e-05	0.000180405	5.18772e-05	4.39209e-05	6.37278e-05	9.2416e-05
	0.0182532	0.000152371	7.91663e-05	8.53176e-05	0.000207173	7.39751e-05	2.38477e-05	7.9135e-05	0.000110735
	0.018463	0.000137019	0.000109915	6.96787e-05	0.000105212	7.08359e-05	7.43566e-05	8.76832e-05	0.000134125
	0.0186728	0.000118581	0.000117982	0.000122275	0.000136086	3.41578e-05	5.74325e-05	8.65214e-05	0.000155212
	0.0188826	0.000167052	0.000110518	0.000128398	0.000167162	3.13257e-05	6.68134e-05	6.94686e-05	0.000134515
	0.0190924	0.000157856	0.000122948	0.000102933	0.000202405	5.56036e-05	7.28763e-05	0.000124674	0.000161116
	0.0193022	0.00021435	0.00017802	0.000113843	0.000343177	0.000116099	5.29941e-05	0.000175038	0.000197855
	0.019512	0.000213988	0.000198904	0.000186425	0.000200091	8.72884e-05	0	0.000181101	0.0002
	0.0197218	0.000247477	0.000243118	0.000293425	0.000246818	6.31533e-05	4.03256e-05	0.000264978	0.000272635
	0.0199316	0.000303099	0.000273134	0.000155937	0.000198741	9.51132e-05	7.20341e-05	0.000259259	0.000271795
	0.0201414	0.000303575	0.000315111	0.000285021	0.000200113	8.81171e-05	7.78487e-05	0.000309951	0.000320929
	0.0203512	0.000356595	0.000350349	0.000177548	0.000309577	9.5575e-05	6.69612e-05	0.000318869	0.000372358
	0.020561	0.000423048	0.000406611	0.000283485	0.000377608	0.000148239	4.14868e-05	0.000348064	0.000379676
	0.0207708	0.000426821	0.000521919	0.000310167	0.000309	0.000204527	6.65973e-05	0.00037917	0.000402611
	0.0209807	0.000519081	0.000492314	0.000335217	0.000360868	0.000119619	6.94229e-05	0.000442412	0.000460656
	0.0211905	0.000509239	0.000522533	0.000381889	0.000380274	0.000199634	6.48334e-05	0.000456326	0.000462351
	0.0214003	0.000614508	0.00061837	0.000305355	0.000421736	0.000225347	8.2266e-05	0.000537649	0.00055714
	0.0216101	0.000701	0.000643287	0.000357565	0.000404373	0.000240871	0.000114798	0.000601773	0.00053733
	0.0218199	0.000723859	0.000715899	0.00038442	0.000360119	0.000251634	7.64461e-05	0.000563315	0.000616346
	0.0220297	0.000760315	0.000785509	0.000430795	0.000502102	0.000241699	8.79866e-05	0.000604832	0.000609826
	0.0222395	0.000789432	0.00078304	0.000375283	0.000586845	0.000266976	0.000116509	0.000681519	0.000646569
	0.0224493	0.000877223	0.000849538	0.000423214	0.000568907	0.000279155	0.000109024	0.000762071	0.000700855
	0.0226591	0.000947584	0.000877743	0.000374883	0.000562233	0.000333602	0.000111346	0.000784868	0.000680702
	0.0228689	0.000968323	0.000931043	0.000467146	0.000597631	0.000359633	0.000138201	0.000784654	0.000678414
	0.0230787	0.00095086	0.000948232	0.000525466	0.000612008	0.000322892	0.000162893	0.000771799	0.000702868
	0.0232885	0.000968453	0.000983537	0.000516305	0.000571677	0.000313802	0.000174589	0.000849485	0.000730529
	0.0234983	0.000978543	0.000955318	0.000498809	0.000558231	0.000282611	0.00018647	0.000872941	0.000741695
	0.0237081	0.000977352	0.000972802	0.000440326	0.000639834	0.000297188	0.000194911	0.00085319	0.000755616
	0.0239179	0.000976928	0.000965104	0.000440773	0.000535723	0.000251188	0.000188228	0.000889194	0.000723793
	0.0241277	0.000920035	0.000929132	0.000503026	0.000582796	0.000239829	0.000159328	0.000767985	0.000743195
	0.0243376	0.000871594	0.000927186	0.000510516	0.000561875	0.000270899	0.000211909	0.000753582	0.000704121
	0.0245474	0.00084923	0.000842364	0.000356011	0.000459253	0.000245933	0.000201551	0.000755329	0.000675776
	0.0247572	0.000829213	0.000816031	0.000468462	0.000533969	0.000225177	0.000206314	0.000672661	0.000626028
	0.024967	0.000800954	0.00076895	0.00042506	0.000531152	0.000244432	0.000232091	0.000669554	0.000591169
	0.0251768	0.000731668	0.000693364	0.000401428	0.000508597	0.000305811	0.000232222	0.000566767	0.00056062
	0.0253866	0.000648618	0.000638126	0.000403237	0.000354711	0.000265966	0.000281944	0.000599897	0.00052979
	0.0255964	0.000639045	0.000568559	0.000308987	0.000407045	0.000254451	0.00026375	0.000542967	0.000463286
	0.0258062	0.000563496	0.000523041	0.000271156	0.000345592	0.00022291	0.000273057	0.000480583	0.000444363
	0.026016	0.00051169	0.000457337	0.00031474	0.000353409	0.000222826	0.000272454	0.000484006	0.000400908
	0.0262258	0.000493021	0.000424336	0.000389228	0.000386261	0.000214623	0.000344635	0.000419013	0.000372734
	0.0264356	0.000464831	0.000421304	0.000365655	0.000262165	0.000268096	0.000331902	0.000395615	0.000302842
	0.0266454	0.000424589	0.000371852	0.000301476	0.000299722	0.000245715	0.00032991	0.000343605	0.000273501
	0.0268552	0.000455388	0.000328213	0.000299231	0.000145789	0.000178057	0.000272516	0.000339219	0.000318596
	0.027065	0.000372617	0.000312258	0.000196649	0.000233889	0.00015906	0.000314437	0.0002961	0.000328691
	0.0272748	0.000356219	0.000286581	0.000224659	0.000220176	0.00012022	0.000310202	0.000279941	0.000241148
	0.0274847	0.000294279	0.000247353	0.000199811	0.000233534	0.000210188	0.000311841	0.000245967	0.000235388
	0.0276945	0.000304561	0.00022297	0.000122312	0.000206726	0.000214201	0.000320862	0.000228943	0.000209793
	0.0279043	0.000229757	0.000225743	0.000165058	0.000251003	0.00015266	0.000288965	0.000227147	0.000194219
	0.0281141	0.000218986	0.000215992	0.000163875	0.000202528	0.000159458	0.00022101	0.000198141	0.00016901
	0.0283239	0.000249997	0.000180362	0.000181474	9.36632e-05	0.000102026	0.000204739	0.000181542	0.000148628
	0.0285337	0.000219999	0.000148059	0.000157709	0.000112649	0.000114695	0.000195165	0.000134468	0.000139629
	0.0287435	0.000175717	0.000159266	0.000252942	0.000145917	0.000111634	0.000211186	0.000115136	0.000132264
	0.0289533	0.000188711	0.000164674	0.000216106	7.69505e-05	0.000102809	0.000195666	0.000116661	0.000155456
	0.0291631	0.00013731	0.000139614	0.000181579	0.000121532	4.49226e-05	0.000158178	0.000111563	0.00013316
	0.0293729	0.000131807	6.79138e-05	7.02419e-05	4.47544e-05	6.85035e-05	0.000185473	0.000111783	0.000108183
	0.0295827	0.00013818	8.62471e-05	0.000104521	4.36088e-05	6.67444e-05	0.00016191	0.000110689	7.86852e-05
	0.0297925	0.00013834	7.25625e-05	9.35251e-05	0.000175996	6.41033e-05	0.000149051	9.2186e-05	7.25533e-05
	0.0300023	0.000133194	6.04399e-05	3.00491e-05	0.000167945	5.90702e-05	0.000118037	3.68842e-05	9.34615e-05
	0.0302121	0.000112243	8.39823e-05	5.30322e-05	0.000159965	3.50291e-05	6.67711e-05	6.44704e-05	6.89486e-05
	0.0304219	6.90296e-05	7.52517e-05	9.98743e-05	0.000119269	7.23149e-05	5.89487e-05	5.84446e-05	5.90287e-05
	0.0306318	6.70651e-05	7.18051e-05	9.39624e-05	0.000118719	9.05708e-05	8.88422e-05	2.39588e-05	4.30939e-05
	0.0308416	8.54977e-05	2.57175e-05	0.000179804	7.49954e-05	5.13647e-05	7.07778e-05	2.4796e-05	3.9829e-05
	0.0310514	9.09202e-05	1.97488e-05	0.000166498	0.000137892	8.02936e-05	6.58673e-05	2.28412e-05	3.54321e-05
	0.0312612	7.16758e-05	4.42652e-05	9.29356e-05	4.77433e-05	9.18325e-05	9.39929e-05	6.26304e-05	4.49423e-05
	0.031471	6.53123e-05	5.56726e-05	0.000107361	9.55637e-05	8.19184e-05	3.71794e-05	9.13556e-05	4.59264e-05
	0.0316808	2.19419e-05	0	6.61478e-05	7.65312e-05	4.76513e-05	5.1649e-05	6.97158e-05	4.24935e-05
	0.0318906	6.07975e-05	2.54868e-05	0.000163968	4.67866e-05	6.70202e-05	5.52226e-05	2.7264e-05	5.25497e-05
	0.0321004	3.8091e-05	3.74447e-05	0.000138072	6.4912e-05	3.76651e-05	6.71961e-05	5.26232e-05	6.15258e-05
	0.0323102	5.59916e-05	7.96475e-05	0.000108328	7.49535e-05	4.2065e-05	1.69297e-05	5.69394e-05	3.30099e-05
	0.03252	5.55051e-05	3.83433e-05	0.000144351	9.14499e-05	2.73799e-05	4.24572e-05	2.82836e-05	7.50304e-06
	0.0327298	5.47557e-05	1.64812e-05	0.000112408	8.50123e-05	9.77579e-06	6.96298e-05	5.61618e-05	2.13472e-05
	0.0329396	6.00702e-05	0	3.87173e-05	8.19128e-05	5.31187e-05	7.99883e-05	0	3.02413e-05

## Sheet: Figure 3 Source Data
				FIGURE 2 C										FIGURE 2 D
Key			IAL1	Twitch									IML1	Twitch
Rest		Frame No.	Time (ms)	M06_IAL1	M12_IAL1	M23_IAL1	M24_IAL1	Mean	SE			Frame No.	Time (ms)	M06_IML1	M12_IML1	M23_IML1	M24_IML1	Mean	SE
Early Activation		19	-18.5	0.789872	0.808422	1.05048	1.08515	0.933479	0.0779708			19	-18.5	1.01878	1.00928	1.00024	1.02297	1.01282	0.00507704
Peak Force		20	-13.5	1.25263	1.57348	1.42842	1.51562	1.44254	0.0699696			20	-13.5	0.991153	0.964253	0.971523	1.03935	0.991569	0.0169085
Isometric Relaxation		21	-8.5	0.873297	0.733748	0.911007	0.874332	0.848096	0.0391118			21	-8.5	0.997387	1.0139	1.08646	1.04841	1.03654	0.0197445
Chaotic Relaxation		22	-3.5	1.0842	0.884353	0.6101	0.524905	0.775889	0.128224			22	-3.5	0.992684	1.01256	0.941779	0.889271	0.959075	0.0276322
Mechanically Relaxed		23	1.5	0.536519	0.813668	0.632884	1.16916	0.788059	0.139418			23	1.5	0.985949	0.98339	0.916455	0.980953	0.966687	0.016775
		24	6.5	0.438278	0.629218	0.511428	0.730477	0.57735	0.0644365			24	6.5	0.393756	0.349256	0.644794	0.453674	0.46037	0.0650902
		25	11.5	1.09365	0.934701	0.599124	0.276585	0.726015	0.181841			25	11.5	0.248259	0.238795	0.379441	0.204267	0.267691	0.0384309
		26	16.5	0.805144	0.277627	1.19453	0.769422	0.76168	0.187886			26	16.5	0.261533	0.28378	0.433622	0.226217	0.301288	0.0456756
		27	21.5	0.409191	0.658791	0.718008	1.16319	0.737296	0.156944			27	21.5	0.373545	0.310623	0.422202	0.474691	0.395265	0.0349642
		28	26.5	0.490624	0.622897	0.824088	1.10913	0.761684	0.134582			28	26.5	0.434079	0.432659	0.765449	0.494164	0.531588	0.0792603
		29	31.5	0.558701	0.244331	0.213842	1.20552	0.555597	0.230233			29	31.5	0.6303	0.49256	0.989272	0.648144	0.690069	0.105618
		30	36.5	0.995214	0.708228	0.626377	0.261821	0.64791	0.151048			30	36.5	0.691408	0.556352	0.989879	0.542065	0.694926	0.103914
		31	41.5	2.06165	0.619998	0.740738	1.12353	1.13648	0.326532			31	41.5	0.755045	0.695974	1.18769	0.579718	0.804608	0.132787
		32	46.5	0.890455	0.786117	1.68849	0.395757	0.940206	0.271198			32	46.5	0.818286	0.738052	0.75837	0.818705	0.783353	0.0207092
		33	51.5	0.334873	0.681787	1.07217	1.03418	0.780752	0.172663			33	51.5	0.819838	0.884383	0.908073	0.869497	0.870448	0.0186459
		34	56.5	0.68889	0.69654	1.32453	0.967554	0.91938	0.149793			34	56.5	0.949543	0.883269	0.87148	0.844788	0.88727	0.0222634
		35	61.5	1.16156	0.739953	1.19058	1.08108	1.04329	0.103732			35	61.5	0.919063	0.895353	0.847671	0.789443	0.862882	0.0286289
		36	66.5	0.972412	1.01862	1.88148	0.543053	1.10389	0.280437			36	66.5	0.894166	0.846589	0.943504	0.910969	0.898807	0.0201949
		37	71.5	1.92721	0.525111	1.22617	1.05332	1.18295	0.289446			37	71.5	1.0168	0.878881	0.933915	0.874646	0.926059	0.0331209
		38	76.5	1.48124	1.09979	1.69767	0.852397	1.28277	0.189348			38	76.5	1.01751	0.864957	0.945996	0.863162	0.922906	0.03698
		39	81.5	1.34421	0.998268	1.23762	0.8007	1.0952	0.121935			39	81.5	0.978948	0.864353	0.820725	0.852601	0.879157	0.0345169
		40	86.5	0.0958542	0.828247	1.4463	0.678241	0.76216	0.277401			40	86.5	0.889694	0.850598	0.783699	1.06523	0.897305	0.0601003
		41	91.5	1.22214	1.01628	1.02827	0.919459	1.04654	0.0634			41	91.5	0.971241	0.878799	0.892224	0.928205	0.917617	0.0206948
		42	96.5	1.48794	0.479138	0.589919	0.531982	0.772245	0.239636			42	96.5	0.948127	0.910261	1.07392	0.862287	0.94865	0.0453008
				FIGURE 2 C										FIGURE 2 D
			IAL1	Tetanus									IML1	Tetanus
		Frame No.	Time (ms)	M05_IAL1	M10_IAL1	M11_IAL1	M23_IAL1	M24_IAL1	Mean	SE		Frame No.	Time (ms)	M05_IML1	M10_IML1	M11__IML1	M23_IML1	M24_IML1	Mean	SE
		19	-18.5	1.45448	1.10116	1.40783	1.4228	0.886189	1.25449	0.112025		19	-18.5	0.949047	0.999148	1.00651	1.21606	1.0876	1.05167	0.0467135
		20	-13.5	0.98374	0.997107	0.978771	0.886526	0.710031	0.911235	0.0539841		20	-13.5	0.97344	1.00701	0.992905	0.939761	0.972906	0.977205	0.0113349
		21	-8.5	0.683811	0.704132	0.483141	0.770845	1.20293	0.768972	0.118634		21	-8.5	1.02896	1.01225	0.995699	0.903103	1.08889	1.00578	0.0301084
		22	-3.5	0.87797	1.1976	1.13026	0.91983	1.20085	1.0653	0.0694081		22	-3.5	1.04856	0.981592	1.00488	0.941079	0.850607	0.965343	0.0335446
		23	1.5	-0.536795	1.83811	0.0484692	1.042	1.80256	0.838868	0.473583		23	1.5	0.972069	0.907048	0.937043	1.09361	0.871241	0.956201	0.0381661
		24	6.5	0.898329	1.10203	0.401867	1.67437	1.03786	1.02289	0.203973		24	6.5	0.761867	0.461495	0.493444	0.942316	0.385483	0.608921	0.104771
		25	11.5	3.08262	1.2004	1.19912	0.917164	0.793684	1.4386	0.418611		25	11.5	0.446556	0.229633	0.205184	0.171885	0.12074	0.2348	0.0559966
		26	16.5	3.39635	1.95868	1.41327	1.40923	1.34572	1.90465	0.389062		26	16.5	0.335492	0.0640052	0.0795107	0.173255	-0.0698419	0.116484	0.0670916
		27	21.5	3.4607	2.68	2.71183	1.81963	0.880207	2.31047	0.441998		27	21.5	0.232783	0.0564621	0.207278	0.0132561	0.0354278	0.109041	0.0460004
		28	26.5	3.23739	3.34386	2.79626	2.75817	1.35699	2.69853	0.35494		28	26.5	0.125898	0.0701829	0.177386	0.138055	0.0558929	0.113483	0.0223976
		29	31.5	4.56248	3.11201	2.63578	2.68827	1.35506	2.87072	0.515072		29	31.5	0.200626	0.0259663	0.137593	-0.0473362	0.00728293	0.0648264	0.0453532
		30	36.5	5.10191	3.07719	3.11465	2.96203	1.11492	3.07414	0.631055		30	36.5	0.153078	0.0579744	0.179058	-0.074878	0.04026	0.0710985	0.045171
		31	41.5	2.72002	3.31834	3.39372	2.48629	0.713533	2.52638	0.485026		31	41.5	0.210147	0.0218271	0.0657219	0.242427	0.0526933	0.118563	0.0448435
		32	46.5	5.35561	3.09553	1.77096	1.94293	1.32726	2.69846	0.725581		32	46.5	0.172819	0.035279	0.132291	0.159991	0.0154434	0.103165	0.0325828
		33	51.5	5.23273	3.70646	3.29177	2.18841	1.4889	3.18165	0.646003		33	51.5	0.198587	0.0597983	0.140638	0.0647687	0.0291294	0.0985843	0.0310168
		34	56.5	3.8578	3.29666	3.66041	1.83098	1.01043	2.73126	0.557846		34	56.5	0.158271	0.0523605	0.245464	0.212527	0.0484872	0.143422	0.0404433
		35	61.5	5.18747	3.46707	2.01545	1.42729	1.11179	2.64181	0.753984		35	61.5	0.160079	0.0112571	0.20986	0.156752	0.0885677	0.125303	0.0344269
		36	66.5	4.08581	3.18446	2.25858	1.64031	2.11022	2.65587	0.436525		36	66.5	0.179578	0.0188175	0.124036	0.294925	-0.0276599	0.117939	0.057526
		37	71.5	3.7654	3.00298	2.08936	1.66153	2.46558	2.59697	0.366063		37	71.5	0.12369	0.036736	0.0626083	-0.119269	0.0932595	0.0394049	0.0422654
		38	76.5	4.42126	3.21866	2.74849	2.41936	1.35593	2.83274	0.501561		38	76.5	0.107085	0.0873895	0.202541	-0.00237489	0.0632829	0.0915847	0.0333155
		39	81.5	4.01356	3.12811	2.64735	1.19643	1.77322	2.55173	0.496046		39	81.5	0.163007	-0.0109985	0.174659	0.339299	-0.0360289	0.125987	0.0686497
		40	86.5	4.79332	3.15447	2.87231	2.01035	1.61295	2.88868	0.552156		40	86.5	0.176272	0.0619469	0.194662	0.0386789	-0.0493541	0.0844413	0.0453228
		41	91.5	4.01002	3.33511	3.06176	2.0438	1.48341	2.78682	0.454058		41	91.5	0.144115	0.0226171	0.0991511	0.0413355	0.0755075	0.0765452	0.0214776
		42	96.5	2.50655	3.36018	3.38576	1.72397	1.07271	2.40983	0.454051		42	96.5	0.157221	0.0062715	0.0958614	0.130229	0.0807752	0.0940718	0.025675
		43	101.5	4.43457	2.30652	2.22635	1.09253	0.967171	2.20543	0.622558		43	101.5	0.220476	0.0261406	0.194659	0.0109884	0.0703894	0.104531	0.0433747
		44	106.5	3.03617	3.50202	2.8318	1.29825	1.32563	2.39877	0.456821		44	106.5	0.124838	0.0159409	0.184325	0.12915	0.0510223	0.101055	0.0300305
		45	111.5	3.74405	2.6828	2.58994	2.59094	1.7454	2.67063	0.317906		45	111.5	0.168651	0.0633087	0.0912496	0.104254	0.091356	0.103764	0.0175467
		46	116.5	2.29517	2.18291	2.2491	1.43272	0.834548	1.79889	0.28814		46	116.5	0.162257	0.00293829	0.112638	-0.0656765	-0.0117468	0.040082	0.0420962
		47	121.5	2.92619	2.53886	2.31944	0.993761	1.42138	2.03993	0.359832		47	121.5	0.287196	0.032509	0.153539	0.108085	0.142808	0.144827	0.0414211
		48	126.5	1.75365	1.96783	1.52587	1.21469	0.750994	1.44261	0.213286		48	126.5	0.163968	0.0303409	0.217371	0.26558	0.150115	0.165475	0.0395054
		49	131.5	3.1156	1.29738	0.524322	1.11325	0.362414	1.28259	0.490434		49	131.5	0.22434	0.133391	0.258193	0.51119	0.198304	0.265083	0.0648375
		50	136.5	0.627837	0.737016	0.826848	1.02596	0.826825	0.808897	0.0654633		50	136.5	0.262861	0.222126	0.373877	0.57163	0.267239	0.339546	0.0632211
		51	141.5	0.565355	0.476441	0.03933	1.85511	0.53657	0.694561	0.305404		51	141.5	0.435251	0.434653	0.356464	1.04043	0.345181	0.522397	0.130881
		52	146.5	0.412251	1.23295	0.0660108	2.14071	0.160672	0.80252	0.392604		52	146.5	0.534789	0.524031	0.463108	0.848989	0.421648	0.558513	0.075486
		53	151.5	0.954397	0.783524	0.434079	1.30539	0.559602	0.807399	0.153452		53	151.5	0.563034	0.516571	0.50385	1.25825	0.578315	0.684004	0.144232
		54	156.5	2.20887	1.51398	0.868176	1.96134	1.19297	1.54907	0.244638		54	156.5	0.644099	0.635606	0.437759	1.26764	0.516429	0.700306	0.146962
		55	161.5	0.760762	1.35237	1.32463	2.78635	1.47406	1.53963	0.335152		55	161.5	0.685816	0.684043	0.725848	0.995653	0.591256	0.736523	0.0684435
		56	166.5	1.90348	0.714726	0.995682	1.1364	0.598523	1.06976	0.229471		56	166.5	0.626499	0.61541	0.666312	1.00706	0.576123	0.69828	0.0785201
		57	171.5	1.16613	0.468449	0.831286	1.41572	0.993994	0.975117	0.159433		57	171.5	0.795555	0.614615	0.660914	0.926551	0.631942	0.725916	0.0593921
		58	176.5	0.991735	1.36797	0.560632	1.08247	0.636168	0.927795	0.148597		58	176.5	0.710036	0.651118	0.633224	1.05378	0.627236	0.735079	0.0810102
		59	181.5	1.07463	1.02894	0.654369	0.917819	3.78951	1.49305	0.578727		59	181.5	0.709315	0.716188	0.669766	0.897158	0.388594	0.676204	0.081938
		60	186.5	1.93266	1.20856	1.00066	1.23656	0.954198	1.26653	0.175531		60	186.5	0.65844	0.642451	0.730387	1.20201	0.601024	0.766862	0.110774
		61	191.5	2.19256	1.35466	1.15263	1.3599	0.557759	1.3235	0.262023		61	191.5	0.684219	0.703573	0.652796	1.0109	0.627236	0.735745	0.0700201
		62	196.5	0.159815	1.02609	1.13346	1.58141	0.463246	0.872805	0.251958		62	196.5	0.693936	0.719014	0.715921	0.832208	0.54287	0.70079	0.0462695
		63	201.5	-0.0221449	1.43596	0.998223	1.95498	0.81668	1.03674	0.329674		63	201.5	0.658629	0.685435	0.689519	0.85689	0.641565	0.706408	0.0386376
		64	206.5	1.30156	1.51059	1.12106	0.878886	1.11513	1.18544	0.105421		64	206.5	0.782857	0.795413	0.730401	0.700307	0.68488	0.738772	0.0219154
		65	211.5	-0.292686	0.50623	1.27226	1.96687	1.20696	0.931928	0.383633		65	211.5	0.690539	0.70802	0.741075	1.00845	0.8513	0.799876	0.0591588
		66	216.5	0.780219	0.641028	0.502202	2.01506	0.793487	0.9464	0.27236		66	216.5	0.75082	0.754037	0.798482	1.21439	0.743008	0.852148	0.0910787
		67	221.5	0.249458	1.08967	0.809935	0.817254	1.63507	0.920276	0.224989		67	221.5	0.813453	0.699312	0.676784	0.662032	0.739549	0.718226	0.0271623
		68	226.5	1.67916	1.11229	0.886401	1.13108	1.68297	1.29838	0.162057		68	226.5	0.789037	0.791059	0.660261	0.98383	0.635492	0.771936	0.0619055
