# Supplementary material for: Myosin-based regulation of twitch and tetanic contractions in mammalian skeletal muscle
Source: eLife. 2021 Jun 14;10:e68211. doi: 10.7554/eLife.68211 (PMC8275128; doi:10.7554/eLife.68211)
Supplement: Figure 4—source data 1. [file elife-68211-fig4-data1.xlsx]

## Sheet: 1D Profiles - M6
		Rest		Early Activation		Peak Force		Mechanically Relaxed
Key	Reciprocal Spacing (nm-1)	Mean Twitch Intensity	Mean Tetanus Intensity	Mean Twitch Intensity	Mean Tetanus Intensity	Mean Twitch Intensity	Mean Tetanus Intensity	Mean Twitch Intensity	Mean Tetanus Intensity
Rest	0.130919	4.39617e-05	6.01087e-05	4.69689e-05	8.20077e-05	3.23225e-05	2.09837e-05	8.69161e-05	7.13344e-05
Early Activation	0.131129	1.72313e-05	4.30676e-05	0.000104234	0.000227088	3.56928e-05	3.2546e-05	4.9925e-05	4.94442e-05
Peak Force	0.131339	2.9674e-05	4.23074e-05	1.27315e-05	6.69101e-05	3.95625e-05	5.20976e-05	2.50653e-05	5.583e-05
Mechanically Relaxed	0.131549	1.68497e-05	2.43503e-05	9.9093e-05	0.00020967	8.50786e-05	0.000189717	6.19077e-05	0.000104594
	0.131758	5.85383e-05	7.94352e-05	0.000134952	0.000285334	0.000145939	4.44267e-05	0.000134521	9.11721e-05
	0.131968	0.000126025	0.000143288	0.000127341	0.000144467	8.7467e-05	0.000102264	0.000140274	0.000188338
	0.132178	0.000159873	0.000123138	0.000176386	0.000133566	0.000157547	0.000154521	0.00013675	0.000122302
	0.132388	9.68093e-05	8.17759e-05	0.000181823	0.000129358	0.000141265	0.000122664	0.000107433	8.25294e-05
	0.132598	5.3361e-05	4.35558e-05	0.000151024	0.00020591	7.97385e-05	0.000126983	0.000104014	3.0781e-05
	0.132808	3.65517e-05	6.39147e-05	0.00024373	0.000176426	4.88421e-05	8.16875e-05	6.53114e-05	4.22788e-05
	0.133017	6.08793e-05	5.20206e-05	7.68111e-05	0.00018964	3.10902e-05	0.000122021	4.82854e-05	2.18044e-05
	0.133227	1.3805e-05	3.23404e-05	7.52076e-05	0	8.98755e-05	0.000307653	0	0
	0.133437	3.22887e-05	6.76233e-05	9.89737e-05	5.20988e-05	0	0.000221036	6.95925e-05	2.2778e-05
	0.133647	3.89423e-05	9.59232e-05	8.55157e-05	0.000170507	8.02815e-05	0.000254075	6.22291e-05	6.99905e-05
	0.133857	4.1187e-05	3.39121e-05	0.000105612	0.000368168	8.51101e-05	0.000214025	3.49331e-05	6.32049e-05
	0.134066	5.42487e-05	4.288e-05	0.000138966	9.03153e-05	4.58981e-05	0.000185006	4.34859e-05	0.000102753
	0.134276	0.000128218	0.000104453	5.44266e-05	0.000118769	5.08031e-05	0.000114125	0.000139856	8.0996e-05
	0.134486	0.000108347	0.000118357	3.88333e-05	6.09136e-05	3.11055e-05	6.08248e-05	0.000134383	5.70273e-05
	0.134696	9.58367e-05	0.000131975	5.1474e-05	1.25232e-06	2.44433e-06	3.20121e-05	0.000118857	6.85447e-05
	0.134906	8.57973e-05	6.93356e-05	3.9453e-05	0.00013103	0.000155066	7.91356e-05	8.41358e-05	8.4116e-05
	0.135115	7.0685e-05	4.27134e-05	0	0.0001225	0.000130267	2.75326e-05	6.22361e-05	2.54934e-05
	0.135325	5.86647e-05	3.00433e-05	1.39209e-05	8.30916e-05	7.27177e-05	7.98696e-05	7.32801e-05	2.68651e-05
	0.135535	2.14673e-05	1.23782e-05	2.80151e-05	9.42819e-05	5.20159e-05	0.000140271	1.58558e-05	2.69045e-05
	0.135745	1.4932e-05	1.71541e-05	2.18641e-05	0.000135664	9.51243e-05	0.000119946	2.37731e-05	5.15602e-06
	0.135955	9.77767e-06	2.1977e-05	0.000133455	6.05712e-05	9.72103e-05	0.000148329	6.43025e-05	3.20737e-05
	0.136164	5.42983e-05	4.82459e-05	0.00019513	4.95587e-05	0.000102598	0.00042777	7.6107e-05	5.89539e-05
	0.136374	8.2384e-05	5.28628e-05	0.000193085	0.000102858	0.000146753	0.00102067	2.16242e-05	7.84377e-05
	0.136584	5.57367e-05	6.30087e-05	0.000123794	0.000119918	0.000175972	0.00173754	6.69294e-05	7.92744e-05
	0.136794	2.77613e-05	5.52766e-05	0.000203569	0.000263682	0.000343575	0.00243269	8.18273e-05	0.000125478
	0.137004	6.2716e-05	7.58844e-05	0.000206647	0.000387804	0.000597675	0.00254602	9.03898e-05	0.000136787
	0.137213	5.38117e-05	0.000110247	0.000376002	0.000623094	0.00089431	0.00193964	8.19385e-05	0.000151933
	0.137423	0.000118522	0.00010994	0.000750609	0.000798074	0.00119892	0.00144171	0.000109185	0.000150531
	0.137633	0.000102998	0.000102496	0.00117748	0.00143443	0.00146662	0.00124679	0.000123952	0.000133506
	0.137843	0.000115943	9.1239e-05	0.00171054	0.00197405	0.00155249	0.00131944	9.04366e-05	0.000137254
	0.138053	0.000166062	0.000158547	0.0018539	0.00239077	0.001446	0.00116232	0.000210037	0.00033603
	0.138262	0.000333405	0.000341968	0.00193172	0.00246117	0.00128038	0.000886562	0.000451995	0.000723665
	0.138472	0.000799587	0.000732036	0.00143253	0.00193698	0.000917677	0.00046933	0.0010533	0.00138605
	0.138682	0.00154539	0.0014996	0.00112751	0.00172284	0.000682695	0.00033688	0.00188135	0.00217898
	0.138892	0.00240559	0.00241777	0.000857703	0.00132829	0.000592911	0.000190667	0.00249328	0.00248348
	0.139102	0.00253223	0.00270036	0.000562375	0.000908381	0.000442967	0.000182467	0.00235735	0.00211817
	0.139312	0.00176948	0.00196366	0.000300628	0.000545782	0.000319274	8.05712e-05	0.00146433	0.00123095
	0.139521	0.000953326	0.00101494	0.000386333	0.000463656	0.000275249	0.000115136	0.000737653	0.000783405
	0.139731	0.000769331	0.000776248	0.000387099	0.000358618	0.00024656	6.89473e-05	0.000721282	0.000769791
	0.139941	0.00121416	0.00115187	0.000318563	0.00040931	0.000216722	8.54121e-05	0.00099548	0.000942751
	0.140151	0.00133941	0.00136235	0.000356245	0.000619059	0.000241601	4.60221e-05	0.00109147	0.000920832
	0.140361	0.000907753	0.000971048	0.000232338	0.000390874	0.000153488	0	0.000721162	0.000580138
	0.14057	0.000401865	0.000489991	0.000168894	0.000327264	0.000140415	1.99721e-05	0.000339459	0.000304794
	0.14078	0.000110106	0.000172839	2.77019e-05	3.95128e-05	5.78054e-05	8.26352e-06	0.000127488	9.68083e-05
	0.14099	1.27427e-05	2.10013e-05	0	0.000127414	7.93388e-05	2.22309e-05	2.16876e-05	5.32138e-05
	0.1412	8.42033e-06	2.15062e-05	1.67287e-05	3.46426e-05	7.54722e-05	4.30209e-05	0	2.63871e-05
	0.14141	0	7.86511e-06	0	0.000113028	0	0.000116539	1.70166e-05	0

## Sheet: Figure 4 Source Data
				FIGURE 4 C									FIGURE 4 D
Key			IM6	Twitch								SM6	Twitch
Rest		Frame No.	Time (ms)	M06_IM6	M12_IM6	M23_IM6	M24_IM6	Mean	SE		Frame No.	Time (ms)	M06_SM6	M12_SM6	M23_SM6	M24_SM6	Mean	SE
Early Activation		19	-18.5	1.01282	1.02245	1.0299	1.06029	1.03137	0.0102564		19	-18.5	7.16788	7.17259	7.17878	7.1729	7.17304	0.00223241
Peak Force		20	-13.5	1.0184	0.909832	0.926689	1.01242	0.966835	0.028281		20	-13.5	7.16975	7.16992	7.17789	7.17423	7.17295	0.00194755
Isometric Relaxation		21	-8.5	0.98793	1.02942	1.03329	0.999031	1.01242	0.0111925		21	-8.5	7.17025	7.17129	7.17932	7.17631	7.1743	0.0021358
Chaotic Relaxation		22	-3.5	0.978779	1.03888	1.00955	0.918496	0.986425	0.025753		22	-3.5	7.1685	7.17045	7.17571	7.17502	7.17242	0.00175241
Mechanically Relaxed		23	1.5	0.934024	0.994948	1.03435	0.836989	0.950078	0.0429748		23	1.5	7.17403	7.17603	7.17899	7.17869	7.17693	0.00117557
		24	6.5	1.05155	0.608363	1.09295	0.819481	0.893085	0.112376		24	6.5	7.22436	7.23066	7.22476	7.22506	7.22621	0.00149007
		25	11.5	1.14608	0.549637	0.633065	0.744188	0.768243	0.1321		25	11.5	7.2472	7.24475	7.23661	7.23827	7.24171	0.00253668
		26	16.5	1.35293	0.523499	0.804189	0.758043	0.859666	0.175529		26	16.5	7.23955	7.24913	7.2396	7.23684	7.24128	0.00269546
		27	21.5	1.16717	0.765578	0.67545	0.65444	0.815658	0.119623		27	21.5	7.22431	7.22475	7.21948	7.22088	7.22236	0.00129168
		28	26.5	1.01322	0.516954	0.942076	0.781296	0.813386	0.110074		28	26.5	7.20303	7.19931	7.20914	7.20904	7.20513	0.00240912
		29	31.5	1.10316	0.698968	1.1226	0.86018	0.946227	0.101766		29	31.5	7.18449	7.18724	7.18998	7.19484	7.18914	0.00220663
		30	36.5	0.86338	0.626714	0.912248	1.05192	0.863564	0.0884801		30	36.5	7.18468	7.19132	7.18802	7.19248	7.18913	0.00175827
		31	41.5	0.89595	0.76474	1.0973	0.666156	0.856036	0.0931798		31	41.5	7.17735	7.18109	7.18562	7.18485	7.18223	0.0019024
		32	46.5	0.901762	0.778909	1.0908	0.990853	0.940582	0.0662941		32	46.5	7.17749	7.17784	7.18127	7.18425	7.18021	0.00159301
		33	51.5	1.09619	0.866739	1.09297	0.991443	1.01184	0.0541348		33	51.5	7.1748	7.17782	7.18266	7.18475	7.18001	0.00226172
		34	56.5	0.966044	0.925518	1.06598	1.23558	1.04828	0.069057		34	56.5	7.17313	7.1769	7.18212	7.18257	7.17868	0.00225318
		35	61.5	0.997768	1.08498	1.13159	0.823007	1.00934	0.0680193		35	61.5	7.17407	7.17635	7.18189	7.18348	7.17895	0.00223143
		36	66.5	1.03163	0.883374	1.01625	1.21514	1.0366	0.0681868		36	66.5	7.17273	7.1763	7.18104	7.17866	7.17718	0.00177215
		37	71.5	0.939293	0.925471	1.09311	0.820348	0.944557	0.0561911		37	71.5	7.17496	7.17859	7.18404	7.18014	7.17943	0.00188165
		38	76.5	1.05278	1.12316	1.13808	0.877312	1.04783	0.0598055		38	76.5	7.17352	7.17682	7.18022	7.18392	7.17862	0.00223327
		39	81.5	1.12276	0.92391	0.928213	0.804052	0.944733	0.0659481		39	81.5	7.17281	7.17564	7.17903	7.18169	7.17729	0.00194065
		40	86.5	0.971372	1.00349	0.986276	0.782107	0.935811	0.0516532		40	86.5	7.17539	7.17653	7.18472	7.18158	7.17955	0.00218417
		41	91.5	0.962173	0.949983	0.982141	0.971861	0.966539	0.00686128		41	91.5	7.17508	7.17566	7.18078	7.18271	7.17856	0.00188637
		42	96.5	1.07465	0.9251	0.942863	0.99849	0.985275	0.0336424		42	96.5	7.17309	7.17625	7.18143	7.18096	7.17793	0.00199529
			IM6Wc	Tetanus									SM6	Tetanus
		Frame No.	Time (ms)	M05_IM6	M10_IM6	M11_IM6	M23_IM6	M24_IM6	Mean	SE		Frame No.	Time (ms)	M05_SM6	M10_SM6	M11_SM6	M23_SM6	M24_SM6	Mean	SE
		19	-18.5	1.02656	0.994284	0.976409	0.824111	1.13241	0.990754	0.0496675		19	-18.5	7.1684	7.16746	7.17047	7.17871	7.17499	7.17201	0.00211922
		20	-13.5	1.07006	1.00493	1.04922	1.11177	0.990843	1.04537	0.021957		20	-13.5	7.17006	7.16929	7.17198	7.17659	7.17993	7.17357	0.00203436
		21	-8.5	0.938828	0.964726	1.03187	0.938898	0.778287	0.930522	0.0416873		21	-8.5	7.16836	7.16785	7.17169	7.17502	7.17805	7.17219	0.00195149
		22	-3.5	0.966504	1.03414	0.944074	1.1291	1.10314	1.03539	0.0363702		22	-3.5	7.16757	7.16851	7.17259	7.18188	7.17898	7.1739	0.00283142
		23	1.5	1.15409	0.963875	0.886614	0.989702	1.06441	1.01174	0.0455365		23	1.5	7.16932	7.16976	7.1759	7.1846	7.18447	7.17681	0.00335993
		24	6.5	1.08431	1.3298	0.89396	1.30583	1.19097	1.16097	0.0798622		24	6.5	7.20162	7.22025	7.22428	7.23077	7.23149	7.22168	0.00543088
		25	11.5	1.03711	1.36692	0.881134	0.797921	0.962642	1.00915	0.0979675		25	11.5	7.23905	7.25754	7.26196	7.25146	7.25393	7.25279	0.00386481
		26	16.5	1.40118	0.991891	1.55894	0.749408	0.453182	1.03092	0.203771		26	16.5	7.24919	7.27375	7.27086	7.26818	7.2791	7.26822	0.0050897
		27	21.5	1.29547	0.87086	1.1876	0.753689	0.964641	1.01445	0.100012		27	21.5	7.26158	7.27816	7.28006	7.27502	7.27027	7.27302	0.00330402
		28	26.5	0.954224	1.00796	1.35697	1.06312	0.880187	1.05249	0.0818989		28	26.5	7.26781	7.28126	7.28226	7.27802	7.27728	7.27733	0.0025588
		29	31.5	1.04239	1.07064	0.965081	0.714635	0.859501	0.930448	0.065189		29	31.5	7.26998	7.281	7.28355	7.27766	7.28455	7.27934	0.00262814
		30	36.5	1.19204	0.891657	1.08518	1.22441	1.12645	1.10395	0.0583944		30	36.5	7.27473	7.2817	7.28698	7.27965	7.2789	7.28039	0.00199978
		31	41.5	1.27124	0.909618	0.545906	1.45173	0.701653	0.976029	0.17002		31	41.5	7.27875	7.28214	7.28615	7.27969	7.28816	7.28298	0.00182175
		32	46.5	0.880402	0.753145	0.867585	0.762458	0.315978	0.715913	0.103335		32	46.5	7.27418	7.28066	7.28501	7.28111	7.2777	7.27973	0.00181073
		33	51.5	1.12907	0.941487	0.589686	0.846745	0.727899	0.846977	0.091893		33	51.5	7.27866	7.28156	7.28695	7.27928	7.2824	7.28177	0.00146857
		34	56.5	1.66804	1.07487	0.940721	1.62991	1.21625	1.30596	0.146782		34	56.5	7.27915	7.28502	7.28678	7.27834	7.27664	7.28119	0.00198586
		35	61.5	1.14354	0.781927	1.01312	1.0063	0.755156	0.940011	0.0742722		35	61.5	7.27885	7.28062	7.27951	7.28545	7.28123	7.28113	0.00115586
		36	66.5	1.7913	1.03478	0.953533	0.919814	0.580391	1.05596	0.199545		36	66.5	7.28364	7.28304	7.28651	7.28256	7.28357	7.28386	0.000690685
		37	71.5	1.28953	0.699059	1.96843	0.837127	0.711176	1.10107	0.241985		37	71.5	7.27892	7.28465	7.28731	7.28203	7.28402	7.28338	0.00139972
		38	76.5	0.9214	0.81328	3.30458	0.875554	0.405231	1.26401	0.518308		38	76.5	7.27902	7.28476	7.28435	7.28515	7.28182	7.28302	0.00115673
		39	81.5	1.11947	1.11547	1.99864	0.781866	0.346217	1.07233	0.271453		39	81.5	7.27864	7.28277	7.28768	7.27619	7.28948	7.28295	0.00254293
		40	86.5	0.892124	1.1892	0.925443	0.839929	0.421543	0.853647	0.12372		40	86.5	7.28202	7.28448	7.28016	7.27995	7.29032	7.28339	0.0019147
		41	91.5	1.30399	1.19468	2.3356	0.699765	0.595996	1.226	0.3092		41	91.5	7.28168	7.28008	7.28774	7.28135	7.27964	7.2821	0.00146096
		42	96.5	1.08497	1.28387	0.836929	0.714877	0.834234	0.950975	0.102749		42	96.5	7.27822	7.28679	7.28573	7.28406	7.27884	7.28273	0.00177194
		43	101.5	1.12991	0.860192	3.01744	1.16963	0.553813	1.3462	0.432151		43	101.5	7.28222	7.28233	7.28434	7.27878	7.29235	7.284	0.00226976
		44	106.5	1.02192	0.849728	1.74378	0.975971	0.8834	1.09496	0.165131		44	106.5	7.28178	7.28495	7.28865	7.2819	7.28778	7.28501	0.00143191
		45	111.5	0.868924	0.811052	0.532169	1.1263	0.535642	0.774818	0.111757		45	111.5	7.27893	7.28427	7.29302	7.2794	7.27889	7.2829	0.0027239
		46	116.5	1.14176	1.16602	0.547634	1.11868	0.738882	0.942595	0.126112		46	116.5	7.27233	7.28235	7.2831	7.27242	7.27843	7.27773	0.00232492
		47	121.5	1.00802	0.828557	1.02225	1.29991	0.564085	0.944564	0.121358		47	121.5	7.25637	7.27219	7.27571	7.26956	7.2698	7.26872	0.0032812
		48	126.5	0.870699	0.752998	0.773564	1.71345	1.26891	1.07592	0.184595		48	126.5	7.24572	7.27076	7.25989	7.23906	7.25967	7.25502	0.00563162
		49	131.5	1.08794	1.38623	2.03024	0.864567	0.793279	1.23245	0.224634		49	131.5	7.2303	7.24646	7.23378	7.21385	7.24096	7.23307	0.00556407
		50	136.5	0.854989	0.854874	0.888562	0.571301	1.21304	0.876553	0.101853		50	136.5	7.2096	7.19464	7.21551	7.20135	7.21553	7.20733	0.00409881
		51	141.5	0.793678	1.11097	0.784105	0.851447	1.27439	0.962919	0.0979742		51	141.5	7.19657	7.19815	7.19722	7.20313	7.20182	7.19938	0.00130535
		52	146.5	0.817588	1.2118	0.912481	0.928294	0.698655	0.913763	0.0850168		52	146.5	7.18643	7.19185	7.1872	7.19201	7.20399	7.1923	0.00314169
		53	151.5	0.959073	0.874172	0.723117	0.7241	2.11352	1.0788	0.2626		53	151.5	7.18239	7.18858	7.18837	7.18503	7.19616	7.1881	0.00231666
		54	156.5	0.670151	0.863849	0.708908	1.13522	0.69283	0.814191	0.0872024		54	156.5	7.18092	7.18659	7.18804	7.18788	7.19318	7.18732	0.00195754
		55	161.5	1.11829	0.855651	0.64664	1.04975	0.751903	0.884446	0.0885876		55	161.5	7.18228	7.18473	7.18703	7.1881	7.18949	7.18632	0.0012767
		56	166.5	0.783117	0.89483	0.964388	1.02546	0.931544	0.919869	0.0403709		56	166.5	7.18332	7.18482	7.18536	7.19023	7.19361	7.18747	0.00192472
		57	171.5	0.832205	0.774346	0.924146	0.899216	0.903403	0.866663	0.02777		57	171.5	7.18257	7.18162	7.18689	7.18891	7.19032	7.18606	0.00171523
		58	176.5	1.16343	0.891132	0.966084	1.33719	0.762708	1.02411	0.101688		58	176.5	7.18058	7.18061	7.18418	7.18617	7.18973	7.18425	0.00173786
		59	181.5	1.05213	0.906417	0.841228	0.924827	0.878132	0.920547	0.0357926		59	181.5	7.17596	7.17963	7.18538	7.18612	7.19181	7.18378	0.00274798
		60	186.5	0.833574	0.864399	0.789222	1.15963	1.02427	0.934218	0.0689008		60	186.5	7.17807	7.18175	7.18489	7.18506	7.18785	7.18353	0.00167078
		61	191.5	0.933984	0.893051	0.889267	0.960901	0.853756	0.906192	0.0186737		61	191.5	7.18356	7.18096	7.18598	7.18739	7.18778	7.18513	0.00127934
		62	196.5	0.999414	1.11128	0.842048	1.1223	1.00545	1.0161	0.0505092		62	196.5	7.17828	7.17913	7.18693	7.18533	7.19077	7.18409	0.00237323
		63	201.5	0.91389	1.01369	1.08011	1.0983	0.867197	0.99464	0.0453748		63	201.5	7.18202	7.17984	7.18555	7.18966	7.19038	7.18549	0.00206461
		64	206.5	0.749949	1.04849	1.01466	0.862887	1.02115	0.939428	0.0574432		64	206.5	7.17931	7.18033	7.18466	7.18613	7.18589	7.18326	0.0014376
		65	211.5	0.930649	0.994249	0.982584	1.10902	1.13296	1.02989	0.0388861		65	211.5	7.17833	7.18003	7.18393	7.18095	7.18801	7.18225	0.00170172
		66	216.5	0.999263	0.89533	0.855252	1.02905	0.857181	0.927215	0.0365109		66	216.5	7.17838	7.18067	7.1842	7.1859	7.18941	7.18371	0.00193973
		67	221.5	0.957868	0.907758	0.855315	0.834923	0.811248	0.873423	0.026444		67	221.5	7.17669	7.18085	7.18653	7.18796	7.18997	7.1844	0.00245262
		68	226.5	1.07944	1.05822	0.825072	1.02026	0.983929	0.993385	0.045139		68	226.5	7.17554	7.17867	7.1867	7.1838	7.18746	7.18243	0.00231397

## Sheet: Figure 4 Suppl Source Data
				FIGURE SUPPL 4 B									FIGURE SUPPL 4 B									FIGURE SUPPL 4 C									FIGURE SUPPL 4 C
Key			LM6	Twitch								MM6	Twitch								SLA	Twitch								SHA	Twitch
Rest		Frame No.	Time (ms)	M06_LM6	M12_LM6	M23_LM6	M24_LM6	Mean	SE		Frame No.	Time (ms)	M06_MM6	M12_MM6	M23_MM6	M24_MM6	Mean	SE		Frame No.	Time (ms)	M06_SLA	M12_SLA	M23_SLA	M24_SLA	Mean	SE		Frame No.	Time (ms)	M06_SHA	M12_SHA	M23_SHA	M24_SHA	Mean	SE
Early Activation		19	-18.5	0.619977	0.685267	0.710269	0.681143	0.674164	0.0191741		19	-18.5	0.380023	0.314733	0.289731	0.318857	0.325836	0.0191741		19	-18.5	7.18884	7.1904	7.19467	7.1911	7.19125	0.00123232		19	-18.5	7.13394	7.1341	7.14012	7.13433	7.13563	0.00150182
Peak Force		20	-13.5	0.651278	0.665944	0.747078	0.694475	0.689694	0.0211259		20	-13.5	0.348722	0.334056	0.252922	0.305525	0.310306	0.0211259		20	-13.5	7.18905	7.18827	7.19228	7.19176	7.19034	0.00098804		20	-13.5	7.13397	7.1336	7.13574	7.13468	7.1345	0.000469306
Isometric Relaxation		21	-8.5	0.667391	0.674791	0.748451	0.728684	0.704829	0.0199496		21	-8.5	0.332609	0.325209	0.251549	0.271316	0.295171	0.0199496		21	-8.5	7.18867	7.18939	7.19343	7.19214	7.19091	0.0011229		21	-8.5	7.13356	7.13403	7.13769	7.13416	7.13486	0.000952304
Chaotic Relaxation		22	-3.5	0.633275	0.663646	0.667435	0.686745	0.662775	0.0110578		22	-3.5	0.366725	0.336354	0.332565	0.313255	0.337225	0.0110578		22	-3.5	7.18869	7.18987	7.19403	7.19282	7.19135	0.00124385		22	-3.5	7.13389	7.13243	7.13923	7.1363	7.13546	0.00148918
Mechanically Relaxed		23	1.5	0.675617	0.727636	0.719331	0.729764	0.713087	0.0126912		23	1.5	0.324383	0.272364	0.280669	0.270236	0.286913	0.0126912		23	1.5	7.19306	7.19249	7.19597	7.19544	7.19424	0.000860471		23	1.5	7.13469	7.13243	7.13584	7.13384	7.1342	0.000718887
		24	6.5	0.876997	0.919706	0.83624	0.871801	0.876186	0.0171016		24	6.5	0.123003	0.0802942	0.16376	0.128199	0.123814	0.0171016		24	6.5	7.23445	7.23661	7.23898	7.23463	7.23617	0.00105764		24	6.5	7.1532	7.16316	7.15305	7.16069	7.15753	0.0025906
		25	11.5	0.939693	0.882544	0.876094	0.828627	0.881739	0.0227524		25	11.5	0.0603074	0.117456	0.123906	0.171373	0.118261	0.0227524		25	11.5	7.25304	7.25343	7.24628	7.25496	7.25193	0.00192758		25	11.5	7.15748	7.18023	7.169	7.15861	7.16633	0.00530957
		26	16.5	0.911839	0.936585	0.821992	0.780449	0.862716	0.0368509		26	16.5	0.0881612	0.0634155	0.178008	0.219551	0.137284	0.0368509		26	16.5	7.24827	7.25309	7.24934	7.25277	7.25087	0.00121172		26	16.5	7.1505	7.19118	7.19495	7.1808	7.17936	0.010075
		27	21.5	0.876145	0.912698	0.763205	0.827193	0.84481	0.032353		27	21.5	0.123855	0.0873015	0.236795	0.172807	0.15519	0.032353		27	21.5	7.23586	7.2328	7.2402	7.23448	7.23583	0.00158299		27	21.5	7.14369	7.14172	7.15352	7.15645	7.14885	0.0036163
		28	26.5	0.830359	0.863985	0.930422	0.907337	0.883026	0.0223118		28	26.5	0.169641	0.136015	0.0695779	0.0926627	0.116974	0.0223118		28	26.5	7.21548	7.20854	7.21369	7.21614	7.21346	0.0017219		28	26.5	7.14268	7.14127	7.14876	7.14028	7.14325	0.00190264
		29	31.5	0.768911	0.796034	0.744324	0.870596	0.794966	0.0273321		29	31.5	0.231089	0.203966	0.255676	0.129404	0.205034	0.0273321		29	31.5	7.20012	7.19967	7.2066	7.20243	7.20221	0.00158513		29	31.5	7.13297	7.13913	7.14204	7.14416	7.13957	0.00242977
		30	36.5	0.773598	0.861398	0.774272	0.772378	0.795411	0.021999		30	36.5	0.226402	0.138602	0.225728	0.227622	0.204589	0.021999		30	36.5	7.19778	7.19986	7.20229	7.20535	7.20132	0.00163028		30	36.5	7.14027	7.13873	7.13952	7.14914	7.14191	0.00242824
		31	41.5	0.704599	0.779619	0.726623	0.731167	0.735502	0.0158085		31	41.5	0.295401	0.220381	0.273377	0.268833	0.264498	0.0158085		31	41.5	7.19463	7.19484	7.20121	7.20036	7.19776	0.00175575		31	41.5	7.13648	7.13287	7.14451	7.14299	7.13921	0.00273988
		32	46.5	0.734905	0.756078	0.726425	0.76447	0.74547	0.00888755		32	46.5	0.265095	0.243922	0.273575	0.23553	0.25453	0.00888755		32	46.5	7.19313	7.19218	7.19945	7.1975	7.19557	0.00173678		32	46.5	7.13449	7.13373	7.13343	7.14156	7.1358	0.00193328
		33	51.5	0.685243	0.732676	0.753235	0.777402	0.737139	0.0195646		33	51.5	0.314757	0.267324	0.246765	0.222598	0.262861	0.0195646		33	51.5	7.19287	7.19339	7.19738	7.19815	7.19545	0.00135221		33	51.5	7.13578	7.13551	7.13808	7.13834	7.13693	0.000744628
		34	56.5	0.673441	0.729806	0.746725	0.742287	0.723065	0.0169244		34	56.5	0.326559	0.270194	0.253275	0.257713	0.276935	0.0169244		34	56.5	7.19186	7.19298	7.19863	7.19812	7.1954	0.00173718		34	56.5	7.13482	7.13382	7.13388	7.13817	7.13517	0.00102559
		35	61.5	0.691732	0.712559	0.744229	0.753271	0.725448	0.0142296		35	61.5	0.308268	0.287441	0.255771	0.246729	0.274552	0.0142296		35	61.5	7.19173	7.1936	7.19747	7.19775	7.19514	0.0014782		35	61.5	7.13475	7.13392	7.13694	7.14025	7.13647	0.00141295
		36	66.5	0.666021	0.71942	0.714445	0.700257	0.700036	0.0120429		36	66.5	0.333979	0.28058	0.285555	0.299743	0.299964	0.0120429		36	66.5	7.19185	7.19284	7.19775	7.19752	7.19499	0.00154229		36	66.5	7.1349	7.13426	7.13957	7.13497	7.13593	0.00122489
		37	71.5	0.702623	0.734813	0.752086	0.78027	0.742448	0.0162473		37	71.5	0.297377	0.265187	0.247914	0.21973	0.257552	0.0162473		37	71.5	7.19175	7.19346	7.19979	7.19337	7.19459	0.00177603		37	71.5	7.13559	7.13773	7.1367	7.13354	7.13589	0.000896486
		38	76.5	0.688361	0.723257	0.688517	0.77904	0.719794	0.021386		38	76.5	0.311639	0.276743	0.311483	0.22096	0.280206	0.021386		38	76.5	7.19165	7.19312	7.1985	7.19703	7.19507	0.00160902		38	76.5	7.13379	7.13458	7.14014	7.13807	7.13665	0.0014914
		39	81.5	0.667341	0.713737	0.716165	0.753424	0.712667	0.017628		39	81.5	0.332659	0.286263	0.283835	0.246576	0.287333	0.017628		39	81.5	7.19231	7.19285	7.19581	7.19612	7.19427	0.000986032		39	81.5	7.13401	7.13309	7.13706	7.13794	7.13552	0.00116872
		40	86.5	0.707211	0.714294	0.762709	0.759255	0.735867	0.014589		40	86.5	0.292789	0.285706	0.237291	0.240745	0.264133	0.014589		40	86.5	7.19207	7.19384	7.19876	7.19663	7.19533	0.00147997		40	86.5	7.13541	7.13362	7.13995	7.13452	7.13588	0.0014072
		41	91.5	0.693858	0.71139	0.733551	0.792103	0.732725	0.0213937		41	91.5	0.306142	0.28861	0.266449	0.207897	0.267275	0.0213937		41	91.5	7.19259	7.1924	7.196	7.19554	7.19414	0.000951143		41	91.5	7.13571	7.13471	7.13919	7.13425	7.13596	0.00111577
		42	96.5	0.69075	0.700415	0.73503	0.755524	0.72043	0.0150728		42	96.5	0.30925	0.299585	0.26497	0.244476	0.27957	0.0150728		42	96.5	7.19045	7.19376	7.19717	7.19582	7.1943	0.00146239		42	96.5	7.13459	7.13563	7.13813	7.13544	7.13595	0.000760667
			LM6	Tetanus									MM6	Tetanus									SLA	Tetanus									SMA	Tetanus
		Frame No.	Time (ms)	M05	M10	M11	M23	M24	Mean	SE		Frame No.	Time (ms)	M05	M10	M11	M23	M24	Mean	SE		Frame No.	Time (ms)	M05	M10	M11	M23	M24	Mean	SE		Frame No.	Time (ms)	M05	M10	M11	M23	M24	Mean	SE
		19	-18.5	0.671073	0.66895	0.661924	0.733197	0.69656	0.686341	0.013099		19	-18.5	0.328927	0.33105	0.338076	0.266803	0.30344	0.313659	0.013099		19	-18.5	7.18697	7.18595	7.1891	7.19398	7.193	7.1898	0.00159806		19	-18.5	7.13081	7.13039	7.13427	7.13707	7.13397	7.1333	0.00122996
		20	-13.5	0.683103	0.690341	0.679965	0.688994	0.74388	0.697257	0.0118092		20	-13.5	0.316897	0.309659	0.320035	0.311006	0.25612	0.302743	0.0118092		20	-13.5	7.1874	7.18688	7.1892	7.19489	7.19539	7.19075	0.00183547		20	-13.5	7.13298	7.13038	7.13567	7.13637	7.1354	7.13416	0.00110476
		21	-8.5	0.687176	0.66569	0.666715	0.668481	0.756669	0.688946	0.0173831		21	-8.5	0.312824	0.33431	0.333285	0.331519	0.243331	0.311054	0.0173831		21	-8.5	7.18576	7.18669	7.19104	7.19512	7.19201	7.19012	0.00173603		21	-8.5	7.13043	7.13062	7.13329	7.13483	7.13497	7.13283	0.000985498
		22	-3.5	0.65022	0.660476	0.695197	0.771084	0.745203	0.704436	0.0235172		22	-3.5	0.34978	0.339524	0.304803	0.228916	0.254797	0.295564	0.0235172		22	-3.5	7.18678	7.18766	7.18913	7.19454	7.19258	7.19014	0.0014789		22	-3.5	7.13212	7.13154	7.13514	7.13955	7.13951	7.13557	0.0017268
		23	1.5	0.687555	0.675913	0.687539	0.785606	0.808638	0.72905	0.0281081		23	1.5	0.312445	0.324087	0.312461	0.214394	0.191362	0.27095	0.0281081		23	1.5	7.18795	7.18868	7.19434	7.19913	7.19591	7.1932	0.0021422		23	1.5	7.12867	7.13064	7.13564	7.13185	7.1365	7.13266	0.00148826
		24	6.5	0.342921	0.88702	0.851576	0.910953	0.674105	0.733315	0.106085		24	6.5	0.481504	0.11298	0.148424	0.0890466	0.325895	0.23157	0.0750514		24	6.5	7.24204	7.23103	7.236	7.23911	7.24301	7.23824	0.00218022		24	6.5	7.19958	7.13672	7.15778	7.14648	7.20778	7.16967	0.0143376
		25	11.5	0.719152	0.851856	0.847692	0.725448	0.766926	0.782215	0.028784		25	11.5	0.280848	0.148144	0.152308	0.274552	0.233074	0.217785	0.028784		25	11.5	7.25438	7.26475	7.26809	7.26622	7.27246	7.26518	0.00299473		25	11.5	7.20007	7.21639	7.22807	7.21274	7.19362	7.21018	0.00608838
		26	16.5	0.676185	0.787802	0.84402	0.636146	0.768858	0.742602	0.0379224		26	16.5	0.323815	0.212198	0.15598	0.363854	0.231142	0.257398	0.0379224		26	16.5	7.26992	7.28255	7.28036	7.28728	7.289	7.28182	0.00335967		26	16.5	7.20629	7.24123	7.21991	7.23505	7.24635	7.22977	0.00735876
		27	21.5	0.673527	0.754526	0.795056	0.652225	0.520607	0.679188	0.0474386		27	21.5	0.326473	0.245474	0.204944	0.347775	0.479393	0.320812	0.0474386		27	21.5	7.28298	7.29042	7.29155	7.29358	7.2915	7.29001	0.00182932		27	21.5	7.21784	7.24072	7.23585	7.24046	7.24736	7.23645	0.00500045
		28	26.5	0.742729	0.72849	0.67711	0.671873	0.63128	0.690297	0.0202536		28	26.5	0.257271	0.27151	0.32289	0.328127	0.36872	0.309703	0.0202536		28	26.5	7.28132	7.29517	7.29929	7.29703	7.29859	7.29428	0.00331711		28	26.5	7.22908	7.24421	7.24681	7.23939	7.24108	7.24011	0.00303943
		29	31.5	0.656602	0.761824	0.736635	0.635496	0.600706	0.678252	0.0305803		29	31.5	0.343398	0.238176	0.263365	0.364504	0.399294	0.321748	0.0305803		29	31.5	7.2897	7.29337	7.29742	7.29883	7.30473	7.29681	0.0025455		29	31.5	7.23256	7.2417	7.24503	7.24103	7.2544	7.24294	0.00352656
		30	36.5	0.636067	0.662509	0.737069	0.615603	0.646362	0.659522	0.0208263		30	36.5	0.363933	0.337491	0.262931	0.384397	0.353638	0.340478	0.0208263		30	36.5	7.29457	7.29817	7.30044	7.30009	7.29982	7.29862	0.00108502		30	36.5	7.24031	7.24958	7.24951	7.24716	7.24096	7.24551	0.00203761
		31	41.5	0.713086	0.712456	0.725525	0.654576	0.606615	0.682452	0.0226078		31	41.5	0.286914	0.287544	0.274475	0.345424	0.393385	0.317548	0.0226078		31	41.5	7.29385	7.29698	7.29936	7.29826	7.30611	7.29891	0.00202196		31	41.5	7.24147	7.24562	7.25147	7.24476	7.26066	7.2488	0.0033751
		32	46.5	0.63012	0.734544	0.785469	0.633804	0.662546	0.689297	0.0304904		32	46.5	0.36988	0.265456	0.214531	0.366196	0.337454	0.310703	0.0304904		32	46.5	7.2944	7.29527	7.29822	7.30018	7.29448	7.29651	0.0011513		32	46.5	7.24	7.24054	7.23706	7.24835	7.24499	7.24219	0.00199427
		33	51.5	0.662303	0.754862	0.718413	0.7199	0.677155	0.706527	0.0165451		33	51.5	0.337697	0.245138	0.281587	0.2801	0.322845	0.293473	0.0165451		33	51.5	7.29846	7.29555	7.30201	7.29453	7.30229	7.29857	0.00159928		33	51.5	7.24014	7.23882	7.24879	7.24036	7.24103	7.24183	0.0017764
		34	56.5	0.662994	0.74317	0.751946	0.679818	0.60871	0.689327	0.0265548		34	56.5	0.337006	0.25683	0.248054	0.320182	0.39129	0.310673	0.0265548		34	56.5	7.29841	7.29806	7.29897	7.29711	7.29856	7.29822	0.000313442		34	56.5	7.24155	7.24755	7.25007	7.2388	7.24281	7.24416	0.00204716
		35	61.5	0.763934	0.700923	0.625727	0.628286	0.70389	0.684552	0.0260478		35	61.5	0.236066	0.299077	0.374273	0.371714	0.29611	0.315448	0.0260478		35	61.5	7.29407	7.29632	7.30234	7.30665	7.29887	7.29965	0.00222489		35	61.5	7.23004	7.2441	7.24165	7.24989	7.23965	7.24107	0.00324808
		36	66.5	0.63433	0.706801	0.746289	0.60246	0.586907	0.655357	0.0306926		36	66.5	0.36567	0.293199	0.253711	0.39754	0.413093	0.344643	0.0306926		36	66.5	7.30278	7.29851	7.30238	7.3027	7.30552	7.30238	0.00112129		36	66.5	7.25068	7.24603	7.24023	7.25224	7.25261	7.24836	0.00234477
		37	71.5	0.668585	0.760236	0.729704	0.65339	0.689934	0.70037	0.0197113		37	71.5	0.331415	0.239764	0.270296	0.34661	0.310066	0.29963	0.0197113		37	71.5	7.29837	7.29915	7.30269	7.30152	7.30399	7.30114	0.00105667		37	71.5	7.23999	7.23906	7.24609	7.24557	7.24	7.24214	0.00151711
		38	76.5	0.725894	0.67535	0.669927	0.778163	0.680018	0.70587	0.0206385		38	76.5	0.274106	0.32465	0.330073	0.221837	0.319982	0.29413	0.0206385		38	76.5	7.29384	7.30092	7.30364	7.29715	7.29936	7.29898	0.00166291		38	76.5	7.24005	7.25137	7.24551	7.24334	7.2448	7.24501	0.00184678
		39	81.5	0.656404	0.69101	0.716428	0.574561	0.7158	0.670841	0.0264429		39	81.5	0.343596	0.30899	0.283572	0.425439	0.2842	0.329159	0.0264429		39	81.5	7.29873	7.29647	7.30219	7.30173	7.30632	7.30109	0.0016719		39	81.5	7.24059	7.25232	7.25128	7.24198	7.24741	7.24671	0.00237332
		40	86.5	0.707418	0.754759	0.64023	0.688948	0.688348	0.69594	0.0184413		40	86.5	0.292582	0.245241	0.35977	0.311052	0.311652	0.30406	0.0184413		40	86.5	7.29969	7.29662	7.29864	7.29809	7.30371	7.29935	0.00119659		40	86.5	7.23965	7.24734	7.24751	7.24008	7.26091	7.2471	0.00384621
		41	91.5	0.74559	0.703211	0.762461	0.566878	0.610877	0.677803	0.038204		41	91.5	0.25441	0.296789	0.237539	0.433122	0.389123	0.322197	0.038204		41	91.5	7.29728	7.29673	7.29888	7.30355	7.30151	7.29959	0.00129222		41	91.5	7.23631	7.24093	7.25222	7.25249	7.24557	7.2455	0.00315625
		42	96.5	0.637487	0.701125	0.708613	0.609136	0.65507	0.662286	0.0189032		42	96.5	0.362513	0.298875	0.291387	0.390864	0.34493	0.337714	0.0189032		42	96.5	7.30067	7.30215	7.3017	7.29936	7.2961	7.3	0.00108574		42	96.5	7.23906	7.25101	7.24719	7.26035	7.24627	7.24878	0.00347967
		43	101.5	0.628055	0.69987	0.625582	0.593722	0.621889	0.633824	0.0176266		43	101.5	0.371945	0.30013	0.374418	0.406278	0.378111	0.366176	0.0176266		43	101.5	7.30357	7.29817	7.30381	7.30337	7.30728	7.30324	0.00145629		43	101.5	7.24645	7.24565	7.25205	7.24315	7.26793	7.25104	0.00446527
		44	106.5	0.60098	0.739266	0.748078	0.656128	0.706479	0.690186	0.0275168		44	106.5	0.39902	0.260734	0.251922	0.343872	0.293521	0.309814	0.0275168		44	106.5	7.30315	7.29805	7.30373	7.29935	7.30202	7.30126	0.00109969		44	106.5	7.24983	7.24803	7.24424	7.24885	7.25373	7.24894	0.00152857
		45	111.5	0.705756	0.72382	0.736746	0.639388	0.723195	0.705781	0.0173141		45	111.5	0.294244	0.27618	0.263254	0.360612	0.276805	0.294219	0.0173141		45	111.5	7.29476	7.29757	7.30253	7.30086	7.29484	7.29811	0.00156981		45	111.5	7.24124	7.24964	7.26654	7.24167	7.23752	7.24732	0.00519416
		46	116.5	0.668717	0.752244	0.709377	0.728594	0.715881	0.714963	0.0136864		46	116.5	0.331283	0.247756	0.290623	0.271406	0.284119	0.285037	0.0136864		46	116.5	7.29373	7.29716	7.29866	7.29401	7.29781	7.29628	0.00101123		46	116.5	7.2295	7.23774	7.24539	7.21507	7.23004	7.23155	0.00503992
		47	121.5	0.788017	0.691284	0.724096	0.684324	0.610707	0.699686	0.0288288		47	121.5	0.211983	0.308716	0.275904	0.315676	0.389293	0.300314	0.0288288		47	121.5	7.27757	7.28966	7.29267	7.28865	7.29003	7.28772	0.00262198		47	121.5	7.17863	7.23338	7.23157	7.22852	7.23828	7.22207	0.0109768
		48	126.5	0.673234	0.692119	0.681208	0.628094	0.601728	0.655277	0.0172606		48	126.5	0.326766	0.307881	0.318792	0.371906	0.398272	0.344723	0.0172606		48	126.5	7.27076	7.28715	7.27594	7.2617	7.28106	7.27532	0.00435573		48	126.5	7.19467	7.23418	7.22582	7.20113	7.22759	7.21668	0.00785924
		49	131.5	0.667847	0.73515	0.809005	0.720352	0.827351	0.751941	0.0294062		49	131.5	0.332153	0.26485	0.190995	0.279648	0.172649	0.248059	0.0294062		49	131.5	7.25003	7.26262	7.24849	7.23171	7.24937	7.24844	0.0049219		49	131.5	7.19095	7.20198	7.17216	7.16826	7.20096	7.18686	0.0070927
		50	136.5	1	0.621316	0.5271	0.732727	0.729466	0.722122	0.0792395		50	136.5	0	0.378684	0.4729	0.267273	0.270534	0.277878	0.0792395		50	136.5	7.2096	7.2329	7.23482	7.21424	7.22961	7.22423	0.00514751		50	136.5		7.13275	7.19411	7.16625	7.17783	7.16774	0.0129855
		51	141.5	1	0.749812	0.797233	0.825649	0.81137	0.836813	0.0427421		51	141.5	0	0.250188	0.202767	0.174351	0.18863	0.163187	0.0427421		51	141.5	7.19657	7.22074	7.20824	7.21643	7.21088	7.21057	0.00411908		51	141.5		7.13129	7.15422	7.14077	7.16313	7.14735	0.00705561
		52	146.5	0.681301	0.780458	0.748154	0.805179	0.964065	0.795831	0.0469131		52	146.5	0.318699	0.219542	0.251846	0.194821	0.035935	0.204169	0.0469131		52	146.5	7.20703	7.20706	7.20439	7.20041	7.20619	7.20502	0.0012491		52	146.5	7.14279	7.13831	7.13662	7.15749	7.14551	7.14414	0.00369127
		53	151.5	0.766108	0.772225	0.805466	0.730987	0.915734	0.798104	0.0316931		53	151.5	0.233892	0.227775	0.194534	0.269013	0.0842663	0.201896	0.0316931		53	151.5	7.19602	7.2019	7.20131	7.19929	7.20093	7.19989	0.00106062		53	151.5	7.1381	7.14379	7.13527	7.14656	7.14478	7.1417	0.00214069
		54	156.5	0.743497	0.806393	0.778929	0.782129	0.804155	0.78302	0.0113415		54	156.5	0.256503	0.193607	0.221071	0.217871	0.195845	0.21698	0.0113415		54	156.5	7.19496	7.19748	7.20133	7.20054	7.20573	7.20001	0.00182524		54	156.5	7.14052	7.14159	7.1416	7.14279	7.14208	7.14171	0.000371077
		55	161.5	0.732089	0.777764	0.769298	0.721131	0.743362	0.748729	0.0108015		55	161.5	0.267911	0.222236	0.230702	0.278869	0.256638	0.251271	0.0108015		55	161.5	7.19727	7.19782	7.20175	7.20475	7.20435	7.20119	0.00157751		55	161.5	7.14163	7.1393	7.13836	7.14537	7.1468	7.14229	0.0016538
		56	166.5	0.759286	0.776795	0.769185	0.763784	0.818571	0.777524	0.0106684		56	166.5	0.240714	0.223205	0.230815	0.236216	0.181429	0.222476	0.0106684		56	166.5	7.19674	7.19882	7.20014	7.20398	7.20468	7.20087	0.00151606		56	166.5	7.14131	7.13651	7.13655	7.14614	7.14411	7.14092	0.00195077
		57	171.5	0.757332	0.736227	0.741718	0.795029	0.820248	0.770111	0.0162052		57	171.5	0.242668	0.263773	0.258282	0.204971	0.179752	0.229889	0.0162052		57	171.5	7.19648	7.19725	7.20248	7.20184	7.19979	7.19957	0.00119595		57	171.5	7.13948	7.13835	7.14249	7.13917	7.14741	7.14138	0.00166147
		58	176.5	0.728323	0.735989	0.763432	0.751492	0.836537	0.763155	0.0193291		58	176.5	0.271677	0.264011	0.236568	0.248508	0.163463	0.236845	0.0193291		58	176.5	7.19648	7.19622	7.19964	7.20097	7.19973	7.19861	0.000952833		58	176.5	7.13832	7.13747	7.13474	7.14177	7.13897	7.13825	0.00113784
		59	181.5	0.712188	0.738872	0.768976	0.783892	0.78282	0.75735	0.0139093		59	181.5	0.287812	0.261128	0.231024	0.216108	0.21718	0.24265	0.0139093		59	181.5	7.19421	7.19547	7.19921	7.19979	7.20319	7.19838	0.00160778		59	181.5	7.13119	7.13518	7.13974	7.13696	7.1511	7.13883	0.00336577
		60	186.5	0.71441	0.7624	0.786449	0.772049	0.724434	0.751948	0.0139101		60	186.5	0.28559	0.2376	0.213551	0.227951	0.275566	0.248052	0.0139101		60	186.5	7.19619	7.19554	7.19753	7.19857	7.20295	7.19816	0.00130745		60	186.5	7.13314	7.13783	7.13871	7.13971	7.14847	7.13957	0.0024923
		61	191.5	0.72932	0.746078	0.762775	0.797356	0.801745	0.767455	0.0141473		61	191.5	0.27068	0.253922	0.237225	0.202644	0.198255	0.232545	0.0141473		61	191.5	7.20044	7.19624	7.19978	7.19906	7.19974	7.19905	0.000736045		61	191.5	7.13848	7.13643	7.14195	7.14187	7.13983	7.13971	0.00104751
		62	196.5	0.729341	0.725916	0.763576	0.775225	0.807947	0.760401	0.0152387		62	196.5	0.270659	0.274084	0.236424	0.224775	0.192053	0.239599	0.0152387		62	196.5	7.19512	7.19512	7.20013	7.19852	7.20354	7.19849	0.00159611		62	196.5	7.13329	7.13712	7.14464	7.14023	7.13752	7.13856	0.001881
		63	201.5	0.770331	0.728686	0.769364	0.800661	0.755143	0.764837	0.0116938		63	201.5	0.229669	0.271314	0.230636	0.199339	0.244857	0.235163	0.0116938		63	201.5	7.19584	7.19654	7.20096	7.20175	7.20393	7.1998	0.00155774		63	201.5	7.13606	7.13537	7.13461	7.14151	7.14891	7.13929	0.00269361
		64	206.5	0.737544	0.74132	0.718946	0.761198	0.75584	0.74297	0.00744045		64	206.5	0.262456	0.25868	0.281054	0.238802	0.24416	0.25703	0.00744045		64	206.5	7.19444	7.19648	7.20153	7.20036	7.20211	7.19898	0.00150109		64	206.5	7.13711	7.13446	7.14186	7.14116	7.13612	7.13814	0.00144297
		65	211.5	0.736505	0.739139	0.771063	0.696266	0.784203	0.745435	0.0153245		65	211.5	0.263495	0.260861	0.228937	0.303734	0.215797	0.254565	0.0153245		65	211.5	7.19445	7.19551	7.19809	7.1982	7.20168	7.19759	0.00125621		65	211.5	7.13367	7.13653	7.13665	7.14172	7.13874	7.13746	0.00133653
		66	216.5	0.7473	0.744291	0.758278	0.68474	0.765258	0.739973	0.0143133		66	216.5	0.2527	0.255709	0.241722	0.31526	0.234742	0.260027	0.0143133		66	216.5	7.19324	7.19572	7.19977	7.20536	7.20323	7.19946	0.00225674		66	216.5	7.13479	7.13722	7.13578	7.14398	7.14475	7.1393	0.0021053
		67	221.5	0.71894	0.731775	0.766006	0.818306	0.796291	0.766264	0.0187604		67	221.5	0.28106	0.268225	0.233994	0.181694	0.203709	0.233736	0.0187604		67	221.5	7.19215	7.19713	7.20005	7.19862	7.20226	7.19804	0.00169832		67	221.5	7.13745	7.1368	7.14263	7.14036	7.14234	7.13991	0.00120844
		68	226.5	0.68517	0.71754	0.761307	0.708405	0.788518	0.732188	0.0187242		68	226.5	0.31483	0.28246	0.238693	0.291595	0.211482	0.267812	0.0187242		68	226.5	7.1946	7.19482	7.20023	7.20003	7.20128	7.19819	0.00143855		68	226.5	7.13441	7.13796	7.14391	7.14467	7.13637	7.13946	0.00205307
