# Supplementary material for: Myosin-based regulation of twitch and tetanic contractions in mammalian skeletal muscle
Source: eLife. 2021 Jun 14;10:e68211. doi: 10.7554/eLife.68211 (PMC8275128; doi:10.7554/eLife.68211)
Supplement: Figure 5—source data 1. [file elife-68211-fig5-data1.xlsx]

## Sheet: 1D Profiles - M3
		Rest		Early Activation		Peak Force		Mechanically Relaxed
Key	Reciprocal Spacing (nm-1)	Mean Twitch Intensity	Mean Tetanus Intensity	Mean Twitch Intensity	Mean Tetanus Intensity	Mean Twitch Intensity	Mean Tetanus Intensity	Mean Twitch Intensity	Mean Tetanus Intensity
Rest	0.063991	8.18884e-05	0.000130607	0.000256812	0.000200508	0.000440975	0.000662412	0.00028856	0.000277911
Early Activation	0.0642008	0.000283992	0.000277533	5.04628e-05	0.000225885	0.000357335	0.000594147	0.000476902	0.000498158
Peak Force	0.0644106	0.000617854	0.000633597	6.72855e-05	0.000198246	0.000365482	0.000470094	0.000685408	0.000689858
Mechanically Relaxed	0.0646204	0.000814078	0.000921588	0.000189149	0.000211414	0.000400891	0.000502106	0.000918434	0.000709553
	0.0648302	0.000647073	0.000732138	0.000199079	0.000344314	0.000401876	0.000596268	0.000646727	0.00059598
	0.06504	0.000334345	0.000378624	0.000263156	0.000457084	0.000274681	0.00064765	0.000490159	0.000428156
	0.0652498	0.000103529	0.000162734	0.000412124	0.000389626	0.000349842	0.000490079	0.000360997	0.000485075
	0.0654596	0.000160626	0.000184423	0.000311145	0.000385823	0.000334285	0.000481687	0.000413523	0.000558253
	0.0656694	0.000316366	0.000378206	0.000320534	0.000271061	0.000363646	0.000479499	0.000448726	0.000526952
	0.0658792	0.000542165	0.000614262	0.000582513	0.000588655	0.000528452	0.000582212	0.00064416	0.000530694
	0.0660891	0.000538777	0.000638393	0.000544338	0.000504884	0.000495539	0.000408695	0.00073269	0.000610922
	0.0662989	0.00044066	0.00047837	0.000525218	0.000617651	0.000522279	0.000321867	0.000589997	0.000722505
	0.0665087	0.000257595	0.00034434	0.000318755	0.000556247	0.000533177	0.000482317	0.000541048	0.000751333
	0.0667185	0.000222133	0.000315942	0.000261717	0.000478762	0.00067341	0.00075061	0.000579968	0.000679195
	0.0669283	0.000222993	0.00028759	0.000601702	0.000495566	0.000802475	0.000988482	0.000497081	0.000496408
	0.0671381	0.000297644	0.000373911	0.000762854	0.000907878	0.00102698	0.00123616	0.000465492	0.000406239
	0.0673479	0.000243131	0.000344596	0.00134779	0.00121786	0.00110356	0.00152077	0.000460381	0.000368984
	0.0675577	0.000185332	0.000195824	0.00119388	0.00122385	0.00092375	0.00300555	0.000362797	0.000436782
	0.0677675	0.000108151	0.000166452	0.000902822	0.000937423	0.00087046	0.00776523	0.000360277	0.000557149
	0.0679773	8.94022e-05	0.000154111	0.000528422	0.000593493	0.00121451	0.0167738	0.000423442	0.000686308
	0.0681871	0.000292019	0.000304244	0.000413859	0.000553435	0.00197043	0.0253823	0.000556288	0.000730599
	0.0683969	0.000598221	0.000585003	0.000513371	0.000626724	0.00287287	0.0259792	0.000724102	0.000716832
	0.0686067	0.00087688	0.00082417	0.000891706	0.000933508	0.00300951	0.0179671	0.000763419	0.000695019
	0.0688165	0.00102528	0.000971167	0.000980791	0.00116767	0.00234816	0.0134145	0.00100447	0.00096876
	0.0690263	0.00238665	0.00212729	0.00181067	0.00194595	0.00298422	0.0183176	0.00245628	0.00225316
	0.0692361	0.00655525	0.00596526	0.00468743	0.00497639	0.00554055	0.0222555	0.00633359	0.00507454
	0.069446	0.0119527	0.0113935	0.00814488	0.00864181	0.00758559	0.0174801	0.0110875	0.00865386
	0.0696558	0.0135359	0.0134694	0.00877319	0.00977446	0.00628143	0.00885872	0.0127495	0.0104314
	0.0698656	0.00960369	0.0101202	0.00614872	0.00674392	0.00377893	0.00367196	0.00932152	0.00819283
	0.0700754	0.00405763	0.00447079	0.00248668	0.00294657	0.00211045	0.00205156	0.00411428	0.0041913
	0.0702852	0.00185781	0.00195829	0.00154675	0.00201482	0.00169269	0.00160421	0.00187396	0.00196533
	0.070495	0.00230957	0.00234756	0.00203746	0.00200509	0.00154008	0.00213075	0.00221514	0.00211088
	0.0707048	0.00226737	0.00237645	0.00159861	0.00193655	0.00114366	0.00218585	0.00224992	0.0022702
	0.0709146	0.00113987	0.00122622	0.00083695	0.000837921	0.000756908	0.00159831	0.00129731	0.00148457
	0.0711244	0.000372796	0.000435176	0.000374125	0.000385405	0.000448818	0.000868652	0.000556718	0.000722157
	0.0713342	0.000200735	0.000217982	0.000160415	0.000411978	0.000366184	0.000684448	0.000338263	0.000423289
	0.071544	0.000139529	0.000134859	0.000209856	0.000304239	0.000271232	0.000552421	0.000269594	0.000367836
	0.0717538	0.000151176	0.000236617	0.000209205	0.000303521	0.000312066	0.000650571	0.000251522	0.000321264
	0.0719636	0.000205087	0.000212911	0.000176997	0.00024805	0.000301311	0.000588479	0.000227206	0.000242847

## Sheet: Figure 5 Source Data
				FIGURE 5 C										FIGURE 5 D										FIGURE 5 E										FIGURE 5 E										FIGURE 5 E
Key			IM3	Twitch									SM3	Twitch									STAR M3	Twitch									LM3	Twitch									MM3	Twitch
Rest		Frame No.	Time (ms)	M06_IM3	M12_IM3	M23_IM3	M24_IM3	Mean	SE			Frame No.	Time (ms)	M06_SM3	M12_SM3	M23_SM3	M24_SM3	Mean	SE			Frame No.	Time (ms)	M06_LLM3	M12_LLM3	M23_LLM3	M24_LLM3	Mean	SE			Frame No.	Time (ms)	M06_LM3	M12_LM3	M23_LM3	M24_LM3	Mean	SE			Frame No.	Time (ms)	M06_MM3	M12_MM3	M23_MM3	M24_MM3	Mean	SE
Early Activation		19	-18.5	0.994606	0.898164	1.02521	1.04931	0.991823	0.0331659			19	-18.5	14.3376	14.3339	14.3545	14.3474	14.3433	0.00469137			19	-18.5	0	0	0	0	0	0			19	-18.5	0.0270679	0.035182	0.0494274	0.0455112	0.0392971	0.00506397			19	-18.5	0.847797	0.826534	0.832623	0.842571	0.837381	0.00479333
Peak Force		20	-13.5	0.993576	1.03226	0.970684	0.97934	0.993964	0.0136087			20	-13.5	14.3371	14.3373	14.3553	14.3454	14.3438	0.00430849			20	-13.5	0	0	0	0	0	0			20	-13.5	0.0257013	0.0273216	0.0792191	0.028028	0.0400675	0.0130596			20	-13.5	0.848148	0.845451	0.804879	0.86014	0.839654	0.0120232
Isometric Relaxation		21	-8.5	0.983892	1.03627	1.00198	1.01297	1.00878	0.0109513			21	-8.5	14.3358	14.336	14.3553	14.3438	14.3427	0.00457898			21	-8.5	0	0	0	0	0	0			21	-8.5	0.0243605	0.0264278	0.0580192	0.0570869	0.0414736	0.00929501			21	-8.5	0.847752	0.844349	0.82978	0.814635	0.834129	0.00757711
Chaotic Relaxation		22	-3.5	1.02787	1.03633	1.00212	0.959227	1.00639	0.0173223			22	-3.5	14.3379	14.3381	14.3559	14.3474	14.3448	0.00432003			22	-3.5	0	0	0	0	0	0			22	-3.5	0.0291315	0.0311878	0.0492696	0.0450006	0.0386474	0.00499494			22	-3.5	0.843288	0.8399	0.837869	0.840684	0.840435	0.00112075
Mechanically Relaxed		23	1.5	1.01604	1.06089	0.789597	0.940198	0.951682	0.0594927			23	1.5	14.3306	14.3309	14.3326	14.3374	14.3329	0.00157822			23	1.5	0	0	0	0	0	0			23	1.5	0.0214576	0.0238932	0.0624065	0.0276082	0.0338414	0.0096053			23	1.5	0.838465	0.834696	0.793588	0.823296	0.822511	0.0101661
		24	6.5	0.922046	0.850775	0.673656	0.539865	0.746585	0.0864551			24	6.5	14.3756	14.3778	14.4057	14.3489	14.377	0.0116093			24	6.5	0.0816649	0.0855095	0.11268	0	0.0699635	0.024321			24	6.5	0.0298116	0.0327517	0.0544713	0.0735094	0.047636	0.0102283			24	6.5	0.739287	0.730822	0.729728	0.799577	0.749853	0.0167115
		25	11.5	0.998633	0.935618	0.524729	0.442266	0.725311	0.14121			25	11.5	14.4388	14.4396	14.432	14.4305	14.4352	0.0023343			25	11.5	0.0941957	0.0960923	0.0691588	0	0.0648617	0.0224747			25	11.5	0.158321	0.159061	0.177563	0.319774	0.20368	0.0389532			25	11.5	0.616854	0.613413	0.668915	0.570611	0.617448	0.0201228
		26	16.5	0.902675	0.808827	0.525712	0.401742	0.659739	0.117534			26	16.5	14.4092	14.4089	14.4011	14.438	14.4143	0.00812519			26	16.5	0	0	0	0	0	0			26	16.5	0.204427	0.205999	0.221293	0.311354	0.235768	0.0254807			26	16.5	0.673747	0.669904	0.667842	0.615827	0.65683	0.0137223
		27	21.5	0.730721	0.6385	0.498123	0.532115	0.599865	0.0528815			27	21.5	14.3766	14.3765	14.3726	14.3759	14.3754	0.00094404			27	21.5	0	0	0	0	0	0			27	21.5	0.152869	0.154433	0.119327	0.209186	0.158954	0.018599			27	21.5	0.719091	0.715933	0.758807	0.659724	0.713389	0.0203751
		28	26.5	0.733701	0.611897	0.525382	0.386784	0.564441	0.0730232			28	26.5	14.356	14.3836	14.3486	14.3679	14.364	0.00765399			28	26.5	0	0	0	0	0	0			28	26.5	0.0957462	0.209038	0.0996154	0.129412	0.133453	0.0262936			28	26.5	0.779562	0.679238	0.78268	0.750979	0.748115	0.0240414
		29	31.5	0.771822	0.671604	0.534428	0.709078	0.671733	0.0502205			29	31.5	14.3326	14.3593	14.3223	14.3489	14.3408	0.00825424			29	31.5	0	0	0	0	0	0			29	31.5	0.0455281	0.136867	0.0243558	0.0918817	0.0746582	0.0250757			29	31.5	0.823234	0.74306	0.792288	0.75925	0.779458	0.0178282
		30	36.5	0.855817	0.737293	0.710965	0.585136	0.722303	0.0555234			30	36.5	14.3309	14.3415	14.3436	14.3412	14.3393	0.0028345			30	36.5	0	0	0	0	0	0			30	36.5	0.0378494	0.070928	0.0450931	0.0545051	0.0520939	0.00714408			30	36.5	0.815391	0.791185	0.824485	0.795426	0.806622	0.0079562
		31	41.5	0.904053	0.782403	0.751751	0.694685	0.783223	0.0441871			31	41.5	14.3317	14.3387	14.3425	14.3497	14.3407	0.00375908			31	41.5	0	0	0	0	0	0			31	41.5	0.039545	0.0383818	0.0382175	0.0507087	0.0417132	0.00301302			31	41.5	0.814824	0.816309	0.802678	0.833666	0.816869	0.0063772
		32	46.5	0.919506	0.821157	0.795684	0.830288	0.841659	0.0269621			32	46.5	14.3346	14.3347	14.3528	14.3344	14.3392	0.00455924			32	46.5	0	0	0	0	0	0			32	46.5	0.0265143	0.0263165	0.0453228	0.0578257	0.0389948	0.00769819			32	46.5	0.851887	0.852161	0.834985	0.791005	0.832509	0.0144062
		33	51.5	0.911787	0.864917	0.812879	0.90352	0.873276	0.0225747			33	51.5	14.3351	14.3351	14.3417	14.3418	14.3384	0.00192758			33	51.5	0	0	0	0	0	0			33	51.5	0.0264296	0.0262299	0.0314462	0.0341452	0.0295627	0.00194659			33	51.5	0.851203	0.851563	0.821432	0.834901	0.839775	0.00724454
		34	56.5	0.939519	0.913129	0.797137	0.917528	0.891828	0.0320872			34	56.5	14.3355	14.3356	14.3489	14.3491	14.3422	0.00387585			34	56.5	0	0	0	0	0	0			34	56.5	0.028684	0.0308205	0.0538404	0.0557709	0.042279	0.00725614			34	56.5	0.84219	0.838821	0.827327	0.808235	0.829143	0.00766121
		35	61.5	0.927993	0.963074	0.83549	0.891148	0.904426	0.0272694			35	61.5	14.3383	14.3386	14.3465	14.3328	14.339	0.00283136			35	61.5	0	0	0	0	0	0			35	61.5	0.0297088	0.0330556	0.0360269	0	0.0246978	0.00833314			35	61.5	0.856393	0.850717	0.833612	0.860518	0.85031	0.00591737
		36	66.5	0.965424	0.986228	0.872116	0.962668	0.946609	0.0253817			36	66.5	14.3351	14.3353	14.3521	14.3468	14.3423	0.00425424			36	66.5	0	0	0	0	0	0			36	66.5	0.0242674	0.0269504	0.0416121	0.0558956	0.0371814	0.00731035			36	66.5	0.853847	0.849366	0.836431	0.814527	0.838543	0.00881563
		37	71.5	0.974205	1.00211	0.878241	0.911932	0.941621	0.028312			37	71.5	14.3364	14.3367	14.3495	14.3421	14.3412	0.00307564			37	71.5	0	0	0	0	0	0			37	71.5	0.0185865	0.0213941	0.0552869	0.0371049	0.0330931	0.00844573			37	71.5	0.870348	0.865832	0.822513	0.819541	0.844559	0.0136306
		38	76.5	0.981071	1.00323	0.91923	0.946156	0.962421	0.018581			38	76.5	14.3338	14.334	14.3574	14.3451	14.3426	0.00561125			38	76.5	0	0	0	0	0	0			38	76.5	0.0295243	0.0317141	0.0760868	0.0351146	0.04311	0.0110523			38	76.5	0.840658	0.837001	0.788251	0.842154	0.827016	0.012967
		39	81.5	0.997883	1.0376	0.866321	0.982275	0.971019	0.0367911			39	81.5	14.3362	14.3364	14.3545	14.3452	14.3431	0.00435579			39	81.5	0	0	0	0	0	0			39	81.5	0.0239112	0.0256114	0.0542051	0.0241323	0.031965	0.00742295			39	81.5	0.854836	0.852029	0.852029	0.860915	0.854952	0.0020947
		40	86.5	0.999094	0.989799	0.828426	1.03437	0.962922	0.0458486			40	86.5	14.3336	14.3337	14.3503	14.3437	14.3403	0.00408873			40	86.5	0	0	0	0	0	0			40	86.5	0.0213044	0.0231245	0.0366948	0.0330526	0.0285441	0.00374773			40	86.5	0.849552	0.846637	0.847087	0.844423	0.846925	0.00105169
		41	91.5	0.985195	0.973783	0.777376	0.932439	0.917198	0.0479651			41	91.5	14.3363	14.3365	14.3537	14.3444	14.3427	0.00411103			41	91.5	0	0	0	0	0	0			41	91.5	0.011271	0.0125904	0.0343514	0.0461908	0.0261009	0.00853491			41	91.5	0.875031	0.872595	0.855395	0.831636	0.858664	0.0100131
		42	96.5	0.986567	0.951273	0.86925	0.932457	0.934887	0.0245856			42	96.5	14.3384	14.3386	14.3479	14.3473	14.3431	0.00262401			42	96.5	0	0	0	0	0	0			42	96.5	0.0254404	0.0280262	0.0455356	0.0247658	0.030942	0.00491501			42	96.5	0.861047	0.856628	0.825439	0.862899	0.851504	0.00878705
				FIGURE 5 C										FIGURE 5 D										FIGURE 5 E										FIGURE 5 E										FIGURE 5 E
			IM3	Tetanus									SM3	Tetanus									STAR M3	Tetanus									LM3	Tetanus									MM3	Tetanus
		Frame No.	Time (ms)	M05_IM3	M10_IM3	M11_IM3	M23_IM3	M24_IM3	Mean	SE		Frame No.	Time (ms)	M05_SM3	M10_SM3	M11_SM3	M23_SM3	M24_SM3	Mean	SE		Frame No.	Time (ms)	M05_LLM3	M10_LLM3	M11_LLM3	M23_LLM3	M24_LLM3	Mean	SE		Frame No.	Time (ms)	M05_LM3	M10_LM3	M11_LM3	M23_LM3	M24_LM3	Mean	SE		Frame No.	Time (ms)	M05_MM3	M10_MM3	M11_MM3	M23_MM3	M24_MM3	Mean
		19	-18.5	1.01088	0.98878	1.0293	1.08071	1.03763	1.02946	0.0153194		19	-18.5	14.3322	14.3347	14.3352	14.3509	14.3456	14.3397	0.00362372		19	-18.5	0	0	0	0	0	0	0		19	-18.5	0.0376955	0.0321314	0.0283862	0.071607	0.0696726	0.0478985	0.00940649		19	-18.5	0.822109	0.843353	0.840558	0.792708	0.813563	0.822458
		20	-13.5	0.976462	1.00086	1.02796	0.95617	1.01671	0.995633	0.0131179		20	-13.5	14.331	14.3331	14.3381	14.3533	14.34	14.3391	0.00390236		20	-13.5	0	0	0	0	0	0	0		20	-13.5	0.0250464	0.0273402	0.0287252	0.0683172	0.0237436	0.0346345	0.00846521		20	-13.5	0.841154	0.846233	0.848909	0.816319	0.86746	0.844015
		21	-8.5	0.991517	1.00258	0.988452	0.964831	0.947901	0.979056	0.00992446		21	-8.5	14.3322	14.3318	14.3349	14.3533	14.3475	14.3399	0.00439898		21	-8.5	0	0	0	0	0	0	0		21	-8.5	0.0355148	0.0235762	0.0324583	0.0684778	0.0506978	0.042145	0.00790302		21	-8.5	0.831803	0.846304	0.84664	0.814874	0.838975	0.835719
		22	-3.5	1.02033	1.00765	0.954495	0.999744	0.995905	0.995626	0.0110994		22	-3.5	14.3373	14.331	14.3358	14.3416	14.3433	14.3378	0.00218263		22	-3.5	0	0	0	0	0	0	0		22	-3.5	0.0330534	0.0258038	0.0244494	0.0475985	0.040594	0.0342998	0.00440021		22	-3.5	0.845616	0.847545	0.853861	0.792999	0.8475	0.837504
		23	1.5	1.0812	1.01991	0.968998	1.12839	1.02368	1.04444	0.0274986		23	1.5	14.3331	14.323	14.3289	14.3474	14.3428	14.335	0.00446908		23	1.5	0	0	0	0	0	0	0		23	1.5	0.0370845	0.0230459	0.0249652	0.0475471	0.0410097	0.0347305	0.00469643		23	1.5	0.822982	0.820895	0.831081	0.769279	0.841972	0.817242
		24	6.5	1.0311	0.860752	0.734555	0.876883	0.601064	0.820871	0.0723498		24	6.5	14.3522	14.3787	14.3996	14.4033	14.3966	14.3861	0.00947906		24	6.5	0.0441175	0.0818727	0.111615	0.108093	0.0820766	0.0855549	0.0121033		24	6.5	0.0704767	0.0242801	0.0497062	0.0696984	0.0907408	0.0609804	0.0112381		24	6.5	0.734293	0.740129	0.709906	0.702886	0.724579	0.722359
		25	11.5	1.05089	1.13173	1.03339	1.01177	1.05453	1.05646	0.0202847		25	11.5	14.409	14.4452	14.4649	14.4699	14.491	14.456	0.0138308		25	11.5	0.05555	0.0741794	0.0802511	0.0548567	0.0527952	0.0635265	0.00568835		25	11.5	0.226514	0.279308	0.332578	0.411561	0.513286	0.352649	0.050481		25	11.5	0.600927	0.529893	0.500872	0.482672	0.404156	0.503704
		26	16.5	1.47835	1.66143	1.70193	1.46229	1.402	1.5412	0.0590942		26	16.5	14.4578	14.4851	14.4903	14.507	14.5116	14.4904	0.00954296		26	16.5	0	0	0	0	0	0	0		26	16.5	0.46074	0.502878	0.555452	0.612614	0.634436	0.553224	0.0325695		26	16.5	0.464	0.427239	0.396412	0.346705	0.324952	0.391862
		27	21.5	1.94353	2.22829	2.3985	2.09849	1.74018	2.0818	0.113547		27	21.5	14.4925	14.5186	14.5147	14.5282	14.5318	14.5172	0.00690323		27	21.5	0	0	0	0	0	0	0		27	21.5	0.573004	0.601969	0.614838	0.669928	0.67315	0.626578	0.0195727		27	21.5	0.378093	0.374155	0.352166	0.296698	0.297588	0.33974
		28	26.5	2.27865	2.76129	2.8523	2.47996	2.19936	2.51431	0.128675		28	26.5	14.5033	14.5228	14.5299	14.5325	14.5324	14.5242	0.00550199		28	26.5	0	0	0	0	0	0	0		28	26.5	0.603912	0.600411	0.636582	0.676754	0.643466	0.632225	0.0140391		28	26.5	0.346828	0.372159	0.334852	0.283976	0.320703	0.331704
		29	31.5	2.576	2.88522	3.20201	2.5995	2.38817	2.73018	0.142211		29	31.5	14.5172	14.527	14.534	14.5355	14.5281	14.5284	0.00323682		29	31.5	0	0	0	0	0	0	0		29	31.5	0.595899	0.566378	0.607585	0.629688	0.565348	0.59298	0.0123298		29	31.5	0.366287	0.405192	0.364264	0.337852	0.393593	0.373438
		30	36.5	2.83958	3.00967	3.29002	2.65551	2.37757	2.83447	0.154763		30	36.5	14.5236	14.5291	14.5336	14.5295	14.5388	14.5309	0.00253978		30	36.5	0	0	0	0	0	0	0		30	36.5	0.614896	0.565735	0.609092	0.611655	0.606056	0.601487	0.00905567		30	36.5	0.346549	0.407151	0.358956	0.338731	0.360495	0.362377
		31	41.5	2.99375	3.21309	3.33433	2.73156	2.43257	2.94106	0.163384		31	41.5	14.5237	14.5278	14.5357	14.5317	14.5373	14.5312	0.00250285		31	41.5	0	0	0	0	0	0	0		31	41.5	0.596601	0.553529	0.60473	0.616912	0.577094	0.589773	0.0111383		31	41.5	0.359298	0.411961	0.36025	0.338268	0.389504	0.371856
		32	46.5	3.21251	2.98969	3.46984	2.65949	2.40166	2.94664	0.190492		32	46.5	14.5201	14.5326	14.5355	14.5351	14.5361	14.5319	0.00300376		32	46.5	0	0	0	0	0	0	0		32	46.5	0.550146	0.524318	0.554541	0.568521	0.543028	0.548111	0.00725945		32	46.5	0.405214	0.450207	0.414433	0.401734	0.427229	0.419764
		33	51.5	3.42556	3.32399	3.64887	2.74494	2.5933	3.14733	0.203597		33	51.5	14.5267	14.5289	14.5387	14.5354	14.5352	14.533	0.00223808		33	51.5	0	0	0	0	0	0	0		33	51.5	0.58103	0.535099	0.58333	0.583508	0.54447	0.565487	0.0106062		33	51.5	0.380298	0.433092	0.385849	0.376837	0.42233	0.399681
		34	56.5	3.27846	3.18236	3.71146	2.64426	2.44024	3.05136	0.228436		34	56.5	14.5276	14.5326	14.5374	14.5359	14.5392	14.5345	0.0020428		34	56.5	0	0	0	0	0	0	0		34	56.5	0.53898	0.532985	0.554108	0.582323	0.546753	0.55103	0.00859608		34	56.5	0.420722	0.441954	0.411821	0.380521	0.420274	0.415058
		35	61.5	3.50116	3.20611	3.69134	2.71349	2.52085	3.12659	0.223957		35	61.5	14.5266	14.5305	14.534	14.5341	14.532	14.5314	0.00137647		35	61.5	0	0	0	0	0	0	0		35	61.5	0.536798	0.513056	0.519721	0.543485	0.51983	0.526578	0.0057692		35	61.5	0.419951	0.451255	0.445786	0.422612	0.436765	0.435274
		36	66.5	3.67913	3.42709	3.68005	2.7937	2.67737	3.25147	0.216398		36	66.5	14.5337	14.5343	14.5375	14.5361	14.5332	14.535	0.000800726		36	66.5	0	0	0	0	0	0	0		36	66.5	0.568981	0.545134	0.557406	0.570755	0.532264	0.554908	0.00729294		36	66.5	0.399778	0.431938	0.408483	0.396409	0.427463	0.412814
		37	71.5	3.6209	3.26878	3.96379	2.58001	2.50303	3.1873	0.285885		37	71.5	14.528	14.5303	14.5327	14.5316	14.5386	14.5322	0.00175906		37	71.5	0	0	0	0	0	0	0		37	71.5	0.515656	0.522271	0.531244	0.545715	0.534259	0.529829	0.00515742		37	71.5	0.440141	0.44484	0.426298	0.414023	0.43147	0.431354
		38	76.5	3.70657	3.34651	3.69919	2.72638	2.29137	3.154	0.279875		38	76.5	14.53	14.5309	14.5438	14.5362	14.5355	14.5353	0.00245474		38	76.5	0	0	0	0	0	0	0		38	76.5	0.545698	0.529386	0.535164	0.540164	0.522146	0.534512	0.00410296		38	76.5	0.411364	0.431136	0.435664	0.423425	0.445276	0.429373
		39	81.5	3.79188	3.44736	3.83039	2.6267	2.57888	3.25504	0.274611		39	81.5	14.5292	14.5317	14.5385	14.541	14.5435	14.5368	0.00272179		39	81.5	0	0	0	0	0	0	0		39	81.5	0.548651	0.537231	0.561859	0.58385	0.569463	0.560211	0.00808967		39	81.5	0.41209	0.433553	0.398491	0.382556	0.410325	0.407403
		40	86.5	3.48424	3.30055	3.72421	2.65204	2.54061	3.14033	0.232696		40	86.5	14.5279	14.5334	14.5392	14.5358	14.5381	14.5349	0.00200489		40	86.5	0	0	0	0	0	0	0		40	86.5	0.506942	0.520069	0.532743	0.541667	0.525889	0.525462	0.00586454		40	86.5	0.451472	0.450474	0.42878	0.421461	0.444244	0.439286
		41	91.5	3.50306	3.2365	3.9995	2.7316	2.53247	3.20063	0.264327		41	91.5	14.533	14.5348	14.5421	14.5328	14.5362	14.5358	0.00169365		41	91.5	0	0	0	0	0	0	0		41	91.5	0.549989	0.531345	0.536733	0.542726	0.53098	0.538354	0.0036099		41	91.5	0.410902	0.443001	0.431135	0.41356	0.434825	0.426685
		42	96.5	3.88728	3.52478	3.96071	2.88288	2.58464	3.36806	0.273361		42	96.5	14.5298	14.5295	14.5405	14.5313	14.5353	14.5333	0.00207684		42	96.5	0	0	0	0	0	0	0		42	96.5	0.551691	0.540507	0.555652	0.573655	0.546593	0.55362	0.00561512		42	96.5	0.405687	0.426172	0.413161	0.37855	0.413495	0.407413
		43	101.5	3.54983	3.40036	3.84591	2.56894	2.5242	3.17785	0.267602		43	101.5	14.5277	14.5296	14.542	14.5333	14.5315	14.5328	0.00247218		43	101.5	0	0	0	0	0	0	0		43	101.5	0.513214	0.51991	0.533351	0.518199	0.527299	0.522395	0.00355073		43	101.5	0.439762	0.44718	0.43168	0.446532	0.423599	0.437751
		44	106.5	3.58334	3.34989	3.71529	2.80364	2.44002	3.17844	0.241587		44	106.5	14.5333	14.5327	14.5348	14.5365	14.5394	14.5353	0.00121243		44	106.5	0	0	0	0	0	0	0		44	106.5	0.548964	0.538819	0.529207	0.552347	0.542913	0.54245	0.00405691		44	106.5	0.414138	0.435345	0.430026	0.410978	0.425937	0.423285
		45	111.5	3.2044	2.97498	3.10906	2.37579	2.31861	2.79656	0.187258		45	111.5	14.526	14.5321	14.5387	14.5371	14.5368	14.5341	0.00230655		45	111.5	0	0	0	0	0	0	0		45	111.5	0.482639	0.49927	0.511801	0.518814	0.500533	0.502611	0.00616987		45	111.5	0.477711	0.467563	0.457108	0.448025	0.46465	0.463011
		46	116.5	2.59546	2.67814	2.9509	1.99484	2.03236	2.45034	0.187842		46	116.5	14.5295	14.5304	14.5393	14.5312	14.5391	14.5339	0.00218459		46	116.5	0	0	0	0	0	0	0		46	116.5	0.480843	0.50657	0.482836	0.478076	0.49566	0.488797	0.00537003		46	116.5	0.481774	0.469055	0.484041	0.490701	0.472811	0.479676
		47	121.5	2.13133	2.14352	2.50191	1.36246	1.68579	1.965	0.198597		47	121.5	14.5247	14.5279	14.5281	14.5147	14.5415	14.5274	0.00428134		47	121.5	0	0	0	0	0	0	0		47	121.5	0.498161	0.493473	0.510566	0.585785	0.542005	0.525998	0.0171779		47	121.5	0.472658	0.472414	0.453681	0.37677	0.45172	0.445449
		48	126.5	1.46375	1.5311	1.55031	0.792927	1.29005	1.32563	0.140856		48	126.5	14.4873	14.5147	14.4936	14.4846	14.5244	14.5009	0.00789827		48	126.5	0	0	0	0	0	0	0		48	126.5	0.552028	0.643448	0.638101	0.613152	0.661333	0.621612	0.0190262		48	126.5	0.387922	0.33224	0.317315	0.335289	0.319229	0.338399
		49	131.5	0.998276	1.03217	0.736008	0.723505	0.5808	0.814152	0.0866636		49	131.5	14.4437	14.4779	14.4484	14.4705	14.4558	14.4593	0.00649943		49	131.5	0	0	0	0	0	0	0		49	131.5	0.46559	0.577299	0.502182	0.49653	0.5229	0.5129	0.0185315		49	131.5	0.445083	0.368506	0.432247	0.422514	0.378257	0.409321
		50	136.5	0.9183	0.64742	0.962627	1.09119	0.710728	0.866052	0.0820571		50	136.5	14.3654	14.4535	14.4091	14.3958	14.3849	14.4017	0.0147894		50	136.5	0	0	0	0	0	0	0		50	136.5	0.229196	0.434777	0.218749	0.270718	0.325258	0.295739	0.039487		50	136.5	0.599649	0.475015	0.722755	0.606726	0.545494	0.589928
		51	141.5	0.741052	1.08926	0.649484	0.521233	0.391407	0.678487	0.118456		51	141.5	14.3574	14.4056	14.3682	14.3481	14.3447	14.3648	0.0109813		51	141.5	0	0	0	0	0	0	0		51	141.5	0.172199	0.273462	0.13779	0.107995	0.16671	0.171632	0.0279184		51	141.5	0.676592	0.641914	0.69594	0.70881	0.713502	0.687352
		52	146.5	0.929649	0.711252	0.516932	0.606602	0.560264	0.66494	0.0736487		52	146.5	14.3314	14.3754	14.3467	14.3488	14.3843	14.3573	0.00976872		52	146.5	0	0	0	0	0	0	0		52	146.5	0.105686	0.149786	0.0790619	0.132001	0.18197	0.129701	0.0177226		52	146.5	0.712859	0.72815	0.752062	0.683203	0.657392	0.706733
		53	151.5	0.749823	0.694712	0.720164	0.620642	0.699672	0.697003	0.0214124		53	151.5	14.3363	14.335	14.3501	14.3372	14.3661	14.3449	0.00594604		53	151.5	0	0	0	0	0	0	0		53	151.5	0.0846886	0.0896309	0.0855264	0.0507239	0.116481	0.0854102	0.0104568		53	151.5	0.751949	0.743493	0.759098	0.793688	0.759204	0.761486
		54	156.5	0.725377	0.770782	0.789795	0.76279	0.603238	0.730397	0.0334685		54	156.5	14.3253	14.338	14.357	14.3501	14.3417	14.3424	0.00539801		54	156.5	0	0	0	0	0	0	0		54	156.5	0.042357	0.0593128	0.0895562	0.0785339	0.075827	0.0691174	0.00825736		54	156.5	0.771082	0.788765	0.770052	0.786473	0.755823	0.774439
		55	161.5	0.867109	0.763286	0.775179	0.78412	0.76701	0.791341	0.0192785		55	161.5	14.3394	14.3415	14.3433	14.3473	14.3459	14.3435	0.00143931		55	161.5	0	0	0	0	0	0	0		55	161.5	0.0709208	0.062326	0.068966	0.0697918	0.0676315	0.0679272	0.00149965		55	161.5	0.765939	0.794903	0.789926	0.779118	0.779427	0.781863
		56	166.5	0.784929	0.802585	0.699615	0.772668	0.661008	0.744161	0.0271908		56	166.5	14.3341	14.3399	14.3285	14.3573	14.3441	14.3408	0.0048989		56	166.5	0	0	0	0	0	0	0		56	166.5	0.0475802	0.0518715	0.024293	0.0901409	0.0461386	0.0520048	0.0106684		56	166.5	0.79451	0.803737	0.796028	0.727158	0.825898	0.789466
		57	171.5	0.835873	0.7821	0.813781	0.80419	0.729839	0.793157	0.0180321		57	171.5	14.3392	14.3366	14.3417	14.3505	14.3398	14.3416	0.00238179		57	171.5	0	0	0	0	0	0	0		57	171.5	0.0464488	0.0455364	0.0639173	0.0848807	0.0730933	0.0627753	0.00761626		57	171.5	0.825418	0.809914	0.795982	0.773727	0.802906	0.801589
		58	176.5	0.851175	0.770272	0.83249	0.802496	0.742344	0.799755	0.01986		58	176.5	14.3299	14.3342	14.3517	14.3287	14.3508	14.3391	0.00506691		58	176.5	0	0	0	0	0	0	0		58	176.5	0.0254631	0.0412068	0.0785713	0.0499896	0.065272	0.0521006	0.00923817		58	176.5	0.835688	0.812712	0.775964	0.790106	0.814867	0.805868
		59	181.5	0.843666	0.796248	0.797743	0.747904	0.765764	0.790265	0.0163373		59	181.5	14.3374	14.3401	14.3487	14.3439	14.3526	14.3445	0.00276561		59	181.5	0	0	0	0	0	0	0		59	181.5	0.0440005	0.0497088	0.0745697	0.0755619	0.0662165	0.0620115	0.00646048		59	181.5	0.821842	0.810969	0.802533	0.776682	0.811091	0.804623
		60	186.5	0.789576	0.831618	0.835707	0.818425	0.717079	0.798481	0.0218942		60	186.5	14.3375	14.3331	14.3382	14.3444	14.3536	14.3414	0.00354344		60	186.5	0	0	0	0	0	0	0		60	186.5	0.0417469	0.0356716	0.0454924	0.0634934	0.071968	0.0516745	0.00687162		60	186.5	0.830386	0.824065	0.803313	0.789189	0.807895	0.81097
		61	191.5	0.884203	0.819464	0.825132	0.898315	0.912556	0.867934	0.0191836		61	191.5	14.3349	14.3313	14.3391	14.3368	14.3501	14.3384	0.00317343		61	191.5	0	0	0	0	0	0	0		61	191.5	0.0525107	0.0277117	0.0516673	0.0583065	0.0699687	0.052033	0.00690266		61	191.5	0.805018	0.834775	0.814269	0.775269	0.801228	0.806112
		62	196.5	0.882805	0.854657	0.805351	0.870213	0.723643	0.827334	0.0290665		62	196.5	14.3328	14.3324	14.3436	14.3504	14.3387	14.3396	0.00339673		62	196.5	0	0	0	0	0	0	0		62	196.5	0.0417826	0.0288994	0.068538	0.0740631	0.046308	0.0519182	0.00845778		62	196.5	0.81561	0.83417	0.799172	0.774495	0.797922	0.804274
		63	201.5	0.777186	0.837139	0.848219	0.821673	0.734971	0.803838	0.0210353		63	201.5	14.3365	14.3358	14.3439	14.353	14.3496	14.3438	0.00344252		63	201.5	0	0	0	0	0	0	0		63	201.5	0.0274943	0.0332138	0.0399589	0.0737993	0.0690988	0.048713	0.00951839		63	201.5	0.838305	0.841129	0.831594	0.790941	0.784689	0.817332
		64	206.5	0.817863	0.838956	0.774952	0.903223	0.780965	0.823192	0.0232294		64	206.5	14.3327	14.3363	14.3384	14.3481	14.3478	14.3407	0.00311787		64	206.5	0	0	0	0	0	0	0		64	206.5	0.021316	0.039404	0.0403778	0.0785559	0.0552896	0.0469886	0.00955434		64	206.5	0.849606	0.824249	0.822033	0.777656	0.82501	0.819711
		65	211.5	0.789491	0.860456	0.859672	0.783482	0.783692	0.815359	0.0182832		65	211.5	14.3231	14.3331	14.343	14.352	14.3299	14.3362	0.00508759		65	211.5	0	0	0	0	0	0	0		65	211.5	0.0414219	0.0316275	0.0503632	0.0908569	0.025029	0.0478597	0.0115784		65	211.5	0.801962	0.835921	0.807789	0.785445	0.834273	0.813078
		66	216.5	0.757902	0.844012	0.748509	0.836757	0.779879	0.793412	0.019874		66	216.5	14.3375	14.3322	14.3226	14.3427	14.3491	14.3368	0.00452845		66	216.5	0	0	0	0	0	0	0		66	216.5	0.0426522	0.0339719	0	0.0549009	0.0439414	0.0350933	0.00938234		66	216.5	0.826918	0.822312	0.847293	0.78136	0.851275	0.825832
		67	221.5	0.795016	0.825829	0.858559	0.899409	0.842545	0.844272	0.0173399		67	221.5	14.3372	14.3329	14.3354	14.3435	14.338	14.3374	0.00176647		67	221.5	0	0	0	0	0	0	0		67	221.5	0.0404165	0.0280852	0.0364126	0.0546022	0.0491007	0.0417234	0.00467012		67	221.5	0.834995	0.843553	0.814292	0.797507	0.819992	0.822068
		68	226.5	0.795257	0.869159	0.759447	0.921374	0.841568	0.837361	0.0282226		68	226.5	14.3374	14.3313	14.3387	14.3403	14.3468	14.3389	0.00250588		68	226.5	0	0	0	0	0	0	0		68	226.5	0.0418808	0.0339112	0.0384219	0.0498565	0.068373	0.0464887	0.0060612		68	226.5	0.832621	0.819971	0.821931	0.794362	0.804154	0.814608
[truncated: 46 more columns]
