# Supplementary material for: Myosin-based regulation of twitch and tetanic contractions in mammalian skeletal muscle
Source: eLife. 2021 Jun 14;10:e68211. doi: 10.7554/eLife.68211 (PMC8275128; doi:10.7554/eLife.68211)
Supplement: Figure 6—source data 1. [file elife-68211-fig6-data1.xlsx]

## Sheet: M3 Modelling Data
			Rest (Figure 6 B)			Early Activation (Figure 6 C)			Twitch Peak Force (Figure 6 D)			Twitch Mechanically Relaxed (Figure 6 E)			Tetanus Peak Force (Figure 6 F)			Tetanus Mechanically Relaxed (Figure 6 G)
Key	Reciprocal Spacing (nm-1)	Model Reciprocal Spacing (nm-1)	Average Intensity	Intensity SD	Model Intensity	Average Intensity	Intensity SD	Model Intensity	Average Intensity	Intensity SD	Model Intensity	Average Intensity	Intensity SD	Model Intensity	Average Intensity	Intensity SD	Model Intensity	Average Intensity	Intensity SD	Model Intensity
Rest	0.063991	0.06588	0.000263388	0.000125732	0.00019	0.000416846	0.000141967	7e-05	0.000440975	0.000167318	8e-05	0.00028856	8.25766e-05	3e-05	0.000662412	0.00030293	0.00013	0.000277911	3.9936e-05	0.00011
Early Activation	0.0642008	0.06609	0.000434078	8.31455e-05	0.00016	0.000354619	0.000235539	3e-05	0.000357335	0.000120907	0.00016	0.000476902	6.88698e-05	3e-05	0.000594147	0.000200434	0.00016	0.000498158	9.38554e-05	6e-05
Peak Force	0.0644106	0.0663	0.000779631	0.000159804	9e-05	0.0003466	0.00020994	3e-05	0.000365482	8.27192e-05	0.00019	0.000685408	0.000114448	0.00011	0.000470094	0.000220029	0.00025	0.000689858	7.11341e-05	3e-05
Mechanically Relaxed	0.0646204	0.06651	0.00102619	0.000207046	4e-05	0.000400089	0.000170311	0.00011	0.000400891	0.000199197	0.00014	0.000918434	0.000258914	0.00024	0.000502106	0.000251499	0.00052	0.000709553	0.000137236	6e-05
	0.0648302	0.06672	0.000846074	0.00017595	9e-05	0.000489664	0.000252031	0.00027	0.000401876	8.7482e-05	0.00011	0.000646727	0.000226542	0.00037	0.000596268	0.000212577	0.00098	0.00059598	0.000159815	0.00017
	0.06504	0.06693	0.000510043	9.47516e-05	0.00023	0.000568221	0.000167698	0.00041	0.000274681	3.68388e-05	0.00013	0.000490159	2.15349e-05	0.00036	0.00064765	0.000152844	0.00113	0.000428156	0.000100806	0.00032
	0.0652498	0.06714	0.000286875	5.69352e-05	0.00038	0.00060259	0.000189707	0.0004	0.000349842	5.78258e-05	0.00014	0.000360997	8.02385e-05	0.00023	0.000490079	0.000142274	0.00079	0.000485075	6.96797e-05	0.00039
	0.0654596	0.06735	0.000323337	0.000105408	0.0004	0.000542517	0.000221238	0.00025	0.000334285	4.58021e-05	9e-05	0.000413523	4.76353e-05	0.0001	0.000481687	0.000172393	0.0006	0.000558253	7.44941e-05	0.0003
	0.0656694	0.06756	0.000499295	6.49354e-05	0.00026	0.000479284	0.000124341	0.0001	0.000363646	0.000105081	7e-05	0.000448726	4.86809e-05	5e-05	0.000479499	0.00017994	0.00203	0.000526952	4.76611e-05	0.00015
	0.0658792	0.06777	0.000729652	0.000118804	0.00012	0.000748998	0.000165432	8e-05	0.000528452	0.00015875	0.00022	0.00064416	6.73074e-05	0.00011	0.000582212	0.000245009	0.00757	0.000530694	0.000157478	6e-05
	0.0660891	0.06798	0.000740411	0.000147819	0.0001	0.000721138	0.000250715	0.00026	0.000495539	0.000291024	0.00084	0.00073269	0.000188893	0.00036	0.000408695	0.000132943	0.01802	0.000610922	9.52272e-05	0.00012
	0.0662989	0.06819	0.000606761	9.96843e-05	0.00029	0.000782995	0.00037056	0.00068	0.000522279	0.000111526	0.00203	0.000589997	6.29838e-05	0.00076	0.000321867	0.00017623	0.02709	0.000722505	0.000119373	0.00037
	0.0665087	0.0684	0.000449796	0.000111773	0.00071	0.000629134	0.000203261	0.0011	0.000533177	0.000117342	0.00308	0.000541048	5.54498e-05	0.00101	0.000482317	0.000159217	0.026	0.000751333	0.000146635	0.00074
	0.0667185	0.06861	0.000417118	0.00014295	0.00105	0.000561813	0.000189728	0.00118	0.00067341	0.00031208	0.00302	0.000579968	4.31728e-05	0.00099	0.00075061	0.000291849	0.01722	0.000679195	0.000142803	0.00092
	0.0669283	0.06882	0.000400609	8.62327e-05	0.00127	0.000701145	0.000173693	0.00134	0.000802475	0.00050369	0.00235	0.000497081	9.27373e-05	0.00149	0.000988482	0.000230796	0.01342	0.000496408	0.000139263	0.00106
	0.0671381	0.06903	0.000480602	0.000107673	0.00257	0.00101201	0.000304101	0.00293	0.00102698	0.000564081	0.00308	0.000465492	0.0001136	0.00375	0.00123616	0.000396515	0.01852	0.000406239	0.000130351	0.00225
	0.0673479	0.06924	0.000438947	0.000112785	0.00623	0.00141268	0.000358031	0.00634	0.00110356	0.00081969	0.0057	0.000460381	0.000104119	0.00759	0.00152077	0.000499329	0.02237	0.000368984	7.33009e-05	0.00527
	0.0675577	0.06945	0.000329466	7.80453e-05	0.01072	0.00136609	0.000390082	0.00948	0.00092375	0.000485225	0.00776	0.000362797	8.56406e-05	0.01068	0.00300555	0.000903744	0.01756	0.000436782	8.47613e-05	0.00867
	0.0677675	0.06966	0.000277603	0.000114196	0.01217	0.00110684	0.000307606	0.00958	0.00087046	0.000354128	0.00685	0.000360277	8.14111e-05	0.01055	0.00776523	0.0025372	0.00869	0.000557149	0.000158471	0.00955
	0.0679773	0.06987	0.000261057	0.000113127	0.0091	0.000732701	0.000136284	0.00655	0.00121451	0.000504643	0.00397	0.000423442	0.000121407	0.00729	0.0167738	0.00564511	0.00272	0.000686308	0.000122091	0.00706
	0.0681871	0.07008	0.000433092	0.000169697	0.00462	0.000647459	0.000157223	0.00316	0.00197043	0.000819697	0.0019	0.000556288	7.23551e-05	0.00354	0.0253823	0.00841911	0.00079	0.000730599	0.000132912	0.00363
	0.0683969	0.07029	0.000723733	0.000134089	0.00227	0.00075774	0.000225123	0.00176	0.00287287	0.00124479	0.00155	0.000724102	9.85664e-05	0.00162	0.0259792	0.00846712	0.00092	0.000716832	8.1153e-05	0.00197
	0.0686067	0.07049	0.000979027	0.000151746	0.00207	0.0010518	0.000201524	0.00192	0.00300951	0.00109714	0.00166	0.000763419	0.000101616	0.00149	0.0179671	0.00635109	0.00144	0.000695019	0.000111833	0.00211
	0.0688165	0.0707	0.00112522	0.000250473	0.00198	0.00123056	0.000265207	0.002	0.00234816	0.000793793	0.00125	0.00100447	0.000280891	0.00169	0.0134145	0.00499106	0.0014	0.00096876	0.000121843	0.00232
	0.0690263	0.07091	0.00237114	0.0004293	0.00124	0.00205037	0.000600765	0.00138	0.00298422	0.00154016	0.00059	0.00245628	0.000453468	0.00133	0.0183176	0.00653931	0.0008	0.00225316	0.00021998	0.0017
	0.0692361	0.07112	0.00635463	0.00105729	0.00048	0.00503401	0.00183618	0.00061	0.00554055	0.00316635	0.00018	0.00633359	0.00135932	0.00067	0.0222555	0.00746959	0.0003	0.00507454	0.000937784	0.0008
	0.069446	0.07133	0.0117677	0.00275988	0.00015	0.00862319	0.00318691	0.00018	0.00758559	0.0042732	0.0001	0.0110875	0.00347036	0.00022	0.0174801	0.00599388	0.00012	0.00865386	0.00213908	0.00025
	0.0696558	0.07154	0.0136232	0.00371224	0.00018	0.0095549	0.00343502	0.00011	0.00628143	0.00336974	0.00018	0.0127495	0.00456541	7e-05	0.00885872	0.00352312	0.00014	0.0104314	0.00286946	0.00011
	0.0698656	0.07175	0.0100135	0.00266566	0.00038	0.00668849	0.00243856	0.00023	0.00377893	0.00169415	0.00027	0.00932152	0.00315946	0.00011	0.00367196	0.00153953	0.00022	0.00819283	0.00228353	0.00021
	0.0700754	0.07196	0.00440862	0.000870671	0.00051	0.00294862	0.000948222	0.00039	0.00211045	0.00101529	0.00026	0.00411428	0.000831142	0.00027	0.00205156	0.000778756	0.00023	0.0041913	0.00100948	0.00038
	0.0702852		0.00203366	0.000147378		0.00197703	0.000761645		0.00169269	0.00101394		0.00187396	9.7343e-05		0.00160421	0.00057793		0.00196533	0.000352824
	0.070495		0.00244929	0.000569516		0.00222077	0.000931496		0.00154008	0.000826947		0.00221514	0.000572671		0.00213075	0.000630223		0.00211088	0.000439048
	0.0707048		0.00244515	0.000639561		0.00198215	0.000902699		0.00114366	0.000519831		0.00224992	0.000740472		0.00218585	0.000583466		0.0022702	0.000534396
	0.0709146		0.0013036	0.000250625		0.001036	0.000540323		0.000756908	0.000275788		0.00129731	0.000334215		0.00159831	0.000520935		0.00148457	0.000325804
	0.0711244		0.000521784	7.33779e-05		0.000526718	0.000206815		0.000448818	5.76462e-05		0.000556718	3.93484e-05		0.000868652	0.000368398		0.000722157	6.59833e-05
	0.0713342		0.000323224	9.1409e-05		0.000459314	0.000280328		0.000366184	0.000168296		0.000338263	8.00354e-05		0.000684448	0.000263623		0.000423289	6.50709e-05
	0.071544		0.000248376	6.33809e-05		0.000386732	0.000190438		0.000271232	0.000120623		0.000269594	6.24943e-05		0.000552421	0.000202852		0.000367836	6.33985e-05
	0.0717538		0.000308788	9.49433e-05		0.000394977	0.000184992		0.000312066	0.000130426		0.000251522	4.88319e-05		0.000650571	0.000231732		0.000321264	7.99221e-05
	0.0719636		0.000318015	8.46358e-05		0.000346079	0.000135823		0.000301311	5.5684e-05		0.000227206	3.95955e-05		0.000588479	0.00034286		0.000242847	4.99081e-05
Note - Reciprocal spacing is plotted against average intensity for a given time point, whilst model spacing is plotted against model intensity for a given time point.
e.g. - To plot data at rest (cyan), column B is plotted against column D, and standard deviation appended from column E, and the fit from the modelling is superimposed by plotting column C against column F.
